# Supplementary material for: The GIS2 Gene Is Repressed by a Zinc-Regulated Bicistronic RNA in Saccharomyces cerevisiae
Source: Genes (Basel). 2018 Sep 19;9(9):462. doi: 10.3390/genes9090462 (PMC6162548; doi:10.3390/genes9090462)
Supplement: Supplementary file 1 [file genes-09-00462-s001.xlsx]

## Sheet: gis2 vs WT HZ
Gene names	Systematic Name	Protein names	Uniprot IDs	Log 2 HZ gis2 1	Log 2 HZ gis2 2	Log 2 HZ gis2 3	Log 2 HZ gis2 4	Coefficient of Variation (%)	Log 2 HZ WT 1	Log 2 HZ WT 2	Log 2 HZ WT 3	Log 2 HZ WT 4	Coefficient of Variation (%)	HZ gis2 Fold Change	HZ gis2 p-value
AAC1	YMR056C	ADP,ATP carrier protein 1	P04710	29.0129	28.6728	28.8965	28.6708	11.8935	27.0736	28.9509	28.4652	28.9708	43.2048	0.448164	0.36182
AAH1	YNL141W	Adenine deaminase	P53909	32.2114	31.9803	32.1643	32.1344	6.76197	32.0459	32.1542	32.2507	32.2883	7.41069	-0.0621706	0.431655
AAP1	YHR047C	Alanine/arginine aminopeptidase	P37898	31.1406	31.0278	31.1051	31.2544	6.58725	31.1906	30.9853	31.0975	31.2064	7.30421	0.0120368	0.867941
AAT1	YKL106W	Aspartate aminotransferase, mitochondrial	Q01802	28.6382	28.6465	28.7419	28.5816	4.65242	28.7963	28.7603	28.6668	28.6465	13.103	-0.0654011	0.231142
AAT2	YLR027C	Aspartate aminotransferase, cytoplasmic	P23542	33.8918	33.7892	33.905	33.8031	4.12759	33.8733	33.844	33.8666	33.8523	3.49778	-0.0117737	0.712999
ABD1	YBR236C	mRNA cap guanine-N7 methyltransferase	P32783	31.3791	31.2187	31.406	31.3898	5.867	31.3134	31.4152	31.3877	31.3519	5.88584	-0.018639	0.715967
ABF1	YKL112W	ARS-binding factor 1	P14164	30.0036	30.4172	30.4701	30.2235	14.2167	30.3674	30.2515	30.3448	30.1176	8.7379	0.00830211	0.947158
ABF2	YMR072W	ARS-binding factor 2, mitochondrial	Q02486	30.6012	30.535	30.7101	30.7167	6.06568	30.8585	30.9896	30.7931	30.694	12.7488	-0.193077	0.0441627
ABP1	YCR088W	Actin-binding protein	P15891	33.4617	33.5747	33.5308	33.5589	3.42432	33.7559	33.6351	33.5976	33.6047	4.99311	-0.116792	0.0392315
ABP140	YOR239W	tRNA(Thr) (cytosine(32)-N(3))-methyltransferase	Q08641	30.4094	30.4548	30.4724	30.411	2.19601	30.2996	30.3389	30.3699	30.1844	4.74463	0.138702	0.0189831
ABZ1	YNR033W	Aminodeoxychorismate synthase	P37254	28.6194	28.0674	28.228	28.2444	17.0122	28.2563	28.1283	28.2403	28.5366	5.01922	-0.000577754	0.996964
ABZ2	YMR289W	Aminodeoxychorismate lyase	Q03266	27.1086	27.0945	26.8674	27.159	8.63573	27.2536	27.3463	27.2093	27.0735	13.0022	-0.163288	0.106901
ACB1	YGR037C	Acyl-CoA-binding protein	P31787	27.4013	26.8918	27.4054	27.5662	18.6665	27.3149	27.0188	27.4599	27.2895	17.0204	0.045392	0.801857
ACC1	YNR016C	Acetyl-CoA carboxylase;Biotin carboxylase	Q00955	35.9682	35.8608	35.9073	35.8895	3.17042	35.5462	35.6721	35.9088	35.7013	6.16043	0.199334	0.0441983
ACE2	YLR131C	Metallothionein expression activator	P21192	27.4577	27.6508	28.0371	27.6638	17.506	27.8338	27.6527	27.5346	27.2913	54.7787	0.124253	0.48271
ACF2	YLR144C	Endo-1,3(4)-beta-glucanase 2	Q12168	28.1753	27.8455	28.197	27.7658	15.2618	28.0057	28.0718	27.8162	28.2184	10.5018	-0.0321102	0.824934
ACF4	YJR083C	Assembly-complementing factor 4	P47129	27.8664	28.4932	28.7371	28.5227	23.455	28.7298	28.8678	28.5048	28.5807	6.43156	-0.265923	0.240437
ACH1	YBL015W	Acetyl-CoA hydrolase	P32316	30.2824	30.1143	30.0675	30.1042	6.81745	30.2695	30.3088	30.2094	30.1513	5.22679	-0.0926426	0.167257
ACK1	YDL203C	Activator of C kinase protein 1	Q07622	25.1792	25.3825	25.036	25.0119	12.1516	25.5306	25.0147	25.3923	24.8805	13.2661	-0.0521013	0.776568
ACO1	YLR304C	Aconitate hydratase, mitochondrial	P19414	32.8956	32.7019	32.9185	32.788	6.88927	33.0891	33.0946	32.9371	33.0106	3.16617	-0.206843	0.0162454
ACO2	YJL200C	Homocitrate dehydratase, mitochondrial	P39533	30.977	30.9865	31.0241	30.9028	3.48876	31.2055	31.2251	31.1031	31.1062	2.36711	-0.187407	0.003812
ACP1	YKL192C	Acyl carrier protein, mitochondrial	P32463	29.6688	29.0151	29.7014	28.7348	31.8945	29.7714	29.9517	29.7152	29.1498	18.3637	-0.366997	0.26233
ACS2	YLR153C	Acetyl-coenzyme A synthetase 2	P52910	34.2826	34.459	34.331	34.3389	5.28704	34.3706	34.318	34.308	34.3272	1.74811	0.0219621	0.60241
ACT1	YFL039C	Actin	P60010	35.8234	35.8788	35.9301	35.861	3.08225	35.958	35.9397	35.9188	35.9349	5.71307	-0.0645074	0.0339441
ADA2	YDR448W	Transcriptional adapter 2	Q02336	27.2794	26.4947	26.5661	26.5116	29.3912	26.7824	26.95	26.8875	27.08	15.2503	-0.212029	0.328472
ADD37	YMR184W	Alpha1-proteinase inhibitor-degradation deficient protein 37	Q03233	26.8404	27.1326	27.086	27.1627	9.71984	27.21	27.5535	27.6024	27.8124	11.2553	-0.489159	0.0149042
ADD66	YKL206C	Proteasome assembly chaperone 2	P36040	27.2483	26.9144	27.1603	27.2723	10.8342	27.3391	27.0912	27.3023	27.4699	5.98606	-0.151766	0.229105
ADE1	YAR015W	Phosphoribosylaminoimidazole-succinocarboxamide synthase	P27616	30.7072	30.6737	30.733	30.799	3.70529	31.0044	31.0283	31.0497	31.1043	8.87669	-0.318479	8.45211e-05
ADE12	YNL220W	Adenylosuccinate synthetase	P80210	33.0357	33.019	32.9986	33.0913	2.77886	33.1348	33.1652	33.1543	33.1141	3.53298	-0.105971	0.00354238
ADE13	YLR359W	Adenylosuccinate lyase	Q05911	32.1995	32.2357	32.3782	32.2237	5.73356	32.22	32.2472	32.3355	32.1244	1.08277	0.0275051	0.659237
ADE16	YLR028C	Bifunctional purine biosynthesis protein ADE16;Phosphoribosylaminoimidazolecarboxamide formyltransferase;IMP cyclohydrolase	P54113	32.6358	32.3755	32.2285	32.5012	12.0154	32.5965	32.5131	32.5646	32.6268	7.62755	-0.140009	0.172242
ADE17	YMR120C	Bifunctional purine biosynthesis protein ADE17;Phosphoribosylaminoimidazolecarboxamide formyltransferase;IMP cyclohydrolase	P38009	33.5225	33.4294	33.3506	33.4694	4.98983	33.7021	33.6113	33.6031	33.629	2.93768	-0.193388	0.00396837
ADE2	YOR128C	Phosphoribosylaminoimidazole carboxylase	P21264	31.6028	31.4647	31.4877	31.5449	4.31347	31.6145	31.6071	31.6558	31.5997	2.55523	-0.0942147	0.0302465
ADE3	YGR204W	C-1-tetrahydrofolate synthase, cytoplasmic;Methylenetetrahydrofolate dehydrogenase;Methenyltetrahydrofolate cyclohydrolase;Formyltetrahydrofolate synthetase	P07245	34.5553	34.3454	34.3703	34.5073	7.11834	34.557	34.4114	34.503	34.5286	4.07677	-0.055408	0.392801
ADE4	YMR300C	Amidophosphoribosyltransferase	P04046	31.8103	31.9115	31.7246	31.7343	6.08569	31.7521	31.8119	31.8051	31.8106	3.77992	0.000269975	0.995465
ADE5,7	YGL234W	Bifunctional purine biosynthetic protein ADE5,7;Phosphoribosylamine--glycine ligase;Phosphoribosylformylglycinamidine cyclo-ligase	P07244	34.2024	33.9934	33.9297	34.1578	8.98487	34.161	34.0415	34.1716	34.1795	5.46619	-0.0675554	0.388897
ADE6	YGR061C	Phosphoribosylformylglycinamidine synthase	P38972	34.1246	33.9681	34.0287	34.1301	5.4022	34.079	34.0112	34.0811	34.046	3.00297	0.00855801	0.847285
ADE8	YDR408C	Phosphoribosylglycinamide formyltransferase	P04161	29.3305	29.3054	29.3927	29.3562	2.5906	29.166	29.2233	29.3187	29.5668	3.56397	0.0275079	0.771302
ADH1	YOL086C	Alcohol dehydrogenase 1	P00330	37.0687	37.1678	37.1408	37.1946	3.71765	37.1852	37.2814	37.2396	37.2374	3.67953	-0.0929306	0.0322227
ADH3	YMR083W	Alcohol dehydrogenase 3, mitochondrial	P07246	32.4737	32.3473	32.368	32.5176	5.70032	32.4988	32.5462	32.5043	32.6069	5.57776	-0.112393	0.0578855
ADH4	YGL256W	Alcohol dehydrogenase 4	P10127	26.8098	26.1988	26.3837	26.7285	19.5419	28.1387	27.2629	27.2726	27.2395	17.4639	-0.948212	0.0113107
ADH5	YBR145W	Alcohol dehydrogenase 5	P38113	30.4816	30.5517	30.3335	30.2181	10.2702	30.3246	30.4762	30.3421	30.4227	10.7287	0.00481328	0.955508
ADH6	YMR318C	NADP-dependent alcohol dehydrogenase 6	Q04894	32.8308	32.7348	32.5449	32.7602	8.22403	32.6482	32.6298	32.777	32.7978	6.0719	0.00447351	0.954259
ADI1	YMR009W	1,2-dihydroxy-3-keto-5-methylthiopentene dioxygenase	Q03677	25.6606	24.887	25.6813	25.3209	23.9288	26.3401	26.0745	25.9622	24.6161	44.3066	-0.360782	0.431776
ADK1	YDR226W	Adenylate kinase	P07170	33.2423	33.0739	33.204	33.4638	11.4841	33.0753	33.1953	32.9127	32.7765	19.1176	0.256024	0.0814387
ADO1	YJR105W	Adenosine kinase	P47143	34.7301	34.6376	34.4748	34.6341	7.2232	34.6656	34.6944	34.7473	34.8001	5.62486	-0.10771	0.12664
ADP1	YCR011C	Probable ATP-dependent permease	P25371	28.4659	28.4045	28.3596	28.2373	6.60851	28.3084	28.0346	28.1002	28.0583	9.0841	0.24142	0.0223769
ADR1	YDR216W	Regulatory protein ADR1	P07248	31.8727	32.0285	32.0984	32.0126	6.44072	31.3791	31.226	31.2709	31.2711	5.24419	0.716257	1.61925e-05
AEP3	YPL005W	ATPase expression protein 3	Q12089	22.5929	23.3668	23.5122	23.2588	24.9188			23.692	22.8714	21.7386	-0.0989994	0.814523
AFG1	YEL052W	Protein AFG1	P32317	27.007	26.8492	26.8235	27.1734	11.4551	26.9691	26.9639	26.6188	27.1756	6.88165	0.0314492	0.830862
AFG2	YLR397C	ATPase family gene 2 protein	P32794	29.5433	29.4023	29.3352	29.4424	6.08192	29.4331	29.3776	29.5138	29.3505	3.45417	0.0120621	0.838074
AFG3	YER017C	Mitochondrial respiratory chain complexes assembly protein AFG3	P39925	28.6462	28.5862	28.4642	28.5088	5.61585	28.5533	28.4176	28.5268	28.9637	12.4857	-0.0640024	0.63068
AFT1	YGL071W	Iron-regulated transcriptional activator AFT1	P22149	27.6275	27.8019	27.7408	27.4999	9.09628	27.8177	27.8924	27.6682	27.5604	3.15703	-0.067182	0.526168
AGE2	YIL044C	ADP-ribosylation factor GTPase-activating protein effector protein 2	P40529	29.4439	29.5732	29.6091	29.4941	5.17813	29.4706	29.4786	29.5076	29.4601	8.65513	0.0508732	0.23796
AGP1	YCL025C	General amino acid permease AGP1	P25376	25.492	24.9931	24.6724	25.1833	23.6475	25.2578	25.329	25.2236	25.6365	12.0295	-0.276497	0.207798
AGX1	YFL030W	Alanine--glyoxylate aminotransferase 1	P43567	25.8498	25.6151		25.7787	8.20952	25.9929	25.4762	22.5418	24.6996	11.0824	1.07024	0.288256
AHA1	YDR214W	Hsp90 co-chaperone AHA1	Q12449	31.965	32.0858	32.1459	31.9964	5.76117	31.1411	31.2019	30.9627	31.1486	4.69168	0.934682	8.10787e-06
AHC1	YOR023C	Protein AHC1	Q12433	22.1666	23.5863	24.2502	23.6568	49.4339	23.2398	23.477	23.193	23.2561	14.9875	0.123517	0.791327
AHP1	YLR109W	Peroxiredoxin type-2	P38013	35.4527	35.348	35.2027	35.446	7.89672	35.3056	35.3006	35.3614	35.3641	4.26034	0.0294243	0.645921
AIF1	YNR074C	Apoptosis-inducing factor 1	P52923	26.8374	25.529	25.84	26.4244	40.3019	26.6438	26.288	26.3698	27.0752	19.8539	-0.436515	0.249551
AIM10	YER087W	Probable proline--tRNA ligase, mitochondrial	P39965	26.5546	26.3207	26.0198	26.2841	15.0527	26.1829	25.8526	25.5494	26.553	12.8134	0.260314	0.323528
AIM14	YGL160W	Probable metalloreductase AIM14	P53109	25.9816	26.3133	26.8147	26.2664	25.2064	26.6258	26.2522	26.253	26.5436	11.5979	-0.0746098	0.720126
AIM17	YHL021C	Probable oxidoreductase AIM17	P23180	30.5393	30.3845	30.3709	30.4328	5.38692	30.4281	30.3637	30.4917	30.4398	14.2907	0.00105062	0.982657
AIM18	YHR198C	Altered inheritance of mitochondria protein 18, mitochondrial	P38884	25.4516	26.0526	25.9551	25.9232	17.0714	26.7945	26.9661	26.6449	26.8307	33.1921	-0.963423	0.000662632
AIM19	YIL087C	Altered inheritance of mitochondria protein 19, mitochondrial	P40502	24.6993	24.6364	24.5103	24.9327	12.5773	25.4691	24.9113	24.4322	25.1323	12.9625	-0.291519	0.260553
AIM2	YAL049C	Protein AIM2	P39721	28.5454	28.0754	28.2131	28.4619	14.9082	28.8863	28.5013	28.66	28.3368	7.97627	-0.272132	0.139577
AIM21	YIR003W	Altered inheritance of mitochondria protein 21	P40563	29.169	28.9262	29.0944	28.7951	11.5227	29.0264	28.983	28.8847	29.0131	7.01193	0.0194034	0.836427
AIM23	YJL131C	Altered inheritance of mitochondria protein 23, mitochondrial	P47015	26.7519	27.2326	27.3328	27.0487	16.9351	27.0667	27.4142	26.8738	26.9605	13.0802	0.0127025	0.944224
AIM24	YJR080C	Altered inheritance of mitochondria protein 24, mitochondrial	P47127	28.0083	28.1226	28.1808	28.0878	4.97142	28.1109	27.966	28.107	27.8584	8.00058	0.0892944	0.253878
AIM25	YJR100C	Altered inheritance rate of mitochondria protein 25	P47140	24.3133	23.8568	24.1193	23.5429	22.4638	23.3986	23.4727		23.7248	18.5215	0.426002	0.103418
AIM29	YKR074W	Altered inheritance rate of mitochondria protein 29	P36154	29.6701	29.4677	29.7392	29.7668	9.02819	30.0375	29.9113	30.115	30.0264	5.75115	-0.3616	0.00390486
AIM3	YBR108W	Altered inheritance of mitochondria protein 3	P38266	28.2551	28.3061	28.125	28.2972	5.65503	28.417	28.3576	28.3514	28.331	10.1813	-0.118385	0.0411131
AIM32	YML050W	Altered inheritance of mitochondria protein 32	Q04689	24.3682	24.3231	24.6648	23.9779	19.2365	24.9397	24.6197	24.9781	24.1743	17.2193	-0.34447	0.190262
AIM34	YMR003W	Altered inheritance of mitochondria protein 34, mitochondrial	Q03673		23.42	23.5342	23.6835	9.20433	24.0334	24.3593	24.3148		24.0774	-0.689951	0.00563354
AIM36	YMR157C	Altered inheritance of mitochondria protein 36, mitochondrial	Q03798	27.5296	27.2481	27.4626	27.327	8.81853	27.2467	27.4111	27.2316	27.4138	13.5845	0.0660282	0.446897
AIM39	YOL053W	Altered inheritance of mitochondria protein 39, mitochondrial	Q08223	25.0328	25.553	25.3173	25.1855	15.5309	25.3568	25.2939	25.4031	24.7295	30.4124	0.0763496	0.70444
AIM41	YOR215C	Altered inheritance of mitochondria protein 41, mitochondrial	Q12032	20.8309	22.4178	23.9123	24.4563	83.3059	24.3733	24.5371	23.9869	23.8561	86.8904	-1.28404	0.172825
AIM43	YPL099C	Altered inheritance of mitochondria protein 43, mitochondrial	Q02888	26.1879	26.0906	26.412	26.2954	9.62615	26.1243	25.8295	26.1601	26.2588	14.587	0.153306	0.232493
AIM45	YPR004C	Probable electron transfer flavoprotein subunit alpha, mitochondrial	Q12480	31.0373	30.9562	31.0054	30.894	4.30099	31.169	31.0898	31.0166	31.004	6.09155	-0.096613	0.0974733
AIM46	YHR199C	Altered inheritance of mitochondria protein 46, mitochondrial	P38885	28.7821	28.8107	28.4523	28.6707	10.8601	29.0564	28.8798	29.0135	28.9784	12.8842	-0.303089	0.0148367
AIM6	YDL237W	Altered inheritance of mitochondria protein 6	Q07716	28.6099	28.631	28.5443	28.4054	6.88933	28.7679	28.5163	28.4036	28.4537	4.34343	0.0122799	0.90194
AIM7	YDR063W	Protein AIM7	Q12156	28.9448	28.2616	28.3702	28.501	22.206	28.2572	28.3157	28.3248	28.4309	9.12355	0.187255	0.270525
AIM9	YER080W	Altered inheritance of mitochondria protein 9, mitochondrial	P40053	31.0785	31.2588	31.3557	30.9862	11.6166	31.1551	31.323	31.0873	31.1017	5.63635	0.00302192	0.976835
AIP1	YMR092C	Actin-interacting protein 1	P46680	31.5401	31.5335	31.4453	31.5734	3.74408	31.5408	31.362	31.4778	31.4337	3.88699	0.0695147	0.185774
AIR1	YIL079C	Protein AIR1	P40507	26.0688	25.962	25.7579	26.0019	8.98812	26.2336	26.1878	26.1675	26.0374	8.89672	-0.208904	0.0384566
AIR2	YDL175C	Protein AIR2	Q12476	26.0875	25.6801	25.9481	25.7379	13.1949	26.1146	26.1932	25.8999	26.2543	13.8108	-0.252111	0.0842557
AKL1	YBR059C	Serine/threonine-protein kinase AKL1	P38080	30.3783	30.4428	30.4528	30.3606	3.18522	30.4152	30.3514	30.3432	30.3106	5.98856	0.0535221	0.142738
AKR1	YDR264C	Palmitoyltransferase AKR1	P39010	30.5654	30.5998	30.5853	30.5285	2.13267	30.3394	30.4999	30.4727	30.5169	10.2424	0.112546	0.0403303
ALA1	YOR335C	Alanine--tRNA ligase, mitochondrial	P40825-2	34.8329	34.8866	34.9934	34.8944	4.68973	34.825	34.8946	34.8694	34.8013	4.70865	0.0542476	0.219359
ALB1	YJL122W	Ribosome biogenesis protein ALB1	P47019	27.1157	27.3641	27.5266	27.3026	11.6883	27.9997	28.0432	28.0132	27.7738	21.4825	-0.630244	0.000965364
ALD2	YMR170C	Aldehyde dehydrogenase [NAD(P)+] 1	P47771	29.4257	29.2583	29.2566	29.3462	5.67108	29.335	29.2757	29.3972	29.4167	7.12852	-0.0344487	0.52918
ALD3	YMR169C	Aldehyde dehydrogenase [NAD(P)+] 2	P54114	22.5721	22.227	21.6892	23.0486	38.6835		21.0824	23.2551	21.5832	95.4708	0.410662	0.552731
ALD4	YOR374W	Potassium-activated aldehyde dehydrogenase, mitochondrial	P46367	33.3008	33.1083	32.8881	33.1294	11.5818	33.0429	33.0313	33.1686	32.9522	12.4248	0.0578561	0.567777
ALD5	YER073W	Aldehyde dehydrogenase 5, mitochondrial	P40047	33.4727	33.1955	33.2862	33.361	8.16868	33.2538	33.4036	33.3066	33.31	6.61637	0.0103289	0.881559
ALD6	YPL061W	Magnesium-activated aldehyde dehydrogenase, cytosolic	P54115	35.9166	35.8728	35.6969	35.9257	7.14861	35.7771	35.7859	35.8848	35.8542	3.23414	0.0274876	0.659798
ALE1	YOR175C	Lysophospholipid acyltransferase	Q08548	28.7285	29.2422	29.3067	28.9704	17.8177	28.8401	29.0567	28.9679	28.8012	6.88717	0.145516	0.355307
ALF1	YNL148C	Tubulin-specific chaperone B	P53904	25.8835	25.9971	25.4211	25.9125	16.5132	25.9341	26.1972	25.7208	26.4537	10.333	-0.272914	0.231977
ALG1	YBR110W	Chitobiosyldiphosphodolichol beta-mannosyltransferase	P16661	27.4237	27.5289	27.5274	27.6009	5.01543	27.0787	27.0896	27.2609	27.3451	11.3939	0.326649	0.00478943
ALG11	YNL048W	GDP-Man:Man(3)GlcNAc(2)-PP-Dol alpha-1,2-mannosyltransferase	P53954	27.6335	27.4789	27.5278	27.4737	5.23146	27.564	27.3058	27.3712	27.4253	13.7436	0.111944	0.141877
ALG12	YNR030W	Dol-P-Man:Man(7)GlcNAc(2)-PP-Dol alpha-1,6-mannosyltransferase	P53730	26.4397	25.5462	26.0063	25.468	32.4842	25.2929	25.0474	25.1353	25.7389	36.8597	0.561408	0.0852874
ALG13	YGL047W	UDP-N-acetylglucosamine transferase subunit ALG13	P53178	26.5417	26.6302	25.8264	26.0642	25.7896	26.9896	27.2344	26.8804	26.9686	30.5667	-0.752609	0.0107722
ALG2	YGL065C	Alpha-1,3/1,6-mannosyltransferase ALG2	P43636	29.3316	29.1699	29.2435	29.3464	5.64972	29.3657	29.413	29.2427	29.1037	5.04381	-0.00846306	0.919725
ALG5	YPL227C	Dolichyl-phosphate beta-glucosyltransferase	P40350	28.2487	28.5405	28.5457	28.1975	12.8094	28.2911	28.4531	28.3372	28.24	15.5034	0.0527488	0.628446
ALG6	YOR002W	Dolichyl pyrophosphate Man9GlcNAc2 alpha-1,3-glucosyltransferase	Q12001	23.481	23.6494	24.0291	23.8826	16.7259	24.0715	23.7889	24.179	24.0267	12.0942	-0.25599	0.131975
ALG9	YNL219C	Alpha-1,2-mannosyltransferase ALG9	P53868	28.4159	28.1819	28.1282	28.2825	8.89867	28.2375	28.1311	28.3221	28.5156	7.21165	-0.049467	0.648151
ALK1	YGL021W	Serine/threonine-protein kinase Haspin homolog ALK1	P43633	28.3808	28.4413	27.6935	28.4044	21.7556	27.7487	28.7193	27.2139	28.3436	6.98202	0.223595	0.574396
ALO1	YML086C	D-arabinono-1,4-lactone oxidase	P54783	30.913	30.8384	30.9074	30.7128	6.3151	30.8125	30.6821	30.823	30.8642	6.98549	0.0474693	0.465902
ALR1	YOL130W	Magnesium transporter ALR1	Q08269	27.0023	27.3779	27.4598	27.4126	13.5587	27.548	27.6037	27.5269	27.585	6.61073	-0.252739	0.0551275
ALT1	YLR089C	Probable alanine aminotransferase, mitochondrial	P52893	30.9108	30.914	30.8814	30.8855	1.16776	30.9952	30.9366	30.843	30.9989	8.53534	-0.0454958	0.269034
ALT2	YDR111C	Probable alanine aminotransferase	P52892	26.8208	27.2736	27.3458	27.2419	15.205	26.7039	27.4042	26.9116	26.9342	9.36316	0.182057	0.374064
ALY1	YKR021W	Arrestin-related trafficking adapter 6	P36117	27.2047	26.9107	26.7461	27.0291	13.4181	27.1647	27.2415	26.9134	27.3761	13.9842	-0.201294	0.192442
ALY2	YJL084C	Arrestin-related trafficking adapter 3	P47029	27.785	28.1012	28.0201	27.9103	9.4183	27.9129	27.9079	27.8382	27.9477	4.63031	0.0524643	0.495662
AMD1	YML035C	AMP deaminase	P15274	30.2264	30.0883	30.1911	30.0702	5.3087	30.063	30.1112	30.2165	30.2077	6.14006	-0.00561659	0.919841
AME1	YBR211C	Central kinetochore subunit AME1	P38313	25.0352	24.9799	24.5837	25.4251	23.7751	25.6168	24.8101	25.0058	24.8464	13.7895	-0.0637826	0.810336
AML1	YGR001C	N(6)-adenine-specific DNA methyltransferase-like 1	P53200	30.9226	30.7608	30.8871	30.9784	6.28748	30.7254	30.7962	30.8214	31.0034	4.44963	0.0506324	0.524967
AMS1	YGL156W	Alpha-mannosidase	P22855	29.1326	28.5684	28.7788	28.5024	20.6422	28.6147	28.3393	28.6059	28.56	13.0501	0.215558	0.215976
ANB1	YJR047C	Eukaryotic translation initiation factor 5A-2	P19211			23.7974	23.9484	7.39581	24.1374	23.8636	23.8785	23.9434	3.84629	-0.0828177	0.475056
ANP1	YEL036C	Mannan polymerase II complex ANP1 subunit	P32629	28.9387	28.6717	28.5667	28.5799	12.5274	28.4796	28.4656	28.4455	28.2663	1.969	0.274988	0.0329267
ANR2	YKL047W	Uncharacterized protein ANR2	P36090	26.8275	26.7217	26.8023	26.976	7.47756	26.6458	26.8147	26.7312	26.4625	16.97	0.168304	0.11763
ANT1	YPR128C	Peroxisomal adenine nucleotide transporter 1	Q06497	26.6617	26.8561	27.253	27.1043	17.9376	26.6402	26.8636	26.8199	26.864	6.84255	0.171867	0.270102
AOS1	YPR180W	DNA damage tolerance protein RHC31	Q06624	28.5692	28.7573	28.6893	28.6975	5.3812	28.5156	28.7501	28.4832	28.3606	5.47567	0.150953	0.146135
APA1	YCL050C	Protein APA1;5,5-P-1,P-4-tetraphosphate phosphorylase;ADP-sulfurylase	P16550	32.4121	32.322	32.35	32.5313	6.55681	32.7915	32.594	32.663	32.7616	8.21638	-0.298703	0.00370131
APA2	YDR530C	5,5-P-1,P-4-tetraphosphate phosphorylase 2	P22108	26.4813	26.4912	26.1934	26.5428	10.4095	26.4505	26.3207	26.6078	26.508	39.689	-0.0445799	0.669004
APC1	YNL172W	Anaphase-promoting complex subunit 1	P53886	28.3624	27.9213	28.5308	28.7819	23.9059	28.6019	28.1084	27.7309	28.0198	65.7021	0.283882	0.310175
APD1	YBR151W	Actin patches distal protein 1	P38281	30.338	30.3679	30.3694	30.218	4.85841	30.2703	30.3371	30.1487	30.2128	2.81796	0.0810909	0.182976
APE2	YKL157W	Aminopeptidase 2, mitochondrial	P32454	33.1778	32.9257	33.0064	33.001	7.55885	33.0151	32.9123	32.9985	32.9932	4.56969	0.047907	0.440781
APE3	YBR286W	Aminopeptidase Y	P37302	33.1821	33.2156	33.1885	33.1847	1.07807	33.1089	33.1869	33.2204	33.1492	2.90765	0.0263509	0.337192
APE4	YHR113W	Aspartyl aminopeptidase 4	P38821	30.9181	30.6835	30.6793	30.7906	7.94837	30.9324	30.9079	30.8324	30.9093	6.51238	-0.127641	0.0788976
APJ1	YNL077W	J domain-containing protein APJ1	P53940	26.0944	26.0924	26.2772	25.8707	11.4075	25.3716	26.0023	25.5789	25.9088	8.86712	0.368295	0.0711342
APL1	YJR005W	AP-2 complex subunit beta	P27351	27.2642	26.4967	26.6424	26.9973	24.314	26.7382	26.2591	26.4795	26.8173	12.0384	0.27667	0.245834
APL2	YKL135C	AP-1 complex subunit beta-1	P36000	26.8866	26.9597	27.1938	27.0487	9.2973	27.1567	27.1474	27.0901	27.0316	11.6237	-0.0842802	0.287228
APL3	YBL037W	AP-2 complex subunit alpha	P38065	27.1989	26.8103	26.6733	26.8596	16.1929	26.8404	26.7192	26.7104	26.6877	11.4212	0.146104	0.257539
APL4	YPR029C	AP-1 complex subunit gamma-1	Q12028	28.689	28.4752	28.4495	28.7908	11.5649	28.6	28.3679	28.5479	28.4447	12.0252	0.111032	0.299913
APL5	YPL195W	AP-3 complex subunit delta	Q08951	29.4698	29.4353	29.545	29.4566	3.34656	29.5773	29.5672	29.5012	29.4773	4.23701	-0.0540931	0.165061
APL6	YGR261C	AP-3 complex subunit beta	P46682	29.1907	29.0698	29.1139	29.1056	3.56009	29.2818	29.1812	29.2115	29.0045	4.61185	-0.0497414	0.468077
APM1	YPL259C	AP-1 complex subunit mu-1-I	Q00776	27.4427	27.3643	27.5128	27.4287	4.22787	27.6156	27.7356	27.7447	28.0496	6.55723	-0.349271	0.0115748
APM2	YHL019C	Adaptin medium chain homolog APM2	P38700		23.0428	23.1758	23.4352	14.0839	23.5557	23.5816		23.3977	21.4457	-0.293759	0.0846579
APM3	YBR288C	AP-3 complex subunit mu	P38153	28.3964	28.7103	28.5796	28.5878	8.82526	28.7553	28.7834	28.6468	28.5917	5.2565	-0.125789	0.161812
APM4	YOL062C	AP-2 complex subunit mu	Q99186	26.5356	26.5421	26.0559	26.6484	16.8457	26.4609	25.9916	26.2348	26.8488	24.6166	0.0614978	0.793942
APN1	YKL114C	DNA-(apurinic or apyrimidinic site) lyase 1	P22936	28.4877	28.2078	28.298	28.2524	8.79599	28.2284	28.1531	28.2698	28.3361	4.43769	0.0646235	0.407057
APP1	YNL094W	Phosphatidate phosphatase APP1	P53933		23.9209	22.7591		54.0517	23.4241	23.7518	23.1243	23.2117	19.697	-0.0379655	0.931141
APS2	YJR058C	AP-2 complex subunit sigma	Q00381	25.9158	25.6194	24.5876	25.6143	33.6365	25.8371	25.5829	26.1069	25.9443	19.1042	-0.433547	0.212737
APS3	YJL024C	AP-3 complex subunit sigma	P47064	26.6317	26.7764	26.4736	26.4783	10.1905	26.7617	26.5742	26.2544	26.6266	13.578	0.0357922	0.791455
APT1	YML022W	Adenine phosphoribosyltransferase 1	P49435	29.5843	29.083	29.1656	29.4012	15.9997	30.0024	29.8938	30.0688	30.0169	21.4747	-0.686942	0.00122074
APT2	YDR441C	Adenine phosphoribosyltransferase 2	P36973	25.063		24.798	25.0032	9.40791	25.5766	25.2286	25.5814	25.4927	11.3557	-0.515104	0.00748294
AQR1	YNL065W	Probable transporter AQR1	P53943	23.8057	24.1617	23.4051	24.0678	21.9941	23.6378	23.5781	23.8588	23.9995	36.0671	0.0915291	0.656277
ARA1	YBR149W	D-arabinose dehydrogenase [NAD(P)+] heavy chain	P38115	32.4366	32.2281	32.1969	32.5195	10.9512	32.473	32.303	32.5514	32.4527	6.65116	-0.0997443	0.330982
ARA2	YMR041C	D-arabinose 1-dehydrogenase	Q04212	27.5562	27.0328	27.5111	27.3855	15.3958	27.5388	27.4203	27.3585	27.6549	20.9236	-0.121731	0.403496
ARB1	YER036C	ABC transporter ATP-binding protein ARB1	P40024	33.446	33.4229	33.4626	33.435	1.16939	33.3308	33.3481	33.4671	33.4452	3.74282	0.0438386	0.25914
ARC1	YGL105W	tRNA-aminoacylation cofactor ARC1	P46672	33.8559	33.8299	33.9383	33.8809	3.23368	33.845	33.8232	33.8662	33.8551	3.91257	0.028908	0.289872
ARC15	YIL062C	Actin-related protein 2/3 complex subunit 5	P40518	27.0505	26.3129	26.2275	26.6972	27.0942	26.7153	26.957	26.913	26.8839	9.62668	-0.295263	0.18389
ARC18	YLR370C	Actin-related protein 2/3 complex subunit 3	Q05933	28.6263	28.4225	28.5933	28.5251	6.14998	29.1003	28.998	28.9854	29.26	17.4305	-0.544101	0.000425635
ARC19	YKL013C	Actin-related protein 2/3 complex subunit 4	P33204	28.2156	28.1607	28.3487	28.1245	6.94972	28.6362	28.7049	28.7942	28.659	29.4362	-0.486225	0.000194709
ARC35	YNR035C	Actin-related protein 2/3 complex subunit 2	P53731	31.2774	31.0995	30.8833	31.2456	12.0224	31.0871	31.0337	30.9994	31.2803	3.98104	0.0263279	0.81809
ARC40	YBR234C	Actin-related protein 2/3 complex subunit 1	P38328	30.4453	30.3928	30.6489	30.5115	7.81145	30.1095	30.1783	30.2284	30.0599	5.14751	0.355618	0.00177071
ARD1	YHR013C	N-terminal acetyltransferase A complex catalytic subunit ARD1	P07347	29.8971	29.4178	29.8901	29.7816	14.576	29.4975	29.7935	29.5671	29.5059	6.79625	0.155641	0.284094
ARE1	YCR048W	Sterol O-acyltransferase 1	P25628	27.3588	27.6386	27.7969	27.5102	12.9183	27.7258	27.6288	27.1213	27.6982	13.3166	0.0325711	0.854406
ARE2	YNR019W	Sterol O-acyltransferase 2	P53629	29.2129	29.3367	29.1396	29.1313	6.71982	29.2941	29.2372	29.2292	29.2046	4.59257	-0.036112	0.506697
ARF1	YDL192W	ADP-ribosylation factor 1	P11076	33.7781	33.585	33.6087	33.6114	6.34787	33.2894	33.3091	33.3718	33.1819	7.59306	0.357781	0.0009546
ARF2	YDL137W	ADP-ribosylation factor 2	P19146	29.7289	29.3278	29.0349	29.5137	19.9687	29.4129	29.5625	29.7609	29.7316	14.1492	-0.21562	0.246284
ARF3	YOR094W	ADP-ribosylation factor 3	P40994	23.5804	22.2526	22.8132	21.6233	57.4939		23.0392	23.4855	23.6043	26.3682	-0.808986	0.175537
ARG1	YOL058W	Argininosuccinate synthase	P22768	35.7555	35.7557	35.7573	35.7467	0.333375	35.84	35.9159	35.8577	35.8466	5.60682	-0.111264	0.000707489
ARG2	YJL071W	Amino-acid acetyltransferase, mitochondrial	P40360	27.4455	27.1761	27.3461	27.2335	8.36144	27.1209	26.9231	27.1546	27.6998	11.8532	0.0757109	0.683579
ARG3	YJL088W	Ornithine carbamoyltransferase	P05150	32.4542	32.022	32.0127	32.1216	15.1826	32.1917	32.0729	32.268	32.1363	13.2682	-0.0146155	0.899985
ARG4	YHR018C	Argininosuccinate lyase	P04076	33.9609	34.097	34.2407	33.9799	9.11577	34.1333	34.1396	34.0613	34.0436	3.46913	-0.0248193	0.731339
ARG5,6	YER069W	Protein ARG5,6, mitochondrial;N-acetyl-gamma-glutamyl-phosphate reductase;Acetylglutamate kinase	Q01217	34.8588	34.7641	34.8372	34.9345	4.86359	34.7426	34.774	34.771	34.7678	2.10236	0.0847912	0.0555988
ARG7	YMR062C	Arginine biosynthesis bifunctional protein ArgJ, mitochondrial;Glutamate N-acetyltransferase;Amino-acid acetyltransferase;Arginine biosynthesis bifunctional protein ArgJ alpha chain;Arginine biosynthesis bifunctional protein ArgJ beta chain	Q04728	33.1264	33.1346	33.1521	33.1417	0.755744	33.4105	33.5077	33.4219	33.3334	4.60567	-0.279653	0.000242948
ARG8	YOL140W	Acetylornithine aminotransferase, mitochondrial	P18544	33.1828	33.0045	32.9817	33.1274	6.72208	33.1593	33.1567	33.16	33.1606	2.50931	-0.0850759	0.129004
ARG82	YDR173C	Inositol polyphosphate multikinase	P07250		24.1759	23.8851	26.9055	117.371	26.8683	24.6506	25.0636	24.9254	10.221	-0.388147	0.714433
ARH1	YDR376W	Probable NADPH:adrenodoxin oxidoreductase, mitochondrial	P48360	28.9603	28.4069	28.3272	28.6204	20.4963	28.6848	28.5164	28.6422	28.9674	9.73536	-0.124	0.494481
ARI1	YGL157W	NADPH-dependent aldehyde reductase ARI1	P53111	31.9954	32.0319	32.0723	32.1131	3.52591	31.9107	31.8582	32.0212	31.9049	4.03078	0.129417	0.0234731
ARK1	YNL020C	Actin-regulating kinase 1	P53974	25.0799	25.9223	25.4408	25.7486	24.5449	25.6486	26.1229	25.5965	25.5537	13.8509	-0.182512	0.452939
ARL1	YBR164C	ADP-ribosylation factor-like protein 1	P38116	28.6779	28.4815	28.5379	28.558	5.81842	28.4441	28.4488	28.4406	28.3976	5.21113	0.131058	0.0225951
ARL3	YPL051W	ADP-ribosylation factor-like protein 3	Q02804	27.7257	27.9176	28.6061	27.7274	32.2718	27.2537	27.8288	27.2066	27.8949	28.6794	0.448234	0.157744
ARN1	YHL040C	Siderophore iron transporter ARN1	P38731	24.7256	24.3118	24.7354	24.1866	19.2611	24.1077	23.9028	24.2737	24.1062	24.5623	0.392232	0.0500769
ARO1	YDR127W	Pentafunctional AROM polypeptide;3-dehydroquinate synthase;3-phosphoshikimate 1-carboxyvinyltransferase;Shikimate kinase;3-dehydroquinate dehydratase;Shikimate dehydrogenase	P08566	34.9867	34.8305	34.8687	34.8796	4.71476	34.8041	34.7104	34.8197	34.8519	3.83546	0.0948808	0.0806302
ARO10	YDR380W	Transaminated amino acid decarboxylase	Q06408	30.6266	30.6278	30.7553	30.6298	4.50504	30.6522	30.8838	30.8732	30.884	14.6801	-0.163448	0.0464397
ARO2	YGL148W	Chorismate synthase	P28777	33.4939	33.8442	33.8045	33.6928	10.5332	33.8438	33.7171	33.8175	33.609	8.16531	-0.037973	0.703077
ARO3	YDR035W	Phospho-2-dehydro-3-deoxyheptonate aldolase, phenylalanine-inhibited	P14843	32.1641	31.9466	32.0135	32.0971	6.59259	32.2654	32.2642	32.2346	32.1685	6.62325	-0.177852	0.0149817
ARO4	YBR249C	Phospho-2-dehydro-3-deoxyheptonate aldolase, tyrosine-inhibited	P32449	34.4736	34.3306	34.3886	34.4127	4.10467	34.417	34.342	34.4304	34.3878	4.20597	0.00708348	0.848357
ARO7	YPR060C	Chorismate mutase	P32178	29.3229	29.2258	29.184	29.4058	6.94594	29.6987	29.6732	29.6731	29.5848	12.4052	-0.372845	0.000538535
ARO8	YGL202W	Aromatic/aminoadipate aminotransferase 1	P53090	34.4818	34.5506	34.5756	34.5253	2.76341	34.6317	34.6328	34.5718	34.5092	3.7805	-0.0530577	0.18637
ARO9	YHR137W	Aromatic amino acid aminotransferase 2	P38840	32.1238	32.1577	32.1326	32.1793	1.74701	32.3245	32.3683	32.4121	32.2593	6.3279	-0.192685	0.00149138
ARP1	YHR129C	Centractin	P38696									22.2052
ARP2	YDL029W	Actin-related protein 2	P32381	31.8795	31.6525	31.5966	31.8378	9.53974	31.7683	31.8176	31.8445	31.7435	6.02286	-0.0518611	0.50276
ARP3	YJR065C	Actin-related protein 3	P47117	32.0894	31.725	31.7478	31.8801	11.9544	31.8902	31.7718	31.8376	31.929	7.81309	0.0034143	0.971051
ARP4	YJL081C	Actin-related protein 4	P80428	28.6868	28.4424	28.5053	28.3372	10.3422	28.4644	28.441	28.5467	28.6136	4.64722	-0.0234997	0.787347
ARP5	YNL059C	Actin-related protein 5	P53946	29.6766	29.521	29.7362	29.5814	6.65448	29.5326	29.7083	29.6271	29.7465	3.40874	-0.0248488	0.725405
ARP6	YLR085C	Actin-like protein ARP6	Q12509	25.149	26.7217	26.3864	25.7631	44.4789	26.5076	27.1621	26.7853	26.55	15.7818	-0.746183	0.0962436
ARP7	YPR034W	Actin-related protein 7	Q12406	29.0983	28.756	28.9487	28.9765	9.64434	28.988	28.8895	29.0685	29.0436	7.39083	-0.052537	0.54166
ARP8	YOR141C	Actin-like protein ARP8	Q12386	28.3944	28.861	28.7877	28.8142	13.8663	28.7771	28.8002	28.7857	28.5214	11.138	-0.00674807	0.959256
ARP9	YMR033W	Actin-like protein ARP9	Q05123	29.2808	28.8643	28.8477	28.9989	14.5303	29.081	29.0197	29.1173	29.2005	8.3787	-0.106703	0.35742
ART5	YGR068C	Arrestin-related trafficking adapter 5	P53244	25.2207	25.3713	25.1594	25.6109	14.3836	25.2534	25.4384	25.3004	25.4291	12.3805	-0.0147505	0.898326
ARX1	YDR101C	Probable metalloprotease ARX1	Q03862	31.487	31.6541	31.703	31.535	6.97459	31.5116	31.511	31.5485	31.4785	8.04734	0.082378	0.166598
ASC1	YMR116C	Guanine nucleotide-binding protein subunit beta-like protein	P38011	35.6054	35.4907	35.4858	35.4454	4.85015	35.4543	35.6866	35.5575	35.7343	4.94427	-0.101376	0.209653
ASF1	YJL115W	Histone chaperone ASF1	P32447	29.3108	29.5538	29.3421	29.4368	7.68962	29.3398	29.4913	29.395	29.4432	8.20739	-0.00644139	0.922604
ASG1	YIL130W	Activator of stress genes 1	P40467	28.8521	28.9757	28.858	28.9836	4.99205	29.1857	29.0296	29.02	28.9167	16.0829	-0.120642	0.117961
ASI2	YNL159C	Protein ASI2	P53895		23.2007	23.5267	23.9471	26.1262	22.8119	22.9427	22.3445	23.9047	30.3618	0.557195	0.249285
ASK1	YKL052C	DASH complex subunit ASK1	P35734	24.9613	25.1446	25.2978	25.1247	9.51377	24.4035	24.9977	25.1508	24.5677	21.2998	0.35215	0.111689
ASK10	YGR097W	Activator of SKN7 protein 10	P48361	29.7713	29.9626	29.945	29.8732	5.93011	29.7624	29.904	29.8111	29.637	5.08399	0.109441	0.17191
ASM4	YDL088C	Nucleoporin ASM4	Q05166	28.294	28.6723	28.5037	28.6951	12.4467	28.8724	28.7113	28.9119	28.6135	4.0903	-0.236	0.0883497
ASN1	YPR145W	Asparagine synthetase [glutamine-hydrolyzing] 1	P49089	34.4395	34.2037	34.2512	34.2871	7.23248	34.2442	34.2483	34.3075	34.5159	5.40681	-0.0335867	0.695605
ASN2	YGR124W	Asparagine synthetase [glutamine-hydrolyzing] 2	P49090	34.707	34.5296	34.4714	34.5162	7.39537	34.4999	34.5988	34.6583	34.6805	5.11694	-0.0533302	0.447925
ASP1	YDR321W	L-asparaginase 1	P38986	31.1019	31.4982	31.4499	31.3012	11.9911	31.4121	31.6881	31.4363	31.2068	6.7125	-0.0980211	0.488635
AST1	YBL069W	Protein AST1	P35183	27.5494	27.9908	27.8094	27.9209	12.8788	28.0985	28.0981	28.0255	27.8547	5.72483	-0.2016	0.123718
AST2	YER101C	Protein AST2	P39945	27.5813	27.5828	27.5529	27.6007	1.3672	27.8788	27.6727	27.6763	27.4063	9.9924	-0.0790865	0.447732
ATE1	YGL017W	Arginyl-tRNA--protein transferase 1	P16639	25.1161	24.7962	25.0231	24.9777	9.11177	25.0627	25.2317	25.1731	24.6829	10.9817	-0.0593459	0.687293
ATF2	YGR177C	Alcohol O-acetyltransferase 2	P53296	26.9383	26.567	26.1418	26.3711	24.0175	26.5263	26.0266	25.5813	25.6516	13.6113	0.558132	0.0882874
ATG1	YGL180W	Serine/threonine-protein kinase ATG1	P53104	28.3032	27.6536	27.8194	28.061	19.8679	28.0142	28.0131	28.0355	28.2657	63.8199	-0.122808	0.457286
ATG11	YPR049C	Autophagy-related protein 11	Q12527	26.7895	25.441	26.3816	25.1023	52.2993	26.089	25.5221	26.6865	25.6319	16.12	-0.0537076	0.913684
ATG13	YPR185W	Autophagy-related protein 13	Q06628	26.74	27.2869	27.1308	26.5672	22.898	27.0645	26.9061	26.4093	27.0271	3.43199	0.0795032	0.736466
ATG18	YFR021W	Autophagy-related protein 18	P43601	27.3519	27.4788	27.7229	27.6589	11.5943	27.5962	27.7245	27.5796	27.4369	7.64794	-0.031166	0.772639
ATG19	YOL082W	Autophagy-related protein 19	P35193	25.6934	24.3108	25.5745	23.9844	54.9164	24.0088	23.6264	24.2515	24.8412	26.083	0.708756	0.209229
ATG2	YNL242W	Autophagy-related protein 2	P53855	25.3607	25.0788	24.8024	25.3071	16.8975	25.2722	25.2487	24.8815	25.3056	34.7288	-0.0397553	0.813572
ATG20	YDL113C	Autophagy-related protein 20	Q07528	27.2697	27.3425	27.1157	27.1547	7.25695	27.12	26.7913	27.0382	27.3582	4.06634	0.143746	0.30439
ATG21	YPL100W	Autophagy-related protein 21	Q02887	26.9927	27.223	27.4022	27.1447	11.8766	27.1268	27.1703	27.1989	26.9389	11.7024	0.0819259	0.458156
ATG22	YCL038C	Autophagy-related protein 22	P25568		22.8532	23.0264	22.6567	12.7462	22.8775		22.97			-0.0782842	0.620164
ATG23	YLR431C	Autophagy-related protein 23	Q06671	25.5206	25.1012	25.1332	25.8647	25.8883		25.0846	26.3162	25.4078	33.5247	-0.197953	0.620291
ATG26	YLR189C	Sterol 3-beta-glucosyltransferase	Q06321	27.3157	26.6782	26.9393	26.9212	18.8286	27.1475	27.2275	26.8407	27.199	9.67597	-0.140106	0.412093
ATG27	YJL178C	Autophagy-related protein 27	P46989	29.0231	29.1869	29.2334	28.9412	9.44462	28.8658	29.0085	28.8288	28.634	7.13598	0.261842	0.0443204
ATG3	YNR007C	Autophagy-related protein 3	P40344	25.8364	26.1335	25.1281	25.4357	30.1894	25.7884	25.6218	25.3559	24.9745	13.6601	0.198295	0.510319
ATG33	YLR356W	Autophagy-related protein 33	Q06485	27.3312	27.6776	27.6699	27.7808	12.8294	27.2971	27.4402	27.291	27.2838	9.11625	0.286867	0.0338824
ATG4	YNL223W	Cysteine protease ATG4	P53867	25.084	24.5404	24.6051	24.935	18.1381	25.6647	25.0157	25.1222	25.2773	16.4619	-0.478839	0.0476186
ATG7	YHR171W	Ubiquitin-like modifier-activating enzyme ATG7	P38862	25.7931	25.6742	25.9104	25.9675	8.91221	25.554	25.583	25.5682	25.9878	21.5438	0.16306	0.235042
ATG8	YBL078C	Autophagy-related protein 8	P38182	24.4251	24.45	24.063	24.551	13.8935	24.6927	24.3608	24.3074	24.7943	9.13663	-0.166545	0.340527
ATG9	YDL149W	Autophagy-related protein 9	Q12142	25.2385	25.7403	25.7576	24.5416	34.8068	25.4185	25.7824	25.3553	25.4984	7.26327	-0.194178	0.542721
ATH1	YPR026W	Vacuolar acid trehalase	P48016	22.7261	23.3972	22.7818	22.7998	24.0562	24.0635	23.7399	23.1767	23.4383	10.5655	-0.678375	0.0339619
ATM1	YMR301C	Iron-sulfur clusters transporter ATM1, mitochondrial	P40416	27.8421	27.4587	27.5019	27.8053	13.7661	27.9099	27.757	27.8501	27.901	7.49983	-0.202554	0.103989
ATO3	YDR384C	Ammonia transport outward protein 3	Q12359	26.7854	27.2589	27.4344	27.4493	19.6155	27.0147	26.7332	27.0973	26.8086	21.6759	0.318579	0.121937
ATP1	YBL099W	ATP synthase subunit alpha, mitochondrial	P07251	34.3122	34.4751	34.4668	34.4549	5.20931	34.5458	34.5523	34.5675	34.4463	4.00946	-0.100721	0.0779522
ATP10	YLR393W	Mitochondrial ATPase complex subunit ATP10	P18496	26.9827	26.5772	26.9771	26.7221	13.584	26.868	27.0551	26.8633	27.4032	13.6269	-0.23261	0.199439
ATP11	YNL315C	Protein ATP11, mitochondrial	P32453	27.1813	26.6886	27.1728	27.0641	14.9341	26.9612	27.0238	27.1054	26.9276	16.1293	0.0222047	0.861839
ATP12	YJL180C	Protein ATP12, mitochondrial	P22135	26.3752	26.0734	25.8604	26.195	14.8455	26.0669	26.3306	26.2545	26.1632	20.5937	-0.0778048	0.547859
ATP14	YLR295C	ATP synthase subunit H, mitochondrial	Q12349	27.9803	27.4872	28.2804	28.0823	21.7191	28.6799	28.4753	28.5649	28.5787	21.7004	-0.617124	0.0120663
ATP15	YPL271W	ATP synthase subunit epsilon, mitochondrial	P21306	26.2167	26.4158	26.7838	26.2623	18.8897	26.9741	27.1681	27.0852	26.7229	14.5009	-0.567895	0.0123991
ATP16	YDL004W	ATP synthase subunit delta, mitochondrial	Q12165	29.5659	29.3747	29.2938	29.7478	14.2976	30.3776	29.6343	29.7676	29.9262	23.0211	-0.430892	0.0649588
ATP17	YDR377W	ATP synthase subunit f, mitochondrial	Q06405	27.9775	28.5316	28.8254	27.943	30.2657	29.168	29.2403	29.1508	29.222	6.54884	-0.87591	0.00683016
ATP2	YJR121W	ATP synthase subunit beta, mitochondrial	P00830	34.4685	34.2672	34.2157	34.3966	8.06074	34.2958	34.3068	34.4066	34.2503	6.27216	0.0221447	0.751276
ATP20	YPR020W	ATP synthase subunit g, mitochondrial	Q12233	25.2116	25.0891	24.3918	25.0391	22.5848	25.4675	25.2696	25.619	25.9552	44.454	-0.644919	0.0330537
ATP25	YMR098C	ATPase synthesis protein 25, mitochondrial	Q03153	24.3869	24.2445	23.9011	23.8679	17.8233		24.4205	24.2002	25.1109	29.2057	-0.477095	0.14326
ATP3	YBR039W	ATP synthase subunit gamma, mitochondrial	P38077	30.4153	30.489	30.346	30.3301	5.08733	30.5644	30.4361	30.4904	30.2324	4.54025	-0.0356914	0.670854
ATP4	YPL078C	ATP synthase subunit 4, mitochondrial	P05626	30.4284	30.4124	30.6223	30.3889	7.69917	30.6384	30.4154	30.6539	30.44	7.50058	-0.073905	0.407762
ATP5	YDR298C	ATP synthase subunit 5, mitochondrial	P09457	30.0255	29.7905	29.9124	29.8201	7.44406	30.1503	30.0909	30.1926	30.2355	12.4251	-0.280189	0.00379583
ATP7	YKL016C	ATP synthase subunit d, mitochondrial	P30902	28.5577	28.4244	28.5735	28.4037	6.10271	28.9165	28.7983	28.9827	28.5958	15.7605	-0.333512	0.0130261
ATX1	YNL259C	Metal homeostasis factor ATX1	P38636	27.6494	27.591	27.616	27.7516	4.97036	28.276	28.2396	28.1108	27.9427	7.71481	-0.490308	0.0010608
AUR1	YKL004W	Inositol phosphorylceramide synthase catalytic subunit AUR1	P36107	25.4857	25.7898	26.1521	25.5149	22.5154	25.4204	25.8325	25.1718	25.5271	12.4466	0.247688	0.275819
AVL9	YLR114C	Late secretory pathway protein AVL9	Q12500	28.2331	28.1346	28.1867	28.3338	5.93299	28.4319	28.176	28.4213	28.3916	12.9586	-0.133162	0.120833
AVO1	YOL078W	Target of rapamycin complex 2 subunit AVO1	Q08236	25.2718	25.8475	26.4208	25.5861	35.3588	25.7402	25.6218	25.5131	24.9819	17.8826	0.317308	0.324023
AVT1	YJR001W	Vacuolar amino acid transporter 1	P47082	28.5463	28.1918	28.4099	28.2721	10.919	28.0793	28.2739	28.211	28.1919	4.78279	0.166023	0.108011
AVT3	YKL146W	Vacuolar amino acid transporter 3	P36062	26.1486	26.6213	26.7768	26.2553	20.5548	26.4581	26.7837	26.1772	26.5134	8.50606	-0.0325838	0.871958
AVT4	YNL101W	Vacuolar amino acid transporter 4	P50944	25.681	26.0352	25.6714	25.0882	25.5811	25.6579	25.1981	25.5204	25.2225	21.9022	0.219235	0.370213
AVT7	YIL088C	Vacuolar amino acid transporter 7	P40501	23.8171	23.6469	23.4713	23.5834	10.1499	23.5217	22.8391	23.5334	23.7673	27.9519	0.214323	0.352899
AXL2	YIL140W	Axial budding pattern protein 2	P38928	23.3124	25.0217	23.7109	24.5895	52.0238	24.8205	24.089	23.831	24.0812	27.3628	-0.0467958	0.919982
AYR1	YIL124W	NADPH-dependent 1-acyldihydroxyacetone phosphate reductase	P40471	30.6314	30.5871	30.4304	30.596	6.0228	30.6271	30.5405	30.5893	30.6818	5.55316	-0.0484251	0.402016
AZF1	YOR113W	Asparagine-rich zinc finger protein AZF1	P41696	26.9588	26.3077	26.35	26.1143	27.5823	26.5919	26.7096	26.835	26.5253	7.74368	-0.232739	0.277742
BAP2	YBR068C	Leu/Val/Ile amino-acid permease	P38084	27.6378	28.1757	28.1042	28.0177	15.4944	27.9991	28.2578	27.9209	27.5652	9.37027	0.0481059	0.805084
BAS1	YKR099W	Myb-like DNA-binding protein BAS1	P22035	26.2085	26.6849	26.3111	26.3809	14.8363	26.4426	26.5687	26.5591	26.3206	20.3934	-0.0764256	0.540747
BAT1	YHR208W	Branched-chain-amino-acid aminotransferase, mitochondrial	P38891	34.8601	34.6503	34.6589	34.7154	6.89525	34.8006	34.7507	34.8164	34.8836	4.59864	-0.0916583	0.151204
BAT2	YJR148W	Branched-chain-amino-acid aminotransferase, cytosolic	P47176	31.8985	31.8431	31.9718	31.9019	3.66964	31.9057	31.9101	32.0352	31.9133	2.94663	-0.0372674	0.398602
BBC1	YJL020C	Myosin tail region-interacting protein MTI1	P47068	32.363	32.4097	32.3548	32.2842	3.56781	32.3837	32.2171	32.3206	32.2925	2.19313	0.0494238	0.295743
BCD1	YHR040W	Box C/D snoRNA protein 1	P38772	24.8441	25.1964	25.0178	24.9819	10.1528	25.2731	24.7727	25.4367	24.963	15.5748	-0.101339	0.564583
BCH1	YMR237W	Protein BCH1	Q05029	29.5121	29.6526	29.6058	29.6709	4.84809	29.7759	29.7043	29.629	29.6023	4.6727	-0.0675394	0.248489
BCH2	YKR027W	Protein BCH2	P36122	25.1007	25.6262	25.4651	25.2067	16.6758	25.4564	25.3768	25.1264	25.0197	11.9621	0.104845	0.531337
BCK1	YJL095W	Serine/threonine-protein kinase BCK1/SLK1/SSP31	Q01389	26.1969	26.81	26.5872	26.2189	20.9591	26.5861	26.8363	26.6472	26.2399	11.2533	-0.124084	0.546127
BCK2	YER167W	Protein BCK2	P33306	22.7936	23.0254	23.1022	24.1229	46.9107	23.8861	23.5387	23.0054	23.043	18.1571	-0.10728	0.77724
BCP1	YDR361C	Protein BCP1	Q06338	29.7276	29.6825	29.9227	29.7597	7.43809	29.4842	29.9385	29.6236	29.4205	2.6284	0.156431	0.262891
BCS1	YDR375C	Mitochondrial chaperone BCS1	P32839	27.3846	27.2566	26.8441	27.4686	17.8321	27.5307	26.9949	27.1822	27.0268	11.0115	0.0548444	0.776932
BCY1	YIL033C	cAMP-dependent protein kinase regulatory subunit	P07278	31.4875	31.5198	31.5668	31.4519	3.39294	31.5081	31.5529	31.4727	31.5827	1.52728	-0.0226158	0.535493
BDF1	YLR399C	Bromodomain-containing factor 1	P35817	29.3216	29.5798	29.6013	29.3478	10.2559	29.7282	29.8011	29.633	29.5451	9.95489	-0.214243	0.0604277
BDF2	YDL070W	Bromodomain-containing factor 2	Q07442	23.9104	24.2516	23.8817	24.014	12.1011	24.716	24.2392	24.9357	25.081	27.0351	-0.728568	0.0113238
BDH1	YAL060W	(R,R)-butanediol dehydrogenase	P39714	31.8305	31.9799	31.8722	31.8629	4.57202	31.9899	32	31.9629	31.8819	3.50847	-0.0722723	0.136495
BDP1	YNL039W	Transcription factor TFIIIB component B	P46678	27.3305	27.727	27.7157	27.7616	13.0988	27.8424	27.8179	27.7811	27.4619	7.3154	-0.0921068	0.520362
BEM1	YBR200W	Bud emergence protein 1	P29366	27.3093	27.5143	27.5071	27.326	7.72807	27.4118	27.3216	27.3884	27.2151	7.2105	0.079955	0.30398
BEM2	YER155C	GTPase-activating protein BEM2/IPL2	P39960	30.7545	30.7975	30.7943	30.7291	2.27668	30.8128	30.7665	30.8316	30.8329	2.6649	-0.042125	0.111885
BEM3	YPL115C	GTPase-activating protein BEM3	P32873	28.0831	28.2997	28.0826	28.2225	7.51173	28.1903	28.1964	28.1685	28.2569	10.8728	-0.0310508	0.60586
BEM4	YPL161C	Bud emergence protein 4	P39011	26.105	25.5993	26.1401	25.9075	16.2992	25.9999	25.4637	25.7002	25.5731	26.7071	0.253753	0.18526
BER1	YLR412W	SRR1-like protein BER1	Q06688	24.4798	24.7678	25.4674	25.3836	31.7443	25.1305	24.8402	25.3011	25.2726	10.9575	-0.11142	0.685008
BET1	YIL004C	Protein transport protein BET1	P22804	26.388	26.7818	27.0092	26.8945	17.5267	26.7362	27.1367	26.5726	26.4772	14.0142	0.0376935	0.855662
BET3	YKR068C	Trafficking protein particle complex subunit BET3	P36149	26.5769	25.5634	25.3601	26.1483	38.9112	26.1551	25.9254	26.1629	26.2418	32.9659	-0.20914	0.491789
BET4	YJL031C	Geranylgeranyl transferase type-2 subunit alpha	Q00618	28.5208	28.3673	28.4993	28.1581	11.149	28.3311	28.6149	28.2583	28.4346	3.78748	-0.0233402	0.844132
BET5	YML077W	Trafficking protein particle complex subunit BET5	Q03630	23.2355	23.4206	23.1923	22.9732	12.6185	22.8808	22.9953	22.0665		25.0177	0.557839	0.0916121
BFA1	YJR053W	Mitotic check point protein BFA1	P47113		27.2696	27.1265		7.00869	26.9264	27.2351	27.406	26.3971	13.2433	0.206952	0.570305
BFR1	YOR198C	Nuclear segregation protein BFR1	P38934	34.5262	34.8463	34.841	34.728	10.0164	34.8859	34.9844	34.8698	34.7664	8.27676	-0.141245	0.156238
BFR2	YDR299W	Protein BFR2	Q06631	30.3983	30.3844	30.5095	30.4313	3.92932	30.4321	30.6052	30.4418	30.4794	3.25823	-0.0587849	0.272812
BGL2	YGR282C	Glucan 1,3-beta-glucosidase	P15703	33.6566	33.5649	33.5749	33.581	2.95265	33.6318	33.5135	33.5483	33.809	8.93704	-0.0313071	0.667047
BIG1	YHR101C	Protein BIG1	P38813	24.873	25.4795	25.7413	25.435	23.4356	25.1888	25.8664	24.9534	25.0676	44.5514	0.113148	0.694493
BIK1	YCL029C	Nuclear fusion protein BIK1	P11709	27.2698	27.2959	27.4947	27.3031	7.41683	27.3268	27.5185	27.4281	27.2629	15.8658	-0.0431838	0.592617
BIM1	YER016W	Protein BIM1	P40013	27.6882	27.6164	27.7368	27.8111	5.68072	27.8797	27.6672	27.5003	27.8231	5.21352	-0.00446408	0.963881
BIO2	YGR286C	Biotin synthase, mitochondrial	P32451	26.5341	26.1664	26.7423	26.3327	17.3694	26.6652	26.7356	26.628	27.0659	24.4229	-0.329789	0.0845916
BIO4	YNR057C	Dethiobiotin synthetase	P53630	22.8875			22.7722	5.64836	22.7669	23.5413	23.0809	22.8226	32.754	-0.223083	0.45078
BIT61	YJL058C	Target of rapamycin complex 2 subunit BIT61	P47041	24.1073	24.8608	24.7909	24.855	22.1386	24.4225	24.9031	24.4863	24.0185	14.3731	0.19588	0.475232
BLM10	YFL007W	Proteasome activator BLM10	P43583	30.0527	29.8936	30.1991	29.8246	11.7544	29.9406	29.9317	29.7775	29.9088	1.81313	0.102816	0.306519
BMH1	YER177W	Protein BMH1	P29311	33.6627	33.7423	33.9487	34.0701	12.9955	34.0966	34.08	34.0727	33.7817	4.66504	-0.151788	0.253269
BMH2	YDR099W	Protein BMH2	P34730	30.326	30.5533	30.4815	30.7392	11.9617	30.9892	30.5103	30.7332	30.5261	11.9927	-0.164685	0.287267
BMS1	YPL217C	Ribosome biogenesis protein BMS1	Q08965	30.036	30.1443	30.2239	30.1593	5.34425	30.2309	30.1089	30.2836	30.1397	7.27615	-0.049877	0.408283
BMT5	YIL096C	25S rRNA (uridine(2634)-N(3))-methyltransferase	P40493		27.9586	29.6007	27.2838	85.0237	27.7849	27.1422	26.9572	26.903	44.8802	1.08426	0.142545
BMT6	YLR063W	25S rRNA (uridine(2843)-N(3))-methyltransferase	Q12291	25.7459	25.8199	25.9149	25.4667	12.801	25.7735	25.9354	26.0436	25.5727	5.58467	-0.0944375	0.527279
BNA1	YJR025C	3-hydroxyanthranilate 3,4-dioxygenase	P47096	31.5895	31.1076	31.2848	31.3103	14.1491	31.3455	31.3469	31.3559	31.5963	6.5719	-0.0880943	0.480649
BNA2	YJR078W	Indoleamine 2,3-dioxygenase	P47125		22.4353	22.7803	22.3146	17.2647	22.1465	22.0556			9.00888	0.408993	0.111852
BNA3	YJL060W	Probable kynurenine--oxoglutarate transaminase BNA3	P47039	29.9176	29.6222	29.3756	29.7258	15.4233	29.6979	29.534	29.6896	29.8652	1.70067	-0.0364055	0.791349
BNA4	YBL098W	Kynurenine 3-monooxygenase	P38169	27.6897	27.6499	27.4113	27.5722	8.3116	27.755	27.7774	27.5023	27.5379	7.10744	-0.0623814	0.533101
BNA5	YLR231C	Kynureninase	Q05979	30.4374	30.2805	30.1579	30.3928	8.53567	30.4235	30.2069	30.4091	30.4297	4.26394	-0.0501606	0.56493
BNA6	YFR047C	Nicotinate-nucleotide pyrophosphorylase [carboxylating]	P43619	30.3305	30.3381	30.4017	30.1499	7.29622	30.2898	30.4566	30.1263	30.2971	3.76161	0.012599	0.888931
BNA7	YDR428C	Kynurenine formamidase	Q04066	26.8419	26.487	27.1569	26.7879	19.0615	27.2394	27.1727	27.0804	26.9555	22.6364	-0.293542	0.0987444
BNI1	YNL271C	Protein BNI1	P41832	28.7186	28.8643	28.7964	28.7351	4.62915	28.8534	28.8391	28.6592	28.7354	8.03901	0.00684051	0.907615
BNI4	YNL233W	Protein BNI4	P53858	27.5368	27.4283	27.5022	27.6176	5.4549	27.3646	27.4321	27.5675	27.617	5.52462	0.0259171	0.725767
BNI5	YNL166C	Bud neck protein 5	P53890	28.3576	28.659	28.5338	28.5842	8.67006	28.4921	28.5676	28.4656	28.2999	5.4194	0.0773533	0.399965
BOI1	YBL085W	Protein BOB1	P38041	27.2903	27.719	27.5647	27.43	12.7391	27.5132	27.4097	27.6173	27.2628	7.75194	0.0502402	0.687407
BOI2	YER114C	Protein BOI2	P39969	28.527	28.3081	28.6061	28.2817	11.1502	28.5096	28.3865	28.305	28.4578	6.7103	0.0160234	0.867063
BOP3	YNL042W	Protein BOP3	P53958	25.2855	25.7034	25.5375	25.4603	11.9912	25.9024	25.4799	25.5408	25.3218	21.1062	-0.064571	0.682485
BOS1	YLR078C	Protein transport protein BOS1	P25385	29.049	28.6414	28.7136	28.7723	12.8923	28.9019	28.8247	28.8468	29.0309	6.74202	-0.10699	0.327377
BPH1	YCR032W	Beige protein homolog 1	P25356	26.1519	25.4982		24.966	41.1125	25.4573	25.3878	25.6634	25.5836	28.2124	0.0156746	0.959833
BPL1	YDL141W	Biotin--protein ligase;Biotin--[methylmalonyl-CoA-carboxytransferase] ligase;Biotin--[propionyl-CoA-carboxylase [ATP-hydrolyzing]] ligase;Biotin--[methylcrotonoyl-CoA-carboxylase] ligase;Biotin--[acetyl-CoA-carboxylase] ligase	P48445	28.6902	28.8811	28.9037	28.7674	6.87489	28.6507	28.6587	28.6209	28.9022	4.1349	0.102458	0.258987
BPT1	YLL015W	Bile pigment transporter 1	P14772	28.2455	27.9752	28.079	28.0265	8.32832	28.1373	28.1904	28.0217	27.9757	7.69175	0.000288285	0.99713
BRE1	YDL074C	E3 ubiquitin-protein ligase BRE1	Q07457	28.5135	28.5786	28.8145	28.7735	10.1103	28.6052	28.7773	28.6573	28.5287	6.0994	0.0278941	0.767066
BRE2	YLR015W	COMPASS component BRE2	P43132	26.2199	26.0465	26.2191	26.3636	8.92212	26.1897	26.047	26.3732	26.263	10.9057	-0.0059359	0.951837
BRE5	YNR051C	UBP3-associated protein BRE5	P53741	30.0214	30.4566	30.4357	30.2801	13.3059	30.2808	30.1984	30.2772	30.055	9.80423	0.095585	0.431731
BRF1	YGR246C	Transcription factor IIIB 70 kDa subunit	P29056	25.2407	25.778	25.8198	25.816	17.6607	25.897	25.3992	25.7922	25.8025	12.8521	-0.0591377	0.752741
BRL1	YHR036W	Nucleus export protein BRL1	P38770	24.7639	24.6959	25.3268	24.9628	20.6654	24.8735	25.5306	25.2903	25.101	16.6662	-0.261514	0.236497
BRN1	YBL097W	Condensin complex subunit 2	P38170	26.6078	26.061	26.246	26.2355	16.6255	26.1631	26.6749	26.6355	26.627	16.4848	-0.237546	0.204561
BRO1	YPL084W	Vacuolar-sorting protein BRO1	P48582	29.7536	29.7301	29.7351	29.7042	1.4077	29.6205	29.6684	29.5852	29.604	10.5557	0.111212	0.00163544
BRR1	YPR057W	Pre-mRNA-splicing factor BRR1	Q99177	24.1069	24.14	24.2426	24.081	4.99242	24.2172	24.2201	24.716	24.3516	19.2311	-0.233628	0.105666
BRR2	YER172C	Pre-mRNA-splicing helicase BRR2	P32639	29.6433	29.6259	29.6759	29.9067	9.44111	29.8583	29.6993	29.8157	30.002	6.06671	-0.130865	0.198189
BRX1	YOL077C	Ribosome biogenesis protein BRX1	Q08235	30.4174	30.3517	30.4162	30.2202	6.27485	30.1927	30.4564	30.3384	30.3796	4.43312	0.00960276	0.898547
BSP1	YPR171W	Protein BSP1	Q06604	28.0448	28.4431	28.5007	28.2889	13.5869	28.4234	28.4472	28.2702	28.4015	8.93586	-0.0662074	0.566752
BTS1	YPL069C	Geranylgeranyl pyrophosphate synthase	Q12051	23.2829	22.8127	22.6173	23.1822	21.1667	22.943	23.1744	23.0713	23.2741	7.30941	-0.141914	0.439281
BUB3	YOR026W	Cell cycle arrest protein BUB3	P26449	23.9772	24.2469	23.9312	24.0572	9.93469	24.3342	23.8704	24.2292	24.5243	27.9037	-0.186377	0.271688
BUD13	YGL174W	Pre-mRNA-splicing factor CWC26	P46947	25.8781	25.8805	26.2069	25.9744	11.1453	26.0155	25.8452	25.9739	25.6152	7.56803	0.122501	0.341694
BUD14	YAR014C	Bud site selection protein 14	P27637	28.9433	28.8367	29.0353	28.7448	8.74821	28.9152	29.0331	28.9134	28.9776	4.59492	-0.0698252	0.352865
BUD16	YEL029C	Putative pyridoxal kinase BUD16	P39988	27.2658	27.5703	27.6091	27.3614	11.3231	27.256	27.3652	27.28	27.4949	10.1619	0.102637	0.337718
BUD17	YNR027W	Putative pyridoxal kinase BUD17	P53727	26.0229	25.3576	25.3312	25.5104	24.2108	25.5239	24.4322	24.6315	25.8345	20.5979	0.450013	0.276238
BUD2	YKL092C	Inhibitory regulator protein BUD2/CLA2	P33314	25.7002	25.6541	26.3664	26.94	44.169	26.3303	26.2495	26.2147	26.3897	24.5198	-0.130883	0.685517
BUD20	YLR074C	Bud site selection protein 20	Q08004	26.0276	26.1868	26.4862	26.5843	17.6733	26.5034	26.4154	27.1588	26.3578	12.6248	-0.28764	0.250867
BUD21	YOR078W	Bud site selection protein 21	Q08492	27.4143	27.8016	27.7246	27.5792	11.6175	27.527	27.4748	27.5987	27.2903	7.12405	0.157228	0.195151
BUD22	YMR014W	Bud site selection protein 22	Q04347	26.882	26.5394	26.2823	26.6517	17.133	26.2997	26.1651	26.2952	27.0035	19.6005	0.147978	0.539153
BUD23	YCR047C	18S rRNA (guanine(1575)-N(7))-methyltransferase	P25627	27.3463	27.3327	27.1126	27.1925	7.75508	27.5853	27.361	27.4758	27.4668	5.3037	-0.226178	0.0208223
BUD27	YFL023W	Bud site selection protein 27	P43573	28.2662	28.3315	28.302	28.0459	8.63732	28.2723	28.1455	28.1304	28.1384	5.38491	0.0647457	0.409983
BUD3	YCL014W	Bud site selection protein 3	P25558	27.5519	27.5732	27.5809	27.7705	7.27851	28.1015	27.8165	27.9627	27.7247	5.77387	-0.28224	0.0271376
BUD32	YGR262C	EKC/KEOPS complex subunit BUD32	P53323	27.8547	27.7629	27.7177	27.8525	4.68875	28.0113	27.5422	27.7169	27.8157	7.4902	0.0254013	0.814521
BUD4	YJR092W	Bud site selection protein 4	P47136	29.1588	29.2139	29.2075	29.3285	5.06095	29.2609	29.2201	29.3346	29.3965	11.7829	-0.0758874	0.20322
BUD6	YLR319C	Bud site selection protein 6	P41697	28.1245	28.0116	28.0762	27.9459	5.36498	28.0622	28.1033	28.0124	28.108	8.87381	-0.0319318	0.5023
BUD7	YOR299W	Bud site selection protein 7	Q08754	26.0087	26.7081	25.9297	26.0683	27.4178	26.4561	26.1951	26.413	25.6893	11.33	-0.00970045	0.970397
BUG1	YDL099W	Binder of USO1 and GRH1 protein 1	Q12191	26.9062	27.0308	26.8923	27.2744	12.7563	27.1647	27.2989	27.1892	26.967	3.47873	-0.129023	0.294263
BUL1	YMR275C	Ubiquitin ligase-binding protein BUL1	P48524	28.8651	28.9423	28.9488	28.8785	2.98031	28.8759	28.9056	29.0004	28.8439	4.61086	0.00224666	0.957064
BUL2	YML111W	Ubiquitin ligase-binding protein BUL2	Q03758	27.7211	27.7081	27.6562	27.8256	4.98563	27.5397	27.7355	27.6325	27.5552	2.59608	0.112012	0.0977463
BUR2	YLR226W	Protein BUR2	Q05949	27.8899	27.6452	27.9807	27.6818	11.2646	27.7466	27.5519	27.8406	27.6871	4.86007	0.0928169	0.393754
BUR6	YER159C	Negative cofactor 2 complex subunit alpha	P40096	26.0786	25.5038	26.1039	25.914	17.788	26.2364	26.5327	26.461	26.2287	20.2048	-0.46463	0.0265047
BYE1	YKL005C	Transcription factor BYE1	P36106	31.845	31.6949	31.7491	31.8218	4.73605	31.4689	31.9744	32.0623	31.7211	9.06017	-0.0289949	0.840701
BZZ1	YHR114W	Protein BZZ1	P38822	29.8655	29.6869	29.6426	29.9064	8.99596	30.0226	29.7883	29.9227	29.9457	4.83029	-0.144453	0.125899
CAB1	YDR531W	Pantothenate kinase CAB1	Q04430	28.7728	28.8539	28.8455	28.8697	2.94058	28.7019	28.5195	28.6639	28.6193	13.2394	0.209319	0.00343274
CAB2	YIL083C	Phosphopantothenate--cysteine ligase CAB2	P40506	29.7909	29.3265	29.5856	29.5976	12.982	29.5116	29.4626	29.4125	29.5255	5.06585	0.0971211	0.363123
CAB3	YKL088W	Coenzyme A biosynthesis protein 3	P36076	28.734	28.8689	28.7321	28.6708	5.89871	28.7015	28.6604	28.7125	28.4854	4.93614	0.11148	0.148678
CAB4	YGR277C	Phosphopantetheine adenylyltransferase	P53332	27.9369	28.1576	28.31	27.8327	14.9787	27.9036	27.7563	28.1479	28.4128	16.603	0.00418824	0.982164
CAB5	YDR196C	Dephospho-CoA kinase CAB5	Q03941	25.8981	26.0614	26.2222	26.3677	13.967	26.4007	26.3683	26.2022	25.8968	18.1061	-0.0796519	0.622336
CAC2	YML102W	Chromatin assembly factor 1 subunit p60	Q04199	27.065	27.2868	26.8761	27.1821	11.9652	26.9388	27.3293	27.0339	27.114	1.78487	-0.00149833	0.990531
CAF120	YNL278W	CCR4-NOT transcriptional complex subunit CAF120	P53836	25.4356	25.7252	25.4963	25.3442	11.6062	25.6543	25.6431	25.8372	25.3698	13.5448	-0.125791	0.35662
CAF130	YGR134W	Protein CAF130	P53280	25.4852	25.0355	25.0076	24.9947	17.6965	25.1881	24.7699	24.6529	24.5923	12.4823	0.32992	0.11495
CAF16	YFL028C	CCR4-associated factor 16	P43569	29.5129	29.3081	29.2976	29.476	7.74688	29.4954	29.6423	29.5758	29.6763	12.9911	-0.198761	0.0275246
CAF20	YOR276W	Cap-associated protein CAF20	P12962	31.4086	31.4223	31.6621	31.6408	9.45305	31.5159	31.6013	31.4018	31.3138	10.3694	0.0752743	0.449343
CAF4	YKR036C	CCR4-associated factor 4	P36130	26.7614	26.4722	26.3904	26.6637	11.8184	26.4534	26.6116	26.7317	26.6464	15.5528	-0.038847	0.719623
CAF40	YNL288W	Protein CAF40	P53829	25.4985	25.1944	25.2974	25.9368	24.2006	24.7951	25.7859	25.0945	25.3583	16.7673	0.223364	0.434408
CAJ1	YER048C	Protein CAJ1	P39101	30.9839	30.4935	30.893	30.3881	20.0919	30.2163	30.3685	30.3204	30.4327	7.33083	0.355171	0.0598098
CAK1	YFL029C	Serine/threonine-protein kinase CAK1	P43568	27.1097	27.0302	26.7197	26.7532	13.5655	26.8038	27.1947	26.7674	27.0478	13.4869	-0.050213	0.734207
CAM1	YPL048W	Elongation factor 1-gamma 1	P29547	33.5782	33.658	33.667	33.534	4.4239	33.6779	33.5092	33.6201	33.4474	3.47234	0.0456623	0.484275
CAN1	YEL063C	Arginine permease	P04817	27.4529	27.4613	27.8184	27.4135	13.9063	26.9123	27.3702	27.2566	26.4132	41.9938	0.548459	0.0581702
CAP1	YKL007W	F-actin-capping protein subunit alpha	P28495	30.294	30.4406	30.7098	30.4494	12.3201	30.4174	30.6257	30.3804	30.4382	11.4206	0.00802573	0.940046
CAP2	YIL034C	F-actin-capping protein subunit beta	P13517	30.6713	30.6978	30.7808	30.7774	3.85147	30.6835	30.7446	30.6488	30.8395	4.28682	0.00268348	0.959115
CAR1	YPL111W	Arginase	P00812	31.7331	31.7566	31.8442	31.7099	4.12359	31.5783	31.9464	31.8067	31.858	13.6343	-0.036362	0.679539
CAR2	YLR438W	Ornithine aminotransferase	P07991	31.1385	30.9789	31.2695	30.9665	10.1263	31.095	31.063	30.9479	31.1221	4.45204	0.0313545	0.713855
CAT2	YML042W	Carnitine O-acetyltransferase, mitochondrial	P32796-2	25.7107	25.0116	24.9733	25.7539	29.0278	25.9845	25.31	25.633		73.4337	-0.280128	0.394766
CAT5	YOR125C	Catabolite repression protein CAT5	P41735	24.7866	23.4499	24.6067	23.3077	49.9714	23.3818	23.8805	23.5388	22.8307	73.3585	0.629736	0.203517
CBC2	YPL178W	Nuclear cap-binding protein subunit 2	Q08920	29.2859	29.5506	29.4709	29.3277	8.58444	29.3703	29.5992	29.3374	29.44	6.62621	-0.0279885	0.752644
CBF1	YJR060W	Centromere-binding protein 1	P17106	29.5989	29.7041	29.6564	29.7099	3.54103	29.7149	29.8056	29.6441	29.7049	7.33291	-0.05003	0.279689
CBF2	YGR140W	Centromere DNA-binding protein complex CBF3 subunit A	P32504	24.3948	24.1579	24.0555	23.9764	13.0013	24.8615	24.605	24.4554	23.1278	14.0391	-0.116258	0.779977
CBF5	YLR175W	H/ACA ribonucleoprotein complex subunit 4	P33322	32.9088	32.6878	32.7806	32.7257	6.8184	32.6962	32.6127	32.7122	32.7513	1.54495	0.0826254	0.193442
CBK1	YNL161W	Serine/threonine-protein kinase CBK1	P53894	28.537	28.6473	28.5956	28.6224	3.25787	28.6799	28.6566	28.7445	28.6718	4.95298	-0.0875898	0.0287255
CBP2	YHL038C	Cytochrome B pre-mRNA-processing protein 2	P03874	25.9063	25.5203	25.2374	25.8889	21.3203	25.7419	25.8247	26.1863	25.7663	16.9319	-0.241574	0.253023
CBP3	YPL215W	Protein CBP3, mitochondrial	P21560	28.2099	28.0745	28.3355	27.9043	12.6797	28.0717	28.1477	28.2278	28.4223	3.72629	-0.0863393	0.496535
CBP4	YGR174C	Assembly factor CBP4	P37267	25.1439	24.9137	24.9425	24.7224	11.9795	25.6633	25.4092	25.3535	25.6573	20.8861	-0.590198	0.00250377
CBR1	YIL043C	NADH-cytochrome b5 reductase 1	P38626	32.6671	32.6639	32.74	32.5457	5.5091	32.4573	32.6502	32.5793	32.5013	5.30446	0.107155	0.117216
CBS2	YDR197W	Cytochrome B translational activator protein CBS2	P14905	23.1991	22.6522		22.9508	18.7307	23.1625	22.527	23.6618	23.1718	25.2321	-0.196726	0.547762
CCA1	YER168C	CCA tRNA nucleotidyltransferase, mitochondrial	P21269-2	29.3394	29.0891	29.1587	29.28	7.85347	29.2734	29.3654	29.3036	29.3912	2.0775	-0.116584	0.113513
CCC1	YLR220W	Protein CCC1	P47818	27.6561	28.1437	27.7556	27.8875	15.0941	28.0104	28.0014	27.9972	27.5424	10.206	-0.0270874	0.868067
CCC2	YDR270W	Copper-transporting ATPase	P38995	27.7061	27.3163	27.2992	27.3998	13.8055	27.0521	27.0634	27.1239	27.0055	2.58515	0.369145	0.00915275
CCL1	YPR025C	Cyclin CCL1	P37366	25.6122	26.4874	25.8935	24.9849	42.445	25.0782	25.3495	25.1356	25.1983	9.75149	0.554083	0.131551
CCM1	YGR150C	Mitochondrial group I intron splicing factor CCM1	P48237	25.8033	25.7286	26.7933	26.4102	35.8136	26.1369	26.2627	25.5837	25.7135	4.40331	0.259666	0.422993
CCP1	YKR066C	Cytochrome c peroxidase, mitochondrial	P00431	30.6902	30.4983	30.6177	30.4109	8.56789	30.6718	30.7826	30.6014	30.678	5.36892	-0.129163	0.124699
CCR4	YAL021C	Glucose-repressible alcohol dehydrogenase transcriptional effector	P31384	29.3553	29.6988	29.7458	29.7397	12.1739	29.6557	29.7851	29.6406	29.5837	7.08595	-0.0313721	0.770914
CCS1	YMR038C	Superoxide dismutase 1 copper chaperone	P40202	31.5358	31.6403	31.6238	31.7713	6.80959	31.7753	31.7768	31.7303	31.7422	4.91411	-0.113353	0.0639234
CCT2	YIL142W	T-complex protein 1 subunit beta	P39076	32.9508	32.6613	32.8485	32.7816	8.3759	32.7282	32.7432	32.822	32.8397	4.90094	0.0272652	0.697312
CCT3	YJL014W	T-complex protein 1 subunit gamma	P39077	32.9663	32.9829	32.9904	32.9772	0.703061	32.9283	32.9451	32.8563	32.7577	3.42435	0.107313	0.0466043
CCT4	YDL143W	T-complex protein 1 subunit delta	P39078	32.6528	32.7246	32.6861	32.7363	2.62665	32.5716	32.6062	32.6713	32.5656	2.88516	0.09629	0.0204373
CCT5	YJR064W	T-complex protein 1 subunit epsilon	P40413	32.449	32.516	32.6339	32.5856	5.58136	32.4469	32.4673	32.5686	32.4245	2.19034	0.0693059	0.226633
CCT6	YDR188W	T-complex protein 1 subunit zeta	P39079	31.9738	31.9298	31.8937	31.8682	3.19209	31.8679	31.8219	31.8698	32.0323	4.37174	0.0184332	0.732776
CCT7	YJL111W	T-complex protein 1 subunit eta	P42943	32.4794	32.3323	32.3374	32.3744	4.82275	32.2887	32.2921	32.3355	32.3755	5.03906	0.0579174	0.196184
CCT8	YJL008C	T-complex protein 1 subunit theta	P47079	33.1007	32.9288	32.7322	33.027	10.766	32.891	32.8434	32.9012	32.8862	4.09149	0.0667752	0.440432
CCW12	YLR110C	Covalently-linked cell wall protein 12	Q12127	27.037	26.9824	26.9637	26.8933	4.09486	27.3529	27.2301	26.9643	27.0988	17.122	-0.19245	0.0734271
CCW14	YLR390W-A	Covalently-linked cell wall protein 14	O13547	27.4146	28.0544	27.7634	27.3121	24.0236	27.3437	27.2564	27.9482	27.7999	28.5789	0.0491105	0.844448
CDC1	YDR182W	Cell division control protein 1	P40986	29.4442	29.111	29.0774	29.2105	11.9127	29.3807	29.1957	29.3325	29.3183	9.15757	-0.0960039	0.335319
CDC10	YCR002C	Cell division control protein 10	P25342	31.2637	31.1482	31.2292	31.2303	3.36448	30.9995	31.0858	30.9588	30.9698	6.63633	0.214369	0.00129452
CDC11	YJR076C	Cell division control protein 11	P32458	30.2226	30.3511	30.4909	30.1218	11.1606	30.1337	30.3848	30.1639	30.1328	9.2879	0.0928012	0.391238
CDC12	YHR107C	Cell division control protein 12	P32468	31.636	31.7369	31.8648	31.7805	6.57215	31.6846	31.7346	31.6875	31.7651	6.1723	0.0366115	0.503297
CDC123	YLR215C	Cell division cycle protein 123	Q05791	26.0099	25.9023	26.002	26.6197	24.9838	26.3076	25.5261	25.8403	25.7891	15.6677	0.267725	0.290261
CDC14	YFR028C	Tyrosine-protein phosphatase CDC14	Q00684	28.4764	28.8451	28.8645	28.6499	12.3614	28.8399	28.7816	28.7412	28.6043	6.8112	-0.0327915	0.763762
CDC15	YAR019C	Cell division control protein 15	P27636	23.8916	23.5979	23.6339	23.9729	12.9157	23.4742	23.9995	23.699	24.1426	12.5067	-0.0547438	0.767045
CDC16	YKL022C	Anaphase-promoting complex subunit CDC16	P09798	26.2188	26.0047	26.0175	25.8904	9.6633	26.2572	26.0782	26.1182	25.9911	23.6148	-0.0783349	0.407299
CDC19	YAL038W	Pyruvate kinase 1	P00549	37.7574	37.7006	37.7293	37.7949	2.7942	37.7846	37.7804	37.8639	37.8558	3.8433	-0.0756128	0.0458686
CDC20	YGL116W	APC/C activator protein CDC20	P26309	25.5478	25.1312	25.4999	25.6893	15.5886	25.7078	25.7788	24.6726	25.2508	19.4577	0.114554	0.698105
CDC21	YOR074C	Thymidylate synthase	P06785	29.4877	29.3053	29.4436	29.5048	6.11573	29.2513	29.3753	29.3334	29.4574	8.15504	0.0809841	0.241751
CDC24	YAL041W	Cell division control protein 24	P11433	28.1652	27.9638	28.0185	27.8948	8.09803	28.0495	27.8051	27.9508	27.9742	3.73133	0.0656732	0.425773
CDC25	YLR310C	Cell division control protein 25	P04821	28.4233	28.6195	28.3526	28.4677	7.97273	28.8074	28.6386	28.7636	28.3992	6.58376	-0.186367	0.13399
CDC27	YBL084C	Anaphase-promoting complex subunit CDC27	P38042	25.5694	27.1392	27.2847	26.6665	43.443	27.3385	27.1578	26.8078	26.3723	10.8972	-0.254135	0.586912
CDC28	YBR160W	Cyclin-dependent kinase 1	P00546	30.7844	31.4022	31.4353	31.1075	19.9621	31.0084	31.2447	31.0519	30.878	5.62278	0.136601	0.451444
CDC3	YLR314C	Cell division control protein 3	P32457	31.4954	31.4777	31.5295	31.502	1.49396	31.4287	31.4482	31.5489	31.4284	3.36772	0.0376008	0.267482
CDC31	YOR257W	Cell division control protein 31	P06704	27.4368	27.1331	27.4775	27.6881	15.4711	27.7909	27.7782	27.7887	27.6676	3.83553	-0.322441	0.0342617
CDC33	YOL139C	Eukaryotic translation initiation factor 4E	P07260	32.8269	33.0877	33.1586	33.1053	9.80726	33.2785	33.1726	33.2164	33.0808	7.27695	-0.142431	0.144705
CDC34	YDR054C	Ubiquitin-conjugating enzyme E2-34 kDa	P14682	27.9748	28.0473	28.1925	28.2059	7.75463	28.2961	27.995	28.1639	28.1915	6.24211	-0.0565121	0.526614
CDC36	YDL165W	General negative regulator of transcription subunit 2	P06100	26.0004	25.8251	25.7492	25.4569	15.2386	26.0244	26.1058	26.0894	25.8654	15.998	-0.263327	0.0813476
CDC37	YDR168W	Hsp90 co-chaperone Cdc37	P06101	31.28	31.1199	31.3155	31.262	5.81053	31.2582	31.2629	31.228	31.221	8.29671	0.00181618	0.968573
CDC39	YCR093W	General negative regulator of transcription subunit 1	P25655	30.9215	30.7649	30.7068	30.8873	6.98045	30.8025	30.6664	30.8299	30.9151	5.16992	0.0166139	0.825743
CDC4	YFL009W	Cell division control protein 4	P07834	25.8859	26.0385	26.3392	25.3121	27.8416	26.035	25.4008	25.7308	25.398	31.107	0.25279	0.37567
CDC40	YDR364C	Pre-mRNA-processing factor 17	P40968	25.6709	25.791	26.0647	25.6745	13.4156	25.3168	26.0971	25.6309	25.8776	9.73357	0.0696805	0.72831
CDC42	YLR229C	Cell division control protein 42	P19073	30.1323	29.9407	29.7242	30.2118	14.6558	30.0322	29.8407	30.1225	30.0037	4.62745	0.00246612	0.98473
CDC48	YDL126C	Cell division control protein 48	P25694	35.1096	34.9453	34.8949	34.9962	6.45692	34.9636	34.9842	34.9314	34.8712	1.80686	0.0489145	0.384417
CDC5	YMR001C	Cell cycle serine/threonine-protein kinase CDC5/MSD2	P32562	30.2713	29.5633	31.2035	30.0809	51.2258	30.1827	30.14	30.0009	29.5985	12.7221	0.299239	0.446366
CDC50	YCR094W	Cell division control protein 50	P25656	26.5682	26.7272	26.7549	26.6547	5.7237	26.7912	26.8451	26.6303	26.4478	13.2014	-0.00234218	0.981837
CDC53	YDL132W	Cell division control protein 53	Q12018	30.4826	30.2169	30.3799	30.2125	9.23312	30.2882	30.2785	30.1623	30.2693	8.45148	0.073357	0.348753
CDC55	YGL190C	Protein phosphatase PP2A regulatory subunit B	Q00362	29.715	29.7952	29.6487	29.5829	6.31724	29.791	29.6662	29.6053	29.5767	9.68711	0.0256164	0.710398
CDC60	YPL160W	Leucine--tRNA ligase, cytoplasmic	P26637	35.2111	35.041	35.0556	35.1022	5.43468	35.1686	35.1296	35.1745	35.1749	2.61694	-0.0594143	0.188061
CDC7	YDL017W	Cell division control protein 7	P06243	25.4756	24.6352	24.4014	26.1302	55.8724	24.6029	24.4553	24.9884	25.6094	29.892	0.246621	0.620978
CDC73	YLR418C	Cell division control protein 73	Q06697	29.3746	29.4642	29.4985	29.5564	5.23239	29.5693	29.5318	29.4918	29.7061	3.29497	-0.101358	0.142767
CDC9	YDL164C	DNA ligase 1	P04819-2	28.7756	28.7824	28.7873	28.7372	1.56886	28.8249	28.8153	28.8569	28.8628	5.40662	-0.0693219	0.0054233
CDD1	YLR245C	Cytidine deaminase	Q06549	25.5809	25.584	25.8161	25.5872	8.36331	25.6706	26.1674	25.5236	25.8849	20.154	-0.169577	0.305575
CDS1	YBR029C	Phosphatidate cytidylyltransferase	P38221	30.2844	30.9559	30.8759	30.8802	19.3459	30.7745	30.6053	30.7599	30.4973	9.64793	0.0898538	0.614947
CEF1	YMR213W	Pre-mRNA-splicing factor CEF1	Q03654	25.9819	25.5911	25.583	25.7666	13.4069	25.8495	25.9175	25.9011	26.1013	16.4963	-0.211675	0.0995322
CEG1	YGL130W	mRNA-capping enzyme subunit alpha	Q01159	29.3062	29.3041	29.321	29.2698	1.49545	29.2273	29.1041	29.2695	29.1917	9.11232	0.102113	0.032206
CEM1	YER061C	3-oxoacyl-[acyl-carrier-protein] synthase homolog	P39525	28.1275	28.0108	28.275	28.2043	7.75829	28.2311	28.3922	28.0419	28.2125	13.0949	-0.0650303	0.502856
CET1	YPL228W	mRNA-capping enzyme subunit beta	O13297	29.3483	29.4145	29.3864	29.431	2.49888	29.3488	29.2778	29.2764	29.259	8.15943	0.104542	0.00810557
CEX1	YOR112W	Cytoplasmic export protein 1	Q12453	29.685	29.5367	29.7713	29.7756	7.54829	29.6944	29.6018	29.7846	29.7421	5.91878	-0.0135627	0.849081
CFD1	YIL003W	Cytosolic Fe-S cluster assembly factor CFD1	P40558	27.0523	27.0052	27.0078	27.3221	11.0239	26.7939	26.743	27.3257	26.9777	16.4413	0.136761	0.403317
CFT1	YDR301W	Protein CFT1	Q06632	27.6167	27.0172	27.544	27.0377	22.0161	27.1205	27.2922	27.1185	27.294	8.45952	0.0975783	0.582489
CFT2	YLR115W	Cleavage factor two protein 2	Q12102	26.0673	26.0327	26.6933	26.2545	22.5353	26.0322	26.4239	25.8496	26.3163	22.0099	0.106431	0.614903
CGI121	YML036W	EKC/KEOPS complex subunit CGI121	Q03705	26.7183	26.7754	26.699	26.7703	2.62778	27.2898	27.5674	27.3484	27.2681	5.80407	-0.6277	0.000116732
CGR1	YGL029W	rRNA-processing protein CGR1	P53188	26.4059	25.8246	26.1196	26.1888	16.2952	26.0392	26.6115	26.1373	26.5093	22.5857	-0.189581	0.34233
CHA1	YCL064C	Catabolic L-serine/threonine dehydratase;L-serine dehydratase;L-threonine dehydratase	P25379	33.2916	33.1094	33.0581	33.1894	7.12545	33.1546	33.2222	33.1554	33.2275	3.15597	-0.0277627	0.630287
CHC1	YGL206C	Clathrin heavy chain	P22137	33.9374	33.8641	33.8281	33.8919	3.20354	33.7818	33.6631	33.721	33.6855	3.03721	0.16752	0.00290194
CHD1	YER164W	Chromo domain-containing protein 1	P32657	30.4491	30.3036	30.3876	30.3302	4.5107	30.3744	30.4489	30.3942	30.3345	2.86451	-0.0203689	0.630085
CHK1	YBR274W	Serine/threonine-protein kinase CHK1	P38147	22.7366	23.0439	23.13	24.0293	43.1341	22.8879	22.994	22.9961	23.1989	35.2606	0.215697	0.478448
CHO1	YER026C	CDP-diacylglycerol--serine O-phosphatidyltransferase	P08456	30.0283	29.6554	29.6865	29.7907	12.1631	29.7059	29.3993	29.5735	29.706	8.11856	0.194009	0.132294
CHO2	YGR157W	Phosphatidylethanolamine N-methyltransferase	P05374	31.4566	31.1568	31.2339	31.169	10.0275	31.1346	31.1138	31.1769	31.3228	3.51875	0.0670166	0.455633
CHS1	YNL192W	Chitin synthase 1	P08004	26.6174	26.7352	25.5103	26.568	31.9638	26.9938	26.1957	26.7058	26.5451	17.1601	-0.252388	0.473024
CHS2	YBR038W	Chitin synthase 2	P14180	27.5274	27.3948	27.3357	27.3222	6.64043	27.2395	27.4113	27.1865	27.3008	7.28908	0.1105	0.151579
CHS3	YBR023C	Chitin synthase 3	P29465	29.0906	29.0648	29.0051	28.9441	4.49975	28.8754	28.961	28.9113	28.9863	8.69832	0.0926669	0.0647633
CHS5	YLR330W	Chitin biosynthesis protein CHS5	Q12114	29.932	30.0153	29.9302	29.9521	2.79519	29.8644	29.6412	29.8386	29.9593	5.51587	0.131517	0.108159
CHZ1	YER030W	Histone H2A.Z-specific chaperone CHZ1	P40019	27.2225	27.5493	27.8246	27.0873	23.3591	27.4516	27.454	27.3514	27.1111	16.6392	0.078899	0.683684
CIA1	YDR267C	Cytosolic iron-sulfur protein assembly protein 1	Q05583	26.246	25.9119	25.9504	25.5353	19.7618	25.5137	25.4711	25.2671	24.6861	26.9868	0.676389	0.0303737
CIC1	YHR052W	Proteasome-interacting protein CIC1	P38779	30.687	30.5038	30.6566	30.4591	7.74846	30.2733	30.4632	30.2935	30.4497	7.38276	0.206695	0.0334275
CIK1	YMR198W	Spindle pole body-associated protein CIK1	Q01649	28.6074	28.5806	26.2821	28.5508	49.7761	27.9893	27.9245	28.1425	27.9711	37.776	-0.00161865	0.997851
CIN2	YPL241C	Tubulin-specific chaperone C	P46670	24.7313	25.4386	25.1797	24.9964	20.5758	25.2025	25.6422	24.8348	24.5104	12.1946	0.0390197	0.895771
CIR1	YGR207C	Probable electron transfer flavoprotein subunit beta	P42940	29.7739	29.8594	29.8048	29.9222	4.54454	30.5058	30.3187	30.3188	30.0217	7.66218	-0.451161	0.00517018
CIR2	YOR356W	Probable electron transfer flavoprotein-ubiquinone oxidoreductase, mitochondrial	Q08822	28.75	28.2389	28.1979	28.3412	18.738	28.687	28.5603	28.505	28.5091	6.97972	-0.183325	0.218075
CIS3	YJL158C	Cell wall mannoprotein CIS3	P47001	28.7039	29.1812	29.556	28.9168	26.1356	29.1163	29.2888	29.3889	29.1125	19.1345	-0.137168	0.509777
CIT1	YNR001C	Citrate synthase, mitochondrial	P00890	32.1103	31.96	31.9127	32.0446	6.11171	32.068	32.0802	32.0852	32.0518	11.6488	-0.0643812	0.198887
CIT2	YCR005C	Citrate synthase, peroxisomal	P08679	28.7853	28.5172	28.6376	28.5703	8.20781	28.4583	28.7062	28.5543	28.5861	11.1749	0.0513748	0.531364
CKA1	YIL035C	Casein kinase II subunit alpha	P15790	29.2238	29.1538	29.2662	29.0824	5.56477	28.8567	28.6759	28.8637	28.6472	11.8519	0.420664	0.000984588
CKA2	YOR061W	Casein kinase II subunit alpha	P19454	30.3225	30.1187	30.0981	30.0846	8.0381	30.0482	29.8686	30.0356	30.0345	7.62965	0.159258	0.0645121
CKB1	YGL019W	Casein kinase II subunit beta	P43639	29.2012	29.2715	29.3807	29.186	6.25481	28.6937	28.9306	29.0655	28.7007	9.90538	0.412241	0.00659832
CKB2	YOR039W	Casein kinase II subunit beta	P38930	28.3235	28.6968	28.8789	28.305	19.8281	28.0739	28.2312	28.0377	27.7174	3.09164	0.535937	0.0236939
CKI1	YLR133W	Choline kinase	P20485	29.5771	29.3423	29.4445	29.4156	6.89676	29.4757	29.3708	29.3661	29.4828	9.86412	0.0210042	0.732224
CKS1	YBR135W	Cyclin-dependent kinases regulatory subunit	P20486	27.1472	27.3905	27.6287	27.384	13.6238	27.8157	27.9827	27.7646	27.6451	9.12843	-0.414455	0.0139083
CLA4	YNL298W	Serine/threonine-protein kinase CLA4	P48562	28.4763	28.5836	28.568	28.4328	5.00641	28.4758	28.4486	28.4193	28.5254	6.44878	0.0478535	0.305191
CLB2	YPR119W	G2/mitotic-specific cyclin-2	P24869	26.0032	26.4462	26.4778	25.9177	19.9797	25.9357	26.429	26.2331	25.9652	30.934	0.0704856	0.719385
CLC1	YGR167W	Clathrin light chain	P17891	31.3846	31.4109	31.1706	31.4214	7.89004	31.2604	31.299	31.3221	31.3289	8.14381	0.0442878	0.496764
CLP1	YOR250C	mRNA cleavage and polyadenylation factor CLP1	Q08685	27.2413	27.4432	27.6486	27.4608	11.4924	27.3843	27.3603	27.4967	27.5041	8.29842	0.0121099	0.898735
CLU1	YMR012W	Clustered mitochondria protein 1	Q03690	33.6252	33.5212	33.4886	33.6185	4.7615	33.6888	33.5402	33.6555	33.5943	5.11229	-0.0563433	0.281819
CMD1	YBR109C	Calmodulin	P06787	31.2776	30.9123	31.1277	31.5579	19.0285	31.7565	31.6865	31.8705	31.7097	5.78437	-0.536942	0.00906406
CMK1	YFR014C	Calcium/calmodulin-dependent protein kinase I	P27466	28.3551	27.8872	27.5913	28.0167	22.1023	27.9488	27.9339	28.1956	28.3071	14.3486	-0.133764	0.49292
CMK2	YOL016C	Calcium/calmodulin-dependent protein kinase II	P22517	28.9874	29.13	29.1451	29.1708	5.56552	29.1127	28.9747	28.9635	28.8078	7.21512	0.143627	0.102867
CMP2	YML057W	Serine/threonine-protein phosphatase 2B catalytic subunit A2	P14747	29.3872	29.2683	29.3731	29.1701	6.93364	29.4028	29.4785	29.2435	29.2091	9.3003	-0.0337923	0.693819
CMS1	YLR003C	Protein CMS1	Q07897	28.5534	28.7605	29.1601	28.7481	18.5021	28.4978	28.9065	28.6241	28.597	6.16388	0.149169	0.371938
CNA1	YLR433C	Serine/threonine-protein phosphatase 2B catalytic subunit A1	P23287	28.625	28.6633	28.9718	28.5452	13.6	28.7729	28.9687	28.6259	28.4464	8.48397	-0.00217693	0.988505
CNB1	YKL190W	Calcineurin subunit B	P25296	27.9284	27.496	27.5973	27.9338	15.4619	28.4106	28.1912	28.4154	28.0536	22.4119	-0.528857	0.0102426
CNE1	YAL058W	Calnexin homolog	P27825	29.584	29.8965	29.0258	29.534	23.7215	29.4181	29.5497	30.1345	29.6925	28.9532	-0.188669	0.458468
CNM67	YNL225C	Chaotic nuclear migration protein 67	P53865	26.2172	25.6152	25.5898	25.6624	22.6873	25.9719	25.8865	25.6082	25.9209	13.6312	-0.0757162	0.672021
CNS1	YBR155W	Hsp70/Hsp90 co-chaperone CNS1	P33313	29.6405	29.4334	29.538	29.666	7.26175	29.7715	29.9851	29.9269	29.7776	7.07741	-0.295803	0.00784426
COA1	YIL157C	Cytochrome c oxidase assembly factor 1	P40452	25.3099	24.1996	23.1583	24.3615	58.8956	24.5393	24.4326	24.5949	24.7189	40.5776	-0.314059	0.506489
coa6	YMR244C-A	Cytochrome c oxidase assembly factor 6	Q3E846	26.1744	25.3217	25.2201	26.1154	34.0545	25.902	26.0609	26.343	26.0366	43.7087	-0.377734	0.211105
COF1	YLL050C	Cofilin	Q03048	32.0415	31.6461	31.489	32.0756	19.7634	32.2124	31.8729	32.1096	32.348	15.7606	-0.322662	0.117632
COG1	YGL223C	Conserved oligomeric Golgi complex subunit 1	P53079	25.7315	25.505	25.323	25.2701	14.867	25.4914	25.1708	25.9797	25.6446	9.44204	-0.114225	0.58463
COG2	YGR120C	Conserved oligomeric Golgi complex subunit 2	P53271	25.5072	24.3088	24.7331	24.5633	39.4912	23.3235	24.8521	22.8969	24.3857	17.0363	0.913567	0.130957
COG3	YER157W	Conserved oligomeric Golgi complex subunit 3	P40094	27.8863	27.8108	28.0449	28.1073	9.48738	27.7003	27.8469	27.8841	28.1021	15.2524	0.0789832	0.49111
COG4	YPR105C	Conserved oligomeric Golgi complex subunit 4	Q06096	28.1173	27.6769	27.7409	27.9498	14.1367	27.6498	27.5513	27.7049	27.9105	2.59689	0.16712	0.232813
COG5	YNL051W	Conserved oligomeric Golgi complex subunit 5	P53951	26.6744	26.8799	27.5751	27.0278	28.6228	27.3562	27.15	27.408	26.9361	16.2478	-0.173236	0.462492
COG6	YNL041C	Conserved oligomeric Golgi complex subunit 6	P53959	27.8339	28.1067	28.0105	28.0569	7.99549	28.0345	28.2327	28.1817	27.9459	7.20194	-0.0966872	0.317999
COG7	YGL005C	Conserved oligomeric Golgi complex subunit 7	P53195	25.3643	24.3857	24.539	25.2262	32.9523	24.9382	25.0503	24.5087	24.8761	23.0073	0.0355225	0.899915
COG8	YML071C	Conserved oligomeric Golgi complex subunit 8	Q04632	27.4089	27.1799	27.1587	27.413	9.66411	27.5475	27.1609	27.4362	27.5043	6.51783	-0.122101	0.315448
COP1	YDL145C	Coatomer subunit alpha	P53622	33.2779	33.1359	33.077	33.185	5.9366	33.1196	32.988	33.0849	33.2503	1.92849	0.0582811	0.430035
COQ1	YBR003W	Hexaprenyl pyrophosphate synthase, mitochondrial	P18900	28.6196	28.5978	28.4934	28.5691	3.77342	28.6773	28.5563	28.6513	28.4559	13.097	-0.01523	0.799585
COQ2	YNR041C	4-hydroxybenzoate polyprenyltransferase, mitochondrial	P32378	26.5216	26.1343	26.6287	26.2449	15.9463	26.6089	26.5422	26.421	26.9091	14.9032	-0.237914	0.176676
COQ3	YOL096C	Hexaprenyldihydroxybenzoate methyltransferase, mitochondrial	P27680							24.1803	23.9295		21.8983
COQ4	YDR204W	Ubiquinone biosynthesis protein COQ4, mitochondrial	O13525	22.803	24.0634	24.7789	23.7946	52.3524	22.849	24.4587	22.7211	23.1519	27.3474	0.564772	0.36068
COQ5	YML110C	2-methoxy-6-polyprenyl-1,4-benzoquinol methylase, mitochondrial	P49017	30.0962	29.7727	29.7666	29.9492	11.1362	30.1339	29.8933	30.0046	30.1349	19.1397	-0.145501	0.188509
COQ6	YGR255C	Ubiquinone biosynthesis monooxygenase COQ6	P53318	26.6757	27.0336	27.1961	26.958	14.6182	27.2431	27.2381	27.244	27.206	11.2374	-0.266931	0.0500059
COQ8	YGL119W	Probable serine/threonine-protein kinase COQ8, mitochondrial	P27697	28.2497	28.1387	28.1308	28.3846	8.40028	28.2468	28.1195	28.048	28.0114	5.29405	0.119541	0.180563
COQ9	YLR201C	Ubiquinone biosynthesis protein COQ9, mitochondrial	Q05779	23.7268	24.1304	24.6649	24.2969	26.6289	24.5388		24.1112	24.393	14.2626	-0.142912	0.596577
COR1	YBL045C	Cytochrome b-c1 complex subunit 1, mitochondrial	P07256	32.3	31.9674	31.9541	31.9737	12.275	32.186	32.1094	32.1617	32.2253	9.63215	-0.121768	0.212362
COS4;COS1;COS5;COS3;COS2	YFL062W	Protein COS4;Protein COS1;Protein COS5;Protein COS3;Protein COS2	P43542	25.7869	24.7323	24.9143	25.2011	34.2639	25.3094	25.1363	25.6127	25.9283	3.95937	-0.338038	0.286584
COS9	YKL219W	Protein COS9	P36034	25.2366	25.0678	25.3941	25.7007	19.1756	25.2979	25.2019	25.1974	25.1096	19.5708	0.148055	0.330927
COT1	YOR316C	Cobalt uptake protein COT1	P32798	30.2082	30.4043	30.498	30.2543	9.33559	30.0196	30.2157	30.2019	30.1666	13.2229	0.190239	0.0564422
COX1	YPL172C	Cytochrome c oxidase subunit 1	P00401	25.9758	25.5881	26.5566	25.8089	30.8535	24.9833	25.1786	25.5465	25.1556	17.1624	0.766333	0.0183614
COX11	YPL132W	Cytochrome c oxidase assembly protein COX11, mitochondrial	P19516	26.0346	25.8643	25.5665	26.0947	15.6186	26.249	26.1169	25.9788	26.557	9.53822	-0.335379	0.0976575
COX12	YLR038C	Cytochrome c oxidase subunit 6B	Q01519	24.137	24.2373	25.4024	24.5086	45.2774	25.2931	25.7325	23.7748	25.1064	18.7369	-0.405365	0.457416
COX13	YGL191W	Cytochrome c oxidase subunit 6A, mitochondrial	P32799	24.4406	25.0192	23.1419		56.3014	23.7586	24.307	24.8685	23.8848	29.5515	-0.0041304	0.994307
COX14	YML129C	Cytochrome c oxidase assembly protein COX14	P39103	20.8273	21.1306	21.4333	20.5406	26.557	21.4109	21.3536	21.6773	21.8136	38.8385	-0.58093	0.0392818
COX15	YER141W	Cytochrome c oxidase assembly protein COX15	P40086	26.9743	27.069	27.2064	27.0174	7.12735	27.0972	26.8992	26.8838	26.8452	4.06523	0.135445	0.123636
COX16	YJL003W	Cytochrome c oxidase assembly protein COX16, mitochondrial	P47081	24.4423	24.2043	24.9085		25.5341		24.9153		24.5766	17.9236	-0.227596	0.497055
COX2	YDR231C	Cytochrome c oxidase subunit 2	P00410	28.7281	28.4118	28.5502	28.6627	9.46442	28.1874	28.1046	28.2231	28.4224	8.3015	0.353847	0.0105911
COX20	YDR231C	Cytochrome c oxidase protein 20, mitochondrial	Q04935	28.6279	28.7785	28.6481	28.7054	4.72561	28.2732	28.1334	28.1323	28.3557	6.96113	0.466319	0.000357772
COX4	YGL187C	Cytochrome c oxidase subunit 4, mitochondrial	P04037	28.2871	27.7968	28.1501	28.6444	24.2436	28.4523	28.4078	28.5645	28.3865	20.4328	-0.233177	0.242077
COX5A	YNL052W	Cytochrome c oxidase polypeptide 5A, mitochondrial	P00424	25.7853	26.1032	25.7824	26.3138	18.3417	25.6777	26.2775	26.1775	25.4244	7.53178	0.106888	0.672988
COX5B	YIL111W	Cytochrome c oxidase polypeptide 5B, mitochondrial	P00425	26.8729	27.051	27.0272	26.8788	6.56922	27.1834	26.9734	27.2211	26.9467	10.3971	-0.123695	0.195797
COX6	YHR051W	Cytochrome c oxidase subunit 6, mitochondrial	P00427	27.9719	27.5625	28.0596	28.1773	17.2756	28.488	28.5638	28.6692	28.2408	9.3133	-0.547663	0.0147315
COX7	YMR256C	Cytochrome c oxidase subunit 7	P10174	24.7485	24.7446	25.6325	24.3971	40.6567	24.8013	25.3157	24.5628	24.7147	23.8447	0.0320172	0.921167
COX9	YDL067C	Cytochrome c oxidase subunit 7A	P07255			25.3426			25.4443	25.8383	25.3595	24.8251	26.4552	-0.024241
COY1	YKL179C	Protein CASP	P34237	29.9166	29.9927	30.0519	29.8314	6.58341	29.8992	30.0443	29.831	29.8601	6.92905	0.0395042	0.578256
CPA1	YOR303W	Carbamoyl-phosphate synthase arginine-specific small chain	P07258	33.2965	33.4057	33.3415	33.2938	3.66286	33.1926	33.3307	33.3748	33.2358	5.56911	0.050897	0.342796
CPA2	YJR109C	Carbamoyl-phosphate synthase arginine-specific large chain	P03965	35.5622	35.4773	35.4656	35.4969	3.02168	35.1103	35.2923	35.4471	35.3618	8.05296	0.197634	0.0383431
CPD1	YGR247W	2,3-cyclic-nucleotide 3-phosphodiesterase	P53314	25.3962	25.4319	25.4867	25.7386	11.1899	26.0509	26.0029	25.9224	25.8691	25.7925	-0.448001	0.00215937
CPR1	YDR155C	Peptidyl-prolyl cis-trans isomerase	P14832	34.9717	34.7909	34.7961	34.902	6.11114	34.8409	34.9269	34.779	34.9045	11.9173	0.00234178	0.967438
CPR2	YHR057C	Peptidyl-prolyl cis-trans isomerase B	P23285	25.2707	25.3064	25.4124	25.488	6.92562	25.434	25.2042	24.7962	25.6927	6.05288	0.0875981	0.6714
CPR3	YML078W	Peptidyl-prolyl cis-trans isomerase C, mitochondrial	P25719	32.062	31.92	31.9091	32.0556	5.77961	32.4062	32.4828	32.2967	32.2524	22.6543	-0.372848	0.00141454
CPR4	YCR069W	Peptidyl-prolyl cis-trans isomerase CPR4	P25334	25.3482	25.4457	25.4004	25.3267	3.72119	25.51	25.7228	25.4751	25.5884	23.1725	-0.193797	0.0192679
CPR5	YDR304C	Peptidyl-prolyl cis-trans isomerase D	P35176	29.835	29.3544	29.7468	29.584	14.1927	29.779	29.6368	29.6271	29.7242	11.4685	-0.0617229	0.600374
CPR6	YLR216C	Peptidyl-prolyl cis-trans isomerase CPR6	P53691	32.7363	32.6106	32.7273	32.814	5.75596	32.7076	32.68	32.7855	32.7392	3.7206	-0.00603852	0.903322
CPR7	YJR032W	Peptidyl-prolyl cis-trans isomerase CYP7	P47103	29.3381	29.1571	29.1784	29.3707	7.54725	29.389	29.2864	29.6408	29.675	12.1211	-0.23669	0.0739722
CPR8	YNR028W	Peptidyl-prolyl cis-trans isomerase CYP8	P53728	26.7873	26.5517	26.4889	26.7858	10.7327	26.5869	27.0662	26.666	26.9406	3.20577	-0.161475	0.283843
CPS1	YJL172W	Carboxypeptidase S	P27614	31.9708	31.9707	32.0889	32.1452	6.09478	31.8773	31.9917	31.9454	31.8441	3.41861	0.129249	0.0569137
CPT1	YNL130C	Cholinephosphotransferase 1	P17898	26.7478	26.4743	26.1851	27.1488	28.9021	25.8058	26.7665	25.8354	26.5578	26.9497	0.397597	0.261531
CRG1	YHR209W	Probable S-adenosylmethionine-dependent methyltransferase CRG1	P38892	22.5545	23.0271	23.5814	22.2789	40.9176	23.6487	22.0028	20.3479	22.319	46.3486	0.780906	0.329619
CRH1	YGR189C	Probable glycosidase CRH1	P53301	28.9397	29.4636	29.5897	29.3718	18.1798	29.5853	29.8061	29.4103	29.081	7.32302	-0.129461	0.556887
CRM1	YGR218W	Exportin-1	P30822	31.2117	30.9071	30.9433	31.0576	9.69997	30.8427	30.5397	30.7344	31.0109	12.0983	0.247989	0.0847201
CRN1	YLR429W	Coronin-like protein	Q06440	32.6003	32.6844	32.7192	32.6382	3.60673	32.679	32.7296	32.6085	32.6178	4.05354	0.00177569	0.964696
CRP1	YHR146W	Cruciform DNA-recognizing protein 1;CRP1 short N-terminal subpeptide;CRP1 short C-terminal subpeptide	P38845	30.2245	30.4576	30.5622	30.5076	9.89154	30.4144	30.3371	30.4119	30.0535	8.26383	0.133742	0.282324
CRZ1	YNL027W	Transcriptional regulator CRZ1	P53968	27.5194	27.6842	27.4323	27.2149	13.3608	27.2521	27.1061	27.4275	27.5486	8.92498	0.129123	0.385038
CSC1	YLR241W	Calcium permeable stress-gated cation channel 1	Q06538	25.9392	26.185	26.112	26.0613	7.08516	26.2421	26.3565	26.1278	26.0334	6.72554	-0.115596	0.232467
CSE1	YGL238W	Importin alpha re-exporter	P33307	30.1208	29.7818	29.8529	29.9385	10.3768	29.9073	29.7517	29.9293	30.1701	5.94891	-0.01613	0.891363
CSG2	YBR036C	Mannosyl phosphorylinositol ceramide synthase regulatory protein CSG2	P35206	24.7115	25.0704	24.9655	25.0063	10.4367	24.6822	24.4897	24.5759	23.5438	23.8267	0.615542	0.0658958
CSL4	YNL232W	Exosome complex component CSL4	P53859	28.1911	28.5134	28.7456	28.4028	16.0593	28.2378	28.4961	28.4958	28.1334	6.06948	0.122436	0.438865
CSM1	YCR086W	Monopolin complex subunit CSM1	P25651	24.0596	24.2455	24.4919	24.6197	17.1012	24.9294	24.7077	24.977	24.4516	4.47077	-0.412261	0.0551257
CSN12	YJR084W	Cop9 signalosome complex subunit 12	P47130	30.4024	29.9658	30.1968	30.3895	13.669	30.3626	30.3808	30.4422	30.4479	12.9345	-0.169755	0.15576
CSR1	YLR380W	Phosphatidylinositol transfer protein CSR1	Q06705	30.1775	30.209	30.3722	30.2822	6.0664	30.2331	30.4576	30.1833	30.2682	5.31351	-0.0253153	0.743748
CST26	YBR042C	Uncharacterized acyltransferase CST26	P38226	27.276	27.7232	27.7104	27.3718	15.7786	27.498	27.5379	27.4151	26.8453	8.19546	0.196242	0.360911
CST6	YIL036W	ATF/CREB activator 2	P40535	28.8267	29.0149	29.0273	28.7367	9.82039	29.0489	28.9165	28.7941	28.7768	4.40547	0.0173459	0.861738
CTF18	YMR078C	Chromosome transmission fidelity protein 18	P49956	25.715	25.618	25.8398	25.6245	7.31493	25.5026	25.7146	25.648	25.6137	10.2778	0.0795653	0.28728
CTF3	YLR381W	Central kinetochore subunit CTF3	Q12748	21.3354	21.9302	21.5046	21.3222	21.0691	21.5824	21.3864	21.4192	21.7876	14.4833	-0.0208439	0.905889
CTF4	YPR135W	DNA polymerase alpha-binding protein	Q01454	28.9838	28.8143	28.9744	28.922	5.29351	29.1244	28.9066	28.9004	28.8682	7.45138	-0.0262764	0.722095
CTF8	YHR191C	Chromosome transmission fidelity protein 8	P38877	24.3669	24.7359	25.0212	24.3719	22.528	25.1496	24.9096	25.021	24.4203	19.2686	-0.251147	0.305993
CTI6	YPL181W	Histone deacetylase complex subunit CTI6	Q08923	26.4588	26.9553	26.357	26.4772	19.9748	26.6988	26.394	26.2755	26.2988	14.037	0.145286	0.413611
CTK1	YKL139W	CTD kinase subunit alpha	Q03957	27.3944	27.9113	27.673	27.6162	14.7635	27.6907	28.0308	27.7347	27.6386	0.416963	-0.12494	0.399628
CTK2	YJL006C	CTD kinase subunit beta	P46962	25.3711	25.101	25.5257	25.001	16.7898	25.0757	25.3352	25.8488	25.7723	7.99911	-0.258301	0.283627
CTK3	YML112W	CTD kinase subunit gamma	P46963	27.9785	26.9877	27.1492	27.631	31.8056	27.5922	27.7715	27.454	27.7294	8.02413	-0.200146	0.431952
CTP1	YBR291C	Tricarboxylate transport protein	P38152	24.2424	23.7485	24.4356	25.3707	51.055	24.8914	25.0953	25.1363	24.9385	28.4639	-0.566098	0.151596
CTR1	YPR124W	Copper transport protein CTR1	P49573	28.58	28.8764	29.1944	28.4741	23.13	28.3256	28.3584	28.4821	28.7122	9.06882	0.311685	0.141386
CTR86	YCR054C	Copper transport protein 86	P25355	26.3568	26.5785	26.6524	26.2101	13.8723	26.2205	26.329	26.434	26.0231	13.1	0.197779	0.191019
CTR9	YOL145C	RNA polymerase-associated protein CTR9	P89105	30.0695	29.9632	30.0411	30.0352	3.10311	29.9956	29.8336	30.1174	30.021	9.25194	0.0353278	0.59594
CTS1	YLR286C	Endochitinase	P29029	26.9703	27.0249	27.3574	26.9808	13.5253	27.1584	27.1816	27.3002	27.7306	7.92724	-0.259351	0.160019
CTS2	YDR371W	Sporulation-specific chitinase 2	Q06350	25.2689	24.5151	24.1687	24.5616	34.5242	24.6326	24.6411	24.6096	25.2558	50.6628	-0.156199	0.596069
CTT1	YGR088W	Catalase T	P06115	26.2213	27.1213	27.0908	27.1926	26.8027	27.047	27.3568	26.8152	26.3852	21.8421	0.00547192	0.986376
CUE1	YMR264W	Coupling of ubiquitin conjugation to ER degradation protein 1	P38428	29.0823	29.1175	28.8089	29.0275	9.22703	29.0693	29.4048	29.0037	28.8743	13.1447	-0.0790101	0.57307
CUE2	YKL090W	Ubiquitin-binding protein CUE2	P36075	23.517	23.4868	23.3931	24.257	31.0042	23.6258	23.5733	23.7551	23.6455	11.5697	0.0135457	0.949023
CUE3	YGL110C	CUE domain-containing protein 3	P53137	28.6302	29.2569	29.074	28.9967	17.4083	28.9851	29.3523	29.0624	28.7574	8.07369	-0.0498263	0.791175
CUE4	YML101C	CUE domain-containing protein CUE4	Q04201	26.8648	26.3585	26.4857	26.7581	16.1471	26.8693	27.0242	26.9967	27.1808	12.4738	-0.400957	0.0240338
CUE5	YOR042W	Ubiquitin-binding protein CUE5	Q08412	29.8913	30.1984	30.2311	30.0999	10.239	29.9635	29.9094	29.8989	29.9041	7.22694	0.186159	0.0542994
CUL3	YGR003W	Cullin-3	P53202	25.5978	25.5111	25.4685	25.6199	4.93837	25.4417	25.7321	25.9046	25.7508	11.6471	-0.157936	0.176075
CUS1	YMR240C	Cold sensitive U2 snRNA suppressor 1	Q02554	26.5574	26.6266	27.1825	26.6118	22.2427	26.3872	27.1832	27.077	27.2028	5.81233	-0.21799	0.404364
CWC15	YDR163W	Pre-mRNA-splicing factor CWC15	Q03772	27.5512	27.5965	27.1159	27.5436	14.407	27.8531	27.8149	27.5986	27.7195	9.89535	-0.294741	0.0579804
CWC2	YDL209C	Pre-mRNA-splicing factor CWC2	Q12046	27.1228	27.2887	27.3734	27.731	18.5655	27.5403	27.2713	27.3787	26.9176	24.7207	0.101961	0.599669
CWC21	YDR482C	Pre-mRNA-splicing factor CWC21	Q03375	22.6024	23.6039	23.2359	22.0834	44.1538	22.5406	22.3151	22.8055	21.3675	69.1122	0.624246	0.223515
CWC24	YLR323C	Pre-mRNA-splicing factor CWC24	P53769	25.2558	25.1748	25.3297	25.4418	7.91399	25.2895	25.5897	25.3194	25.7205	21.142	-0.17928	0.183372
CWC25	YNL245C	Pre-mRNA-splicing factor CWC25	P53854	25.1669	25.3755	25.2307	25.3302	6.52646	25.3968	25.7146	25.4187	25.6572	9.19151	-0.271	0.0279578
CWC27	YPL064C	Peptidyl-prolyl isomerase CWC27	Q02770	25.3432	25.0945	24.4691	25.0832	23.5056	24.2022	25.0533	24.0866	25.1235	8.32614	0.381124	0.293543
CWH41	YGL027C	Mannosyl-oligosaccharide glucosidase	P53008	29.9126	29.7259	29.8417	29.9625	7.0119	29.8831	29.7062	29.8619	29.9263	3.92216	0.0162673	0.824547
CWH43	YCR017C	Protein CWH43	P25618	28.281	28.4253	28.5409	28.2299	9.87581	28.4423	28.2152	28.0742	28.4626	9.06484	0.0707265	0.568099
CWP1	YKL096W	Cell wall protein CWP1	P28319	29.188	29.1771	29.3547	29.2575	5.74689	28.9978	28.9319	28.9567	29.1271	6.95512	0.240962	0.00679647
CYB2	YML054C	Cytochrome b2, mitochondrial	P00175			23.2315
CYB5	YNL111C	Cytochrome b5	P40312	27.6066	27.7996	27.9136	27.4594	13.8608	27.7644	28.2568	27.6533	27.3245	16.0529	-0.0549474	0.809297
CYC1	YJR048W	Cytochrome c iso-1	P00044	26.9398	26.192	26.5161	26.5126	21.7795	26.5796	26.5018	26.5109	26.7558	13.4254	-0.0469379	0.784705
CYC3	YAL039C	Cytochrome c heme lyase	P06182	27.6195	27.149	27.1253	27.3067	16.5694	27.4838	27.2576	27.3472	27.5207	6.23789	-0.102202	0.458799
CYC7	YEL039C	Cytochrome c iso-2	P00045	27.8158	25.7469	28.3661	28.2733	54.7455	27.7496	26.4767	27.609	27.6176	12.6656	0.187293	0.79263
CYC8	YBR112C	General transcriptional corepressor CYC8	P14922	30.24	30.3828	30.4632	30.4483	6.88735	30.4066	30.1987	30.3068	30.1436	5.06469	0.119649	0.173558
CYK3	YDL117W	Cytokinesis protein 3	Q07533	28.0029	28.2589	28.0016	28.1517	8.77556	28.291	28.326	28.3724	28.0535	5.39764	-0.156941	0.148462
CYM1	YDR430C	Mitochondrial presequence protease	P32898	29.5885	29.4229	29.4504	29.4608	5.21585	29.4966	29.4664	29.546	29.5838	6.13922	-0.0424889	0.382419
CYR1	YJL005W	Adenylate cyclase	P08678	30.7977	30.8095	30.9732	30.7714	6.52545	30.7587	30.7126	30.773	30.7887	2.7535	0.0797123	0.152215
CYS3	YAL012W	Cystathionine gamma-lyase	P31373	34.0217	33.8979	33.8113	34.0173	6.96035	33.9657	33.8687	33.9105	34.0349	5.58576	-0.00790592	0.903052
CYS4	YGR155W	Cystathionine beta-synthase	P32582	34.8957	34.9096	34.908	34.9499	1.64322	35.1347	35.1772	35.1639	35.1623	3.6801	-0.243697	3.16426e-06
CYT1	YOR065W	Cytochrome c1, heme protein, mitochondrial	P07143	28.5643	28.1729	28.2861	28.4063	11.7167	28.5839	28.2999	28.5617	28.3808	13.9466	-0.0991639	0.396937
CYT2	YKL087C	Cytochrome c1 heme lyase	Q00873	26.4321	26.0136	25.6711	25.465	30.2446	26.3053	25.5194	26.0553	26.1636	7.0909	-0.115482	0.686489
DAD2	YKR083C	DASH complex subunit DAD2	P36162	26.6072	25.7394	26.4748	26.614	24.9814	25.6169		25.7612	25.7348	45.4842	0.654595	0.047201
DAK1	YML070W	Dihydroxyacetone kinase 1	P54838	33.2272	33.0688	33.0083	33.0213	7.16787	33.0211	32.9992	33.037	33.1527	6.81178	0.0289496	0.651233
DAK2	YFL053W	Dihydroxyacetone kinase 2	P43550	21.3068	21.8768	22.1305		27.4458	26.6819	27.319	23.726		110.686	-4.13761	0.0217564
DAL3	YIR032C	Ureidoglycolate lyase	P32459						22.5837	22.7426	22.2069	22.0325
DAL81	YIR023W	Transcriptional activator protein DAL81	P21657	25.7048	25.7895	25.9504	26.0842	11.7835	26.4226	26.3259	25.9058	26.5799	11.8396	-0.42632	0.0433367
DAM1	YGR113W	DASH complex subunit DAM1	P53267	26.8627	26.7233	26.5715	26.8442	9.09336	27.1066	26.674	26.9898	26.8875	13.0587	-0.164051	0.199356
DAP1	YPL170W	Damage response protein 1	Q12091	25.9339	25.7331	26.1194	25.93	10.8992	25.8217	26.0069	25.7939	26.0677	30.6448	0.00653692	0.95188
DAP2	YHR028C	Dipeptidyl aminopeptidase B	P18962	28.631	28.9265	28.9339	28.5925	12.7265	28.7011	28.6014	28.606	28.6709	7.98135	0.126135	0.234655
DAS1	YJL149W	F-box protein DAS1	P47005	25.6226	26.5617	26.6256	26.746	29.7449	26.9232	26.9311	25.9138	26.8896	9.48545	-0.275449	0.472889
DAS2	YDR020C	Putative uridine kinase DAS2	Q12084	25.9886	25.5238	26.0909	26.3193	21.8223	26.6697	26.8081	26.7637	26.9494	7.96404	-0.817068	0.00363799
DBF2	YGR092W	Cell cycle protein kinase DBF2	P22204	28.9482	28.1635	28.214	28.5363	26.3838	28.8	28.5586	28.6435	28.859	19.747	-0.249764	0.244643
DBF20	YPR111W	Serine/threonine-protein kinase DBF20	P32328	25.762	25.6535	25.731	25.3735	11.645	25.8216	25.9828	26.0149	26.0053	19.0028	-0.326179	0.0168209
DBP1	YPL119C	ATP-dependent RNA helicase DBP1	P24784	25.367	25.7378	24.3457	25.7894	37.7563	25.538	26.0172	26.3983	26.1844	13.1503	-0.724509	0.106393
DBP10	YDL031W	ATP-dependent RNA helicase DBP10	Q12389	30.0259	30.0062	30.0461	30.0324	1.14673	30.0584	30.1912	30.0417	30.1059	3.91553	-0.0716293	0.0833634
DBP2	YNL112W	ATP-dependent RNA helicase DBP2	P24783	33.1593	33.2539	33.2574	33.276	3.57734	33.2637	33.3891	33.3781	33.2717	2.89275	-0.088994	0.081719
DBP3	YGL078C	ATP-dependent RNA helicase DBP3	P20447	31.6082	31.5681	31.5797	31.5195	2.54931	31.6993	31.7956	31.6569	31.7658	2.60965	-0.160485	0.00456879
DBP5	YOR046C	ATP-dependent RNA helicase DBP5	P20449	32.1833	32.037	32.1304	32.1533	4.31493	32.148	32.0948	32.0964	32.1752	3.95778	-0.00261525	0.946376
DBP6	YNR038W	ATP-dependent RNA helicase DBP6	P53734	28.8751	28.9792	29.044	29.0881	6.32996	28.8764	28.9182	29.0369	28.9261	7.32159	0.0571621	0.359117
DBP7	YKR024C	ATP-dependent RNA helicase DBP7	P36120	28.9732	29.0349	29.0049	28.9606	2.31797	28.8812	28.8766	29.0622	28.9335	4.54236	0.0550123	0.280144
DBP8	YHR169W	ATP-dependent RNA helicase DBP8	P38719	29.8436	29.6569	29.6971	29.7855	5.86932	29.7026	30.2071	29.8129	29.7239	4.95835	-0.115861	0.389629
DBP9	YLR276C	ATP-dependent RNA helicase DBP9	Q06218	30.8854	30.9474	30.8445	30.8205	3.87917	30.9651	30.9273	31.021	30.8385	4.58119	-0.0635561	0.22794
DCC1	YCL016C	Sister chromatid cohesion protein DCC1	P25559	25.3134	25.6118	25.0855	25.3322	15.1232	25.6459	25.2549	25.2855	25.5984	6.97361	-0.110414	0.485369
DCD1	YHR144C	Deoxycytidylate deaminase	P06773	31.156	30.5017	30.9271	30.1294	30.3518	30.5923	30.7057	30.3298	31.1538	42.7416	-0.0168395	0.954857
DCP1	YOL149W	mRNA-decapping enzyme subunit 1	Q12517	27.9228	27.7486	27.7536	27.9078	6.58184	28.0327	27.9946	28.0845	28.2516	5.23991	-0.257659	0.0130735
DCP2	YNL118C	mRNA-decapping enzyme subunit 2	P53550	30.1042	30.1499	30.1703	30.1296	1.95619	30.2402	30.1646	30.274	30.157	4.27764	-0.0704298	0.0698373
DCR2	YLR361C	Phosphatase DCR2	Q05924	27.5171	27.8011	27.5499	27.7645	10.052	27.4222	27.6146	27.4726	27.654	3.84569	0.117265	0.246996
DCS1	YLR270W	m7GpppX diphosphatase	Q06151	31.1885	30.9845	30.9887	30.9871	7.23232	31.2218	31.3133	31.2326	31.2745	8.84533	-0.22335	0.00642795
DCS2	YOR173W	Inactive diphosphatase DCS2	Q12123	27.4898	27.1181	26.8655	27.2107	17.9557	27.2874	26.9947	27.0783	27.0505	35.6517	0.0683115	0.65174
DCW1	YKL046C	Mannan endo-1,6-alpha-mannosidase DCW1	P36091			25.3667			23.0386	24.9785	25.1319		86.6857	0.983722
DDI1	YER143W	DNA damage-inducible protein 1	P40087	28.5999	28.5172	28.669	28.6438	4.5604	28.6212	28.8725	28.6872	28.4648	3.79239	-0.0539488	0.573826
DDP1	YOR163W	Diphosphoinositol polyphosphate phosphohydrolase DDP1	Q99321	28.8604	29.0147	29.065	28.8987	6.66364	28.7201	28.8235	28.7056	28.6451	9.50216	0.236134	0.00806033
DDR48	YMR173W	Stress protein DDR48	P18899	29.4952	29.8761	29.6455	29.6308	11.2058	30.3272	30.3202	30.0268	30.0985	5.25952	-0.531282	0.00293209
DED1	YOR204W	ATP-dependent RNA helicase DED1	P06634	34.4918	34.5027	34.4407	34.5076	2.10811	34.6569	34.6484	34.5803	34.5744	4.52737	-0.129309	0.00286869
DED81	YHR019C	Asparagine--tRNA ligase, cytoplasmic	P38707	33.9659	33.7565	33.7991	33.9485	7.2695	33.9275	33.9131	34.0308	33.9829	4.43003	-0.096092	0.155239
DEF1	YKL054C	RNA polymerase II degradation factor 1	P35732	31.7054	32.0283	31.9785	31.8293	10.0337	31.8826	31.9146	31.8582	31.6968	9.20049	0.0473468	0.60975
DEG1	YFL001W	tRNA pseudouridine(38/39) synthase	P31115	26.9344	26.9346	27.2319	27.0001	10.1912	26.9621	27.0507	26.8246	26.8061	4.28499	0.114368	0.257735
DEP1	YAL013W	Transcriptional regulatory protein DEP1	P31385	26.328	26.3855	26.2053	26.1996	6.41688	26.4115	26.4947	26.3403	26.2364	14.303	-0.0911287	0.250097
DET1	YDR051C	Broad-range acid phosphatase DET1	Q99288	28.8665	29.1	29.0859	28.7124	12.6452	28.8772	29.1911	28.7055	28.8846	11.2271	0.026566	0.853062
DFG5	YMR238W	Mannan endo-1,6-alpha-mannosidase DFG5	Q05031	26.1212	25.4177	25.9378	25.8174	19.5682	25.6169	26.073	26.0619	26.5199	6.17632	-0.244365	0.342308
DFM1	YDR411C	DER1-like family member protein 1	Q12743	27.7552	28.3218	28.2599	28.0129	17.2626	28.2669	28.1086	28.1162	27.9542	4.79989	-0.0240114	0.873227
DFR1	YOR236W	Dihydrofolate reductase	P07807	26.9775	26.5475	26.8621	26.7818	12.2441	27.1997	27.3076	27.423	27.1797	11.8188	-0.485275	0.00392123
DGA1	YOR245C	Diacylglycerol O-acyltransferase 1	Q08650	26.5895	26.3874	26.704	26.7954	11.8894	26.754	26.2851	26.3443	26.4763	13.0248	0.154104	0.301869
DGK1	YOR311C	CTP-dependent diacylglycerol kinase 1	Q12382	27.3292	27.1496	27.2925	26.9828	10.6549	26.9933	27.2996	26.9586	26.9923	28.814	0.127579	0.298944
DGR2	YKL121W	2-deoxy-glucose resistant protein 2	P32330	23.6593	23.5574	24.0679	23.597	17.4799				23.599	13.3615	0.121388
DHH1	YDL160C	ATP-dependent RNA helicase DHH1	P39517	32.2541	32.1298	32.0589	32.2628	6.81631	32.215	32.1767	32.256	32.3048	4.45133	-0.0617249	0.318006
DHR2	YKL078W	Probable ATP-dependent RNA helicase DHR2	P36009	26.3529	26.31	26.5922	26.4134	8.85056	26.488	26.4389	26.4256	26.8836	6.51938	-0.141845	0.301356
DIA1	YMR316W	Protein DIA1	P54005
DIB1	YPR082C	Spliceosomal protein DIB1	Q06819		21.7402	22.2744	22.4996	25.4551	22.6569	23.3868	22.744	23.3892	13.2731	-0.872794	0.034116
DIC1	YLR348C	Mitochondrial dicarboxylate transporter	Q06143	27.8848	28.2522	28.3165	27.9727	14.4595	28.1022	28.2487	28.1356	27.9032	9.0514	0.00912149	0.945206
DID2	YKR035W-A	Vacuolar protein-sorting-associated protein 46	P69771	26.7375	26.421	26.7083	26.2007	17.1011	26.72	27.07	26.7918	26.4818	22.983	-0.24898	0.206234
DID4	YKL002W	DOA4-independent degradation protein 4	P36108	26.5925	26.0814	26.4445	26.0989	17.7588	26.8586	27.0427	26.7677	26.4852	11.9856	-0.484258	0.0307856
DIG1	YPL049C	Down-regulator of invasive growth 1	Q03063	28.0261	28.1056	28.1648	28.1177	3.96145	28.1468	28.1067	27.9971	28.1295	8.0491	0.00855186	0.853324
DIM1	YPL266W	Dimethyladenosine transferase	P41819	29.7033	29.7433	29.916	29.7828	6.53037	29.7952	29.964	29.8494	29.6374	7.2642	-0.0252013	0.769193
DIP2	YLR129W	U3 small nucleolar RNA-associated protein 12	Q12220	28.9103	29.0794	29.2564	29.1741	10.0979	28.9424	28.7848	29.0337	28.853	7.09966	0.201578	0.0707761
DIP5	YPL265W	Dicarboxylic amino acid permease	P53388	27.3767	27.3338	27.5571	27.3388	7.54732	27.062	27.1393	26.8774	27.0805	11.078	0.361811	0.00340313
DIS3	YOL021C	Exosome complex exonuclease DIS3	Q08162	30.3828	30.4623	30.4687	30.4117	2.84884	30.267	30.2728	30.4001	30.3096	2.64622	0.118985	0.0182405
DJP1	YIR004W	DnaJ-like protein 1	P40564	28.8673	28.8768	28.8833	29.0319	5.5712	28.626	28.689	28.6324	28.5444	5.08467	0.291901	0.00102195
DLD1	YDL174C	D-lactate dehydrogenase [cytochrome] 1, mitochondrial	P32891	29.6187	29.6488	29.7145	29.4987	6.1777	29.6951	29.7514	29.6479	29.5482	7.07781	-0.0404858	0.540384
DLD2	YDL178W	D-lactate dehydrogenase [cytochrome] 2, mitochondrial	P46681	30.0014	30.0615	30.0921	30.1045	3.15785	30.2457	30.1746	30.2047	30.0081	4.88743	-0.0934052	0.152253
DLD3	YEL071W	D-lactate dehydrogenase [cytochrome] 3	P39976	33.5292	33.6659	33.7688	33.5983	7.1268	33.7422	33.7038	33.7237	33.5269	1.2893	-0.033638	0.653539
DMA1	YHR115C	E3 ubiquitin-protein ligase DMA1	P38823	26.444	26.6451	26.7802	26.9978	16.1605	26.7941	26.0187	26.4925	26.8054	14.6452	0.189097	0.419281
DMA2	YNL116W	E3 ubiquitin-protein ligase DMA2	P53924	27.9593	27.8747	27.8507	27.95	3.74364	28.0628	27.9665	27.8672	27.9826	5.40828	-0.061074	0.253903
DML1	YMR211W	Protein DML1	Q03652	26.4774	26.5304	26.3099	26.7728	13.5052	26.6634	26.8925	26.7469	26.8903	9.61096	-0.275668	0.0477242
DNA2	YHR164C	DNA replication ATP-dependent helicase/nuclease DNA2;DNA replication nuclease DNA2;DNA replication ATP-dependent helicase DNA2	P38859	25.655	24.4289	24.479	25.0683	42.1534	25.2296	24.9317	24.9395	25.738	18.7188	-0.301891	0.414997
DNF1	YER166W	Phospholipid-transporting ATPase DNF1	P32660	28.8216	28.8578	28.484	28.8719	11.9876	28.8145	28.7079	28.8013	28.6733	7.65249	0.00955859	0.925881
DNF2	YDR093W	Phospholipid-transporting ATPase DNF2	Q12675	28.112	28.48	28.3311	28.3697	10.4065	28.2327	28.2454	28.2673	28.2575	3.10792	0.0724368	0.386102
DNF3	YMR162C	Probable phospholipid-transporting ATPase DNF3	Q12674	27.0023	27.317	27.0782	27.1664	9.51275	27.6477	27.3232	27.1359	27.101	12.2416	-0.160982	0.300878
DNM1	YLL001W	Dynamin-related protein DNM1	P54861	30.5945	30.4141	30.4649	30.5601	5.76496	30.6265	30.5821	30.6197	30.765	3.66769	-0.139945	0.0519566
DOA1	YKL213C	Protein DOA1	P36037	29.0876	29.0191	29.0519	28.9838	3.08112	29.0014	28.8759	28.7879	28.7406	5.95522	0.18416	0.0241341
DOA4	YDR069C	Ubiquitin carboxyl-terminal hydrolase 4	P32571	25.1784	24.7227	24.7098	25.0971	16.9787	25.1972	25.0221	24.7614	24.6551	16.5212	0.0180631	0.920689
DOG2;DOG1	DOG2;DOG1	2-deoxyglucose-6-phosphate phosphatase 2;2-deoxyglucose-6-phosphate phosphatase 1	P38773	29.389	29.1466	29.0938	29.3813	10.6534	29.1478	29.3285	29.274	29.3166	9.06713	-0.0140736	0.877657
DOM34	YNL001W	Protein DOM34	P33309	28.5188	28.1811	28.1317	28.034	15.3681	27.803	27.5776	27.6111	27.9656	17.146	0.477077	0.0138219
DOP1	YDR141C	Protein dopey	Q03921	30.7007	30.6469	30.7782	30.7252	3.77836	30.8488	30.7649	30.7391	30.7439	5.5071	-0.0613887	0.151164
DOS2	YDR068W	Protein DOS2	P54858	27.3716	26.9618	26.8953	27.2349	15.6707	27.437	27.3775	27.4525	27.3606	15.5907	-0.290992	0.0443018
DOT1	YDR440W	Histone-lysine N-methyltransferase, H3 lysine-79 specific	Q04089	27.7078	27.6683	27.524	28.2225	22.8142	28.1822	27.5156	27.863	27.8215	3.58171	-0.0649316	0.761684
DOT5	YIL010W	Peroxiredoxin DOT5	P40553	29.9856	29.9309	30.1036	29.8154	8.30316	30.0671	30.0384	29.8067	30.1374	5.39598	-0.0535148	0.587405
DOT6	YER088C	Transcriptional regulatory protein DOT6	P40059	29.5914	29.6677	29.7638	29.6733	4.90578	29.7264	29.5634	29.6784	29.5579	7.96092	0.0425367	0.467916
DPB2	YPR175W	DNA polymerase epsilon subunit B	P24482	26.553	26.7477	26.7098	27.0413	14.5878	26.9626	26.9012	26.8214	26.9989	6.87952	-0.158066	0.197441
DPB4	YDR121W	DNA polymerase epsilon subunit D	Q04603	27.9714	27.6387	27.5507	28.2039	21.2416	27.7802	28.0171	28.2533	28.1251	25.4801	-0.20275	0.306302
DPH1	YIL103W	Diphthamide biosynthesis protein 1	P40487	28.2063	27.7732	27.9853	28.0468	12.2535	28.0295	27.9793	28.1002	28.0527	9.45873	-0.0375127	0.70089
DPH2	YKL191W	Diphthamide biosynthesis protein 2	P32461	30.1679	30.5302	30.6176	30.3385	13.6902	30.4519	30.4017	30.5629	30.1105	6.35251	0.0318121	0.826971
DPH5	YLR172C	Diphthine synthase	P32469	30.1299	29.9086	29.8071	29.9096	9.70533	29.4117	29.5694	29.6597	29.6863	11.3071	0.357007	0.00818677
DPH6	YLR143W	Diphthine--ammonia ligase	Q12429	29.4193	29.1392	29.127	29.2354	9.64281	29.2055	29.3828	29.2654	29.1764	2.80552	-0.0272942	0.749163
DPL1	YDR294C	Sphingosine-1-phosphate lyase	Q05567	30.4189	30.026	30.2996	30.1986	11.3778	30.1261	29.9549	30.0675	29.9811	6.64731	0.203378	0.0691464
DPM1	YPR183W	Dolichol-phosphate mannosyltransferase	P14020	33.1508	32.8859	32.9985	33.0593	7.66146	33.156	33.2129	33.177	33.0972	3.65499	-0.137166	0.0643043
DPP1	YDR284C	Diacylglycerol pyrophosphate phosphatase 1	Q05521	26.6565	26.077	25.812	26.1472	25.8301	26.0424	25.36	25.8733	26.4847	15.8291	0.233049	0.454984
DPS1	YLL018C	Aspartate--tRNA ligase, cytoplasmic	P04802	34.6512	34.7582	34.7507	34.7213	3.33908	34.7385	34.6145	34.6715	34.5493	3.57172	0.0768841	0.15396
DRE2	YKR071C	Fe-S cluster assembly protein DRE2	P36152	29.1456	29.2504	29.267	29.246	3.75619	29.2562	29.306	29.3261	29.1718	6.66672	-0.0377762	0.424218
DRN1	YGR093W	CWF19-like protein DRN1	P53255	26.0421	26.8836	26.8917	26.3474	27.7016	25.9315	26.2961	26.3244	25.4787	26.4358	0.533513	0.113458
DRS1	YLL008W	ATP-dependent RNA helicase DRS1	P32892	30.8597	30.8093	30.7687	30.8374	2.70886	30.8793	30.9399	30.9813	30.8695	3.7005	-0.0987139	0.0238793
DRS2	YAL026C	Probable phospholipid-transporting ATPase DRS2	P39524	28.334	28.5705	28.5758	28.5785	8.0021	28.6572	28.5633	28.6697	28.456	6.56047	-0.0718549	0.392649
DSD1	YGL196W	D-serine dehydratase	P53095	26.7984	26.8711	26.7547	26.6598	6.09044	27.1097	26.8307	26.9736	26.9574	15.3931	-0.196854	0.034267
DSE4	YNR067C	Endo-1,3(4)-beta-glucanase 1	P53753	28.0836	27.9867	27.9905	28.2975	10.4656	28.1885	28.1567	28.1133	28.0913	8.63345	-0.0478853	0.551941
DSF2	YBR007C	Protein DSF2	P38213	25.8251	25.942	26.0028	26.3342	15.8536	26.0937	26.4311	26.3849	26.2823	14.4687	-0.271977	0.0856522
DSK2	YMR276W	Ubiquitin domain-containing protein DSK2	P48510	31.6958	31.5995	31.6357	31.8789	8.86299	31.952	32.0553	31.89	31.7667	13.7703	-0.213547	0.0486486
DSL1	YNL258C	Protein transport protein DSL1	P53847	27.4553	27.8918	28.2445	27.9355	21.7528	27.4597	28.2035	27.9637	27.4181	13.1979	0.120537	0.649265
DSS1	YMR287C	Exoribonuclease II, mitochondrial	P39112	25.3897	25.7082	25.353	25.3389	12.826	25.5897	25.8525	25.4957	25.5686	23.799	-0.179157	0.177334
DSS4	YPR017C	Protein DSS4	P32601	25.5412	24.3955	24.9574	25.7613	39.1581	25.1602	25.3309	25.5689	25.2543	16.0171	-0.164712	0.624478
DST1	YGL043W	Transcription elongation factor S-II	P07273	29.991	30.2427	30.2319	30.467	13.4115	30.5327	30.6495	30.4458	30.3215	14.0307	-0.254187	0.0772701
DTD1	YDL219W	D-tyrosyl-tRNA(Tyr) deacylase	Q07648	27.5032	27.1313	27.2694	26.7588	20.8405	27.7658	28.0673	27.4352	26.5524	11.4495	-0.289496	0.455116
DUG1	YFR044C	Cys-Gly metallodipeptidase DUG1	P43616	33.7245	33.4951	33.4103	33.5572	9.38059	33.604	33.6297	33.6596	33.647	6.40801	-0.0883075	0.238765
DUG2	YBR281C	Probable di- and tripeptidase DUG2	P38149	28.4813	28.75	28.748	28.6901	8.47094	28.7286	28.8178	28.7925	28.7069	4.61471	-0.0941349	0.219824
DUG3	YNL191W	Probable glutamine amidotransferase DUG3	P53871	25.9077	25.4663	25.6183	25.9652	16.1513	26.0388	26.0982	26.0881	26.2458	13.7571	-0.378371	0.0243948
DUN1	YDL101C	DNA damage response protein kinase DUN1	P39009	28.4445	28.4344	28.4608	28.6965	9.06057	28.7021	28.4871	28.6155	28.5383	6.52432	-0.0767154	0.365278
DUO1	YGL061C	DASH complex subunit DUO1	P53168	26.0348	25.6766	25.7423	25.9274	11.4847	25.8877	25.9096	25.5579	25.9429	34.7151	0.0207804	0.870151
DUR1,2	YBR208C	Urea amidolyase;Urea carboxylase;Allophanate hydrolase	P32528	28.6773	28.6572	29.0274	28.8714	12.3377	29.0386	28.978	28.6375	28.8776	12.7432	-0.0745566	0.570639
DUS1	YML080W	tRNA-dihydrouridine(16/17) synthase [NAD(P)(+)]	P53759	27.5542	26.7036	26.754	27.2325	28.7364	27.061	27.0379	27.2356	27.4785	19.1413	-0.142146	0.554454
DUS3	YLR401C	tRNA-dihydrouridine(47) synthase [NAD(P)(+)]	Q06053	30.1461	30.192	30.1447	30.2009	2.06033	30.1874	30.2093	30.2451	30.1415	8.1912	-0.0249088	0.379693
DUS4	YLR405W	tRNA-dihydrouridine(20a/20b) synthase [NAD(P)+]	Q06063	25.0061	24.4521	24.8849	24.5255	18.668	24.8687	25.4714	25.3222	25.9173	17.1184	-0.677764	0.0375637
DUT1	YBR252W	Deoxyuridine 5-triphosphate nucleotidohydrolase	P33317	30.2633	30.0612	30.1743	30.1624	5.71336	30.2275	30.2043	30.2586	30.6931	7.43811	-0.180561	0.19379
DYN1	YKR054C	Dynein heavy chain, cytoplasmic	P36022	28.9093	29.1052	29.0071	29.1812	8.14929	29.3004	29.1118	29.2909	29.1292	11.0377	-0.157375	0.0898116
DYN2	YDR424C	Dynein light chain 1, cytoplasmic	Q02647	26.8237	27.1562	26.9659	27.0646	9.75102	27.9158	27.3604	27.695	27.2196	22.2328	-0.545115	0.0199687
DYS1	YHR068W	Deoxyhypusine synthase	P38791	32.7589	32.6084	32.677	32.6834	4.27046	32.7259	32.5826	32.7733	32.7918	1.45615	-0.0364645	0.542193
EAF1	YDR359C	Chromatin modification-related protein EAF1	Q06337	27.2439	27.4385	27.4081	27.2954	6.35444	27.2884	27.3847	27.4356	27.1726	4.12321	0.0261452	0.735826
EAF3	YPR023C	Chromatin modification-related protein EAF3	Q12432	27.7206	27.7039	27.6551	27.8719	6.63873	27.9924	27.8485	27.9842	27.96	8.75452	-0.208411	0.0109835
EAF5	YEL018W	Chromatin modification-related protein EAF5	P39995	26.0809	26.1324	25.776	26.3037	14.7223	26.5255	26.5634	26.2621	26.1496	33.8735	-0.301895	0.0892777
EAF6	YJR082C	Chromatin modification-related protein EAF6	P47128	26.0129	26.8044	26.7357	26.3052	24.8188	26.5266	26.7608	26.428	26.3852	23.6654	-0.0605985	0.777217
EAP1	YKL204W	Protein EAP1	P36041	29.9304	29.9666	29.9936	29.9969	2.12091	30.0241	30.1241	30.0295	29.9439	2.22391	-0.058501	0.193343
EAR1	YMR171C	Protein EAR1	Q03212	25.29	24.2546	24.6295	24.6149	31.9332	24.4731	24.5694	24.5043	25.0705	12.7131	0.0429199	0.873001
EBP2	YKL172W	rRNA-processing protein EBP2	P36049	31.126	31.4396	31.3757	31.273	9.31744	31.2115	31.3149	31.2805	31.1881	8.28264	0.0548081	0.489783
EBS1	YDR206W	Protein EBS1	Q03466	24.1212					23.9537	24.2792		23.508	18.0088	0.207634
ECI1	YLR284C	3,2-trans-enoyl-CoA isomerase	Q05871	24.1875	24.4841	24.4093	24.169	10.9879	23.9836	24.2806	24.1603	24.4795	25.501	0.0864914	0.533021
ECM1	YAL059W	Shuttling pre-60S factor ECM1	P39715	28.1057	28.3114	28.527	28.2539	12.3008	28.4371	28.4905	28.515	28.1357	12.3508	-0.0950424	0.471963
ECM14	YHR132C	Putative metallocarboxypeptidase ECM14	P38836	29.4548	29.3022	29.4602	29.3512	5.39152	29.2739	29.4159	29.3544	29.3568	0.742926	0.0418356	0.423898
ECM15	YBL001C	UPF0045 protein ECM15	P35195	28.9071	29.0357	29.2905	29.2566	12.4745	29.2447	29.1981	28.8268	29.1599	15.1877	0.0151147	0.912486
ECM16	YMR128W	Probable ATP-dependent RNA helicase DHR1	Q04217	30.5775	30.7142	30.6793	30.7651	5.42782	30.6478	30.7812	30.7995	30.775	5.11452	-0.0668673	0.251634
ECM2	YBR065C	Pre-mRNA-splicing factor SLT11	P38241	26.9778	27.055	27.0348	27.2345	7.90262	27.0957	27.2412	27	26.988	7.17021	-0.00571411	0.945795
ECM21	YBL101C	Protein ECM21	P38167	28.092	27.9785	27.9766	27.8471	6.90948	28.0045	27.8183	28.1682	28.006	9.2102	-0.0256852	0.778454
ECM22	YLR228C	Sterol regulatory element-binding protein ECM22	Q05958	24.4011	24.8813	24.8487	24.8494	14.6592	24.9379	24.799	24.9522	25.0662	4.7315	-0.193659	0.178991
ECM25	YJL201W	Protein ECM25	P32525	27.0399	27.0424	27.1284	27.1037	3.08437	27.2455	27.1239	27.2587	27.4817	4.43882	-0.198864	0.043096
ECM29	YHL030W	Proteasome component ECM29	P38737	30.319	30.1795	30.238	30.1836	4.56623	30.187	30.1694	30.1834	30.2145	4.0621	0.0414709	0.266665
ECM30	YLR436C	Protein ECM30	Q06673	25.3955	24.9526	25.4432	25.4697	15.5099	25.5466	24.9196	25.4099	25.1829	11.3665	0.0504982	0.792519
ECM31	YBR176W	3-methyl-2-oxobutanoate hydroxymethyltransferase	P38122	27.1756	26.8298	26.7155	27.1208	15.2738	26.9834	26.7813	27.2425	27.2123	6.02316	-0.094463	0.56505
ECM32	YER176W	Putative ATP-dependent RNA helicase ECM32	P32644	26.8608	27.0551	26.9237	27.01	6.00517	27.1378	26.9767	27.3012	27.3248	4.03039	-0.222772	0.0515742
ECM33	YBR078W	Cell wall protein ECM33	P38248	33.2325	33.4865	33.0922	33.4253	12.3353	33.5635	33.3904	33.5969	33.339	6.36132	-0.163321	0.189515
ECM38	YLR299W	Gamma-glutamyltransferase;Gamma-glutamyltransferase heavy chain;Gamma-glutamyltransferase light chain	Q05902	25.3299	25.5776	25.9662	25.4407	20.3237	25.8936	26.327	26.0505	25.5978	14.7617	-0.38864	0.108205
ECM4	YKR076W	Glutathione S-transferase omega-like 2	P36156	27.8915	27.9301	27.9239	27.9938	2.98881	28.0633	28.22	27.9119	28.0634	10.8953	-0.129844	0.0984347
ECT1	YGR007W	Ethanolamine-phosphate cytidylyltransferase	P33412	26.4367	25.0376	26.1043	25.3915	42.8448	24.9638	25.5378	25.2092	26.0746	44.0009	0.296178	0.487519
EDC1	YGL222C	Enhancer of mRNA-decapping protein 1	P53080	26.3372	26.9733	26.5541	27.067	23.3149	26.8291	26.9114	26.5395	26.4475	30.9544	0.0510281	0.812314
EDC3	YEL015W	Enhancer of mRNA-decapping protein 3	P39998	29.4697	29.5441	29.4688	29.5299	2.74001	29.3972	29.4198	29.465	29.2394	8.17886	0.122776	0.0592682
EDE1	YBL047C	EH domain-containing and endocytosis protein 1	P34216	32.5139	32.611	32.6383	32.5871	3.66052	32.5464	32.513	32.511	32.4952	4.48282	0.071189	0.0481602
EFB1	YAL003W	Elongation factor 1-beta	P32471	35.5206	35.3662	35.3303	35.459	6.03549	35.4942	35.396	35.5136	35.4536	7.71851	-0.0453281	0.404649
EFG1	YGR271C-A	rRNA-processing protein EFG1	Q3E705	27.9838	27.9893	28.2212	28.2528	10.0488	27.9014	28.167	28.201	27.9016	12.934	0.0690148	0.55141
EFM1	YHL039W	N-lysine methyltransferase EFM1	P38732	27.6806	27.4686	27.6373	27.484	7.43145	27.4602	27.2977	27.2357	27.5715	8.21045	0.176342	0.107845
EFR3	YMR212C	Protein EFR3	Q03653	28.05	28.2516	28.1659	28.3725	9.44516	28.2261	28.3393	28.3027	28.2717	6.72246	-0.0749036	0.339589
EFT1	YOR133W	Elongation factor 2	P32324	37.2256	37.1635	37.2825	37.1844	3.66154	37.2243	37.2105	37.2176	37.2038	1.8995	-4.23064e-05	0.998783
EGD1	YPL037C	Nascent polypeptide-associated complex subunit beta-1	Q02642	32.3867	32.5909	32.7034	32.6927	9.81456	33.12	33.31	33.2005	32.7898	16.3473	-0.511667	0.00877373
EGD2	YHR193C	Nascent polypeptide-associated complex subunit alpha	P38879	33.4962	33.3623	33.6084	33.6415	8.58672	34.0035	34.106	34.0252	33.9086	14.0644	-0.483723	0.000660522
EGT2	YNL327W	Protein EGT2	P42835	24.2912	23.3615	23.6782	24.0583	27.7305	23.7889	23.1936	23.3982	24.2359	20.7785	0.193122	0.554079
EHD3	YDR036C	3-hydroxyisobutyryl-CoA hydrolase, mitochondrial	P28817	29.4225	29.4098	29.3861	29.4746	2.61124	29.6323	29.6202	29.682	29.7039	3.63752	-0.236367	0.000131544
EHT1	YBR177C	Medium-chain fatty acid ethyl ester synthase/esterase 2	P38295	31.6845	31.5491	31.5526	31.6542	4.82585	31.5581	31.4415	31.5106	31.6917	3.41153	0.0596017	0.382252
EIS1	YMR031C	Eisosome protein 1	Q05050	31.9595	32.0827	32.0568	31.9697	4.28503	32.0169	32.0137	32.03	31.9307	5.8761	0.0193409	0.631499
EKI1	YDR147W	Ethanolamine kinase	Q03764	22.6626	24.5912	24.1865	24.4578	44.931	24.9851	25.3655	23.7878	23.9405	33.3435	-0.545196	0.391419
ELF1	YKL160W	Transcription elongation factor 1	P36053	26.9636	27.2182	27.2481	27.1712	8.5697	26.7936	26.5011	26.6732	26.5849	61.8493	0.512038	0.00124857
ELG1	YOR144C	Telomere length regulation protein ELG1	Q12050	24.5278	24.25	24.6473	24.2876	13.3247	24.4492	24.989	24.8121	25.0362	19.6152	-0.393445	0.0532423
ELO1	YJL196C	Elongation of fatty acids protein 1	P39540	26.47	26.4718	26.891	26.442	15.9843	26.108	26.1204	25.9297	25.7395	13.9128	0.594276	0.00542047
ELP2	YGR200C	Elongator complex protein 2	P42935	29.9937	29.8814	29.9239	30.0132	4.22923	29.9747	29.9425	30.0376	30.0603	3.27236	-0.0507233	0.262444
ELP3	YPL086C	Elongator complex protein 3	Q02908	30.2129	29.9107	30.0173	30.0314	8.85127	29.9614	29.8145	30.0303	30.1625	6.58053	0.0509221	0.614196
ELP4	YPL101W	Elongator complex protein 4	Q02884	28.2374	28.5078	28.5366	28.3094	10.1288	28.396	28.4357	28.4032	28.344	8.60544	0.003046	0.969313
ELP6	YMR312W	Elongator complex protein 6	Q04868	27.3676	27.4277	27.5911	27.1265	13.0808	27.4382	27.3509	27.4394	26.9063	23.2256	0.0945543	0.575542
EMC1	YCL045C	ER membrane protein complex subunit 1	P25574	30.6293	30.331	30.3677	30.4044	9.66504	30.3817	30.3801	30.3318	30.3599	2.48954	0.0696762	0.345783
EMC2	YJR088C	ER membrane protein complex subunit 2	P47133	28.6041	28.1221	28.1472	28.3444	16.0283	28.0178	28.1565	28.2241	28.4472	11.6146	0.0930678	0.539487
EMC3	YKL207W	ER membrane protein complex subunit 3	P36039	26.9987	26.7584	26.8136	26.8669	7.25326	26.9303	26.7378	26.9533	26.0589	10.1124	0.189345	0.413626
EMC4	YGL231C	ER membrane protein complex subunit 4	P53073	29.2409	28.865	28.8299	28.9597	13.5225	28.8949	28.6357	28.8905	28.8949	6.14386	0.144857	0.248093
EMC5	YIL027C	ER membrane protein complex subunit 5	P40540	28.9049	29.2188	29.2445	29.1939	10.4019	29.1502	29.2638	29.1649	29.2639	24.4168	-0.0701927	0.44055
EMG1	YLR186W	Ribosomal RNA small subunit methyltransferase NEP1	Q06287	29.956	29.8601	30.077	29.8825	6.8978	29.9302	30.0052	29.9963	30.0636	4.52231	-0.054915	0.364539
EMI2	YDR516C	Putative glucokinase-2	Q04409	31.2523	31.3446	31.4315	31.1841	7.50366	31.1253	31.2335	31.1592	31.1483	6.67763	0.136534	0.0593548
EMP24	YGL200C	Endosomal protein P24B	P32803	30.6265	30.5355	30.614	30.4863	4.58462	30.3103	30.3058	30.1601	30.371	1.28624	0.278756	0.00245354
EMP46	YLR080W	Protein EMP46	Q12396	24.9499	24.9711	25.4305	25.0341	16.7255	25.6082	25.0101	24.8274	26.0623	24.2657	-0.280584	0.392297
EMP47	YFL048C	Protein EMP47	P43555	30.2449	30.0417	30.0419	30.0188	7.60124	30.0355	30.0411	30.0936	30.1461	6.03407	0.00772255	0.90008
EMP70	YLR083C	Transmembrane 9 superfamily member 1;Protein p24a	P32802	29.3138	29.3683	29.5469	29.3261	7.72461	29.4992	29.488	29.2744	29.4705	10.3714	-0.0442385	0.580762
EMW1	YNL313C	Essential for maintenance of the cell wall protein 1	P42842	29.7436	29.6113	29.6794	29.6907	3.75702	29.4982	29.5363	29.5824	29.7372	12.6635	0.0927404	0.167623
ENA5;ENA2	YDR038C	Sodium transport ATPase 5;Sodium transport ATPase 2	Q12691	30.2953	30.1158	30.0718	30.0559	7.86763	29.9379	30.0706	29.9475	30.1239	7.71759	0.114723	0.160564
ENB1	YOL158C	Siderophore iron transporter ENB1	Q08299	29.6247	29.2127	29.319	28.8751	21.218	28.7848	28.7934	28.8506	29.2699	24.5336	0.333217	0.135468
END3	YNL084C	Actin cytoskeleton-regulatory complex protein END3	P39013	29.5084	29.7008	30.0312	29.7064	15.51	29.5968	29.5093	29.5414	29.4124	4.33911	0.221712	0.102378
ENO1	YGR254W	Enolase 1	P00924	35.0346	34.5173	34.6304	34.6792	16.3113	34.7223	34.4277	34.4803	34.7294	10.6349	0.12543	0.394964
ENO2	YHR174W	Enolase 2	P00925	37.6572	37.7014	37.7703	37.763	3.69712	37.7745	37.8378	37.8121	37.7669	2.91138	-0.0748308	0.0552189
ENP1	YBR247C	Essential nuclear protein 1	P38333	30.1026	30.1187	30.3575	30.2108	8.28653	29.9509	29.9858	29.9784	30.0368	6.53209	0.209438	0.0140479
ENP2	YGR145W	Ribosome biogenesis protein ENP2	P48234	30.2438	30.3288	30.3571	30.2865	3.42538	30.217	30.3941	30.3593	30.1331	7.32173	0.0281856	0.683923
ENT1	YDL161W	Epsin-1	Q12518	27.4231	27.6297	27.3059	27.4225	9.54446	27.5665	27.4998	27.3992	27.4667	5.61857	-0.0377192	0.636568
ENT2	YLR206W	Epsin-2	Q05785	29.527	29.5299	29.5917	29.4925	2.8811	29.4677	29.6117	29.4769	29.4325	4.1634	0.0380771	0.424457
ENT3	YJR125C	Epsin-3	P47160	30.5145	30.5281	30.4093	30.5517	4.2853	30.2832	30.3824	30.2601	30.4177	3.60456	0.165062	0.0155624
ENT4	YLL038C	Epsin-4	Q07872	27.2024	27.076	27.862	27.2602	26.5807	27.806	27.8081	27.6443	27.4744	19.1899	-0.333055	0.133656
ENT5	YDR153C	Epsin-5	Q03769	29.2615	29.1708	29.1529	29.2119	3.36612	29.2484	29.3381	29.2439	29.0361	3.56418	-0.0173734	0.807934
ENV10	YLR065C	Late endosome and vacuole interface protein 10	Q99382	24.9993	25.4546	25.6507	25.2952	18.6009	25.4762	25.1378	25.0031	24.7926	10.873	0.247513	0.259544
ENV7	YPL236C	Serine/threonine-protein kinase ENV7	Q12003	23.5213	23.9699	24.0881	23.9864	16.1344	23.7137	23.3457	24.383	23.9719	23.2096	0.0378785	0.885488
ENV9	YOR246C	Probable oxidoreductase ENV9	Q08651	26.8124	26.1368	25.9786	26.3364	26.6319	26.4801	26.1007	26.3204	26.7557	18.7198	-0.0981795	0.681072
EPL1	YFL024C	Enhancer of polycomb-like protein 1	P43572	30.9058	31.1263	30.6837	30.9788	12.5401	31.1085	30.9921	30.8246	30.7004	7.13619	0.0172549	0.897871
EPS1	YIL005W	ER-retained PMA1-suppressing protein 1	P40557	29.8403	29.7051	29.769	29.7451	3.96479	29.6304	29.6583	29.7223	29.7532	9.2229	0.0737979	0.114997
EPT1	YHR123W	Choline/ethanolaminephosphotransferase 1	P22140	26.4954	26.5385	26.6994	26.3275	10.5705	26.9611	26.5725	26.1055	26.6026	20.5405	-0.0452357	0.821015
ERB1	YMR049C	Ribosome biogenesis protein ERB1	Q04660	31.304	31.3214	31.2507	31.1985	3.82879	31.2775	31.4095	31.4309	31.3125	5.65558	-0.0889683	0.103332
ERG1	YGR175C	Squalene monooxygenase	P32476	30.8464	31.0746	31.0284	31.0223	6.75844	30.9765	31.0602	30.9668	30.9054	3.16184	0.0157053	0.800502
ERG10	YPL028W	Acetyl-CoA acetyltransferase	P41338	34.0143	34.0194	33.9862	34.054	1.93204	33.9125	34.1246	33.9182	33.9971	2.77342	0.0303512	0.576054
ERG11	YHR007C	Lanosterol 14-alpha demethylase	P10614	30.9234	30.5328	30.6276	30.6375	12.204	30.4806	30.5256	30.6003	30.585	3.86358	0.132443	0.186393
ERG12	YMR208W	Mevalonate kinase	P07277	30.2138	29.947	30.0111	30.0426	8.09549	29.9757	29.7765	30.1004	30.0362	5.45923	0.0814351	0.401807
ERG13	YML126C	Hydroxymethylglutaryl-CoA synthase	P54839	34.2223	34.1989	34.2586	34.331	4.03918	34.0551	34.0902	34.11	34.2034	3.53119	0.138004	0.0181062
ERG2	YMR202W	C-8 sterol isomerase	P32352	29.8266	29.863	29.9642	30.148	10.2531	29.6407	28.974	29.6607	29.3052	26.9948	0.555288	0.0204087
ERG20	YJL167W	Farnesyl pyrophosphate synthase	P08524	32.7939	32.1885	32.4369	32.4277	17.7872	32.5074	32.5941	32.4926	32.7601	8.24636	-0.126791	0.397024
ERG26	YGL001C	Sterol-4-alpha-carboxylate 3-dehydrogenase, decarboxylating	P53199	30.4453	30.4652	30.4245	30.5362	3.40137	30.3377	30.2237	30.3265	30.228	10.1182	0.188853	0.00294004
ERG27	YLR100W	3-keto-steroid reductase	Q12452	30.4142	30.1706	30.2363	30.2991	7.26323	29.8488	29.9998	30.1296	30.1849	3.92169	0.23922	0.0391852
ERG28	YER044C	Ergosterol biosynthetic protein 28	P40030	27.1756	27.3162	27.2431	27.1769	4.67487	26.9623	26.9402	26.9809	26.5597	11.2319	0.367165	0.0134476
ERG3	YLR056W	C-5 sterol desaturase	P32353	29.8471	29.6509	29.4342	29.5825	12.012	29.6142	29.5655	29.651	29.5053	15.0381	0.0446885	0.64203
ERG4	YGL012W	Delta(24(24(1)))-sterol reductase	P25340	29.7974	30.0878	30.1012	30.0041	9.36055	29.7963	29.8225	30.0449	29.7236	5.59012	0.150798	0.176891
ERG5	YMR015C	Cytochrome P450 61	P54781	29.4252	29.4718	29.8104	29.5783	12.3291	29.5957	29.5938	29.5246	29.4677	6.88549	0.0259798	0.785317
ERG6	YML008C	Sterol 24-C-methyltransferase	P25087	33.4298	33.3772	33.5	33.4013	3.72028	32.936	33.1456	33.0756	33.2469	5.62644	0.326062	0.00359029
ERG8	YMR220W	Phosphomevalonate kinase	P24521	30.1005	30.0241	29.8812	29.9811	6.30281	29.8005	29.8726	29.9513	29.9347	5.37021	0.106971	0.110322
ERG9	YHR190W	Squalene synthase	P29704	30.8453	30.9446	30.8855	30.9195	2.9769	30.8046	30.8898	30.842	30.7964	2.17443	0.06556	0.073831
ERJ5	YFR041C	ER-localized J domain-containing protein 5	P43613	29.4463	29.1798	29.355	29.178	9.3099	29.2379	29.2128	29.2381	29.4933	9.20109	-0.00572579	0.953386
ERO1	YML130C	Endoplasmic oxidoreductin-1	Q03103	28.9519	28.7044	28.7939	28.7255	7.96893	28.6983	28.4765	28.6613	28.7947	8.9579	0.136257	0.168553
ERP1	YAR002C-A	Protein ERP1	Q05359	30.9195	30.8504	30.7769	30.8932	4.27631	30.7923	30.5566	30.675	30.6693	4.05474	0.186709	0.0173098
ERP2	YAL007C	Protein ERP2	P39704	29.0034	28.9995	29.0901	29.0895	3.53688	29.0578	28.639	28.9627	29.2553	13.9173	0.0668915	0.628133
ERP3	YDL018C	Protein ERP3	Q12403	27.8479	26.8506	26.7912	27.4204	35.7734	27.1122	26.8983	27.285	27.4191	23.1067	0.0488596	0.864767
ERP4	YOR016C	Protein ERP4	Q12450	26.4001		25.6297	26.5862	31.6079	26.5366		26.0753	26.3467	41.753	-0.11417	0.74076
ERP5	YHR110W	Protein ERP5	P38819	26.4543	26.8099	26.2687	26.8018	18.086	26.7806	26.377	26.7964	26.0447	7.78576	0.0839967	0.720912
ERR3;ERR2;ERR1	YMR323W	Enolase-related protein 3;Enolase-related protein 2;Enolase-related protein 1	P42222	27.2222	25.7746	23.4265	25.8796	85.003	26.8967	26.9992	25.6286	25.4294	60.3116	-0.662716	0.484527
ERV1	YGR029W	Mitochondrial FAD-linked sulfhydryl oxidase ERV1	P27882	27.6386	27.4948	27.5842	27.7849	8.54062	27.6935	27.7652	27.7768	27.5056	12.3793	-0.0596369	0.520119
ERV2	YPR037C	FAD-linked sulfhydryl oxidase ERV2	Q12284	27.7835	27.9837	28.2508	27.9465	13.7653	27.5833	27.8965	27.6861	27.4373	18.9846	0.340337	0.0472239
ERV25	YML012W	Endoplasmic reticulum vesicle protein 25	P54837	31.3488	31.2328	31.3842	31.2073	5.99067	31.2626	31.1471	31.2078	31.2013	6.51527	0.0885587	0.122171
ERV29	YGR284C	ER-derived vesicles protein ERV29	P53337	29.1177	28.9176	28.7734	28.9947	9.93809	28.9164	28.679	28.7667	28.955	9.4901	0.121551	0.255563
ERV41	YML067C	ER-derived vesicles protein ERV41	Q04651	28.7252	28.5455	28.5799	28.5425	6.13919	28.6598	28.523	28.7123	28.7378	7.78679	-0.0599397	0.388412
ERV46	YAL042W	ER-derived vesicles protein ERV46	P39727	30.7824	31.2623	31.4405	31.0769	18.9324	31.1187	31.1279	31.129	30.8143	8.95652	0.093038	0.58356
ESA1	YOR244W	Histone acetyltransferase ESA1	Q08649	26.445	25.6555	24.7811	25.1026	53.4506	26.1463	24.9924	26.143	26.1546	30.463	-0.363003	0.46459
ESC1	YMR219W	Silent chromatin protein ESC1	Q03661	32.0229	32.3157	32.0481	32.0877	9.66682	32.1963	32.1204	32.1731	32.0345	4.77465	-0.0124372	0.875446
ESF1	YDR365C	Pre-rRNA-processing protein ESF1	Q06344	30.6811	30.5578	30.6021	30.5045	5.20781	30.4723	30.6868	30.5979	30.6524	10.2032	-0.0159595	0.799426
ESF2	YNR054C	Pre-rRNA-processing protein ESF2	P53743	29.0161	29.2945	29.4508	29.0082	15.2706	29.0167	29.2137	29.0548	28.918	11.3011	0.141584	0.300672
ESS1	YJR017C	Peptidyl-prolyl cis-trans isomerase ESS1	P22696	30.344	30.9829	30.8887	30.6477	18.9196	30.9276	31.1794	30.8653	30.5476	12.4088	-0.164126	0.427606
ETR1	YBR026C	Enoyl-[acyl-carrier protein] reductase [NADPH, B-specific], mitochondrial	P38071	31.404	31.1023	31.2677	31.1304	9.781	31.0856	31.0842	31.0351	31.1237	3.02577	0.14395	0.091688
ETT1	YOR051C	Enhancer of translation termination 1	Q08421	30.5095	30.3466	30.5752	30.4498	6.67034	30.441	30.4385	30.2442	30.4631	6.3293	0.0735564	0.337016
EUG1	YDR518W	Protein disulfide-isomerase EUG1	P32474	29.264	29.0419	29.2228	29.2381	6.79257	29.3118	29.1148	29.2164	29.1086	4.54411	0.00378262	0.95858
EXG1	YLR300W	Glucan 1,3-beta-glucosidase I/II	P23776	30.9182	30.7546	30.8507	30.7705	5.29729	30.7936	30.6926	30.6735	30.776	9.9593	0.0895746	0.11285
EXG2	YDR261C	Glucan 1,3-beta-glucosidase 2	P52911	27.3252	27.2038	27.6876	27.2332	16.4179	26.506	26.7008	26.4432	26.373	9.25092	0.856691	0.000632083
EXO70	YJL085W	Exocyst complex component EXO70	P19658	28.2021	28.0861	28.2862	28.2137	5.67278	28.6034	28.276	28.4397	28.2792	8.87272	-0.202542	0.0615216
EXO84	YBR102C	Exocyst complex component EXO84	P38261	28.0431	27.78	27.8877	27.9649	7.72713	28.0917	27.8791	28.0121	28.0843	5.53698	-0.0978727	0.238023
FAA1	YOR317W	Long-chain-fatty-acid--CoA ligase 1	P30624	33.8298	33.7348	33.8187	33.636	6.13534	33.7534	33.6008	33.6564	33.6465	6.52867	0.0905505	0.152095
FAA3	YIL009W	Long-chain-fatty-acid--CoA ligase 3	P39002	27.3403	27.4273	27.6621	27.533	9.69801	27.8272	27.8567	27.6265	27.8461	12.5331	-0.298493	0.0148433
FAA4	YMR246W	Long-chain-fatty-acid--CoA ligase 4	P47912	32.7302	32.5788	32.5022	32.7001	7.31088	32.6176	32.5814	32.6442	32.5907	2.31201	0.0193829	0.736545
FAB1	YFR019W	1-phosphatidylinositol 3-phosphate 5-kinase FAB1	P34756	27.2013	27.5051	26.8088	27.2964	19.2929	27.6028	27.7846	26.8708	27.5313	4.896	-0.244442	0.360754
FAD1	YDL045C	FAD synthase	P38913	26.4592	26.4599	26.3607	26.7221	11.1432	26.6407	26.6875	26.5916	26.5455	4.51356	-0.115885	0.213629
FAL1	YDR021W	ATP-dependent RNA helicase FAL1	Q12099	27.2385	26.8623	26.9733	26.9709	11.5004	26.9553	27.2605	26.7558	26.9769	6.20624	0.0241166	0.860101
FAP1	YNL023C	FKBP12-associated protein 1	P53971	24.8905	25.3022	25.276	24.8225	17.2686	26.2416	26.1429	25.9629	26.4474	15.7204	-1.12595	0.000429856
FAP7	YDL166C	Adenylate kinase isoenzyme 6 homolog FAP7	Q12055	28.7149	28.379	28.4061	28.7437	13.4645	28.5157	28.4504	28.4556	28.6455	11.4564	0.0441485	0.695809
FAR10	YLR238W	Factor arrest protein 10	Q06001	25.8341	26.899	26.757	26.2817	31.3787	26.519	26.7357	26.7214	26.1047	14.0259	-0.0772827	0.794124
FAR11	YNL127W	Factor arrest protein 11	P53917	26.1509	27.0826	27.0082	26.6776	26.7831	27.0492	26.8942	26.9591	27.1182	14.9489	-0.275358	0.25292
FAR8	YMR029C	Factor arrest protein 8	Q05040	28.7873	28.9601	29.1695	28.7056	14.5469	28.7217	28.6112	28.6496	28.6798	0.889509	0.240097	0.0628595
FAS1	YKL182W	Fatty acid synthase subunit beta;3-hydroxyacyl-[acyl-carrier-protein] dehydratase;Enoyl-[acyl-carrier-protein] reductase [NADH];[Acyl-carrier-protein] acetyltransferase;[Acyl-carrier-protein] malonyltransferase;S-acyl fatty acid synthase thioesterase	P07149	36.5547	36.4242	36.5288	36.4892	3.90519	36.3708	36.3956	36.4538	36.4945	4.57096	0.0705696	0.127179
FAS2	YPL231W	Fatty acid synthase subunit alpha;Acyl carrier;3-oxoacyl-[acyl-carrier-protein] reductase;3-oxoacyl-[acyl-carrier-protein] synthase	P19097	36.5439	36.4923	36.5116	36.48	1.94039	36.4142	36.5076	36.4887	36.4428	3.48118	0.0435986	0.137541
FAT1	YBR041W	Very long-chain fatty acid transport protein	P38225	28.6299	28.739	28.4975	28.554	7.31387	28.4965	28.5523	28.6665	28.3435	11.6392	0.0903935	0.328767
FAU1	YER183C	5-formyltetrahydrofolate cyclo-ligase	P40099	26.606	26.7543	26.9327	25.9693	26.0166	27.1013	26.4465	26.6237	25.8684	32.8008	0.0556064	0.871678
FBA1	YKL060C	Fructose-bisphosphate aldolase	P14540	36.7699	36.7231	36.8101	36.8367	3.41836	36.7594	36.8866	36.8288	36.9199	4.85989	-0.0637216	0.189279
FBP26	YJL155C	Fructose-2,6-bisphosphatase	P32604	29.191	28.8534	28.9873	29.0012	9.76114	28.9425	28.6867	28.9441	28.7923	5.67047	0.166827	0.124813
FCF1	YDR339C	rRNA-processing protein FCF1	Q05498	24.9232	23.5886	23.9173	24.3438	41.274	24.5339	24.4392	24.7039	24.9045	19.4166	-0.452154	0.189841
FCF2	YLR051C	rRNA-processing protein FCF2	Q12035	28.6742	28.1082	28.2343	28.131	19.6915	27.967	28.3967	28.1818	28.396	15.2983	0.0515754	0.768237
FCP1	YMR277W	RNA polymerase II subunit A C-terminal domain phosphatase	Q03254	26.9829	26.8295	26.75	26.9612	7.59536	26.9437	26.6209	26.6079	27.0278	6.60209	0.0808402	0.531695
FCY1	YPR062W	Cytosine deaminase	Q12178	30.1209	29.9044	29.5834	30.0226	15.3874	30.5043	30.2775	30.38	30.4637	7.12968	-0.498564	0.00779533
FCY2	YER056C	Purine-cytosine permease FCY2	P17064	26.0053	26.4986	26.3005	26.209	14.1619	26.6994	26.6016	26.5107	26.0912	14.7199	-0.22237	0.235094
FDC1	YDR539W	Ferulic acid decarboxylase 1	Q03034	28.2505	28.0884	28.152	28.3358	7.57258	28.4004	28.4319	28.4292	28.3813	12.192	-0.204038	0.0106031
FDH1	YOR388C	Formate dehydrogenase 1	Q08911	23.6221	25.0439		22.8166	78.5917	23.8493	23.5862	26.2822	25.0774	91.3949	-0.871209	0.384059
FEN1	FEN1	Elongation of fatty acids protein 2	P25358	28.7405	29.0271	28.8722	28.6823	10.7994	29.1859	28.7061	28.556	28.6585	21.9536	0.0539109	0.747
FES1	YBR101C	Hsp70 nucleotide exchange factor FES1	P38260	28.5928	28.2845	28.4006	28.329	9.7145	28.7216	28.585	28.7082	28.497	19.7215	-0.226229	0.0397963
FET3	YMR058W	Iron transport multicopper oxidase FET3	P38993	31.9137	31.7241	31.7593	32.0312	9.97088	31.6521	31.6852	31.7871	31.7307	9.82226	0.143282	0.111901
FET4	YMR319C	Low-affinity Fe(2+) transport protein	P40988	26.8804	26.9181	27.0046	27.1502	8.47203	27.6024	26.9707	27.2074	27.5985	13.5669	-0.356416	0.0760418
FET5	YFL041W	Iron transport multicopper oxidase FET5	P43561	30.3321	30.3488	30.4186	30.3286	2.9469	30.2566	30.3629	30.3301	30.3748	7.34466	0.0259236	0.472845
FHL1	YPR104C	Pre-rRNA-processing protein FHL1	P39521	27.3397	26.9914	26.73	27.0832	17.3994	27.304	27.1043	27.0317	27.162	7.97513	-0.114421	0.440172
FIG4	YNL325C	Polyphosphoinositide phosphatase	P42837	25.5808	25.3775	26.0639	25.1069	29.1875	25.5679	25.1966	24.6609	23.8608	20.3913	0.710733	0.143086
FIP1	YJR093C	Pre-mRNA polyadenylation factor FIP1	P45976	27.3028	27.2337	27.2749	27.06	7.32069	27.1352	27.3405	26.9982	27.5556	9.24391	-0.0395014	0.777139
FIR1	YER032W	Factor interacting with REF2	P40020	25.3947	26.375	26.6619	26.2829	32.5827	25.8881	26.1276	26.1313	26.3657	32.5449	0.0504442	0.867789
FIS1	YIL065C	Mitochondria fission 1 protein	P40515	25.3098	25.2257	25.8592	25.6905	21.0133	26.1007	25.9649	26.1747	26.0341	30.1654	-0.547322	0.0133569
FIT2	YOR382W	Facilitator of iron transport 2	Q08906	24.6185	23.909	24.3922	24.3	19.654	23.378	25.2311	25.0986	23.7149	33.1623	-0.0506825	0.921878
FIT3;FIT1	YOR383C	Facilitator of iron transport 3;Facilitator of iron transport 1	Q08907	23.6721	24.202	23.9421	23.6273	19.0039	23.6903	22.8931		23.0367	22.6332	0.654173	0.0527004
FKH1	YIL131C	Fork head protein homolog 1	P40466	26.8433	26.8656	26.723	27.0513	9.55592	26.5543	27.1173	27.1317	26.8544	12.4324	-0.0436294	0.783618
FKH2	YNL068C	Fork head protein homolog 2	P41813	28.2064	28.3164	28.0021	28.2351	8.98921	28.2928	28.2857	28.225	28.3775	11.2294	-0.105254	0.203742
FKS1	YLR342W	1,3-beta-glucan synthase component FKS1	P38631	33.2527	33.0406	33.0522	33.2178	7.62725	33.0986	33.0797	33.1631	33.1618	3.56294	0.0150471	0.807438
FLC1	YPL221W	Flavin carrier protein 1	Q08967	27.9878	28.1448	28.1586	28.1186	5.2912	28.2918	28.1341	27.9516	27.843	7.96204	0.0473294	0.672543
FLC2	YAL053W	Flavin carrier protein 2	P39719	27.939	27.9834	27.7665	28.0481	8.13714	27.9505	27.838	27.9315	27.8289	7.6714	0.0470175	0.514516
FLC3	YGL139W	Putative flavin carrier protein 3	P53121	26.8746	26.9557	26.5896	26.828	10.5038	26.7218	26.6216	27.0768	26.8923	7.86415	-0.016157	0.903086
FMC1	YIL098C	ATP synthase assembly factor FMC1, mitochondrial	P40491	23.7914	23.9755	23.8616	24.3673	18.9504	25.2201	24.1776	24.7629	25.3342	19.5869	-0.874742	0.0243218
FMN1	YDR236C	Riboflavin kinase	Q03778	28.293	28.0277	28.296	28.1157	9.16564	27.5019	27.3846	27.5208	27.4496	8.99622	0.718871	6.53507e-05
FMO1	YHR176W	Thiol-specific monooxygenase	P38866	23.9939	23.8035	23.5097	24.4072	26.6646	24.3422		24.8252	24.2422	36.8689	-0.541306	0.100069
FMP10	YER182W	Uncharacterized mitochondrial membrane protein FMP10	P40098	26.5331	26.5143	26.6417	26.3628	7.86737	26.8259	26.7734	26.8625	26.8284	11.8329	-0.309583	0.00214259
FMP21	YBR269C	Protein FMP21, mitochondrial	P38345			22.524				22.9814			18.9157	-0.457395
FMP25	YLR077W	Protein FMP25, mitochondrial	Q08023	26.9391	27.206	27.2404	27.2056	9.25073	27.1045	27.1666	26.9597	26.8679	13.2567	0.12309	0.253834
FMP27	YLR454W	Protein FMP27, mitochondrial	Q06179	29.1207	28.9925	28.9002	29.2178	9.68936	29.4158	29.1533	29.153	29.4494	10.7346	-0.235095	0.070314
FMP30	YPL103C	N-acyl-phosphatidylethanolamine-hydrolyzing phospholipase D, mitochondrial	Q02883	26.6561	25.8899	25.579	26.1861	32.5588	26.4453	25.9577	26.3609	26.4903	16.9352	-0.235762	0.398521
FMP32	YFL046W	Protein FMP32, mitochondrial	P43557	27.6216	27.6057	27.4751	26.7572	24.6242	27.8746	27.9399	27.8257	27.7972	35.6503	-0.494442	0.0546099
FMP33	YJL161W	Mitochondrial membrane protein FMP33	P46998	21.2426	22.1788	22.9174	22.1421	45.3268	22.0023	21.8037	23.8097		18.0489	-0.418317	0.560038
FMP37	YGL080W	Mitochondrial pyruvate carrier 1	P53157						22.9978		23.0473		22.0163
FMP40	YPL222W	UPF0061 protein FMP40	Q08968	26.5421	26.4554	26.6983	26.6039	7.1023	26.4697	26.765	26.6253	26.9014	4.55641	-0.115418	0.317364
FMP41	YNL168C	Uncharacterized mitochondrial hydrolase FMP41	P53889	29.3987	29.3393	29.3804	29.3966	1.89344	29.6291	29.5854	29.4767	29.6095	9.74604	-0.196415	0.00173738
FMP42	YMR221C	Protein FMP42	Q04991	25.9147	26.484	26.6956	26.804	24.7593	26.3562	26.3506	26.6231	25.9371	16.5351	0.157836	0.540911
FMP46	YKR049C	Putative redox protein FMP46, mitochondrial	P36141	25.8538	25.5958	24.5054	22.2607	72.3294	23.0393	21.849	25.3743	25.3678	84.2439	0.646326	0.609862
FMP52	YER004W	Protein FMP52, mitochondrial	P40008	29.6674	29.9542	29.9094	30.0418	10.7006	29.9289	30.031	29.9952	29.9584	7.97511	-0.0851668	0.345145
FMS1	YMR020W	Polyamine oxidase FMS1	P50264	27.7443	27.3838	27.1618	27.4017	17.1525	27.2256	27.447	27.3608	27.5711	26.3835	0.0217735	0.881923
FMT1	YBL013W	Methionyl-tRNA formyltransferase, mitochondrial	P32785	24.967	24.0258	24.7863	25.2621	32.4896	25.5625	25.3829	25.108	25.6067	24.1876	-0.654739	0.0626922
FOL1	YNL256W	Folic acid synthesis protein FOL1;Dihydroneopterin aldolase;2-amino-4-hydroxy-6-hydroxymethyldihydropteridine pyrophosphokinase;Dihydropteroate synthase	P53848	28.9276	28.8159	28.8219	28.6279	8.461	28.7426	28.7134	28.7549	28.7984	5.61137	0.0460125	0.504219
FOL2	YGR267C	GTP cyclohydrolase 1	P51601	30.2166	30.1663	30.3407	30.3103	5.59892	30.3598	30.4911	30.4286	30.5136	9.77827	-0.189816	0.0118592
FOL3	YMR113W	Dihydrofolate synthetase	Q12676	28.0262	28.0497	27.808	28.0489	7.80474	28.0931	27.9938	27.9998	28.3611	6.51598	-0.128752	0.262726
FPK1	YNR047W	Flippase kinase 1	P53739	27.6455	28.0087	28.1216	27.6925	16.2429	27.793	27.7165	27.8921	27.7134	5.24113	0.0883135	0.504305
FPR1	YNL135C	FK506-binding protein 1	P20081	33.9077	33.9369	33.8284	33.9781	4.3442	34.2915	34.4038	34.2465	34.3246	18.405	-0.403813	0.000118568
FPR2	YDR519W	Peptidyl-prolyl cis-trans isomerase FPR2	P32472	29.5159	29.9224	29.914	29.858	12.5395	29.7349	29.8846	29.7688	29.6697	4.82893	0.0380538	0.733283
FPR3	YML074C	FK506-binding nuclear protein	P38911	32.3182	32.4658	32.475	32.4134	4.90487	32.5314	32.8665	32.5033	32.3855	8.82855	-0.153563	0.209717
FPR4	YLR449W	FK506-binding protein 4	Q06205	30.7767	30.7388	30.7151	30.831	3.52714	30.8946	30.9463	31.0435	30.8542	9.45308	-0.169262	0.0125102
FPS1	YLL043W	Glycerol uptake/efflux facilitator protein	P23900	26.8463	27.1077	27.3211	27.0627	13.4784	27.0563	27.1401	27.0052	26.908	9.12252	0.0570273	0.618976
FRA1	YLL029W	Putative Xaa-Pro aminopeptidase FRA1	Q07825	30.5496	30.5151	30.4869	30.4868	2.0756	30.4839	30.4982	30.4252	30.373	4.06622	0.0645346	0.0934094
FRA2	YGL220W	Fe repressor of activation 2	P53082	24.408	24.6503	25.2752	23.649	44.6594	24.0794	24.0701	23.6387	24.0203	34.1968	0.543495	0.173816
FRD1	YEL047C	Fumarate reductase 1	P32614	32.5282	32.3827	32.4237	32.459	4.30097	32.7251	32.5961	32.5718	32.7648	5.9107	-0.216083	0.00875733
FRE1	YLR214W	Ferric/cupric reductase transmembrane component 1	P32791	30.3334	30.3376	30.3642	30.1763	5.76207	29.9463	29.8713	29.9779	30.2092	7.55403	0.301714	0.0117615
FRE2	YKL220C	Ferric/cupric reductase transmembrane component 2	P36033	29.4737	28.9809	29.2806	29.2691	13.7294	29.0211	28.6516	28.7033	29.1264	21.2871	0.375478	0.0515123
FRE3	YOR381W	Ferric reductase transmembrane component 3	Q08905	24.3074	24.6694	24.31	24.6956	14.9008	24.0763	24.6476	24.9478	24.0352	19.8077	0.0688785	0.79032
FRE5	YOR384W	Ferric reductase transmembrane component 5	Q08908	25.1299	25.9715	25.6693	25.9841	25.0596	25.4845	25.7174	25.9474	25.5593	13.8968	0.0115864	0.960537
FRK1	YPL141C	Fatty acyl-CoA synthetase and RNA processing-associated kinase 1	Q03002	25.251	25.5463	25.6552	25.253	14.3509	25.5641	25.6398	25.7518	26.6158	44.8696	-0.466541	0.128715
FRQ1	YDR373W	Calcium-binding protein NCS-1	Q06389	26.1573	25.6901	26.3699	25.6822	24.0586	26.0826	26.3123	26.2511	26.6231	19.9906	-0.342384	0.147517
FRS1	YLR060W	Phenylalanine--tRNA ligase beta subunit	P15624	33.831	33.6187	33.6617	33.601	7.50068	33.5585	33.5878	33.7014	33.7664	2.96583	0.0245824	0.743043
FRS2	YFL022C	Phenylalanine--tRNA ligase alpha subunit	P15625	33.3422	33.2236	33.4983	33.4223	8.06292	33.4776	33.4013	33.4512	33.2581	4.32648	-0.0254786	0.750277
FSF1	YOR271C	Probable mitochondrial transport protein FSF1	Q12029	30.9434	30.8709	30.8779	30.8074	3.85451	30.8112	30.7538	30.7171	30.7558	6.01437	0.115402	0.0143977
FSH1	YHR049W	Family of serine hydrolases 1	P38777	30.0724	29.8965	29.9307	30.2058	9.97491	30.2518	30.3583	30.3678	30.2094	3.00664	-0.27045	0.0156641
FSH2	YMR222C	Family of serine hydrolases 2	Q05015	27.8709	28.2571	28.2124	28.0014	12.3873	28.0123	28.682	28.0627	27.8038	29.5595	-0.0547632	0.802721
FSH3	YOR280C	Family of serine hydrolases 3	Q99369	28.6974	28.5802	28.577	28.7479	5.96338	28.4766	28.6667	28.5988	28.5431	4.64981	0.079335	0.22674
FTH1	YBR207W	Iron transporter FTH1	P38310	27.5472	27.9326	27.8359	28.0319	13.8599	27.6106	27.7218	27.6326	27.6454	15.8762	0.184281	0.136679
FTR1	YER145C	Plasma membrane iron permease	P40088	29.8742	30.0875	30.1758	29.7862	12.5325	29.6446	29.5366	29.4918	29.7722	21.8455	0.36964	0.0152876
FUI1	YBL042C	Uridine permease	P38196	26.4221	26.455	25.9555	26.173	15.7179	26.8393	26.4788	26.7945	26.9101	35.1921	-0.504263	0.0155889
FUM1	YPL262W	Fumarate hydratase, mitochondrial	P08417	32.2663	32.075	32.1472	32.3209	7.71235	32.2946	32.2657	32.283	32.2888	5.01818	-0.0806501	0.201234
FUN12	YAL035W	Eukaryotic translation initiation factor 5B	P39730	33.513	33.6041	33.6173	33.4561	5.27898	33.4983	33.5868	33.5788	33.5106	3.83836	0.00399282	0.931557
FUN14	YAL008W	Protein FUN14	P18411	25.2043	24.946	24.7956	25.1533	12.8875	24.5736	24.7354	24.829	24.8921	27.7074	0.267253	0.0628812
FUN19	YAL034C	SWIRM domain-containing protein FUN19	P28003
FUN30	YAL019W	ATP-dependent helicase FUN30	P31380	29.871	29.7865	29.5828	29.7735	8.2156	29.6957	29.8532	29.6776	29.7718	3.83818	0.00390137	0.959049
FUR1	YHR128W	Uracil phosphoribosyltransferase	P18562	32.7561	32.7224	32.7623	32.804	2.32661	32.8875	33.0144	33.0796	32.8162	8.24717	-0.188232	0.0229213
FYV10	YIL097W	Protein FYV10	P40492	24.8283	25.4976	25.3123	27.0271	76.8812	25.8817	25.1006	25.3644	25.8253	56.9287	0.123313	0.817239
FYV6	YNL133C	Protein FYV6	P53913	26.3248	26.2201	26.3162	26.2015	4.42515	26.4529	26.3948	26.3335	25.9447	7.81879	-0.0158178	0.898789
FYV7	YLR068W	rRNA-processing protein FYV7	Q12247	26.3474	26.582	26.6055	26.676	9.50815	26.7407	26.6102	26.6995	26.8539	10.0506	-0.173329	0.0946433
FYV8	YGR196C	Protein FYV8	P46949	26.1955	26.4402	26.6195	26.1669	15.1171	26.3203	25.9859	25.7237	26.4214	14.1112	0.24268	0.253817
FZO1	YBR179C	Mitofusin FZO1	P38297	27.922	28.0734	27.9287	28.2066	9.54022	28.2409	27.9484	28.5896	28.2426	16.5621	-0.222721	0.181956
GAA1	YLR088W	GPI transamidase component GAA1	P39012	27.3548	27.6312	27.9113	27.73	15.717	27.4761	27.4611	27.6393	27.7589	9.35738	0.072985	0.611168
GAD1	YMR250W	Glutamate decarboxylase	Q04792	29.5285	29.6035	29.3636	29.3847	8.02831	29.7113	29.6004	29.5697	29.2864	10.2322	-0.0718714	0.527658
GAL11	YOL051W	Mediator of RNA polymerase II transcription subunit 15	P19659	28.5181	28.6679	28.7159	28.6613	5.78205	28.8812	28.905	28.7524	28.5977	1.27162	-0.143273	0.13304
GAL83	YER027C	SNF1 protein kinase subunit beta-3	Q04739	27.4269	27.5361	27.5027	27.736	9.40233	27.747	27.7856	27.7125	28.2666	8.47172	-0.327444	0.0662857
GAR1	YHR089C	H/ACA ribonucleoprotein complex subunit 1	P28007	30.8287	31.0668	30.7952	30.9889	9.00066	31.1314	31.0193	31.0145	30.9429	27.3263	-0.107127	0.20567
GAS1	YMR307W	1,3-beta-glucanosyltransferase GAS1	P22146	32.4651	32.7716	32.6647	32.6238	8.69552	32.6706	32.6587	32.6514	32.5237	7.93073	0.0051893	0.945085
GAS3	YMR215W	Probable 1,3-beta-glucanosyltransferase GAS3	Q03655	30.5005	30.671	30.7071	30.6286	6.11933	30.8434	30.944	30.8005	30.7485	7.28528	-0.207282	0.0147599
GAS5	YOL030W	1,3-beta-glucanosyltransferase GAS5	Q08193	31.5259	31.4552	31.327	31.4788	5.78343	31.7444	31.4491	31.542	31.5792	5.24327	-0.131953	0.128556
GAT1	YFL021W	Transcriptional regulatory protein GAT1	P43574	26.4534	26.2558	25.9577	26.0327	15.839	26.5955	26.2928	26.098	26.8696	3.39771	-0.289084	0.205119
GBP2	YCL011C	Single-strand telomeric DNA-binding protein GBP2	P25555	30.2847	30.2031	30.4293	30.2637	6.77551	30.3332	30.3377	30.2424	30.3048	1.85699	-0.00928229	0.866011
GCD1	YOR260W	Translation initiation factor eIF-2B subunit gamma	P09032	29.6521	29.7854	29.7104	29.5957	5.64821	29.5015	29.4939	29.5793	29.3302	1.91077	0.209673	0.0194488
GCD10	YNL062C	tRNA (adenine(58)-N(1))-methyltransferase non-catalytic subunit TRM6	P41814	28.9581	29.3518	29.4943	29.0187	17.9883	29.3161	29.2107	29.004	28.7477	13.5083	0.136108	0.478548
GCD11	YER025W	Eukaryotic translation initiation factor 2 subunit gamma	P32481	33.887	33.6932	33.6678	33.9495	9.71856	33.8733	33.743	33.9222	34.016	7.12672	-0.0892788	0.360438
GCD14	YJL125C	tRNA (adenine(58)-N(1))-methyltransferase catalytic subunit TRM61	P46959	29.1111	29.5342	29.6088	29.2508	16.0409	29.258	29.5164	29.1961	29.1945	8.325	0.0849588	0.566255
GCD2	YGR083C	Translation initiation factor eIF-2B subunit delta	P12754	30.1304	29.8282	29.8122	29.952	10.4653	29.9525	29.9712	30.041	29.8991	5.4399	-0.035264	0.671588
GCD6	YDR211W	Translation initiation factor eIF-2B subunit epsilon	P32501	31.0367	31.0435	31.0035	30.9327	3.47175	30.4762	30.6585	30.4678	30.3449	7.81336	0.517242	0.000300748
GCD7	YLR291C	Translation initiation factor eIF-2B subunit beta	P32502	29.5767	29.1146	28.8461	29.4538	22.2524	29.1612	28.8566	29.3871	29.3837	14.4918	0.0506377	0.815537
GCN1	YGL195W	Translational activator GCN1	P33892	33.6535	33.622	33.5893	33.728	4.14854	33.6026	33.4487	33.5409	33.686	2.77149	0.0786672	0.225105
GCN2	YDR283C	Serine/threonine-protein kinase GCN2	P15442	28.4977	28.3181	28.365	28.3579	5.52774	28.3912	28.4001	28.249	28.4064	2.6593	0.0230044	0.686455
GCN20	YFR009W	Protein GCN20	P43535	32.6019	32.625	32.6318	32.5594	2.25042	32.5181	32.5568	32.4795	32.4928	0.983159	0.0927336	0.00769477
GCN3	YKR026C	Translation initiation factor eIF-2B subunit alpha	P14741	29.2434	28.9956	29.4095	29.0065	14.071	28.6158	28.5165	28.4989	28.9344	12.2268	0.522371	0.0103625
GCN5	YGR252W	Histone acetyltransferase GCN5	Q03330	26.4387	26.2699	26.5003	26.3295	7.20866	26.4933	26.2783	26.2437	26.3987	11.0128	0.0311181	0.701362
GCR1	YPL075W	Glycolytic genes transcriptional activator GCR1	P07261	24.1377	24.6087	24.7738	24.6127	17.6451		24.4257			3.62311	0.107477
GCR2	YNL199C	Glycolytic genes transcriptional activator GCR2	Q01722	26.0589	26.407	26.5785	26.343	14.5539	26.2344	26.4173	26.4574	25.9925	6.29685	0.0714611	0.653664
GCS1	YDL226C	ADP-ribosylation factor GTPase-activating protein GCS1	P35197	31.2295	31.5095	31.3036	31.4563	8.99546	31.5724	31.5543	31.4863	31.4269	6.01482	-0.135283	0.114101
GCV1	YDR019C	Aminomethyltransferase, mitochondrial	P48015	31.9874	31.9033	31.9975	32.0012	3.16549	32.1579	32.3179	32.2478	32.1217	2.28777	-0.238997	0.00306985
GCV2	YMR189W	Glycine dehydrogenase (decarboxylating), mitochondrial	P49095	32.8817	32.5088	32.5091	32.5775	12.9994	32.7398	32.7117	32.6893	32.8853	3.76391	-0.137227	0.216256
GCV3	YAL044C	Glycine cleavage system H protein, mitochondrial	P39726	32.6528	32.6524	32.4857	32.7478	7.4165	32.9999	32.8275	33.0126	32.9249	10.4321	-0.306562	0.0044038
GCY1	YOR120W	Glycerol 2-dehydrogenase (NADP(+))	P14065	30.8943	30.9744	30.8376	30.9501	4.2038	30.7444	30.8701	31.0186	30.8551	6.45756	0.0420501	0.535909
GDA1	YEL042W	Guanosine-diphosphatase	P32621	30.6871	30.9338	31.0337	30.9224	9.8423	31.0484	30.9826	30.9542	30.9438	4.23939	-0.0880337	0.297019
GDB1	YPR184W	Glycogen debranching enzyme;4-alpha-glucanotransferase;Amylo-alpha-1,6-glucosidase	Q06625	28.463	28.1406	27.2009	28.1079	32.3943	28.0081	25.6439	27.0134	27.2239	16.6068	1.00578	0.123498
GDE1	YPL110C	Glycerophosphodiester phosphodiesterase GDE1	Q02979	28.4269	28.5797	28.4143	28.5148	5.44113	28.4249	28.3647	28.5014	28.1637	8.05594	0.120287	0.19342
GDH1	YOR375C	NADP-specific glutamate dehydrogenase 1	P07262	34.9985	35.0748	35.1753	35.0982	5.04725	35.0064	34.9826	35.0246	35.0934	4.91532	0.0599853	0.21713
GDH2	YDL215C	NAD-specific glutamate dehydrogenase	P33327	28.2632	28.134	28.0474	28.1662	6.1898	27.9002	27.6796	27.9082	27.797	10.6527	0.331454	0.00313471
GDH3	YAL062W	NADP-specific glutamate dehydrogenase 2	P39708							21.3931
GDI1	YER136W	Rab GDP-dissociation inhibitor	P39958	32.4229	32.3829	32.295	32.4868	5.53303	32.4553	32.3051	32.4086	32.3964	6.13741	0.00556159	0.916689
GDS1	YOR355W	Protein GDS1	P41913	25.685	25.5006	26.3693	25.1496	37.9453	25.5403	26.7577	26.237	25.7681	24.2358	-0.399637	0.324044
GEA1	YJR031C	ARF guanine-nucleotide exchange factor 1	P47102	27.6512	28.2011	28.059	27.6412	19.8155	27.4076	27.7385	27.5147	27.6609	13.1814	0.307733	0.103999
GEA2	YEL022W	ARF guanine-nucleotide exchange factor 2	P39993	31.092	31.3539	31.5549	31.3692	12.9305	31.17	31.0267	31.2842	31.2251	3.53202	0.166021	0.181886
GEF1	YJR040W	Anion/proton exchange transporter GEF1;GEF1 N-terminal;GEF1 C-terminal	P37020	24.6458	24.6639	24.7936	24.7017	4.63141	24.3061	24.4093	24.5794	24.7222	21.5501	0.19701	0.0902296
GEM1	YAL048C	Mitochondrial Rho GTPase 1	P39722	29.2736	29.7035	29.4416	29.6711	13.7455	29.6792	30.1726	29.4399	29.2457	8.59076	-0.111873	0.635757
GEP4	YHR100C	Phosphatidylglycerophosphatase GEP4, mitochondrial	P38812			23.1113				23.0565			77.7194	0.0548593
GEP7	YGL057C	Genetic interactor of prohibitin 7, mitochondrial	P53171	24.9017	24.7632	24.8542	24.9968	6.74912	25.1508	25.1587	25.191	25.0334	23.4964	-0.25449	0.00527321
GET1	YGL020C	Golgi to ER traffic protein 1	P53192	28.5944	28.6179	28.7629	28.4498	8.88372	28.3295	28.496	28.2664	28.4466	11.656	0.221634	0.0369231
GET2	YER083C	Golgi to ER traffic protein 2	P40056	29.2147	29.4651	29.4766	29.4565	8.34756	29.4114	29.4058	29.3052	29.2214	11.4648	0.0672513	0.419295
GET3	YDL100C	ATPase GET3	Q12154	32.7834	32.2225	32.2459	32.4955	18.8409	32.2991	32.4164	32.4869	32.5487	10.1271	-0.000980281	0.994698
GET4	YOR164C	Golgi to ER traffic protein 4	Q12125	29.2848	29.2403	29.1881	29.2264	2.77263	29.2381	29.0023	29.0595	29.2665	8.63107	0.0933217	0.220421
GFA1	YKL104C	Glutamine--fructose-6-phosphate aminotransferase [isomerizing]	P14742	33.0176	32.8072	32.9498	32.9072	6.06121	32.8049	32.7507	32.7122	32.7962	0.605965	0.154434	0.0198352
GFD1	YMR255W	mRNA transport factor GFD1	Q04839	26.1794	26.0327	25.8147	26.1703	11.36	26.2423	26.2049	26.2605	25.861	8.3205	-0.0929328	0.492264
GGA1	YDR358W	ADP-ribosylation factor-binding protein GGA1	Q06336	29.4991	29.525	29.505	29.4274	2.91763	29.5576	29.5386	29.5534	29.482	7.30202	-0.0437802	0.162929
GGA2	YHR108W	ADP-ribosylation factor-binding protein GGA2	P38817	30.9829	31.1487	31.0005	31.1464	6.24587	31.3793	31.2459	31.2754	31.1453	3.24453	-0.191846	0.0270668
GGC1	YDL198C	Mitochondrial GTP/GDP carrier protein 1	P38988	32.8926	32.9378	32.6482	32.971	9.69857	33.2012	33.1554	33.2039	33.2066	4.50134	-0.329383	0.00438128
GIC2	YDR309C	GTPase-interacting component 2	Q06648	23.5623	23.6588	23.3144	23.248	13.5921	23.556		23.4941	23.3539	5.413	-0.0221509	0.867701
GID7	YCL039W	Glucose-induced degradation protein 7	P25569	24.7558	23.582	25.4545	23.2506	68.667	24.6039	24.894	24.7958	24.4537	30.0309	-0.426136	0.445326
GID8	YMR135C	Glucose-induced degradation protein 8	P40208	26.2204	26.6606	26.3199	26.5929	14.5535	26.6479	26.6596	26.336	26.4845	5.24933	-0.0835691	0.545988
GIM3	YNL153C	Prefoldin subunit 4	P53900	28.1726	27.6141	28.9559	28.6889	38.1191	28.9222	28.6231	28.3424	28.545	40.95	-0.250255	0.463801
GIM4	YEL003W	Prefoldin subunit 2	P40005	26.196	26.1762	26.395	26.1208	8.55808	26.3516	26.8633	26.4237	26.6506	15.1884	-0.350315	0.0363625
GIM5	YML094W	Prefoldin subunit 5	Q04493	26.8952	26.2663	26.1506	26.4231	24.282	26.7829	26.9769	27.1923	27.6135	17.2936	-0.707622	0.026452
GIN4	YDR507C	Serine/threonine-protein kinase GIN4	Q12263	29.5902	29.7502	29.5642	29.6793	5.94292	29.6585	29.7137	29.6944	29.6375	4.10224	-0.0300655	0.536999
GIP3	YPL137C	GLC7-interacting protein 3	Q03016	28.8439	28.7976	28.8532	28.5933	8.10897	28.6413	28.7023	28.6006	28.5796	7.05192	0.141102	0.0781755
GIP4	YAL031C	GLC7-interacting protein 4	P39732	27.5251	27.5619	27.7064	27.4398	7.81723	27.4508	27.632	27.5618	27.5626	5.07233	0.00649506	0.925988
GIR2	YDR152W	Protein GIR2	Q03768	28.1527	27.8077	27.9104	28.3784	18.0221	27.4855	27.6225	27.9399	27.9748	11.3684	0.306647	0.130798
GIS1	YDR096W	Transcriptional activator/repressor GIS1	Q03833	27.3142	27.0059	27.348	27.1353	10.9163	27.354	27.2394	27.3079	27.3541	4.2253	-0.112973	0.229527
GIS2	YNL255C	Zinc finger protein GIS2	P53849						27.4723	27.5178	28.1562	26.8529	125.446
GIS4	YML006C	Protein GIS4	Q04233	26.3761	26.0465	25.9004	25.7811	18.5972	25.9152	25.817	25.9057	26.1535	16.8617	0.0781733	0.615077
GLC3	YEL011W	1,4-alpha-glucan-branching enzyme	P32775	28.8127	28.3445	28.3875	28.5361	15.2796	28.5882	28.4214	28.435	28.7511	18.5241	-0.0287222	0.833713
GLC7	YER133W	Serine/threonine-protein phosphatase PP1-2	P32598	30.908	30.5525	30.9014	30.518	14.7254	30.4937	30.5098	30.4003	30.3849	7.34417	0.272807	0.0500406
GLC8	YMR311C	Protein GLC8	P41818	29.9603	29.5452	29.4656	29.539	16.6555	29.6081	29.5535	29.5942	29.7913	7.59857	-0.00921853	0.943231
GLE1	YDL207W	Nucleoporin GLE1	Q12315	26.6772	26.6146	26.603	26.7756	5.56052	26.7684	26.7162	26.5879	26.7641	5.06859	-0.0415631	0.498675
GLE2	YER107C	Nucleoporin GLE2	P40066	29.233	28.9756	29.1067	28.9794	8.6292	29.027	28.958	29.062	29.3447	1.33577	-0.0242417	0.824757
GLG1	YKR058W	Glycogenin-1	P36143		25.9205	25.4747	26.7502	46.3131	25.6664	25.8096	25.9304		21.8972	0.246313	0.553627
GLK1	YCL040W	Glucokinase-1	P17709	33.6805	33.5215	33.3649	33.531	8.91735	33.5834	33.4072	33.5464	33.5172	12.9325	0.0109124	0.888795
GLN1	YPR035W	Glutamine synthetase	P32288	33.6745	33.6956	33.9879	33.4673	15.1471	33.2994	33.3623	33.2842	33.2987	7.31058	0.395192	0.010785
GLN3	YER040W	Nitrogen regulatory protein GLN3	P18494	28.0527	28.0896	28.0503	28.1374	2.84525	27.8456	28.018	28.0426	27.7643	13.9104	0.164856	0.0575441
GLN4	YOR168W	Glutamine--tRNA ligase	P13188	33.7035	33.7765	33.8245	33.8228	3.88673	33.7899	33.8074	33.7639	33.6632	5.28807	0.0256979	0.571483
GLO1	YML004C	Lactoylglutathione lyase	P50107	29.1895	29.0664	29.0427	29.196	5.56771	28.8397	28.869	29.2048	29.0108	15.2119	0.142588	0.174534
GLO2	YDR272W	Hydroxyacylglutathione hydrolase, cytoplasmic isozyme	Q05584	29.5055	29.8521	29.8281	29.783	10.5465	29.7474	29.7339	29.6547	29.6859	8.66871	0.0367097	0.673784
GLO3	YER122C	ADP-ribosylation factor GTPase-activating protein GLO3	P38682	31.4889	31.6184	31.4577	31.4445	5.64027	31.6384	31.5439	31.6028	31.5643	2.85527	-0.0849947	0.107524
GLO4	YOR040W	Hydroxyacylglutathione hydrolase, mitochondrial	Q12320	26.4436	27.0439	27.2204	26.4451	27.8073	26.9235	27.1449	26.5524	26.7186	14.4814	-0.0466137	0.851853
GLR1	YPL091W	Glutathione reductase	P41921-2	32.8904	32.8966	32.9566	32.8979	2.16872	32.6454	32.7786	32.711	32.6513	5.51691	0.213797	0.000843341
GLT1	YDL171C	Glutamate synthase [NADH]	Q12680	31.6495	31.3663	31.5046	31.4239	8.66347	31.9513	31.847	31.7985	31.833	5.4395	-0.371376	0.00177708
GLY1	YEL046C	Low specificity L-threonine aldolase	P37303	32.9529	32.9829	33.0957	32.8681	6.56524	32.938	32.9611	32.8932	33.0086	9.23815	0.0247076	0.656436
GMH1	YKR030W	Protein GMH1	P36125	24.6253	24.9882	25.1439	24.6778	17.3429	24.8383	24.9938	25.1031	25.3487	14.3455	-0.212159	0.243905
GNA1	YFL017C	Glucosamine 6-phosphate N-acetyltransferase	P43577	27.5431	27.9421	27.9789	27.8436	12.9605	28.2525	28.5657	28.1786	28.0263	11.9904	-0.428866	0.0292109
GND1	YHR183W	6-phosphogluconate dehydrogenase, decarboxylating 1	P38720	35.8518	36.0976	36.1817	36.0133	9.58489	36.0627	36.0691	35.9838	35.8259	6.50443	0.0507664	0.594408
GND2	YGR256W	6-phosphogluconate dehydrogenase, decarboxylating 2	P53319	22.2512	24.0599	24.2065	23.6721	46.2589		23.4243	22.5772	22.9057	24.0227	0.57835	0.354677
GNP1	YDR508C	High-affinity glutamine permease	P48813	29.9991	29.9101	30.0351	30.0145	3.75943	29.9474	29.8759	29.9141	29.7909	10.0139	0.107646	0.0482881
GNT1	YOR320C	Glucose N-acetyltransferase 1	Q12096	27.2796	27.0227	27.0423	26.9825	9.68193	26.9132	26.7826	26.6861	26.5706	3.1119	0.343687	0.0132379
GON7	YJL184W	EKC/KEOPS complex subunit GON7	P46984	26.1167	25.5872	26.2584	26.9216	39.0256	26.5309	26.3733	26.3336	26.146	43.5564	-0.124982	0.677152
GOR1	YNL274C	Glyoxylate reductase 1	P53839	30.7282	30.4802	30.5985	30.6701	7.30335	30.4281	30.5567	30.6112	30.5308	7.0098	0.0875131	0.231602
GOS1	YHL031C	Golgi SNAP receptor complex member 1	P38736	29.4027	29.2152	29.2608	29.1628	7.28012	29.2383	29.358	29.2313	29.4292	7.11037	-0.0538115	0.474096
GPA2	YER020W	Guanine nucleotide-binding protein alpha-2 subunit	P10823	28.1318	28.0879	27.7788	28.0387	10.4639	28.2123	28.2219	28.1579	28.1364	6.24059	-0.172847	0.0791111
GPB1	YOR371C	Guanine nucleotide-binding protein subunit beta 1	Q08886	27.2252	27.1269	27.1567	27.1795	2.88219	27.2199	27.2443	27.0685	27.2168	8.47499	-0.0152805	0.746516
GPB2	YAL056W	Guanine nucleotide-binding protein subunit beta 2	P39717	24.6381	25.0588	25.4663	25.0718	23.2487	24.9066	25.4394	24.9466	24.3909	22.9685	0.137878	0.631431
GPD1	YDL022W	Glycerol-3-phosphate dehydrogenase [NAD(+)] 1	Q00055	33.1712	33.1892	33.2044	33.0724	4.0504	32.9546	32.7843	33.0844	32.9699	4.19118	0.211009	0.0218489
GPD2	YOL059W	Glycerol-3-phosphate dehydrogenase [NAD(+)] 2, mitochondrial	P41911	32.0613	32.0952	32.0737	32.1949	4.28383	32.0833	31.8874	32.0337	32.0057	2.43525	0.103739	0.0905818
GPG1	YGL121C	Heterotrimeric G protein gamma subunit GPG1	P53130		21.3761	21.061		15.3851			20.2882	22.2061	34.6365	-0.0285892	0.979203
GPH1	YPR160W	Glycogen phosphorylase	P06738	30.3297	29.8997	30.0274	29.8523	15.6029	29.9691	29.8613	29.8596	29.8378	19.9457	0.145308	0.239767
GPI11	YDR302W	Glycosylphosphatidylinositol anchor biosynthesis protein 11	Q06636	26.0765	25.9801	25.7804	26.026	8.68676	26.3827	26.1106	26.4472	26.3133	17.9013	-0.347702	0.0118726
GPI12	YMR281W	N-acetylglucosaminyl-phosphatidylinositol de-N-acetylase	P23797	25.0951	26.108	26.201	25.6296	32.1822	25.8241	26.0021	25.5337	25.371	17.7616	0.0757052	0.80343
GPI13	YLL031C	GPI ethanolamine phosphate transferase 3	Q07830	26.6381	26.4961	26.721	26.3897	10.1531	26.7471	26.5616	26.3177	26.598	13.2269	0.00512428	0.966067
GPI16	YHR188C	GPI transamidase component GPI16	P38875	29.2588	28.9745	29.1033	29.1346	8.08439	29.076	28.9422	29.0248	29.1618	8.06896	0.0666068	0.404967
GPI17	YDR434W	GPI transamidase component GPI17	Q04080	27.8156	27.7617	27.6091	27.8675	7.55844	27.8749	27.3405	27.7645	27.7992	25.4016	0.0687052	0.622948
GPI8	YDR331W	GPI-anchor transamidase	P49018	26.848	26.8588	26.8103	26.7158	4.43268	26.7357	26.3673	27.3086	26.2742	8.90092	0.136769	0.584613
GPM1	YKL152C	Phosphoglycerate mutase 1	P00950	35.8607	35.7773	35.8108	35.9082	3.98336	36.2873	36.3014	36.335	36.096	6.34989	-0.415666	0.000492034
GPM2	YDL021W	Phosphoglycerate mutase 2	Q12008	28.0977	27.6429	27.8551	27.7527	13.8386	27.8463	27.9303	27.7835	27.7677	8.7726	0.00515149	0.962049
GPM3	YOL056W	Phosphoglycerate mutase 3	Q12326	27.7666	27.4329	26.8945	28.4208	44.7764	28.926	27.8251	28.1927	27.6836	10.3398	-0.528128	0.258697
GPT2	YKR067W	Glycerol-3-phosphate O-acyltransferase 2	P36148	29.3943	29.4721	29.2786	29.4977	6.70099	29.5428	29.446	29.4815	29.4451	4.55586	-0.0682025	0.255627
GPX2	YBR244W	Glutathione peroxidase 2	P38143	30.3215	30.601	30.4804	30.703	11.2271	30.8822	30.8807	30.8189	30.726	13.6823	-0.30046	0.0155855
GRC3	YLL035W	Polynucleotide 5-hydroxyl-kinase GRC3	Q07845	24.84	24.1259	24.4635	24.4326	20.6041	24.328	24.0594	24.0464	24.3913	19.6415	0.259236	0.181368
GRE2	YOL151W	NADPH-dependent methylglyoxal reductase GRE2	Q12068	30.5164	30.6045	30.616	30.7519	6.81979	31.0508	31.0401	31.1308	30.9088	7.41454	-0.410404	0.000859025
GRE3	YHR104W	NADPH-dependent aldose reductase GRE3	P38715	32.0717	32.1038	32.1726	32.0495	3.75531	32.2055	32.177	32.09	32.0711	4.5082	-0.0364885	0.421538
GRH1	YDR517W	GRASP65 homolog protein 1	Q04410	29.2404	29.2538	29.3674	29.335	4.29146	28.9635	28.8706	29.0917	29.3213	5.07134	0.237388	0.059659
GRS1	YBR121C	Glycine--tRNA ligase 1, mitochondrial	P38088-2	35.1114	35.0166	35.034	35.0977	3.23033	35.0324	35.1162	35.0495	35.0704	2.67583	-0.00223752	0.94205
GRS2	YPR081C	Glycine--tRNA ligase 2	Q06817	26.8297	26.6274	26.854	26.5313	10.7593	27.1613	27.0433	26.7477	26.7137	4.5243	-0.205884	0.17869
GRX1	YCL035C	Glutaredoxin-1	P25373	27.6964	27.0028	27.471	27.5201	19.0811	27.9799	27.943	27.884	27.7976	17.1849	-0.478538	0.0205432
GRX2	YDR513W	Glutaredoxin-2, mitochondrial	P17695	30.7982	30.942	30.7173	30.8934	6.89024	31.3074	31.3606	31.2935	31.2931	7.02386	-0.475933	0.000101337
GRX3	GRX3;GRX4	Monothiol glutaredoxin-3	Q03835	29.6453	29.4119	29.1653	29.6226	14.8963	29.6283	29.4899	29.7466	29.6717	17.5073	-0.172819	0.213226
GRX5	YPL059W	Monothiol glutaredoxin-5, mitochondrial	Q02784	28.1113	27.1666	27.3795	28.2353	35.3545	28.4526	28.0692	28.0928	28.1156	25.3102	-0.459392	0.151648
GRX6	YDL010W	Monothiol glutaredoxin-6	Q12438	25.7182	25.7598	25.7039	26.0096	10.3647	26.0084	25.525	25.5624	25.9479	30.1192	0.0369636	0.807463
GRX7	YBR014C	Monothiol glutaredoxin-7	P38068	29.8771	29.4215	29.467	29.6259	14.776	29.4971	29.527	29.5991	29.7982	4.57982	-0.00748717	0.953514
GRX8	YLR364W	Glutaredoxin-8	Q05926	21.6911		20.9668		34.7745	20.5565	21.3421	21.3567	21.7806	34.3018	0.069973	0.88202
GSC2	YGR032W	1,3-beta-glucan synthase component GSC2	P40989		20.0556	23.9094	20.6939	134.258	20.7356	26.8921	20.1112	20.7869	113.652	-0.578507	0.797159
GSF2	YML048W	Glucose-signaling factor 2	Q04697	31.0344	31.0189	31.015	30.9209	3.51927	30.8405	30.8541	30.9581	31.0608	1.15543	0.0689479	0.275592
GSH1	YJL101C	Glutamate--cysteine ligase	P32477	28.8297	29.1291	29.1185	28.9992	9.39143	29.0617	28.9942	29.0164	28.8491	5.24033	0.0387954	0.658428
GSH2	YOL049W	Glutathione synthetase	Q08220	30.3377	30.3869	30.3851	30.5036	4.97624	30.4582	30.4957	30.5484	30.4002	4.1831	-0.0722882	0.176017
GSP1	YLR293C	GTP-binding nuclear protein GSP1/CNR1	P32835	34.4439	34.1828	34.2396	34.2912	7.93911	34.2395	34.2757	34.1741	34.4457	9.95849	0.00565475	0.946368
GSP2	YOR185C	GTP-binding nuclear protein GSP2/CNR2	P32836	26.8934	26.8513	26.7661	26.8604	3.71302	26.5729	26.9365	26.4775	27.1179	8.50318	0.0665958	0.679106
GSY1	YFR015C	Glycogen [starch] synthase isoform 1	P23337	28.674	28.532	28.539	28.6826	5.71993	28.7553	28.4616	28.557	28.4962	14.3876	0.0393471	0.629936
GSY2	YLR258W	Glycogen [starch] synthase isoform 2	P27472	31.7605	31.3218	31.5084	31.5125	12.6632	31.6387	31.4834	31.504	31.6089	11.5755	-0.0329718	0.747459
GTB1	YDR221W	Glucosidase 2 subunit beta	Q04924	28.1681	28.0787	28.1423	28.292	6.28769	27.7439	27.9728	28.076	27.6976	2.76405	0.297681	0.0257741
GTR1	YML121W	GTP-binding protein GTR1	Q00582	27.0684	26.2768	26.7157	25.9766	33.138	27.043	26.246	26.9223	27.1856	22.2353	-0.339848	0.32619
GTR2	YGR163W	GTP-binding protein GTR2	P53290	26.3316	25.9095	26.1054	26.333	13.7254	26.4535	26.0754	26.1373	26.3304	22.8612	-0.079259	0.576045
GTS1	YGL181W	Protein GTS1	P40956	29.1459	29.1408	29.1021	29.3215	6.98769	29.4038	29.063	29.2539	29.2621	19.2118	-0.0681033	0.455469
GTT1	YIR038C	Glutathione S-transferase 1	P40582	28.7326	28.7797	29.0675	28.4385	17.8007	29.0635	29.0085	28.9441	28.915	6.59771	-0.22819	0.136993
GTT3	YEL017W	Glutathione transferase 3	P39996	24.8702	24.6541	24.4897	24.6471	10.993	24.8676	24.8716	25.1289	24.8065	14.3542	-0.253407	0.054018
GUA1	YMR217W	GMP synthase [glutamine-hydrolyzing]	P38625	34.1907	33.9028	33.8796	34.0772	10.3573	34.0608	33.9649	34.0515	34.1098	3.40383	-0.0341935	0.683528
GUK1	YDR454C	Guanylate kinase	P15454	32.9812	32.8997	32.9662	33.0949	5.68519	33.0718	33.0794	33.1035	33.1716	7.11367	-0.121101	0.040308
GUP1	YGL084C	Glycerol uptake protein 1	P53154	27.2968	27.803	27.757	27.5907	15.098	27.9991	27.9149	27.7779	27.8002	21.3435	-0.261157	0.0828344
GUS1	YGL245W	Glutamate--tRNA ligase, cytoplasmic	P46655	35.4491	35.2388	35.2672	35.1982	7.91777	35.2438	35.2372	35.2035	35.3011	3.15348	0.0419203	0.50414
GUT1	YHL032C	Glycerol kinase	P32190	25.2189	25.7344	26.1586	25.9466	25.9222	26.5137	26.5508	25.6134	25.4152	6.75016	-0.258624	0.497967
GUT2	YIL155C	Glycerol-3-phosphate dehydrogenase, mitochondrial	P32191	29.1634	28.9906	29.0626	28.8719	8.46349	28.8255	28.6953	28.8136	28.7898	12.2051	0.241089	0.0122016
GVP36	YIL041W	Protein GVP36	P40531	32.8002	32.5367	32.7734	32.8431	9.12869	33.06	33.0013	32.9276	32.9507	3.53662	-0.246541	0.0164412
GYL1	YMR192W	Probable GTPase-activating protein GYL1	Q04322	28.7934	28.6967	28.8272	28.4539	11.1914	28.5417	28.518	28.5547	28.5958	5.05632	0.140274	0.153427
GYP1	YOR070C	GTPase-activating protein GYP1	Q08484	27.0798	27.1406	27.1857	27.2254	4.31224	27.2099	27.2268	27.2264	27.2337	7.48756	-0.0663495	0.0809396
GYP5	YPL249C	GTPase-activating protein GYP5	Q12344	28.9492	28.9984	28.9873	28.8844	3.52996	28.9236	28.7418	28.9229	28.5848	2.95173	0.161548	0.107895
GYP6	YJL044C	GTPase-activating protein GYP6	P32806	26.5813	26.2328	26.4713	25.9223	19.3718	26.4763	26.5693	26.178	26.1937	8.33727	-0.0524085	0.776469
GYP7	YDL234C	GTPase-activating protein GYP7	P48365	28.8896	28.7582	28.599	28.8251	8.4629	28.8823	28.8236	28.8799	29.0405	2.60618	-0.1386	0.125556
GYP8	YFL027C	GTPase-activating protein GYP8	P43570	25.0829	25.0777	25.2691	25.0802	6.75587	25.3337	25.162	25.1341	25.1025	7.88385	-0.0555791	0.457389
GZF3	YJL110C	Protein GZF3	P42944	25.6338	25.9065	26.0738	25.9055	12.2862	26.0646	26.1215	25.8389	26.2118	11.7771	-0.179308	0.188424
HAA1	YPR008W	Transcriptional activator HAA1	Q12753	26.5955	26.7517	26.1933	26.5045	15.6873	26.3159	26.0932	26.5635	26.5999	19.3137	0.118142	0.505277
HAL5	YJL165C	Serine/threonine-protein kinase HAL5	P38970	28.6941	28.7537	28.7093	28.6552	2.82671	28.7594	28.8662	28.8596	28.794	7.02261	-0.116718	0.0121727
HAM1	YJR069C	Inosine triphosphate pyrophosphatase	P47119	30.6659	30.6984	30.6182	30.875	7.98482	30.9331	30.7604	30.7488	30.7211	4.44045	-0.0764859	0.340273
HAP1	YLR256W	Heme-responsive zinc finger transcription factor HAP1	P0CE41	26.6471	27.0297	26.6129	26.7392	13.7719	26.7683	26.5101	26.578	26.3424	13.2157	0.207512	0.159683
HAP2	YGL237C	Transcriptional activator HAP2	P06774	24.925	24.8259	24.9175	24.9348	3.43903	24.9361	25.0385	24.7733	24.9294	12.5879	-0.0185275	0.76879
HAP5	YOR358W	Transcriptional activator HAP5	Q02516	22.9414	22.7265	22.7349	23.6303	32.913	23.2346	22.8397	23.5317	22.8964	16.3091	-0.117291	0.67604
HAS1	YMR290C	ATP-dependent RNA helicase HAS1	Q03532	31.6053	31.5945	31.5816	31.4547	4.75568	31.5998	31.644	31.5752	31.6014	4.86156	-0.04607	0.26995
HAT1	YPL001W	Histone acetyltransferase type B catalytic subunit	Q12341	27.969	27.6995	27.7718	27.7345	8.63804	27.7246	27.579	27.8276	27.6997	14.8301	0.0859696	0.318219
HAT2	YEL056W	Histone acetyltransferase type B subunit 2	P39984	28.1191	27.5782	27.7321	27.4481	21.1941	27.5396	27.5413	27.6529	27.5468	8.04679	0.149199	0.352139
HBN1	YCL026C-B	Putative nitroreductase HBN1	Q96VH4	29.0947	29.0281	28.9815	28.9566	4.24223	29.4679	29.4706	29.4372	29.4155	10.0334	-0.432575	1.23526e-05
HBS1	YKR084C	Elongation factor 1 alpha-like protein	P32769	29.9662	29.9499	29.9197	29.952	1.35136	29.9621	29.6343	29.825	29.8881	9.32177	0.119577	0.142504
HBT1	YDL223C	Protein HBT1	Q07653	24.981	25.7504	25.7362	24.6612	35.9294	24.4176	24.7933	25.2602	24.1648	48.8399	0.623261	0.137042
HCA4	YJL033W	ATP-dependent RNA helicase HCA4	P20448	29.9088	29.9673	29.8528	30.0828	6.90715	30.0495	30.0217	30.137	29.8827	4.73502	-0.0697375	0.370976
HCH1	YNL281W	Hsp90 co-chaperone HCH1	P53834	30.7729	31.1486	31.2402	30.9568	14.1317	31.0573	31.1672	30.9948	30.8713	11.1591	0.00697522	0.955877
HCR1	YLR192C	Eukaryotic translation initiation factor 3 subunit J	Q05775	32.5532	32.7575	32.718	32.747	6.40562	32.7156	32.8107	32.8235	32.6971	7.3096	-0.0678128	0.283403
HCS1	YKL017C	DNA polymerase alpha-associated DNA helicase A	P34243	27.2365	27.0513	26.8492	26.9882	11.2609	27.2437	26.9116	27.1719	27.2504	13.6989	-0.113091	0.35609
HDA1	YNL021W	Histone deacetylase HDA1	P53973	27.4545	27.0032	27.3989	26.9915	17.1635	27.0546	26.9513	27.0314	27.0549	4.27805	0.189028	0.186844
HDA2	YDR295C	HDA1 complex subunit 2	Q06629	26.952	26.7162	26.2315	27.0793	23.8955	26.657	26.6638	26.8676	26.959	7.74451	-0.042134	0.841303
HDA3	YPR179C	HDA1 complex subunit 3	Q06623	27.9738	27.849	27.8471	27.8156	4.95134	27.6458	27.8348	27.6598	27.9313	1.01409	0.103471	0.23138
HEF3	YNL014W	Elongation factor 3B	P53978	30.6535	29.7215	30.0532	29.9599	29.6293	30.336	30.1105	30.4173	30.6963	25.8529	-0.292971	0.253892
HEH2	YDR458C	Inner nuclear membrane protein HEH2	Q03281	28.46	27.9258	28.2716	28.2016	14.9981	27.9127	28.1813	28.2318	28.5712	5.09101	-0.00951392	0.958342
HEK2	YBL032W	Heterogeneous nuclear rnp K-like protein 2	P38199	30.4656	30.6514	30.9048	30.5761	13.3416	30.6667	30.8737	30.7657	30.6699	7.78541	-0.0945453	0.40397
HEM1	YDR232W	5-aminolevulinate synthase, mitochondrial	P09950	30.9766	30.8092	30.9424	31.0383	6.59421	30.586	30.4099	30.4862	30.4329	5.32122	0.462872	0.00030485
HEM12	YDR047W	Uroporphyrinogen decarboxylase	P32347	29.1264	28.8716	28.8947	29.0548	8.60538	28.8602	28.8771	28.8525	28.9108	3.58672	0.111747	0.127325
HEM13	YDR044W	Oxygen-dependent coproporphyrinogen-III oxidase	P11353	29.0121	29.1143	28.8434	29.1942	10.2822	29.3471	29.1738	29.151	29.0618	3.79372	-0.14242	0.189933
HEM14	YER014W	Protoporphyrinogen oxidase	P40012	28.584	28.6782	28.817	28.6428	6.98532	28.6677	28.6519	28.7046	28.6961	5.55654	0.000386063	0.994202
HEM15	YOR176W	Ferrochelatase, mitochondrial	P16622	31.0832	30.6406	30.765	30.7517	13.816	30.8251	30.7223	30.7429	30.9331	10.9567	0.00426985	0.969336
HEM2	YGL040C	Delta-aminolevulinic acid dehydratase	P05373	30.8585	30.8391	30.9069	31.0351	6.24602	31.0191	30.9685	31.1027	30.829	5.72006	-0.0699032	0.371466
HEM3	YDL205C	Porphobilinogen deaminase	P28789	30.9185	31.0702	31.2587	31.1539	9.84238	31.0977	31.1993	31.1152	30.958	4.17514	0.00776847	0.932163
HEM4	YOR278W	Uroporphyrinogen-III synthase	P06174	27.2956	27.3004	27.2507	27.3726	3.51904	27.6347	27.4375	27.3371	27.2724	15.5084	-0.115569	0.213292
HER1	YOR227W	HMG2-induced ER-remodeling protein 1	Q12276	26.1776	26.0003	26.2094	26.4304	12.3655	26.2486	25.8444	26.2355	26.4154	19.431	0.0184758	0.905854
HER2	YMR293C	Glutamyl-tRNA(Gln) amidotransferase subunit A, mitochondrial	Q03557								21.9883
HFA1	YMR207C	Acetyl-CoA carboxylase, mitochondrial;Biotin carboxylase	P32874	26.8433	27.0009	26.7209	27.4002	21.6302	27.4116	26.7339	26.9378	26.7535	17.3847	0.032108	0.88676
HFD1	YMR110C	Fatty aldehyde dehydrogenase HFD1	Q04458	29.1369	28.854	29.0993	28.9502	9.0351	28.9378	28.7716	28.6997	28.7059	5.49546	0.231349	0.0361601
HFI1	YPL254W	Transcriptional coactivator HFI1/ADA1	Q12060	26.0112	25.78	25.7829	26.182	13.7504	25.7491	26.2991	25.4827	26.0779	8.24017	0.0368589	0.862886
HGH1	YGR187C	Protein HGH1	P48362	31.0761	31.2097	31.2545	31.1612	5.24606	30.8175	30.6905	30.7495	30.7965	5.17842	0.411879	0.00012928
HHF1	YBR009C	Histone H4	P02309	30.5608	30.7923	30.9721	30.328	19.1096	31.2177	31.4612	31.1337	30.8234	24.0832	-0.495692	0.0417762
HHO1	YPL127C	Histone H1	P53551	30.2969	30.1338	30.3088	30.0246	9.34439	30.1123	30.3423	30.1079	30.1072	7.37506	0.0235739	0.801784
HHT1	YBR010W	Histone H3	P61830	32.4912	32.6775	32.8339	32.7994	10.4181	32.5815	32.4285	32.3895	32.1822	14.4207	0.305087	0.0355439
HIF1	YLL022C	HAT1-interacting factor 1	Q12373	27.6009	27.885	27.7945	27.8843	8.95	27.4466	27.5154	27.4987	27.1059	4.55088	0.399525	0.0143899
HIP1	YGR191W	Histidine permease	P06775	24.4523	25.0124	25.1386	25.2821	22.7954	24.6306	24.9201	24.6203	24.6585	39.0665	0.263947	0.224825
HIR1	YBL008W	Protein HIR1	P32479	26.0008	26.2164	26.3632	26.2167	10.1627	26.1766	26.2702	26.2912	26.3664	13.4557	-0.0768085	0.397144
HIR2	YOR038C	Protein HIR2	P32480	26.9247	26.7204	26.8544	26.8332	5.81081	26.9516	27.116	26.9893	27.2537	7.48202	-0.244522	0.0228321
HIR3	YJR140C	Histone transcription regulator 3	P47171	27.1466	26.3912	26.3706	26.6234	27.1166	26.5684	26.2604	27.2484	27.3342	36.7395	-0.219902	0.514701
HIS1	YER055C	ATP phosphoribosyltransferase	P00498	32.8733	32.6156	32.6325	32.6246	9.00898	32.5766	32.6127	32.4683	32.7317	7.54211	0.0891762	0.32225
HIS2	YFR025C	Histidinol-phosphatase	P38635	26.4343	25.9949	26.3504	26.1915	13.0936	26.5774	26.5838	26.5415	26.2912	10.0328	-0.255674	0.0757317
HIS4	YCL030C	Histidine biosynthesis trifunctional protein;Phosphoribosyl-AMP cyclohydrolase;Phosphoribosyl-ATP pyrophosphohydrolase;Histidinol dehydrogenase	P00815	34.6521	34.7919	34.7236	34.7818	4.41132	34.8556	34.8927	34.7913	34.7997	5.72794	-0.0974733	0.0512461
HIS5	YIL116W	Histidinol-phosphate aminotransferase	P07172	31.6164	31.7344	31.7661	31.7087	4.40298	31.6104	31.5138	31.5109	31.5611	6.93161	0.157319	0.00755724
HIS6	YIL020C	1-(5-phosphoribosyl)-5-[(5-phosphoribosylamino)methylideneamino] imidazole-4-carboxamide isomerase	P40545	29.3167	29.3888	29.3796	29.3993	2.54705	29.4576	29.4859	29.3233	29.3765	9.57245	-0.0397337	0.376825
HIS7	YBR248C	Imidazole glycerol phosphate synthase hisHF;Glutamine amidotransferase;Cyclase	P33734	33.1795	33.047	32.9819	33.0455	5.8539	33.0531	33.0953	33.0705	33.0993	3.52582	-0.0161097	0.720386
HLJ1	YMR161W	Protein HLJ1	P48353	28.5573	28.5219	28.6572	28.4316	6.47844	28.3385	28.5876	28.4325	28.2551	7.31151	0.138583	0.154895
HMF1	YER057C	Protein HMF1	P40037	29.3744	29.1283	29.3138	29.7469	18.7579	29.4194	29.4925	29.4388	29.2757	18.6484	-0.0157444	0.912711
HMG1	YML075C	3-hydroxy-3-methylglutaryl-coenzyme A reductase 1	P12683	29.8732	30.1234	30.1617	30.1148	8.73512	29.8657	29.9442	29.8668	29.9096	5.16261	0.171708	0.0460632
HMG2	YLR450W	3-hydroxy-3-methylglutaryl-coenzyme A reductase 2	P12684	28.612	28.6625	28.7066	28.7486	4.05447	28.6354	28.5256	28.599	28.7122	6.89769	0.0643608	0.233793
HMO1	YDR174W	High mobility group protein 1	Q03973	30.4259	30.3448	30.3993	30.4214	2.55727	30.4114	30.5016	30.3791	30.2562	5.26794	0.0107655	0.848728
HMT1	YBR034C	HNRNP arginine N-methyltransferase	P38074	30.1471	30.0521	30.0865	30.0407	3.34453	29.8724	29.9618	30.0234	29.8325	5.14477	0.159074	0.0180164
HMX1	YLR205C	Heme-binding protein HMX1	P32339	26.6618	26.5631	26.3173	26.644	10.5131	26.0404	25.7295	26.4382	26.6728	18.0676	0.326348	0.195079
HNT1	YDL125C	Hit family protein 1	Q04344	29.5963	29.583	29.5927	29.4529	4.67801	30.3584	30.4332	30.4007	30.2443	12.2879	-0.802954	5.69303e-06
HNT2	YDR305C	Bis(5-adenosyl)-triphosphatase	P49775	24.6198	25.2187	25.6329	25.4798	27.8912	25.2196	25.3239	25.2509	25.0199	8.79619	0.0342627	0.887581
HOC1	YJR075W	Putative glycosyltransferase HOC1	P47124	29.1007	29.1048	29.2238	29.096	4.36764	29.054	28.7761	29.0364	29.0833	6.03077	0.143888	0.11287
HOG1	YLR113W	Mitogen-activated protein kinase HOG1	P32485	30.2818	30.0156	30.2305	30.2871	8.52037	30.1269	30.1188	30.2967	30.0693	11.4065	0.0508395	0.553216
HOL1	YNR055C	Protein HOL1	P53389	24.7367	25.3069	25.4597	24.6441	27.8485	24.9083	25.009	24.983	24.8867	19.3276	0.0900493	0.676473
HOM2	YDR158W	Aspartate-semialdehyde dehydrogenase	P13663	34.9525	35.2256	35.2365	35.2127	9.0195	35.2046	35.287	35.3188	34.9781	5.9375	-0.0402958	0.708674
HOM3	YER052C	Aspartokinase	P10869	33.1884	33.2344	33.225	33.1589	2.40088	33.0101	32.9835	33.0056	32.8443	4.86863	0.240779	0.00137686
HOM6	YJR139C	Homoserine dehydrogenase	P31116	34.5864	34.5418	34.6327	34.6482	3.31738	34.588	34.4917	34.5227	34.5019	5.76248	0.0761865	0.0566247
HOR2	HOR2	Glycerol-1-phosphate phosphohydrolase 2	P40106	31.6603	31.6354	31.6732	31.6635	1.11163	31.7333	31.6047	31.6677	31.7282	15.8467	-0.0253746	0.447799
HOS2	YGL194C	Probable histone deacetylase HOS2	P53096	26.811	29.0451	27.0072	26.8588	92.5157	27.0235	26.9554	27.1609	27.4604	4.43009	0.280492	0.629059
HOS3	YPL116W	Histone deacetylase HOS3	Q02959	28.6017	28.6051	28.7408	28.6643	4.57485	28.6899	28.656	28.7161	28.7423	8.38918	-0.0481243	0.246373
HOS4	YIL112W	Protein HOS4	P40480	26.7035	26.808	26.6838	26.6369	5.0765	26.9874	26.9313	27.3186	26.9106	10.0015	-0.328971	0.0179436
HOT1	YMR172W	High-osmolarity-induced transcription protein 1	Q03213	26.3186	27.1251	27.0851	26.3559	30.0683	26.5849	26.8029	26.7441	26.4317	27.9382	0.0802711	0.746532
HPA3	YEL066W	D-amino-acid N-acetyltransferase HPA3	P39979	28.1726	28.0513	28.0441	27.9045	7.55968	28.2754	28.4098	28.0309	27.8907	13.1951	-0.108615	0.433144
HPC2	YBR215W	Histone promoter control protein 2	Q01448	26.9043	26.3726	26.4927	26.2063	21.721	26.4025	26.3492	26.5182	26.5799	13.7996	0.0315099	0.848409
HPF1	YOL155C	Haze protective factor 1	Q05164	25.443	25.5061	25.1001	25.7586	18.3553	25.76	25.1331	25.2062	25.5669	25.4608	0.0354119	0.866112
HPM1	YIL110W	Histidine protein methyltransferase 1	P40481	27.6986	27.2729	27.4385	27.5115	12.2815	27.2916	27.4328	27.1856	27.3777	12.7496	0.158455	0.17627
HPR1	YDR138W	THO complex subunit HPR1	P17629	27.9786	27.7491	27.8456	27.9158	6.77106	27.9903	27.9022	27.8467	27.8273	19.7511	-0.0193393	0.763021
HPT1	YDR399W	Hypoxanthine-guanine phosphoribosyltransferase	Q04178	30.2846	29.9035	30.0539	30.2466	12.0571	30.361	30.2546	30.4611	30.4858	8.11867	-0.268459	0.0405459
HRB1	YNL004W	Protein HRB1	P38922	28.6526	28.3878	28.3827	28.4653	9.02691	28.3294	28.4402	28.2437	28.4737	2.75313	0.100335	0.267826
HRD1	YOL013C	ERAD-associated E3 ubiquitin-protein ligase HRD1	Q08109	26.252	25.6251	25.6865	25.8446	20.8281	26.1436	25.6804	26.1914	26.7473	20.2468	-0.338635	0.240547
HRD3	YLR207W	ERAD-associated E3 ubiquitin-protein ligase component HRD3	Q05787	27.861	27.9623	27.9189	27.9203	2.87366	28.0691	27.5795	27.891	28.0218	6.85149	0.0252959	0.829112
HRI1	YLR301W	Protein HRI1	Q05905	32.0122	31.8725	31.9297	31.9557	4.0195	31.9743	31.9587	31.9877	31.8586	3.55706	-0.0023106	0.957164
HRK1	YOR267C	Serine/threonine-protein kinase HRK1	Q08732	29.6993	29.8944	29.9944	29.7149	9.999	29.7129	29.8014	29.8242	29.5919	8.60452	0.0931204	0.335057
HRP1	YOL123W	Nuclear polyadenylated RNA-binding protein 4	Q99383	31.3696	31.4227	31.4013	31.2976	3.74861	31.4503	31.5429	31.4561	31.5656	4.25568	-0.130907	0.0174382
HRQ1	YDR291W	Putative ATP-dependent helicase HRQ1	Q05549	24.0507	24.0756	24.076	23.8044	8.73928	23.9869	24.1048	24.0066	24.0927	19.2205	-0.0460803	0.548217
HRR25	YPL204W	Casein kinase I homolog HRR25	P29295	29.5587	29.2044	29.3047	29.2798	11.0924	29.2135	29.0988	29.2451	29.4171	8.29059	0.0932951	0.392365
HRT1	YOL133W	RING-box protein HRT1	Q08273	23.3736	22.8728	23.0328	23.3373	16.4385	24.0147	23.4164	24.1242	24.2733	52.3032	-0.803	0.0114541
HSC82	YMR186W	ATP-dependent molecular chaperone HSC82	P15108	36.8918	36.79	36.8047	36.8218	3.16107	36.7844	36.83	36.7196	36.7275	1.87395	0.0617347	0.122495
HSE1	YHL002W	Class E vacuolar protein-sorting machinery protein HSE1	P38753	28.49	28.0318	27.5598	28.5733	30.0004	28.5764	28.5416	28.4365	28.7074	16.3509	-0.401767	0.145797
HSF1	YGL073W	Heat shock factor protein	P10961	27.6549	27.7279	27.5453	27.8013	7.50438	27.8717	27.7872	27.681	27.8052	7.02565	-0.103901	0.174093
HSH155	YMR288W	U2 snRNP component HSH155	P49955	27.8985	27.5243	27.5502	27.6008	12.6196	27.7767	27.4227	27.6673	27.792	10.12	-0.021206	0.867158
HSL1	YKL101W	Probable serine/threonine-protein kinase HSL1	P34244	28.461	27.8931	28.2592	28.4619	17.3729	28.3198	28.0261	28.318	28.5075	10.2934	-0.0240762	0.889989
HSL7	YBR133C	Protein arginine N-methyltransferase HSL7	P38274	28.0432	28.1932	28.1671	28.0384	5.62884	28.2135	28.1592	28.3401	28.2406	5.83987	-0.12792	0.0607914
HSM3	YBR272C	DNA mismatch repair protein HSM3	P38348	26.3171	26.4034	26.0991	26.3932	9.4118	26.1116	26.6998	26.5989	26.3047	11.3517	-0.125554	0.441249
HSP10	YOR020C	10 kDa heat shock protein, mitochondrial	P38910	30.6655	30.7219	30.5842	30.9419	10.9444	31.2051	31.436	31.2918	30.9505	29.7297	-0.492447	0.00833498
HSP104	YLL026W	Heat shock protein 104	P31539	33.7843	33.8486	33.8369	33.7879	2.29321	33.9628	33.9016	33.8196	33.8182	2.49825	-0.061167	0.165244
HSP12	YFL014W	12 kDa heat shock protein	P22943	32.4976	32.7363	32.5448	32.3755	10.5612	31.4408	31.8009	32.4189	31.3153	54.3416	0.7946	0.0218294
HSP150	YJL159W	Cell wall mannoprotein HSP150	P32478	33.2412	34.0543	33.9498	33.4277	26.7346	33.6244	33.8872	33.6011	33.405	3.03079	0.0387964	0.866435
HSP26	YBR072W	Heat shock protein 26	P15992	27.906	28.2839	28.0843	28.664	23.4215	28.1173	27.6701	27.9213	27.6412	17.5198	0.397059	0.0914175
HSP30	YCR021C	30 kDa heat shock protein	P25619
HSP31	YDR533C	Probable chaperone protein HSP31	Q04432	30.8753	30.9484	30.8916	30.9009	2.19209	31.2248	31.0428	30.9812	30.9473	7.61272	-0.145008	0.0634016
HSP32;HSP33;SNO4	YPL280W	Probable chaperone protein HSP32;Probable chaperone protein HSP33;Protein SNO4	Q08992	24.1893		23.6491	25.4925	68.6207	26.3504		25.9031	26.5326	143.022	-1.81838	0.034685
HSP42	YDR171W	Heat shock protein 42	Q12329	30.2667	30.3227	30.1611	30.0827	7.39823	30.2227	30.3414	30.1471	30.2514	13.592	-0.0323294	0.646435
HSP60	YLR259C	Heat shock protein 60, mitochondrial	P19882	35.31	35.3179	35.2481	35.326	2.43663	35.4966	35.5069	35.4736	35.3824	4.5192	-0.164403	0.00267986
HSP78	YDR258C	Heat shock protein 78, mitochondrial	P33416	33.0279	32.7778	32.9571	32.8113	8.2548	32.2291	32.1368	32.092	32.0636	3.3838	0.763171	3.39342e-05
HSP82	YPL240C	ATP-dependent molecular chaperone HSP82	P02829	32.4486	32.5051	32.7218	32.3727	10.719	32.5463	32.5277	32.3709	32.2049	10.1413	0.0996317	0.397316
HST1	YOL068C	NAD-dependent protein deacetylase HST1	P53685	26.1105	25.4193	25.7693	25.7527	19.5799	25.4986	25.8337	25.6134	25.6636	8.6843	0.110624	0.508432
HST2	YPL015C	NAD-dependent protein deacetylase HST2	P53686	28.1477	28.1598	28.2728	28.0739	5.74956	28.2411	28.2201	28.0807	27.9432	7.49817	0.0422697	0.618297
HSV2	YGR223C	SVP1-like protein 2	P50079	25.2474	25.4801	25.7789	25.2856	17.5694	25.3946	25.4581	25.2817	25.0201	5.68442	0.159351	0.344281
HTA2;HTA1	HTA2;HTA1	Histone H2A.2;Histone H2A.1	P04912	32.068	31.997	32.1168	32.4317	13.9942	32.5458	32.5923	32.6762	32.6532	16.9775	-0.463507	0.00363351
HTB1	YDR224C	Histone H2B.1	P02293	33.5787	33.7343	33.6596	33.4402	8.59696	33.6638	33.9813	33.7147	33.6269	6.53181	-0.143487	0.209086
HTB2	YBL002W	Histone H2B.2	P02294	24.7965	25.31	25.2759	24.2832	30.6214	25.6433	26.3797	25.4928	24.8921	27.7661	-0.685562	0.128992
HTL1	YCR020W-B	High temperature lethal protein 1	Q9URQ5	22.7285	23.1734	23.8855	22.7608	40.9846	22.4644	23.6581	23.5025	22.8603	46.7242	0.0157462	0.968915
HTS1	YPR033C	Histidine--tRNA ligase, mitochondrial	P07263-2	33.4194	33.3287	33.2886	33.4491	5.21207	33.4267	33.3386	33.3644	33.3836	6.71578	-0.0068415	0.87595
HTZ1	YOL012C	Histone H2A.Z	Q12692	29.1162	29.0038	29.2418	29.3098	9.31385	29.5862	29.9171	29.4128	29.602	6.51459	-0.461608	0.0101754
HUB1	YNR032C-A	Ubiquitin-like modifier HUB1	Q6Q546	27.0027	26.6346	26.8425	26.8569	10.327	27.6267	27.7629	27.5593	27.3283	7.49394	-0.735129	0.000799402
HUL5	YGL141W	Probable E3 ubiquitin-protein ligase HUL5	P53119	26.826	26.7117	26.5502	27.0885	16.0418	26.9256	26.6972	26.9113	26.8783	2.08501	-0.058971	0.653784
HXK1	YFR053C	Hexokinase-1	P04806	33.4659	33.3424	33.4381	33.4284	3.643	33.247	33.1752	33.2048	33.2366	16.2297	0.202804	0.000632717
HXK2	YGL253W	Hexokinase-2	P04807	35.7309	35.5303	35.5098	35.6833	7.63807	35.8999	35.8524	35.8548	35.8302	7.08945	-0.245793	0.00500097
HXT1	YHR094C	Low-affinity glucose transporter HXT1	P32465	29.0687	29.3963	29.5181	29.0169	17.0206	29.2171	29.4172	29.3082	29.1738	11.0484	-0.02908	0.835333
HXT3	YDR345C	Low-affinity glucose transporter HXT3	P32466	31.1633	30.8714	30.9618	31.1568	9.97305	31.1187	31.0837	31.1137	31.0254	3.18588	-0.0470831	0.557175
HXT4	YHR092C	Low-affinity glucose transporter HXT4	P32467	24.7614	24.5587	24.1262	24.0735	23.3232	25.6364	24.5166	23.739	24.5739	34.1626	-0.236531	0.59715
HXT7	HXT7;HXT6	High-affinity hexose transporter HXT6	P39004	26.2758	26.1573	25.0548	26.3594	33.7798	26.0977	25.8278	26.0132	25.7795	67.3885	0.0322654	0.921591
HYM1	YKL189W	Protein HYM1	P32464	24.518	24.7968	25.0877	24.3974	21.865	24.7062	25.1079	24.752	24.688	13.7626	-0.113569	0.557796
HYP2	YEL034W	Eukaryotic translation initiation factor 5A-1	P23301	34.8308	34.8732	34.858	35.0074	5.57954	34.9572	34.9012	35.012	34.7977	9.18648	-0.0246724	0.696806
HYR1	YIR037W	Peroxiredoxin HYR1	P40581	30.0837	29.4402	29.777	29.9669	18.5433	30.4061	29.8762	30.2166	30.6663	7.52934	-0.474311	0.0722126
IAH1	YOR126C	Isoamyl acetate-hydrolyzing esterase	P41734	26.6377	26.6858	26.9388	26.4012	15.3262	26.8667	27.3165	27.0054	26.7567	14.7535	-0.320458	0.0982473
IBA57	YJR122W	Putative transferase CAF17, mitochondrial	P47158	25.2132	25.5788	24.8232	25.3135	21.0047	25.4312	25.3086	25.316	24.3494	17.1622	0.130888	0.67475
IBD2	YNL164C	Protein IBD2	P53892	26.0712	26.3534	26.5783	25.9527	19.7755	25.5821	26.0904	25.6276	26.4987	25.2939	0.289191	0.305096
ICP55	YER078C	Intermediate cleaving peptidase 55	P40051	28.2453	28.1408	28.0624	28.2352	5.91867	28.0921	27.9803	28.1189	28.3532	17.5874	0.0347758	0.710789
IDH1	YNL037C	Isocitrate dehydrogenase [NAD] subunit 1, mitochondrial	P28834	31.9173	31.7037	31.8182	32.0042	8.91138	31.9846	31.9173	32.0688	32.0074	6.44373	-0.133671	0.112232
IDH2	YOR136W	Isocitrate dehydrogenase [NAD] subunit 2, mitochondrial	P28241	31.8107	31.616	31.4222	31.761	11.7425	31.8295	31.6092	31.8498	31.6269	9.31011	-0.076362	0.506995
IDI1	YPL117C	Isopentenyl-diphosphate Delta-isomerase	P15496	31.5633	31.8379	31.6528	31.7253	8.08696	31.8952	31.8662	31.7618	31.691	7.18434	-0.108693	0.196576
IDP1	YDL066W	Isocitrate dehydrogenase [NADP], mitochondrial	P21954	35.0662	34.8611	34.8021	34.9213	8.00017	34.8202	34.8515	34.8766	35.0037	3.55301	0.024626	0.735221
IDP3	IDP3;IDP2	Isocitrate dehydrogenase [NADP]	P53982	29.5067	28.0179	29.4636	28.8548	41.143	28.705	28.6604	29.0545	28.8945	20.1729	0.132177	0.725678
IDS2	YJL146W	IME2-dependent-signaling protein	P46958	26.1258	26.3846	26.3996	26.4988	10.6104	26.4899	26.5628	26.5032	26.5432	9.62119	-0.172562	0.0782674
IES1	YFL013C	Ino eighty subunit 1	P43579	28.0161	27.7945	27.7046	28.2361	16.8199	27.948	27.6913	28.0568	28.0374	14.003	0.00444299	0.976669
IES2	YNL215W	Ino eighty subunit 2	P40154	25.8356	26.1756	26.2985	26.0341	13.5343	26.2317	26.4703	26.2371	25.7818	30.7383	-0.0942802	0.609383
IES3	YLR052W	Ino eighty subunit 3	Q12345	27.3809	27.2186	27.6805	28.151	29.8607	27.7861	27.8304	27.5397	27.6244	16.1751	-0.0873951	0.699578
IES4	YOR189W	Ino eighty subunit 4	Q08561	26.0781	25.5065	25.6414	25.6377	18.4418	25.6208	24.4636	25.3831	25.8839	12.6651	0.378052	0.299656
IES6	YEL044W	Chromatin-remodeling complex subunit IES6	P32617	28.6553	28.986	28.7533	28.9205	10.4341	28.887	29.1526	29.2972	28.9883	6.53884	-0.252491	0.0761283
IFA38	YBR159W	Very-long-chain 3-oxoacyl-CoA reductase	P38286	28.798	29.3266	29.3482	29.2321	16.3798	28.949	29.1238	29.0374	28.9127	11.4111	0.170504	0.259659
IFH1	YLR223C	Protein IFH1	P39520	25.4825	24.98	25.4699	25.4733	15.6705	25.1878	25.3013	25.3072	25.3334	5.28576	0.0689672	0.609347
IFM1	YOL023W	Translation initiation factor IF-2, mitochondrial	P25038	25.547	25.933	25.9892	26.1121	15.8642	26.1582	26.0844	26.1502	25.5941	30.2493	-0.101389	0.597817
IGD1	YFR017C	Inhibitor of glycogen debranching 1	P43598	26.1793	25.3311	25.731	25.6132	25.3526	25.9722	25.8243	25.6851	25.8424	32.512	-0.117348	0.551274
IGO1	YNL157W	mRNA stability protein IGO1	P53897	27.628	27.8693	27.5725	27.6046	9.80366	27.7191	27.8666	27.6265	27.533	25.3258	-0.0177289	0.86278
IGO2	YHR132W-A	mRNA stability protein IGO2	Q9P305	27.7276	27.8757	27.8329	28.2852	18.059	28.3637	28.225	28.1574	27.7953	28.1288	-0.205005	0.27875
IKI1	YHR187W	Elongator complex protein 5	P38874	26.0441	25.9711	26.1006	26.3494	11.8195	25.5857	26.4457	25.9198	25.6936	18.622	0.205086	0.362539
IKI3	YLR384C	Elongator complex protein 1	Q06706	31.0614	30.9297	31.0905	31.0473	4.80087	30.9308	30.8924	30.8863	31.0091	3.65681	0.102607	0.0638031
ILM1	YJR118C	Protein ILM1	P47155	25.009	24.3819	24.6328	24.5405	19.3476	24.5862	24.3867	24.775	25.1717	9.5297	-0.0888154	0.692249
ILS1	YBL076C	Isoleucine--tRNA ligase, cytoplasmic	P09436	35.0773	34.923	34.9535	35.0184	4.79283	35.0565	35.0107	35.0386	35.034	5.73817	-0.0418628	0.28509
ILV1	YER086W	Threonine dehydratase, mitochondrial	P00927	33.0641	33.0489	33.2151	32.9954	6.67685	33.119	33.2041	33.0674	33.1013	2.35798	-0.0420625	0.476152
ILV2	YMR108W	Acetolactate synthase catalytic subunit, mitochondrial	P07342	34.9874	34.9771	35.0179	35.0847	3.39755	35.1363	35.1297	35.0275	35.1101	3.00393	-0.0841476	0.0523887
ILV3	YJR016C	Dihydroxy-acid dehydratase, mitochondrial	P39522	34.4602	34.1842	34.2982	34.3707	8.04036	34.3912	34.3468	34.4295	34.3886	1.67611	-0.0607148	0.356193
ILV5	YLR355C	Ketol-acid reductoisomerase, mitochondrial	P06168	36.3954	36.3278	36.2038	36.4605	7.5026	36.4505	36.6169	36.5526	36.5949	9.00281	-0.206856	0.0203548
ILV6	YCL009C	Acetolactate synthase small subunit, mitochondrial	P25605	33.251	33.1465	33.168	33.3513	6.53374	33.3459	33.4002	33.367	33.5383	3.88827	-0.183661	0.0276856
IMA2;IMA1;IMA4;IMA3	YOL157C	Oligo-1,6-glucosidase IMA2;Oligo-1,6-glucosidase IMA1;Oligo-1,6-glucosidase IMA4;Oligo-1,6-glucosidase IMA3	Q08295		22.1704	21.8223	22.7259	32.2436			22.3198		40.1223	-0.0803029
IMD2	YHR216W	Inosine-5-monophosphate dehydrogenase 2	P38697	30.1659	30.0666	30.3217	30.1211	7.77563	31.2653	31.4344	31.5039	31.4249	6.15411	-1.23825	3.03298e-06
IMD3	YLR432W	Inosine-5-monophosphate dehydrogenase 3	P50095	32.9953	32.7941	32.8651	32.8726	5.86644	33.0447	33.0252	33.0957	33.1341	7.54424	-0.19314	0.00729283
IMD4	YML056C	Inosine-5-monophosphate dehydrogenase 4	P50094	34.1293	34.0739	34.1726	34.1651	3.0938	34.24	34.3751	34.4213	34.3774	3.58273	-0.218214	0.00294269
IMG1	YCR046C	54S ribosomal protein IMG1, mitochondrial	P25626	25.9685	25.3433	25.544	25.4536	20.199	25.6171	26.2549	25.8211	25.6279	23.0207	-0.252892	0.257787
IMG2	YCR071C	54S ribosomal protein IMG2, mitochondrial	P25642	24.3455	24.9275	25.1644	24.586	24.8696	25.122	25.725	24.9701	25.0645	34.4357	-0.464554	0.111498
IMH1	YLR309C	Golgin IMH1	Q06704	30.1594	30.1778	30.0992	29.9852	5.90967	30.0131	30.1609	30.1167	29.9442	6.68068	0.0467287	0.503017
IML1	YJR138W	Vacuolar membrane-associated protein IML1	P47170	28.0831	28.3043	28.2303	28.1323	6.88937	28.4539	28.4999	28.3967	28.1709	8.5463	-0.192828	0.0713449
IML2	YJL082W	Mitochondrial outer membrane protein IML2	P47031	29.6196	29.3797	29.4395	29.6383	8.90884	29.5731	29.3696	29.4492	29.6605	9.31881	0.0061983	0.948098
IMO32	YGR031W	Abhydrolase domain-containing protein IMO32	P53219	27.2829	27.3153	27.5234	27.2837	8.32196	27.3135	27.6065	27.2801	27.5046	10.2266	-0.0748586	0.469452
IMP1	YMR150C	Mitochondrial inner membrane protease subunit 1	P28627	28.6564		29.6882	30.0515	43.6549	29.3804	29.4601	29.3204	29.3396	41.4574	0.090254	0.807601
IMP2	YMR035W	Sugar utilization regulatory protein IMP2	P32351	27.8497	27.8206	27.4094	27.8083	13.4496	27.6932	27.3734	27.7838	27.8262	13.9356	0.0528424	0.730414
IMP2	YMR035W	Mitochondrial inner membrane protease subunit 2	P46972	22.7112	23.0268	22.2938	23.6221	39.843	23.2964		23.131		41.3852	-0.300231	0.516895
IMP3	YHR148W	U3 small nucleolar ribonucleoprotein protein IMP3	P32899	26.1556	25.0996	24.949	24.8317	48.9292	26.0388	26.2777	25.8278	26.1881	27.3305	-0.824105	0.0417446
IMP4	YNL075W	U3 small nucleolar ribonucleoprotein protein IMP4	P53941	29.4938	29.9129	29.9806	29.8267	14.0963	29.7568	29.9993	29.8251	29.7227	9.05905	-0.0224822	0.862368
INH1	YDL181W	ATPase inhibitor, mitochondrial	P01097	25.9712	25.6262	26.2767	25.8042	19.6553	26.1062	25.8484	25.8773	25.2917	37.2831	0.138712	0.554177
INM1	YHR046C	Inositol monophosphatase 1	P38710	28.683	28.6442	28.5323	28.5976	4.46972	27.9943	28.3483	28.343	28.8012	15.738	0.242562	0.200138
INM2	YDR287W	Inositol monophosphatase 2	Q05533	25.7964	26.645	26.6292	25.432	39.4912	25.8731	26.0522	25.2075	25.5402	29.8953	0.457403	0.247605
INO1	YJL153C	Inositol-3-phosphate synthase	P11986	29.0377	28.8939	28.9039	29.0755	6.41165	28.7711	28.7836	28.8098	28.6851	14.6568	0.215359	0.00692184
INO80	YGL150C	Putative DNA helicase INO80	P53115	28.8304	28.6585	28.7084	28.6184	6.48702	28.5606	28.6763	28.5466	28.5965	6.18026	0.108893	0.0922078
INP51	YIL002C	Phosphatidylinositol 4,5-bisphosphate 5-phosphatase INP51	P40559	26.7507	26.1317	26.2279	25.7767	28.9351	25.4012	25.9369	26.1882	26.0566	4.65972	0.32604	0.264875
INP52	YNL106C	Polyphosphatidylinositol phosphatase INP52;SAC1-like phosphoinositide phosphatase;Phosphatidylinositol 4,5-bisphosphate 5-phosphatase	P50942	26.4505	26.4487	26.5467	26.5256	3.51867	26.4123	26.5993	26.3209	26.1174	13.3206	0.130391	0.253723
INP53	YOR109W	Polyphosphatidylinositol phosphatase INP53;SAC1-like phosphoinositide phosphatase;Phosphatidylinositol 4,5-bisphosphate 5-phosphatase	Q12271	30.1937	30.3681	30.4077	30.17	8.34665	30.2889	30.3104	30.1763	30.0808	0.713842	0.0707533	0.412785
INP54	YOL065C	Phosphatidylinositol 4,5-bisphosphate 5-phosphatase INP54	Q08227	27.4145	27.3199	27.2781	27.5909	9.87881	27.3004	27.397	27.338	27.3006	13.8034	0.0668451	0.395776
IOC2	YLR095C	ISWI one complex protein 2	Q12072	28.5656	28.9787	29.005	29.0553	14.489	28.9752	28.8941	29.0773	28.8308	9.33247	-0.043205	0.741203
IOC3	YFR013W	ISWI one complex protein 3	P43596	28.3637	28.4661	28.4548	28.4769	3.53732	28.4281	28.2543	28.4492	28.1279	6.67891	0.125517	0.16946
IOC4	YMR044W	ISWI one complex protein 4	Q04213	26.3996	26.0496	25.8721	26.371	17.328	26.0989	26.1049	26.5072	26.5007	29.5419	-0.129853	0.480661
IPI1	YHR085W	Pre-rRNA-processing protein IPI1	P38803	27.1237	26.8061	26.8893	26.6834	13.1953	26.7184	26.9706	27.2328	26.9839	10.2633	-0.100829	0.49907
IPI3	YNL182C	Pre-rRNA-processing protein IPI3	P53877	28.7832	28.7804	28.8641	28.687	5.00219	28.5837	28.7538	28.7993	28.6718	8.58334	0.0765208	0.247293
IPP1	YBR011C	Inorganic pyrophosphatase	P00817	34.246	34.0987	34.307	34.4187	9.16329	34.6066	34.4363	34.571	34.3945	1.18277	-0.234478	0.0317349
IQG1	YPL242C	Ras GTPase-activating-like protein IQG1	Q12280	24.5901	28.0208	26.1585	27.3976	80.0382	27.705	27.4909	28.182	26.1876	31.9486	-0.849629	0.365886
IRA1	YBR140C	Inhibitory regulator protein IRA1	P18963	28.6855	28.3694	28.4727	28.4932	9.33589	28.6228	28.1665	28.5506	28.46	7.19234	0.0552198	0.661416
IRA2	YOL081W	Inhibitory regulator protein IRA2	P19158	27.5022	27.6172	27.4447	27.6618	6.93639	27.4393	27.5979	27.679	27.7401	6.44828	-0.0575838	0.5099
IRC15	YPL017C	Increased recombination centers protein 15	Q02733	23.9009	24.9112	25.1799	25.9563	54.8442	23.7525	24.1724	25.1056	24.044	32.5832	0.718477	0.212819
IRC21	YMR073C	Increased recombination centers protein 21	Q04772	26.2194	25.3228	25.9428	25.879	24.2186	26.0631	26.0281	26.0835	26.2552	4.39622	-0.266475	0.219854
IRC22	YEL001C	Increased recombination centers protein 22	P40006	28.3507	28.3935	28.2174	28.8509	20.4438	28.7824	27.7058	28.689	28.1147	34.2695	0.130183	0.66743
IRC24	YIR036C	Benzil reductase ((S)-benzoin forming) IRC24	P40580	29.9708	30.104	29.8794	30.0563	6.7958	30.0861	30.2633	30.0654	29.7231	7.38509	-0.0318435	0.804749
IRC25	YLR021W	Proteasome chaperone 3	Q07951	24.9584		24.8207	24.5436	14.269	25.3846	25.441	25.0346	25.0807	16.2317	-0.461023	0.0341823
IRC5	YFR038W	Uncharacterized ATP-dependent helicase IRC5	P43610	26.3503	26.0164	25.9018	26.0659	13.7291	26.236	26.1001	26.1282	26.1289	7.43424	-0.0646905	0.541398
IRC6	YFR043C	Increased recombination centers protein 6	P43615	23.9183	23.0858	24.0703	23.4541	29.5931	24.1496	23.9895	23.6449	24.1326	10.6974	-0.347001	0.219388
IRE1	YHR079C	Serine/threonine-protein kinase/endoribonuclease IRE1;Serine/threonine-protein kinase;Endoribonuclease	P32361	22.725		23.8179	24.8737	69.3738	23.7931	23.4534	24.1974	23.7613	16.5448	0.00421717	0.994174
IRR1	YIL026C	Cohesin subunit SCC3	P40541	27.8638	27.4635	27.5252	27.341	16.2614	27.4172	27.1118	27.3809	27.3842	9.08236	0.224902	0.140661
IRS4	YKR019C	Increased rDNA silencing protein 4	P36115	21.782		22.0025	21.5762	14.7745	21.9649			22.0036	14.1169	-0.197359	0.304122
ISA1	YLL027W	Iron-sulfur assembly protein 1	Q07821	24.4881	24.0859	23.7171	24.1672	21.6521	25.2113	25.12	25.0181	24.8228	11.9445	-0.928518	0.00203886
ISA2	YPR067W	Iron-sulfur assembly protein 2	Q12425	27.3154	26.151	26.152	26.683	41.1576	26.6432	26.3992	26.5677	26.5831	12.1716	0.0270857	0.926497
ISC1	YER019W	Inositol phosphosphingolipids phospholipase C	P40015	27.0707	27.0487	26.7268	26.8707	11.0112	26.6404	26.7182	26.6364	26.9403	22.7335	0.195378	0.120268
ISD11	YER048W-A	Protein ISD11	Q6Q560	26.3211	26.5161	26.1848	25.3998	29.4168	26.2248	26.0498	26.0727	25.9368	25.9556	0.0343959	0.895855
ISN1	YOR155C	IMP-specific 5-nucleotidase 1	Q99312	28.7559	28.6036	28.5949	28.6835	5.2898	28.5876	28.532	28.5776	28.8097	8.35505	0.0327217	0.668798
IST1	YNL265C	Vacuolar protein sorting-associated protein IST1	P53843	25.4929	26.58	26.3317	26.0759	29.7281	25.9999	26.0982	26.1165	26.0298	5.0868	0.0590307	0.809787
IST2	YBR086C	Increased sodium tolerance protein 2	P38250	30.9673	31.1322	31.0839	31.1558	5.69859	30.9993	30.9385	31.0665	31.0236	6.26114	0.0778463	0.168415
ISU1	YPL135W	Iron sulfur cluster assembly protein 1, mitochondrial	Q03020	25.8251	26.4824	25.6992	26.1763	25.0743	26.3566	26.5162	26.645	26.0568	3.63117	-0.347881	0.161412
ISU2	YOR226C	Iron sulfur cluster assembly protein 2, mitochondrial	Q12056	27.5563	27.2777	27.3959	27.2441	9.99564	27.6348	27.6162	27.6141	27.4039	4.02214	-0.198752	0.0675591
ISW1	YBR245C	ISWI chromatin-remodeling complex ATPase ISW1	P38144	30.6707	30.4694	30.5832	30.6048	5.73913	30.5632	30.5123	30.6778	30.5721	5.89366	0.000666675	0.990626
ISW2	YOR304W	ISWI chromatin-remodeling complex ATPase ISW2	Q08773	27.9059	27.7354	27.4475	27.6657	12.9907	27.8059	27.6759	27.9136	27.7607	5.07594	-0.100393	0.384492
ITC1	YGL133W	Imitation switch two complex protein 1	P53125	28.2915	28.3642	28.3597	28.2871	2.91188	28.5612	28.6308	28.4729	28.4916	7.58423	-0.213491	0.0021736
ITR1	YDR497C	Myo-inositol transporter 1	P30605	27.3851	27.8434	28.2082	27.9261	22.5951	27.9679	27.7343	27.8555	27.7872	8.1744	0.00444517	0.980891
ITR2	YOL103W	Myo-inositol transporter 2	P30606	23.7145	24.0415	24.1364	23.4527	20.9792	22.7203	23.6669	23.0294	23.1349	42.1118	0.698405	0.0322075
IVY1	YDR229W	Protein IVY1	Q04934	28.3742	28.4143	28.4554	28.388	2.48913	27.7609	27.8766	27.516	27.7293	10.931	0.687269	0.000112845
IWR1	YDL115C	RNA polymerase II nuclear localization protein IWR1	Q07532	26.7112	26.9996	26.793	26.6547	10.7935	26.6753	26.7605	26.3836	26.3113	18.5063	0.256944	0.101362
IXR1	YKL032C	Intrastrand cross-link recognition protein	P33417	27.4344	27.4285	27.563	27.0939	13.2117	27.6818	27.6246	27.4986	27.3498	17.9335	-0.158787	0.24906
JAC1	YGL018C	J-type co-chaperone JAC1, mitochondrial	P53193	23.0857			22.8956	9.30449	24.0624	24.0633	24.0763		12.2625	-1.07665	0.00062492
JEM1	YJL073W	DnaJ-like chaperone JEM1	P40358	26.7487	26.7148	26.7762	26.29	14.6751	26.6759	26.8451	26.5287	26.5109	11.0015	-0.00771922	0.9574
JIP4	YDR475C	Uncharacterized protein JIP4	Q03361	27.3761	27.3621	27.4407	27.6779	10.582	27.5668	27.7416	27.6752	27.6115	4.89463	-0.18458	0.0667815
JIP5	YPR169W	WD repeat-containing protein JIP5	Q06214	27.7182	28.6139	28.573	28.2589	25.9463	28.3525	28.4874	28.2941	28.2225	8.35807	-0.0481108	0.829753
JJJ1	YNL227C	J protein JJJ1	P53863	24.6364	25.4237	25.6433	25.4692	26.8245	25.7946	25.5466	25.3208	24.6219	26.8346	-0.0278398	0.936918
JJJ3	YJR097W	Diphthamide biosynthesis protein 4	P47138	24.3225	23.688	24.1152	24.2055	17.8107	24.8902	25.1031	25.5049	25.5149	22.6624	-1.17047	0.00132311
JLP2	YMR132C	Protein JLP2	P40206	24.7903	24.7555	24.7559	24.5474	7.42287	24.4029	24.8839	24.2938	23.9443	26.2733	0.331057	0.152028
JNM1	YMR294W	Nuclear migration protein JNM1	P36224	23.6066	23.3791	23.8752	24.5265	37.1088	23.2887	23.4224	24.1541		44.9541	0.225152	0.5694
JSN1	YJR091C	Protein JSN1	P47135	28.6072	28.4948	28.6119	28.3794	7.50444	28.5043	28.5874	28.5394	28.5115	5.80396	-0.0123417	0.839113
KAE1	YKR038C	tRNA N6-adenosine threonylcarbamoyltransferase	P36132	28.2044	28.0455	28.458	27.929	16.2846	27.6773	28.0605	27.7898	28.1181	8.91147	0.247815	0.163142
KAP104	YBR017C	Importin subunit beta-2	P38217	29.3034	28.967	28.9067	29.0179	12.7616	29.1117	28.9456	29.0571	29.4489	11.5617	-0.0920812	0.533763
KAP114	YGL241W	Importin subunit beta-5	P53067	26.6925	26.4864	26.5701	26.4391	7.80992	26.8603	26.0385	26.4689	26.5199	5.93573	0.0750942	0.68698
KAP120	YPL125W	Importin beta-like protein KAP120	Q02932	26.8243	27.7535	27.6914	27.6178	25.7607	27.5087	27.5843	27.4088	27.2645	7.95295	0.0301778	0.899156
KAP122	YGL016W	Importin beta-like protein KAP122	P32767	27.961	28.1134	28.4822	27.9999	17.502	27.8622	28.3803	27.9697	27.7175	20.3644	0.156688	0.430499
KAP123	YER110C	Importin subunit beta-4	P40069	34.0306	33.8746	33.9092	34.065	6.38399	33.9147	33.806	33.8329	33.8912	4.0153	0.108657	0.0840542
KAP95	YLR347C	Importin subunit beta-1	Q06142	32.0848	31.7006	31.809	31.8999	11.4601	31.983	31.8733	31.9178	31.9003	11.2879	-0.045077	0.613376
KAR1	YNL188W	Cell division control protein KAR1	P11927	26.6534	26.4556	26.6882	27.2282	24.6649	27.4551	27.8876	26.6906	26.6123	40.1125	-0.405058	0.29041
KAR2	YJL034W	78 kDa glucose-regulated protein homolog	P16474	34.5074	34.4916	34.5052	34.5206	0.823808	34.5173	34.4533	34.5416	34.4069	3.48171	0.0264497	0.42895
KAR4	YCL055W	Karyogamy protein KAR4	P25583	23.51	24.0098	23.5868	23.7851	15.8657	23.3582	24.114	23.8889	23.3853	10.5498	0.0362782	0.873506
KCC4	YCL024W	Probable serine/threonine-protein kinase KCC4	P25389	29.1489	28.3381	28.6735	28.6809	23.8199	28.8807	28.7561	28.5262	28.8874	7.07526	-0.0522604	0.789021
KCS1	YDR017C	Inositol hexakisphosphate kinase 1	Q12494	28.4343	28.4706	28.2028	28.2997	8.48022	28.4164	28.3211	28.5378	28.6102	6.88769	-0.119516	0.228114
KEI1	YDR367W	Inositol phosphorylceramide synthase regulatory subunit KEI1;KEI1N;KEI1C	Q06346	25.9212	25.6219	25.2937	25.7553	17.7185	25.4573	24.808	25.3565	25.791	19.3488	0.294798	0.271738
KEL1	YHR158C	Kelch repeat-containing protein 1	P38853	30.2091	30.2438	30.1272	30.1736	3.44774	30.2547	30.0296	30.2134	30.2099	4.08312	0.0114942	0.844171
KEL2	YGR238C	Kelch repeat-containing protein 2	P50090	23.9704	24.0244	24.003	24.4892	18.4084	24.5855	24.831	24.1808	24.7716	7.33792	-0.47053	0.04931
KEL3	YPL263C	Kelch repeat-containing protein 3	Q08979	29.8905	29.4836	29.6381	29.5962	12.2971	29.7701	29.7001	29.7031	29.6483	12.1079	-0.0532694	0.5733
KES1	YPL145C	Protein KES1	P35844	31.9971	31.8494	32.0298	31.9775	5.35981	31.716	31.6382	31.8899	31.8491	5.4631	0.190153	0.0356586
KEX1	YGL203C	Pheromone-processing carboxypeptidase KEX1	P09620	28.1419	28.149	27.9348	28.3721	12.4249	28.147	27.9816	28.1212	28.0076	8.45773	0.0851047	0.419645
KEX2	YNL238W	Kexin	P13134	23.6298	24.0862	24.1844	24.2216	17.3336	24.3977	24.1856	23.7421	24.2405	25.8163	-0.110945	0.591795
KGD1	YIL125W	2-oxoglutarate dehydrogenase, mitochondrial	P20967	32.0086	31.654	31.7319	31.8583	10.888	31.7482	31.8302	31.8082	31.8879	4.06223	-0.00543843	0.94973
KGD2	YDR148C	Dihydrolipoyllysine-residue succinyltransferase component of 2-oxoglutarate dehydrogenase complex, mitochondrial	P19262	30.1067	30.01	30.0367	30.1004	3.2953	29.9498	29.9376	29.9524	29.9882	4.91821	0.106447	0.00662394
KIC1	YHR102W	Serine/threonine-protein kinase KIC1	P38692	27.0293	27.4394	26.9617	26.9566	17.1588	27.2066	27.2537	27.2028	27.173	8.33	-0.112256	0.372943
KIN1	YDR122W	Serine/threonine protein kinase KIN1	P13185	28.9266	28.957	28.8719	28.8791	2.80359	29.0131	29.1005	28.9707	28.5967	5.84906	-0.0116512	0.921237
KIN2	YLR096W	Serine/threonine-protein kinase KIN2	P13186	28.7542	28.947	29.03	28.9111	7.86072	28.7735	28.8607	28.7139	28.7466	5.28392	0.136914	0.0825534
KIN28	YDL108W	Serine/threonine-protein kinase KIN28	P06242	25.4327	25.4765	25.482	25.0982	11.9695	24.6106	25.1206	25.6621	25.5386	20.7996	0.139373	0.604142
KIN3	YAR018C	Serine/threonine-protein kinase KIN3	P22209	25.8759	25.9307	26.2293	25.579	18.4527	26.164	26.035	25.5013	25.6129	9.57084	0.0754188	0.729962
KIN4	YOR233W	Serine/threonine-protein kinase KIN4	Q01919	26.8345	27.3932	27.4058	26.9983	19.4567	27.2024	27.0153	27.1746	27.069	9.52914	0.0426374	0.785817
KIP3	YGL216W	Kinesin-like protein KIP3	P53086	26.3278	26.729	26.8471	25.5225	35.6848	26.28	26.3732	26.4416	26.2448	19.3518	0.021692	0.945206
KKQ8	YKL168C	Probable serine/threonine-protein kinase KKQ8	P36004	25.5077	25.4933	25.5307	25.7235	7.71421	25.818	25.9707	25.7465	25.6989	14.6555	-0.244725	0.0223506
KOG1	YHR186C	Target of rapamycin complex 1 subunit KOG1	P38873	27.7954	27.5558	27.699	27.6543	6.89089	27.8271	27.8157	27.6363	27.8686	6.91498	-0.110811	0.172632
KRE2	YDR483W	Glycolipid 2-alpha-mannosyltransferase	P27809	30.4598	30.0697	30.1734	30.1607	12.2304	30.007	29.9365	30.2302	30.2451	12.9726	0.111211	0.371311
KRE28	YDR532C	Spindle pole body component KRE28	Q04431	26.3628	27.0214	26.9568	26.6576	20.0794	26.6838	26.3791	26.4942	26.2532	33.7613	0.297052	0.143977
KRE33	YNL132W	UPF0202 protein KRE33	P53914	31.2711	31.1789	31.2305	31.1377	4.04699	31.1927	31.2229	31.393	31.1901	1.39995	-0.045112	0.454951
KRE5	YOR336W	Killer toxin-resistance protein 5	P22023	29.0429	29.0329	28.986	29.0553	2.08252	28.9344	28.7292	28.8561	28.9784	3.60889	0.154723	0.0342469
KRE6	YPR159W	Beta-glucan synthesis-associated protein KRE6	P32486	30.1561	30.0406	30.0634	29.8587	8.43342	29.8377	29.8613	29.824	29.9358	10.8293	0.165008	0.0489897
KRE9	YJL174W	Cell wall synthesis protein KRE9	P39005	25.9631	25.2787	25.3462	25.8769	24.1971	25.5585	25.9586	25.822	26.0906	8.08173	-0.241174	0.294951
KRI1	YNL308C	Protein KRI1	P42846	30.5253	30.6335	30.6504	30.6503	4.09023	30.4361	30.5636	30.4837	30.5798	5.92803	0.0990736	0.0714495
KRR1	YCL059C	KRR1 small subunit processome component	P25586	30.0316	30.0599	30.0049	29.9244	3.99927	30.0038	30.066	30.1611	29.9382	8.76427	-0.0370795	0.530326
KRS1	YDR037W	Lysine--tRNA ligase, cytoplasmic	P15180	34.7663	34.6542	34.7728	34.7549	3.79148	34.7725	34.7939	34.8833	34.7593	2.83542	-0.065175	0.149735
KSH1	YNL024C-A	Protein kish	Q8TGJ3	24.7829	22.6011	22.9425	23.1323	80.4927	22.9059		23.0696	25.0263	35.9925	-0.302563	0.723755
KSP1	YHR082C	Serine/threonine-protein kinase KSP1	P38691	28.3795	28.6134	28.3102	28.3589	9.73316	28.3679	28.6247	28.2424	28.4565	5.3143	-0.0073566	0.946402
KSS1	YGR040W	Mitogen-activated protein kinase KSS1	P14681	26.5931	26.6063	27.1306	26.4858	21.7711	26.661	26.188	27.0312	26.3573	14.4442	0.14456	0.561168
KTI12	YKL110C	Protein KTI12	P34253	28.8567	28.5818	28.3973	28.447	14.8789	28.6594	28.7623	28.8006	28.5376	7.30126	-0.11929	0.353479
KTR1	YOR099W	Alpha-1,2 mannosyltransferase KTR1	P27810	30.1021	30.0005	30.2911	30.0371	9.23878	30.0026	30.1178	30.0415	30.0828	1.48079	0.0464949	0.527269
KTR3	YBR205W	Probable mannosyltransferase KTR3	P38130	29.8509	29.7401	29.7737	29.8214	3.41432	29.9035	29.891	29.9156	29.8545	7.44454	-0.0946234	0.0148046
KTR4	YBR199W	Probable mannosyltransferase KTR4	P38131	28.0986	27.9171	27.8226	28.2079	12.0572	27.9431	27.8705	28.1762	28.1375	11.0496	-0.0202622	0.865082
KTR6	YPL053C	Mannosyltransferase KTR6	P54070	26.8306	25.8763	25.7749	26.0235	37.5995	25.8165	25.8167	25.9752	26.4444	8.6054	0.113117	0.702666
KTR7	YIL085C	Probable mannosyltransferase KTR7	P40504	25.7454	24.3785	24.2676	24.8779	51.6161	24.8854	25.0194	24.8275	24.9215	32.6946	-0.0960845	0.786389
LAA1	YJL207C	AP-1 accessory protein LAA1	P39526	27.7897	27.1605	27.2717	27.4528	19.8881	27.4596	27.3235	27.4651	27.6271	8.40004	-0.0501652	0.750915
LAC1	YKL008C	Sphingosine N-acyltransferase LAC1	P28496	27.6995	28.187	28.1263	27.9954	14.2965	28.1227	28.0522	28.1302	28.2838	9.46275	-0.145175	0.268092
LAG1	YHL003C	Sphingosine N-acyltransferase LAG1	P38703	26.6664	25.9066	25.5472	26.3179	33.2105	26.6331	25.9847	26.7146	27.2076	30.6597	-0.525474	0.183685
LAG2	YOL025W	Cullin-associated NEDD8-dissociated protein 1 homolog	Q92325	25.5791	24.9305	25.6618	26.0264	29.3216	25.0606	25.9148	25.3332	25.4548	3.85322	0.108578	0.72043
LAP2	YNL045W	Leukotriene A-4 hydrolase homolog	Q10740	30.7819	30.8397	30.812	30.8023	1.66622	31.0764	30.8302	30.8453	30.7978	2.60735	-0.0784566	0.272098
LAP3	YNL239W	Cysteine proteinase 1, mitochondrial	Q01532-2	32.0601	31.9715	31.9045	32.1123	6.3753	32.105	31.8744	31.9581	31.9457	5.09568	0.0413106	0.559394
LAP4	LAP4	Vacuolar aminopeptidase 1	P14904	32.1415	31.839	31.9145	31.9416	9.20505	31.9188	31.8449	31.8443	32.004	12.7892	0.056162	0.481537
LAS1	YKR063C	Protein LAS1	P36146	25.6313	25.9016	25.7585	25.8518	8.10742	26.0222	25.6784	25.6072	26.09	9.23374	-0.063659	0.65342
LAS17	YOR181W	Proline-rich protein LAS17	Q12446	29.5046	29.7003	29.7663	29.5019	9.4218	29.5948	29.6726	29.5624	29.5063	11.2744	0.034258	0.668625
LAS21	YJL062W	GPI ethanolamine phosphate transferase 2	P40367	24.9937	25.7081	25.5496	25.3094	20.7728	25.5432	25.4756	25.44	24.9249	10.1058	0.0442817	0.840382
LAT1	YNL071W	Dihydrolipoyllysine-residue acetyltransferase component of pyruvate dehydrogenase complex, mitochondrial	P12695	33.2449	33.1058	33.0508	33.1593	5.76673	33.1547	33.1458	33.1987	33.3185	4.94955	-0.0642444	0.305369
LCB1	YMR296C	Serine palmitoyltransferase 1	P25045	30.1878	29.7023	29.768	29.908	15.5332	29.8831	29.8289	29.9889	29.9454	6.77897	-0.0200482	0.865297
LCB2	YDR062W	Serine palmitoyltransferase 2	P40970	29.9716	29.495	29.5013	29.7328	16.1759	29.4882	29.364	29.4838	29.6777	6.27755	0.171721	0.236191
LCB3	YJL134W	Dihydrosphingosine 1-phosphate phosphatase LCB3	P47013	26.2088	26.7279	26.3874	26.2367	17.445	25.6648	25.7314	25.7882	26.1948	27.3016	0.545396	0.0178448
LCB4	YOR171C	Sphingoid long chain base kinase 4	Q12246	29.4872	29.6078	29.6327	29.5338	4.62383	29.5012	29.4067	29.5599	29.3597	4.5328	0.108488	0.102089
LCB5	YLR260W	Sphingoid long chain base kinase 5	Q06147	27.1757	27.3783	27.3294	27.2208	6.50472	27.4574	27.4198	27.4177	27.2284	2.692	-0.104795	0.183768
LCP5	YER127W	U3 small nucleolar ribonucleoprotein protein LCP5	P40079	28.5722	28.6622	28.6198	28.7068	3.98886	28.6886	28.7396	28.8782	28.9482	14.0242	-0.173389	0.0406536
LDB17	YDL146W	Protein LDB17	Q12342	27.4293	26.9321	27.6503	27.8667	25.8971	27.8637	26.8806	27.5803	27.4741	28.2263	0.0199099	0.947089
LDB19	YOR322C	Protein LDB19	Q12502	27.4314	27.69	27.5601	27.5133	7.58119	27.927	27.8018	27.6591	27.5554	2.45983	-0.187127	0.103819
LDB7	YBL006C	Chromatin structure-remodeling complex protein RSC14	P38210	27.3055	26.6377	26.8363	27.0722	20.0979	27.241	27.2888	27.1751	27.1478	10.5774	-0.250255	0.142102
LDH1	YBR204C	Lipid droplet hydrolase 1	P38139	25.7436	25.3681	25.1297	25.7993	21.3221	25.5055	25.2588	25.8678	25.7463	20.0336	-0.0844273	0.699496
LEA1	YPL213W	U2 small nuclear ribonucleoprotein A	Q08963	28.7891	28.461	28.276	27.8434	26.5547	28.2712	29.1515	28.978	28.5556	53.6348	-0.396679	0.20759
LEM3	YNL323W	Alkylphosphocholine resistance protein LEM3	P42838	28.6133	28.6783	28.6438	28.5844	2.79851	28.4876	28.792	28.3939	28.5872	9.00528	0.0648053	0.487498
LEO1	YOR123C	RNA polymerase-associated protein LEO1	P38439	30.2826	30.4425	30.4572	30.331	5.87576	30.3871	30.4846	30.4397	30.5669	16.802	-0.0912546	0.161217
LEU1	YGL009C	3-isopropylmalate dehydratase	P07264	35.2426	35.1561	35.1107	35.1773	3.82072	35.3643	35.3245	35.3272	35.3359	2.80535	-0.166308	0.00119983
LEU2	YCL018W	3-isopropylmalate dehydrogenase	P04173	36.7175	36.6646	36.7214	36.9346	8.57635	36.6885	36.6556	36.7106	36.5869	2.48244	0.09912	0.18148
LEU4	YNL104C	2-isopropylmalate synthase	P06208	34.2737	34.2023	34.1742	34.2939	3.9407	34.328	34.2308	34.2471	34.2974	5.81904	-0.0398203	0.314032
LEU9	YOR108W	2-isopropylmalate synthase 2, mitochondrial	Q12166	30.189	29.9833	30.0493	30.0427	6.15469	29.9104	29.8906	29.9094	29.9916	2.34004	0.140569	0.0285341
LGE1	YPL055C	Transcriptional regulatory protein LGE1	Q02796	26.213	26.1035	26.2022	26.1144	3.9695	26.1525	26.5732	26.1035	26.1633	1.97784	-0.0898459	0.456185
LHP1	YDL051W	La protein homolog	P33399	31.7014	32.1531	31.8477	31.8862	13.4279	31.9337	32.0671	31.9656	31.7221	7.74463	-0.0250537	0.839992
LHS1	YKL073W	Heat shock protein 70 homolog LHS1	P36016	30.1072	29.9633	29.975	30.0855	5.13833	30.2158	30.018	30.2541	30.4648	6.13408	-0.205389	0.0828154
LIA1	YJR070C	Deoxyhypusine hydroxylase	P47120	32.0461	31.9078	32.19	32.171	8.86766	32.3351	32.3173	32.4028	32.3465	5.66561	-0.271707	0.00708706
LIP1	YMR298W	Ceramide synthase subunit LIP1	Q03579	26.1008	26.5901	25.9408	26.7208	25.6152	26.8836	26.6414	26.6694	26.6898	22.5726	-0.382928	0.0984074
LIP2	YLR239C	Octanoyltransferase, mitochondrial	Q06005	25.7215	25.7406	25.5657	25.6566	5.39905	25.5651	25.3755	25.5674	25.1904	20.1967	0.246482	0.0461561
LIP5	YOR196C	Lipoyl synthase, mitochondrial	P32875	27.3965	27.0805	27.178	27.2695	9.37991	27.5787	27.3908	27.4409	27.4221	9.56839	-0.227021	0.028366
LNP1	YHR192W	Protein lunapark	P38878	27.5704	27.7017	27.7095	27.6849	4.40673	27.5052	27.419	27.3368	27.5095	9.70464	0.224002	0.00517699
LOA1	YPR139C	Lysophosphatidic acid:oleoyl-CoA acyltransferase 1	Q06508	28.0649	28.0336	27.9338	28.0557	4.10232	28.0995	28.1571	28.129	28.1593	4.24057	-0.114198	0.013904
LOC1	YFR001W	60S ribosomal subunit assembly/export protein LOC1	P43586	28.9561	29.6834	29.6248	29.6832	21.5749	29.6787	29.789	29.7459	29.3964	7.82613	-0.165619	0.435452
LOS1	YKL205W	Exportin-T	P33418	26.4559	26.5507	26.7363	26.5304	8.47843	26.6447	26.7119	26.272	26.7591	11.1492	-0.0286273	0.827597
LOT5	YKL183W	Protein LOT5	P34234	27.0172	27.3908	27.4477	27.2346	12.9231	27.3878	27.4605	27.1803	27.3342	7.1751	-0.0680989	0.56932
LOT6	YLR011W	NAD(P)H-dependent FMN reductase LOT6	Q07923	23.782	24.2238		24.5224	24.9891	24.0768	25.0911	23.0947	24.2625	21.9019	0.044809	0.93433
LPD1	YFL018C	Dihydrolipoyl dehydrogenase, mitochondrial	P09624	33.5809	33.5574	33.496	33.6544	4.55153	33.6801	33.6735	33.7065	33.6844	7.06155	-0.113924	0.0145015
LRO1	YNR008W	Phospholipid:diacylglycerol acyltransferase	P40345	27.7899	27.8492	27.856	27.5526	9.45296	27.9992	27.8847	27.9768	27.9497	10.9041	-0.190677	0.0449976
LRP1	YHR081W	Exosome complex protein LRP1	P38801	27.7718	28.0147	28.0918	27.9693	9.18933	28.0948	28.4515	28.1202	28.1559	6.79353	-0.243666	0.0637635
LRS4	YDR439W	Monopolin complex subunit LRS4	Q04087	25.312	24.8532	24.7039	25.3114	21.3051	25.7351	25.1247	24.9293	25.6786	17.8369	-0.321806	0.253242
LSB1	YGR136W	LAS seventeen-binding protein 1	P53281	29.4711	29.4848	29.4508	29.6929	8.10942	29.8876	29.7816	29.6393	29.7945	18.7962	-0.250884	0.0165828
LSB3	YFR024C-A	LAS seventeen-binding protein 3	P43603	31.5227	31.3489	31.4202	31.3315	6.10937	31.1975	31.2149	31.2227	31.3778	4.46454	0.152621	0.0446522
LSB5	YCL034W	LAS seventeen-binding protein 5	P25369	28.7213	29.0452	29.089	28.9451	10.9466	28.8134	29.0016	28.9439	28.9268	5.82428	0.0287379	0.762834
LSC1	YOR142W	Succinyl-CoA ligase [ADP-forming] subunit alpha, mitochondrial	P53598	31.8956	32.1046	32.0568	32.1084	6.7235	32.0408	31.9511	32.0634	32.0574	7.24481	0.0131823	0.822986
LSC2	YGR244C	Succinyl-CoA ligase [ADP-forming] subunit beta, mitochondrial	P53312	31.8031	31.8742	32.0552	31.7704	9.08177	31.7985	31.7733	31.7648	31.757	2.01924	0.102371	0.162328
LSG1	YGL099W	Large subunit GTPase 1	P53145	30.6155	30.766	30.6979	30.6874	4.26357	30.761	30.8093	30.7117	30.7061	3.60536	-0.0553248	0.207094
LSM1	YJL124C	Sm-like protein LSm1	P47017	29.3826	29.3969	29.3903	29.3631	1.01068	29.7241	29.8315	29.7988	29.4025	5.17251	-0.306005	0.0209101
LSM12	YHR121W	Protein LSM12	P38828	29.7465	29.6218	29.5957	29.4249	9.06698	29.7688	29.8699	29.6318	29.7449	7.63379	-0.156606	0.105741
LSM2	YBL026W	U6 snRNA-associated Sm-like protein LSm2	P38203	26.9027	26.4918	26.9951	26.5956	16.5669	27.071	27.4682	27.2493	27.5788	13.7648	-0.595538	0.0113254
LSM3	YLR438C-A	U6 snRNA-associated Sm-like protein LSm3	P57743	24.4684	23.507	23.2111	24.015	38.8226	23.976	22.8167	23.3225	23.9708	24.3422	0.278876	0.506447
LSM4	YER112W	U6 snRNA-associated Sm-like protein LSm4	P40070	29.4411	29.4863	29.3111	29.4084	5.08781	29.4129	29.2534	29.2755	29.2312	21.667	0.11848	0.0756798
LSM5	YER146W	U6 snRNA-associated Sm-like protein LSm5	P40089	25.8577	25.6315	25.5036	25.3146	15.9128	26.2044	26.4904	26.5577	26.3751	29.7182	-0.830054	0.000943714
LSM6	YDR378C	U6 snRNA-associated Sm-like protein LSm6	Q06406	29.1369	29.0133	28.8174	29.0835	9.38396	29.5474	29.8488	29.6924	29.6897	10.9406	-0.68179	0.00033176
LSM7	YNL147W	U6 snRNA-associated Sm-like protein LSm7	P53905	25.1582	25.9913	27.1054	26.286	54.6438	27.09	26.7546	26.823	26.6671	10.7104	-0.69843	0.141145
LSP1	YPL004C	Sphingolipid long chain base-responsive protein LSP1	Q12230	32.7122	32.8332	32.8208	32.734	4.2123	32.8513	32.8562	32.8108	32.7042	6.55651	-0.0305923	0.53588
LST4	YKL176C	Protein LST4	P34239	24.8765	24.5926	24.8365	25.6394	34.8028	25.5289	25.2389	24.6937	25.7886	8.0817	-0.32623	0.35605
LST8	YNL006W	Target of rapamycin complex subunit LST8	P41318	28.0902	28.7981	28.7727	28.3636	22.7245	28.3764	28.3504	28.3304	28.4146	11.1265	0.138198	0.45151
LTE1	YAL024C	Guanine nucleotide exchange factor LTE1	P07866	25.9098	26.16	25.748	25.6828	15.2193	26.3518	31.2054	26.4158	26.1137	5.91088	-1.64653	0.230582
LTP1	YPR073C	Low molecular weight phosphotyrosine protein phosphatase	P40347	30.0467	30.1977	30.2105	30.0534	6.17252	30.3755	30.3555	30.2376	30.0326	10.5754	-0.123272	0.221753
LTV1	YKL143W	Protein LTV1	P34078	28.5959	28.9647	29.1013	28.7904	14.9545	28.5787	28.8354	28.6556	28.4693	13.5891	0.228349	0.138844
LUC7	YDL087C	Protein LUC7	Q07508	24.2597	24.2819	23.1985	24.309	30.501	23.9737	25.0193	24.6829	25.3209	13.1876	-0.736967	0.11268
LYP1	YNL268W	Lysine-specific permease	P32487	26.655	26.0336	26.6521	25.9196	26.6785	25.7292	26.2122	25.7627	26.6442	20.6038	0.228022	0.464748
LYS1	YIR034C	Saccharopine dehydrogenase [NAD(+), L-lysine-forming]	P38998	32.0269	32.2269	32.0028	32.245	8.87001	32.2082	32.1395	32.2416	32.1837	6.04935	-0.0678361	0.354583
LYS12	YIL094C	Homoisocitrate dehydrogenase, mitochondrial	P40495	32.3342	32.3875	32.4721	32.4915	5.07147	32.7017	32.691	32.5463	32.5763	0.573439	-0.207511	0.00852169
LYS14	YDR034C	Lysine biosynthesis regulatory protein LYS14	P40971	25.4681	25.3051	25.1723	25.277	8.60982	25.5257	25.5764	25.2566	25.7545	10.6013	-0.222636	0.112525
LYS2	YBR115C	L-aminoadipate-semialdehyde dehydrogenase	P07702	32.4151	32.2785	32.4339	32.3526	4.8194	32.2675	32.2394	32.2651	32.3282	5.35093	0.094999	0.0544521
LYS20	YDL182W	Homocitrate synthase, cytosolic isozyme	P48570	33.649	33.5613	33.7124	33.8064	7.17174	33.8478	33.8063	33.9176	33.8044	6.69292	-0.161759	0.0317721
LYS21	YDL131W	Homocitrate synthase, mitochondrial	Q12122	31.1177	31.0296	31.0247	31.2019	5.88444	31.1521	31.0004	31.1017	31.1618	8.07291	-0.0105319	0.856853
LYS4	YDR234W	Homoaconitase, mitochondrial	P49367	31.0437	30.9925	30.9942	31.0018	1.68317	30.5605	30.592	30.5548	30.6457	4.63846	0.419794	2.27639e-06
LYS9	YNR050C	Saccharopine dehydrogenase [NADP(+), L-glutamate-forming]	P38999	31.9202	31.7074	31.8755	31.7826	6.55826	31.7407	31.7607	31.7517	31.8097	4.67787	0.0557167	0.307527
MAD1	YGL086W	Spindle assembly checkpoint component MAD1	P40957	29.5326	29.4638	29.4262	29.4244	3.54701	29.6742	29.5347	29.6919	29.5717	6.40473	-0.156369	0.0144871
MAD2	YJL030W	Mitotic spindle checkpoint component MAD2	P40958	27.9543	27.888	27.6993	27.5621	12.2265	28.2854	27.9111	28.2896	27.6265	5.22544	-0.252275	0.219056
MAE1	YKL029C	NAD-dependent malic enzyme, mitochondrial	P36013	32.9519	33.0712	33.1908	33.1093	6.82296	33.0334	33.0319	33.1061	33	6.02026	0.0379462	0.512493
MAF1	YDR005C	Repressor of RNA polymerase III transcription MAF1	P41910	26.1738	25.6838	24.9086	25.4087	36.218	25.5407	25.3357	25.4768	26.0197	18.4162	-0.0494611	0.87575
MAG1	YER142C	DNA-3-methyladenine glycosylase	P22134		25.56	26.2786	25.2289	38.7106	25.2667	25.8165	25.4104	24.8256	41.8169	0.359366	0.35731
MAG2	YLR427W	RING-finger protein MAG2	Q06436	25.013	25.2663	25.2459	24.6395	18.8986	25.2086	25.2676	25.1517	25.0757	10.1695	-0.134751	0.407537
MAK10	YEL053C	N-alpha-acetyltransferase, 35 NatC auxiliary subunit	Q02197	25.4406	24.7656	24.2052	25.0089	34.3873	24.4804	24.5988	24.4862	24.6391	19.8144	0.30394	0.288023
MAK11	YKL021C	Protein MAK11	P20484	29.3895	29.4675	29.5766	29.2533	9.36062	29.2343	29.2094	29.2196	28.9781	4.7343	0.261346	0.0287409
MAK16	YAL025C	Protein MAK16	P10962	28.4239	29.022	28.9836	28.8467	17.5229	28.707	28.8424	28.6548	28.6404	7.83748	0.107908	0.48342
MAK21	YDR060W	Ribosome biogenesis protein MAK21	Q12176	30.3715	30.3053	30.4689	30.4337	4.95989	30.3717	30.3286	30.461	30.4891	1.51904	-0.017761	0.744452
MAK32	YCR019W	Protein MAK32	P23060	23.8565	24.1856	23.98	24.0746	9.65883	23.7343	24.2848	23.6283	24.3713	19.5947	0.0195356	0.925848
MAK5	YBR142W	ATP-dependent RNA helicase MAK5	P38112	30.351	30.2999	30.3543	30.3787	2.27985	30.3529	30.5438	30.4412	30.6313	4.29231	-0.146368	0.0585423
MAM3	YOL060C	Protein MAM3	Q12296	28.5599	28.9063	28.9383	28.8633	11.3942	28.9451	28.9344	28.942	28.7775	12.6923	-0.0827932	0.422157
MAM33	YIL070C	Mitochondrial acidic protein MAM33	P40513	29.1429	29.1842	29.27	29.2057	3.69648	29.3479	29.4467	29.2866	29.2868	4.29378	-0.141312	0.0221657
MAP1	YLR244C	Methionine aminopeptidase 1	Q01662	32.0427	31.9521	32.083	31.9163	5.37137	32.0923	32.0885	32.0853	32.2188	5.7087	-0.12269	0.0515472
MAP2	YBL091C	Methionine aminopeptidase 2	P38174	31.0001	30.9911	31.0711	30.9692	3.09212	30.9677	31.0221	31.0825	31.1064	2.91397	-0.0368196	0.372279
MAS1	YLR163C	Mitochondrial-processing peptidase subunit beta	P10507	29.7518	29.7748	29.8162	29.8046	2.01776	29.8208	29.9293	29.9131	29.7126	2.6884	-0.0571266	0.313795
MAS2	YHR024C	Mitochondrial-processing peptidase subunit alpha	P11914	30.1511	30.1017	29.9985	30.1827	5.49886	30.1642	30.2592	30.2178	30.2665	3.84459	-0.118437	0.0441025
MBF1	YOR298C-A	Multiprotein-bridging factor 1	O14467	33.4761	33.7572	33.7774	33.839	10.6415	33.8597	33.9433	33.8081	33.6782	17.3353	-0.109915	0.3047
MBP1	YDL056W	Transcription factor MBP1	P39678	26.3773	26.6516	26.216	26.6369	14.3358	26.5072	26.4608	26.5309	26.85	2.89896	-0.116764	0.429913
MCA1	YOR197W	Metacaspase-1	Q08601	30.2443	29.7696	29.8187	29.9198	15.599	29.8846	30.0377	30.0865	30.4071	9.56594	-0.165879	0.320367
MCD1	YDL003W	Sister chromatid cohesion protein 1	Q12158	26.5084	26.3841	26.3376	26.4516	5.21009	26.5682	26.436	26.3135	26.1533	8.23061	0.0526677	0.603176
MCD4	YKL165C	GPI ethanolamine phosphate transferase 1	P36051	28.2074	27.8162	27.6511	27.9734	16.6231	27.9298	27.5189	27.9002	27.9205	15.7908	0.094663	0.563263
MCH4	YOL119C	Probable transporter MCH4	Q08268	23.9422	24.0483	23.4227	23.771	17.9752	24.2335	24.267	23.4302	24.1555	21.4398	-0.225514	0.38581
MCK1	YNL307C	Protein kinase MCK1	P21965	31.4192	31.4462	31.4785	31.2896	5.61412	31.2634	31.3014	31.2211	31.3521	7.63964	0.12384	0.0476926
MCM1	YMR043W	Pheromone receptor transcription factor	P11746	27.0839	27.4286	27.6447	27.1863	17.7059	27.0861	27.321	27.0294	26.7138	15.6389	0.298305	0.143541
MCM10	YIL150C	Minichromosome maintenance protein 10	P32354	24.2343	24.6857	24.9142	23.888	30.7111	24.2674	23.5923	24.3654	23.6072	17.2289	0.472496	0.177842
MCM2	YBL023C	DNA replication licensing factor MCM2	P29469	29.1676	28.8352	28.911	28.9712	10.1237	29.158	28.7089	29.0218	29.0775	11.2284	-0.0203199	0.872482
MCM22	YJR135C	Central kinetochore subunit MCM22	P47167	24.2255	23.6146	23.2924	23.5447	29.5907	23.928	23.6072	24.0104	24.5783	14.9535	-0.36166	0.248292
MCM3	YEL032W	DNA replication licensing factor MCM3	P24279	32.8647	32.8634	32.7535	32.676	6.3019	32.8512	32.7346	32.8294	32.8366	1.99846	-0.0235727	0.672139
MCM4	YPR019W	DNA replication licensing factor MCM4	P30665	30.1411	30.2666	30.2423	30.1074	5.33333	30.2592	30.3305	30.1915	30.2771	5.04717	-0.0752403	0.168296
MCM5	YLR274W	Minichromosome maintenance protein 5	P29496	30.1794	30.1819	30.3848	30.1054	8.56664	30.1598	30.0932	30.0173	30.1375	8.3879	0.110918	0.152648
MCM6	YGL201C	DNA replication licensing factor MCM6	P53091	29.7193	30.0194	30.1684	29.8264	13.922	29.8828	30.0504	29.8674	29.7938	8.43985	0.0347965	0.769928
MCM7	YBR202W	DNA replication licensing factor MCM7	P38132	28.9392	28.9519	29.0272	29.0558	3.9466	29.0312	29.1305	29.2164	29.1469	5.00062	-0.137738	0.0275899
MCR1	YKL150W	NADH-cytochrome b5 reductase 2;NADH-cytochrome b5 reductase p34 form;NADH-cytochrome b5 reductase p32 form	P36060	31.3456	31.4149	31.4267	31.2835	4.57479	31.1796	31.5191	31.3387	31.2927	7.83736	0.0351319	0.668421
MCT1	YOR221C	Malonyl CoA-acyl carrier protein transacylase, mitochondrial	Q12283	27.3481	27.0402	26.7745	27.1559	16.3042	27.03	26.8333	27.2514	27.2852	17.9333	-0.0203012	0.902951
MCX1	YBR227C	Mitochondrial clpX-like chaperone MCX1	P38323	29.479	29.3154	29.5362	29.2773	8.68119	29.2412	29.2087	29.2523	29.1943	5.30475	0.17783	0.0321347
MDE1	YJR024C	Methylthioribulose-1-phosphate dehydratase	P47095	26.5708	25.7105	25.7066	25.476	37.6417	25.7399	25.7929	25.1691	26.5379	25.6266	0.0560405	0.884625
MDG1	YNL173C	Signal transduction protein MDG1	P53885	27.5579	28.2749	28.2361	27.9118	21.8446	28.2742	28.1659	28.2312	27.958	4.55894	-0.162146	0.40496
MDH1	YKL085W	Malate dehydrogenase, mitochondrial	P17505	32.1955	32.1472	32.034	32.4244	11.6784	32.5523	32.7019	32.6577	32.257	16.5247	-0.341974	0.0384173
MDH2	YOL126C	Malate dehydrogenase, cytoplasmic	P22133	29.03	29.1213	29.237	29.0398	6.75939	29.3612	29.2841	29.1751	29.3922	4.40199	-0.196137	0.0280112
MDH3	YDL078C	Malate dehydrogenase, peroxisomal	P32419	31.6008	31.4648	31.5129	31.6397	5.531	31.8229	31.8052	31.8112	31.7316	6.74189	-0.238206	0.00184451
MDJ1	YFL016C	DnaJ homolog 1, mitochondrial	P35191	32.1511	31.9675	32.1453	32.1795	6.49436	32.0473	32.1076	32.1536	32.1884	8.05016	-0.0133532	0.823155
MDJ2	YNL328C	Mitochondrial DnaJ homolog 2	P42834	24.2202	24.1652	23.6925	24.6663	27.3475	24.1689	24.2064	23.9943	23.7451	7.91776	0.157418	0.510744
MDL1	YLR188W	ATP-dependent permease MDL1, mitochondrial	P33310	26.8704	27.0552	26.987	27.0644	6.07965	26.8893	26.918	26.9339	26.9421	8.94405	0.0734092	0.163343
MDL2	YPL270W	ATP-dependent permease MDL2, mitochondrial	P33311	28.5742	28.7889	28.8327	28.6862	7.88148	28.4761	28.6083	28.6115	28.3289	4.15151	0.214292	0.0514793
MDM10	YAL010C	Mitochondrial distribution and morphology protein 10	P18409	26.3697	26.6653	26.9416	26.6303	16.2648	26.7685	27.0509	26.3396	26.218	7.56172	0.0574882	0.807182
MDM20	YOL076W	N-terminal acetyltransferase B complex subunit MDM20	Q12387	28.9308	28.5566	28.6429	28.8111	11.6722	28.7355	28.5686	28.6936	28.9339	3.93818	0.00243901	0.983489
MDM32	YOR147W	Mitochondrial distribution and morphology protein 32	Q12171	24.1957		23.1351	24.6397	46.7865	23.8184	24.9894			49.0949	-0.413723	0.607147
MDM38	YOL027C	Mitochondrial distribution and morphology protein 38	Q08179	30.5006	30.3089	30.3767	30.2473	7.62227	30.2972	30.0397	30.1693	30.2548	9.13515	0.168097	0.0761932
MDN1	YLR106C	Midasin	Q12019	32.2121	32.0281	32.1032	32.1492	5.35801	32.1163	32.0426	32.196	32.21	4.57865	-0.0180734	0.753042
MDR1	YGR100W	GTPase-activating protein GYP2	P53258	28.7173	28.7439	28.7961	28.8637	4.50811	28.769	28.6025	28.5641	28.8432	9.70309	0.0855588	0.291246
MDS3	YGL197W	Negative regulator of sporulation MDS3	P53094	27.6792	27.7984	27.5161	27.681	7.94584	28.0261	27.4788	27.5769	27.9571	6.49865	-0.0910119	0.561028
MDV1	YJL112W	Mitochondrial division protein 1	P47025	26.5115	26.4641	26.5404	26.187	10.6734	26.1825	26.2428	26.1008	26.3204	1.23172	0.214155	0.0618932
MDY2	YOL111C	Ubiquitin-like protein MDY2	Q12285	28.1175	27.9437	27.6508	28.0826	13.9659	28.3172	28.5991	28.2783	28.2003	2.09013	-0.400074	0.0267664
MED1	YPR070W	Mediator of RNA polymerase II transcription subunit 1	Q12321	25.909	25.5406	25.0426	25.4689	24.2145	25.4077	25.2956	25.8177	25.776	27.8676	-0.0839727	0.716593
MED11	YMR112C	Mediator of RNA polymerase II transcription subunit 11	Q99278				22.2614		22.5816	22.7125		22.984	23.5934	-0.497986
MED2	YDL005C	Mediator of RNA polymerase II transcription subunit 2	Q12124	25.6652	25.7493	25.5581	26.0021	13.536	25.8225	25.8514	25.8214	26.0254	6.68164	-0.136495	0.24726
MED4	YOR174W	Mediator of RNA polymerase II transcription subunit 4	Q12343	27.2297	27.0434	27.1719	27.2512	6.32817	27.4593	27.464	27.1926	27.418	13.6327	-0.2094	0.0389535
MED6	YHR058C	Mediator of RNA polymerase II transcription subunit 6	P38782	25.7981	25.608	25.6944	25.8423	7.24079	25.733	25.9959	25.8069	25.85	19.5445	-0.110775	0.197292
MED7	YOL135C	Mediator of RNA polymerase II transcription subunit 7	Q08278	25.1417	25.4096	25.2543	25.6961	17.2249	25.5465	25.6117	25.79	25.0992	26.3481	-0.136419	0.49922
MED8	YBR193C	Mediator of RNA polymerase II transcription subunit 8	P38304	26.5503	26.3478	26.5213	26.8162	13.7081	26.7442	26.8716	26.5946	26.5667	20.6175	-0.135399	0.301744
MEF1	YLR069C	Elongation factor G, mitochondrial	P25039	29.236	29.6564	29.5535	29.2628	14.5783	29.4223	29.516	29.3666	29.1475	6.8827	0.0640582	0.641827
MEH1	YKR007W	Protein MEH1	Q02205	27.0332	26.6713	26.7528	27.0946	14.2805	27.1002	27.0034	27.0427	27.192	6.67787	-0.196607	0.128247
MES1	YGR264C	Methionine--tRNA ligase, cytoplasmic	P00958	33.8918	33.9731	33.8874	33.995	3.83718	33.9376	33.8947	33.8856	33.8352	1.06039	0.0485345	0.211876
MET10	YFR030W	Sulfite reductase [NADPH] flavoprotein component	P39692	28.6626	28.8531	28.773	28.8454	6.00913	28.8219	28.8176	28.9481	28.9134	2.59553	-0.0917455	0.146411
MET12	YPL023C	Methylenetetrahydrofolate reductase 1	P46151	28.4977	28.1009	28.1386	28.2996	12.858	28.5026	28.2484	28.3803	28.2066	6.73216	-0.0752426	0.528926
MET13	YGL125W	Methylenetetrahydrofolate reductase 2	P53128	31.4328	31.4276	31.505	31.5775	4.94392	31.2583	31.3962	31.4164	31.397	1.73981	0.118746	0.0580446
MET14	YKL001C	Adenylyl-sulfate kinase	Q02196		23.9982				24.3433	24.6977	25.062	24.4219	22.4492	-0.633066
MET17	YLR303W	Protein MET17;O-acetylhomoserine sulfhydrylase;O-acetylserine sulfhydrylase	P06106	32.3652	32.3183	32.2632	32.3686	3.39488	32.3468	32.3564	32.4722	32.63	8.28858	-0.122523	0.132759
MET18	YIL128W	DNA repair/transcription protein MET18/MMS19	P40469	26.4154	26.3565	26.1065	26.6855	16.5403	26.3018	25.7931	26.8247	26.5422	14.7707	0.0255143	0.921684
MET2	YNL277W	Homoserine O-acetyltransferase	P08465		21.0062					20.5328		21.5245	24.2923	-0.0224537
MET22	YOL064C	3(2),5-bisphosphate nucleotidase	P32179	30.9963	30.8191	30.7996	30.762	7.43209	30.7494	30.7807	30.7433	30.9963	2.49973	0.0268207	0.747549
MET3	YJR010W	Sulfate adenylyltransferase	P08536	25.4136	25.7731	26.2888	22.7408	65.4724	25.2394	25.2937	23.7228	25.3309	21.0752	0.157385	0.864455
MET4	YNL103W	Transcriptional activator of sulfur metabolism MET4	P32389	26.7036	26.6378	26.8352	26.6446	6.4855	26.3735	26.1596	26.3831	26.3554	4.88291	0.3874	0.00147482
MET5	YJR137C	Sulfite reductase [NADPH] subunit beta	P47169	29.043	29.3386	29.3379	29.2185	9.39053	29.4244	29.4368	29.3542	29.3332	8.92312	-0.152634	0.0858035
MET6	YER091C	5-methyltetrahydropteroyltriglutamate--homocysteine methyltransferase	P05694	36.6669	36.5836	36.6088	36.6707	2.98585	36.5903	36.5448	36.5654	36.4858	3.39076	0.085927	0.0324638
MET7	YOR241W	Folylpolyglutamate synthase	Q08645	28.8677	28.1483	28.465	28.2718	22.9668	28.6242	28.4107	28.4848	28.9013	3.23736	-0.167052	0.415156
MET8	YBR213W	Siroheme biosynthesis protein MET8;Precorrin-2 dehydrogenase;Sirohydrochlorin ferrochelatase	P15807	25.3202	25.5845	26.1248	25.9804	24.75	25.3457	25.4977	25.7048	25.4942	17.3071	0.241909	0.267885
MEU1	YLR017W	S-methyl-5-thioadenosine phosphorylase	Q07938	31.0336	30.8706	30.8365	30.9047	6.09324	31.1007	31.1024	31.1812	31.1028	8.95738	-0.210427	0.00437922
MEX67	YPL169C	mRNA export factor MEX67	Q99257	29.6023	29.2929	29.3596	29.3896	9.57224	29.6067	29.2875	29.4951	29.575	9.24858	-0.0799667	0.446197
MFB1	YDR219C	Mitochondrial F-box protein MFB1	Q04922	26.8586	26.7401	26.8283	26.756	3.94654	26.5001	26.745	25.9582	26.265	16.9387	0.428694	0.0454006
MFT1	YML062C	THO complex subunit MFT1	P33441	27.7497	27.6802	27.843	27.9798	9.09853	27.8525	27.7994	27.7951	27.9066	8.57326	-0.0252186	0.730531
MGA2	YIR033W	Protein MGA2	P40578	25.9733	26.115	26.1044	26.2901	9.11079	25.7343	26.4047	26.2607	26.177	4.92155	-0.023471	0.887081
MGE1	YOR232W	GrpE protein homolog, mitochondrial	P38523	30.6004	30.2389	30.4268	30.7664	15.6061	30.5529	30.416	30.5607	30.3933	37.4563	0.0274117	0.829268
MGM1	YOR211C	Dynamin-like GTPase MGM1, mitochondrial;Dynamin-like GTPase MGM1 large isoform;Dynamin-like GTPase MGM1 small isoform	P32266	28.0466	27.8918	27.8739	27.8276	6.74564	28.0714	28.0604	27.8316	27.9547	1.14151	-0.0695487	0.379637
MGM101	YJR144W	Mitochondrial genome maintenance protein MGM101	P32787	30.3551	30.2593	30.1402	30.1665	6.84524	30.1849	30.1152	30.2266	30.2908	9.43799	0.02589	0.686871
MGR1	YCL044C	Mitochondrial inner membrane i-AAA protease supercomplex subunit MGR1	P25573	28.1928	28.1772	28.1586	28.2268	2.01163	28.1637	28.0464	28.1362	28.1983	5.05635	0.0527184	0.188881
MGR2	YPL098C	Protein MGR2	Q02889	26.5312	26.1315	26.4017	26.0895	14.8437	26.0802	26.2794	26.004	26.3207	9.81288	0.11737	0.405112
MGR3	YMR115W	Mitochondrial inner membrane i-AAA protease supercomplex subunit MGR3	Q04472	28.3341	28.0791	28.1571	28.2689	7.85742	28.3714	27.9802	28.3778	28.2321	15.3877	-0.0305987	0.788405
MGS1	YNL218W	DNA-dependent ATPase MGS1	P40151	27.5439	27.8459	27.8198	26.0415	43.3104	27.0361	27.3271	27.1784	27.0129	20.9677	0.174157	0.702983
MHP1	YJL042W	MAP-homologous protein 1	P43638	29.4652	29.2696	29.2721	29.3921	6.69323	29.5626	29.4131	29.4776	29.447	7.84586	-0.125305	0.0726464
MHR1	YDR296W	Mitochondrial homologous recombination protein 1	Q06630	26.5032	26.5377	26.7792	27.0744	19.0153	26.7633	26.4763	26.8846	26.8614	18.0003	-0.0227642	0.892827
MHT1	YLL062C	Homocysteine S-methyltransferase 1	Q12525			22.0048	21.8358	8.27559
MIA40	YKL195W	Mitochondrial intermembrane space import and assembly protein 40	P36046	29.6111	29.4291	29.75	29.6174	9.01917	29.347	29.4766	29.6762	29.5524	12.1626	0.0888496	0.387587
MIC10	YCL057C-A	MICOS complex subunit MIC10	Q96VH5	27.351	27.5541	27.4514	27.4565	5.74263	27.2841	27.2717	27.6583	27.3908	21.3392	0.0520659	0.617358
MIC12	YBR262C	MICOS complex subunit MIC12	P38341	25.8605	25.9437	25.9821	25.7728	6.38667	26.3767	26.3281	26.072	26.2938	13.8189	-0.377843	0.00363971
MIC19	YFR011C	MICOS complex subunit MIC19	P43594	26.5073	26.2561	26.4853	26.9062	19.4723	26.8933	27.2645	26.9804	26.9416	15.0181	-0.481233	0.0230447
MIC26	YGR235C	MICOS subunit MIC26	P50087	27.9543	27.6196	27.9945	27.728	12.3277	27.7383	27.8373	27.6681	28.0623	3.51969	-0.00242578	0.985072
MIC27	YNL100W	MICOS complex subunit MIC27	P50945	25.31	25.0366	25.4843	25.0026	16.1394	25.621	25.8037	25.4328	25.3563	32.2385	-0.345085	0.0642414
MIC60	YKR016W	MICOS complex subunit MIC60	P36112	29.5151	29.4771	29.6783	29.4737	6.89826	29.5041	29.6175	29.5828	29.63	4.18166	-0.0475534	0.428495
MID2	YLR332W	Cell wall integrity sensor MID2	P36027	25.2354	25.2762	25.197	24.9801	8.80458	25.0646	24.5774	25.0125	24.9697	9.42383	0.266103	0.0854204
MIG1	YGL035C	Regulatory protein MIG1	P27705	26.8352	27.1881	26.9237	26.8156	12.4346	27.1766	27.0856	26.939	27.1697	14.6652	-0.152092	0.186672
MIG2	YGL209W	Regulatory protein MIG2	P53035	26.1431	25.0694	24.2437	25.3106	53.493	25.8206	24.9136	25.7033	26.1344	14.7527	-0.451273	0.373286
MIR1	YJR077C	Mitochondrial phosphate carrier protein;Mitochondrial phosphate carrier protein, N-terminally processed	P23641	32.1759	31.7088	31.6706	31.7338	17.6897	31.6453	31.6832	31.5693	31.8083	9.21742	0.145739	0.30053
MIS1	YBR084W	C-1-tetrahydrofolate synthase, mitochondrial;Methylenetetrahydrofolate dehydrogenase;Methenyltetrahydrofolate cyclohydrolase;Formyltetrahydrofolate synthetase	P09440	32.9138	32.8489	32.8438	32.8859	2.29466	32.9381	32.9865	33.0027	32.9623	3.78391	-0.0993198	0.0037977
MIT1	YEL007W	Transcriptional regulator MIT1	P40002	27.21	27.0667	26.9725	27.0862	6.82039	26.9726	26.6963	27.0604	27.2322	5.60566	0.0934545	0.472972
MIX14	YDR031W	Mitochondrial intermembrane space cysteine motif-containing protein MIX14	Q04341				24.2134			24.4169	25.2112			-0.600594
MIX17	YMR002W	Mitochondrial intermembrane space cysteine motif-containing protein MIX17	Q03667	28.1256	28.2148	28.1441	27.9575	7.37653	28.2132	28.3234	28.1754	27.817	37.6458	-0.02169	0.865252
MIX23	YBL107C	Mitochondrial intermembrane space cysteine motif-containing protein MIX23	P38162	25.4843	25.4578	26.0942	26.3857	32.0658	25.9893	26.3539	25.61	25.8271	21.6345	-0.0895496	0.758531
MKC7	YDR144C	Aspartic proteinase MKC7	P53379	27.2592	26.7451	26.727	26.9976	17.9282	26.8939	26.6745	27.415	27.2527	23.7993	-0.126809	0.567487
MKK1	YOR231W	MAP kinase kinase MKK1/SSP32	P32490	28.4482	28.4888	27.9138	28.4443	17.1908	28.6359	28.6148	28.7131	27.5993	13.1069	-0.066962	0.829684
MKK2	YPL140C	MAP kinase kinase MKK2/SSP33	P32491	27.3639	27.4102	27.8407	27.3876	16.9422	27.4386	27.4638	27.5568	27.2465	16.5029	0.0741402	0.592178
MKS1	YNL076W	Negative regulator of RAS-cAMP pathway	P34072	27.4188	27.4147	27.5246	27.1378	10.9986	27.4587	27.5098	27.4885	27.2952	7.97279	-0.0640282	0.529719
MKT1	YNL085W	Protein MKT1	P40850	29.8331	29.7251	29.6354	29.7159	5.66776	29.6845	29.6655	29.7662	29.6521	7.64041	0.0352904	0.489822
MLC1	YGL106W	Myosin light chain 1	P53141	28.8469	28.305	28.4073	28.7346	17.8183	29.1773	29.2719	29.287	29.2285	6.38579	-0.667721	0.00227388
MLC2	YPR188C	Myosin light chain 2	Q06580	24.9535	24.8793	25.0811	25.9259	38.1793	25.416	25.8821	25.1912	25.0947	35.9918	-0.186061	0.556809
MLF3	YNL074C	Protein MLF3	P32047	28.2852	28.1783	28.2329	28.0313	7.42554	28.191	28.0091	28.0731	28.25	3.19611	0.0510963	0.533757
MLH1	YMR167W	DNA mismatch repair protein MLH1	P38920	26.6755	27.8919	28.1557	26.7537	50.4001	26.5951	28.0844	27.5072	25.9475	62.2851	0.335649	0.60151
MLP1	YKR095W	Protein MLP1	Q02455	31.0888	31.1307	31.2169	31.0627	4.73831	31.0501	31.0495	31.0441	30.9554	3.8213	0.0999969	0.0503159
MLP2	YIL149C	Protein MLP2	P40457	28.7725	28.7984	28.8625	28.7762	2.91863	28.8353	28.8341	28.6227	28.7188	10.0772	0.0497113	0.403332
MLS1	YNL117W	Malate synthase 1, glyoxysomal	P30952	23.1039	26.4684		22.2495	139.277	22.4728	27.0216	22.0328		125.725	0.0982373	0.964071
MMF1	YIL051C	Protein MMF1, mitochondrial	P40185	32.4466	32.379	32.5211	32.7326	10.9503	33.1391	33.2982	33.1413	33.0409	5.98025	-0.635045	0.000492439
MMM1	YLL006W	Maintenance of mitochondrial morphology protein 1	P41800	26.1021	26.4052	26.4318	26.1756	11.3276	26.2171	26.476	26.2282	26.2421	10.1917	-0.0121764	0.909745
MMS1	YPR164W	E3 ubiquitin-protein ligase linker protein MMS1	Q06211	27.8605	28.2028	28.2714	28.1252	11.9211	28.2889	28.4274	28.1052	27.9627	12.5281	-0.0810635	0.572877
MMS2	YGL087C	Ubiquitin-conjugating enzyme variant MMS2	P53152	29.3741	28.846	29.135	29.442	17.8978	29.3501	29.375	29.1963	29.075	35.1323	-0.0498428	0.754259
MMS4	YBR098W	Crossover junction endonuclease MMS4	P38257	23.8933	24.3357		24.504	20.7821		24.1458	24.0342	25.1354		-0.194125	0.64844
MMT1	YMR177W	Mitochondrial metal transporter 1	Q03218	25.6404	25.0541	24.5601	24.6713	36.2355	24.532	24.354	24.5965	24.9862	16.3162	0.364269	0.237787
MMT2	YPL224C	Mitochondrial metal transporter 2	Q08970	26.9098	26.4984	26.4955	26.8103	14.8312	26.5607	26.4347	26.8554	26.9168	12.8107	-0.0134466	0.934723
MNL1	YHR204W	ER degradation-enhancing alpha-mannosidase-like protein 1	P38888	24.7997	24.7959	25.5359	25.2652	25.7304	26.1431	24.9014	25.7856	24.9251	109.027	-0.339629	0.383854
MNL2	YLR057W	Putative endoplasmic reticulum mannosidase MNL2	Q12205	25.7418	25.3853	24.9055	25.7775	25.8212	25.7735	25.9555	25.7847	25.9587	15.916	-0.415547	0.0940875
MNN1	YER001W	Alpha-1,3-mannosyltransferase MNN1	P39106	29.9153	29.7991	29.7723	29.658	7.32124	29.9071	29.9982	29.7414	29.9662	5.21579	-0.117074	0.183085
MNN10	YDR245W	Probable alpha-1,6-mannosyltransferase MNN10	P50108	29.1108	28.7463	28.8376	28.9194	10.992	28.3268	28.1709	28.5081	28.4985	10.577	0.527439	0.00322522
MNN11	YJL183W	Probable alpha-1,6-mannosyltransferase MNN11	P46985	30.0612	30.2563	30.449	30.1921	11.351	30.1035	30.1213	29.9464	29.8741	3.80512	0.228352	0.063991
MNN2	YBR015C	Alpha-1,2-mannosyltransferase MNN2	P38069	30.2627	30.2645	30.4081	30.0696	9.50547	30.2745	30.3608	30.2796	30.1358	6.65694	-0.0114494	0.895671
MNN5	YJL186W	Alpha-1,2-mannosyltransferase MNN5	P46982	29.3292	29.344	29.555	29.3956	7.36467	29.4373	29.33	29.3279	29.2261	3.58568	0.0756197	0.304151
MNN9	YPL050C	Mannan polymerase complexes subunit MNN9	P39107	30.1194	30.368	30.4343	30.2427	9.54276	30.1827	30.1675	30.2451	30.0504	7.09403	0.129691	0.15895
MNP1	YGL068W	54S ribosomal protein L12, mitochondrial	P53163	26.7285	26.2932	26.4426	26.3537	13.9682	26.4539	26.9155	26.383	26.4054	9.53156	-0.0849506	0.611862
MNR2	YKL064W	Manganese resistance protein MNR2	P35724	26.4264	26.4408	26.5555	26.2494	8.62033	26.2799	26.3071	26.2984	26.283	8.92294	0.125924	0.0947191
MNS1	YJR131W	Endoplasmic reticulum mannosyl-oligosaccharide 1,2-alpha-mannosidase	P32906	28.1726	27.8765	28.2736	28.0582	11.5855	28.0067	27.6619	28.046	28.0353	7.96667	0.157732	0.25562
MNT3	YIL014W	Alpha-1,3-mannosyltransferase MNT3	P40549	26.5487	26.1481	26.2074	26.5229	14.3436	26.7078	26.1284	26.1541	26.3338	12.2767	0.0257665	0.884135
MOB1	YIL106W	DBF2 kinase activator protein MOB1	P40484	27.3158	27.7784	27.5342	27.3399	15.3646	27.4881	27.735	27.3427	27.2878	7.27225	0.0286619	0.851405
MOB2	YFL034C-B	CBK1 kinase activator protein MOB2	P43563	26.233	26.4509	26.4889	26.3771	7.65648	26.1876	26.1678	26.1736	26.7848	10.0718	0.0590494	0.728504
MOD5	YOR274W	tRNA dimethylallyltransferase, mitochondrial	P07884-2	26.5432	26.3548	26.2746	26.0836	13.1806	26.3147	26.7017	26.4544	26.5254	6.67938	-0.185004	0.188438
MOG1	YJR074W	Nuclear import protein MOG1	P47123	27.1318	26.3549	26.249	26.8445	29.064	27.2078	26.4496	27.0057	27.1582	23.3465	-0.310264	0.29579
MON2	YNL297C	Protein MON2	P48563	27.3027	27.0027	27.0737	27.073	9.38568	26.8445	26.6629	27.0027	27.2025	5.00361	0.184878	0.211243
MOT1	YPL082C	TATA-binding protein-associated factor MOT1	P32333	28.8516	28.6199	28.811	28.8074	6.95681	28.6722	28.8308	28.6611	28.9289	10.651	-0.00078593	0.992749
MOT2	YER068W	General negative regulator of transcription subunit 4	P34909	28.7983	28.8201	28.5657	28.8302	8.35933	28.7798	28.7673	28.8073	28.9036	4.98329	-0.0609478	0.418303
MOT3	YMR070W	Transcriptional activator/repressor MOT3	P54785	27.1865	27.8158	28.0274	27.6385	23.3494	27.8682	27.9095	27.6108	27.6193	8.00076	-0.0848636	0.679718
MPA43	YNL249C	Protein MPA43	P53583
MPD1	YOR288C	Protein disulfide-isomerase MPD1	Q12404	27.9906	27.6907	27.6514	27.8272	10.8601	27.8002	27.8399	27.7866	27.9857	10.4373	-0.0631198	0.506145
MPD2	YOL088C	Protein disulfide isomerase MPD2	Q99316	28.4624	28.3843	28.7028	28.553	9.61945	28.3098	28.7845	28.6066	28.767	3.9434	-0.0913544	0.506929
MPE1	YKL059C	Protein MPE1	P35728	26.6285	26.5665	26.5368	26.4089	6.30458	26.7265	26.7763	26.4423	26.4628	13.0076	-0.0667862	0.522979
MPM1	YJL066C	Mitochondrial peculiar membrane protein 1	P40364	28.4407	28.3128	28.0852	28.1855	10.746	28.3821	28.3351	28.3517	28.5425	16.4397	-0.146787	0.156607
MPP10	YJR002W	U3 small nucleolar RNA-associated protein MPP10	P47083	30.0383	30.1678	30.2709	30.3521	9.29332	30.2536	30.1663	30.2598	30.2648	2.86929	-0.0288762	0.701114
MPP6	YNR024W	M-phase phosphoprotein 6 homolog	P53725	25.7853	25.6014	25.6213	25.8303	7.98885	25.8552	25.9231	26.0387	26.0109	14.8658	-0.247414	0.0132525
MPS3	YJL019W	Spindle pole body assembly component MPS3	P47069	26.4534	25.5516	25.8303	24.4855	50.5088	25.8573	25.8443	25.9877	24.715	37.1441	-0.020902	0.968447
MPT5	YGL178W	Suppressor protein MPT5	P39016	28.1939	28.3025	28.3752	27.967	11.929	27.8968	28.1191	27.6467	28.07	23.7472	0.276501	0.0938293
MRC1	YCL061C	Mediator of replication checkpoint protein 1	P25588	26.407	26.6933	27.1599	26.747	22.1444	26.687	26.8646	26.5902	26.7557	22.8464	0.0274339	0.873831
MRD1	YPR112C	Multiple RNA-binding domain-containing protein 1	Q06106	30.4422	30.4806	30.6648	30.4412	7.63956	30.3599	30.4476	30.3496	30.2606	6.12692	0.152799	0.0587439
MRE11	YMR224C	Double-strand break repair protein MRE11	P32829	26.8137	26.3209	26.4521	26.512	15.0219	26.4347	26.4387	26.6889	26.3345	4.95332	0.0504894	0.70852
MRF1	YGL143C	Peptide chain release factor 1, mitochondrial	P30775	24.3871	24.0981	24.0596	24.6646	20.1684	24.4481	24.6242	24.4494	24.7708	24.6356	-0.270774	0.143913
MRH1	YDR033W	Protein MRH1	Q12117	33.0322	33.141	33.1584	32.9899	5.67824	33.0942	33.075	33.006	32.9241	15.9089	0.055583	0.361974
MRH4	YGL064C	ATP-dependent RNA helicase MRH4, mitochondrial	P53166	26.699	26.359	26.3327	26.6143	12.7085	26.6538	26.5355	26.7987	27.0175	9.43403	-0.250154	0.120601
MRI1	YPR118W	Methylthioribose-1-phosphate isomerase	Q06489	29.9936	29.82	29.8247	30.0058	7.10103	29.7958	29.7156	29.9114	30.0999	7.61334	0.0303597	0.766953
MRL1	YPR079W	Mannose 6-phosphate receptor-like protein 1	Q06815	25.9832	24.6817	24.8331	25.1426	45.0386	24.7402	24.996	24.6094	25.4713	12.8744	0.205935	0.574868
MRM1	YOR201C	rRNA methyltransferase, mitochondrial	P25270	25.8083	25.6649	25.7699	25.3307	14.1432	25.9122	25.8582	25.889	26.0585	4.28323	-0.286042	0.0505829
MRN1	YPL184C	RNA-binding protein MRN1	Q08925	28.8608	29.0447	29.3981	28.7892	19.8286	29.0337	29.2302	28.8369	28.945	12.9248	0.0117393	0.943727
MRP1	YDR347W	37S ribosomal protein MRP1, mitochondrial	P10662	27.6149	27.3918	27.1346	27.4994	13.7423	27.8582	27.7375	27.7504	27.7844	9.68629	-0.37244	0.0126427
MRP13	YGR084C	37S ribosomal protein MRP13, mitochondrial	P12686	27.1851	27.1558	27.3256	27.2901	5.65209	27.3887	27.4844	27.5366	27.0266	8.89841	-0.119952	0.3634
MRP20	YDR405W	54S ribosomal protein L41, mitochondrial	P32387	28.0319	28.3359	28.28	28.2625	8.93292	28.6874	28.637	28.4943	27.9459	8.77795	-0.213591	0.286978
MRP4	YHL004W	37S ribosomal protein MRP4, mitochondrial	P32902	28.0125	27.4931	27.5319	27.9041	18.1083	27.8936	27.8443	27.9378	28.0874	15.1323	-0.205395	0.195345
MRP49	YKL167C	54S ribosomal protein MRP49, mitochondrial	P32388	23.4933	23.2795	23.8076	23.1716	20.1352	23.795	24.2574	24.0495	23.1594	5.6536	-0.377332	0.221145
MRP51	YPL118W	37S ribosomal protein MRP51, mitochondrial	Q02950	28.3304	28.4051	28.6176	28.3357	9.68255	28.481	28.4643	28.4211	28.4842	4.75598	-0.0404789	0.578109
MRP7	YNL005C	54S ribosomal protein L2, mitochondrial	P12687	28.3734	28.4673	28.5473	28.3942	5.52266	28.3836	28.6091	28.5428	28.4432	6.20955	-0.0491224	0.471518
MRP8	YKL142W	Uncharacterized protein MRP8	P35719	31.482	31.3492	31.6022	31.8649	15.6224	31.8111	31.9126	31.8591	31.7127	11.1491	-0.249283	0.0783652
MRPL1	YDR116C	54S ribosomal protein L1, mitochondrial	Q04599	28.6319	28.4301	28.5503	28.6435	6.68762	28.6237	28.9645	28.6546	28.8613	10.8248	-0.212093	0.0684499
MRPL10	YNL284C	54S ribosomal protein L10, mitochondrial	P36520	28.5382	28.334	28.3669	28.6332	9.89439	28.5967	28.7891	28.5484	28.4473	5.27261	-0.12729	0.253763
MRPL11	YDL202W	54S ribosomal protein L11, mitochondrial	P36521	26.6651	26.7715	26.6569	26.5936	5.16783	26.619	26.564	26.5843	26.2117	17.1465	0.17702	0.133201
MRPL13	YKR006C	54S ribosomal protein L13, mitochondrial	Q02204	29.8102	29.6656	29.6535	30.1932	18.5988	30.2731	30.1054	30.287	30.2869	11.3784	-0.407473	0.0224944
MRPL15	YLR312W-A	54S ribosomal protein L15, mitochondrial	P36523	27.0252	26.7407	26.8153	26.8305	8.64654	27.1404	27.3186	27.2845	27.4836	15.4948	-0.453859	0.00276364
MRPL16	YBL038W	54S ribosomal protein L16, mitochondrial	P38064	26.5306	26.1981	26.3114	26.5572	11.8798	26.5609	26.7657	26.55	26.7184	7.22252	-0.249432	0.0511632
MRPL17	YNL252C	54S ribosomal protein L17, mitochondrial	P36528	27.6084	27.3458	27.4176	27.6507	10.1395	27.6701	27.4802	27.4352	27.6035	4.48752	-0.0416554	0.664561
MRPL19	YNL185C	54S ribosomal protein L19, mitochondrial	P53875	25.2756	24.7553	25.0085	24.9437	15.1941	25.1553	25.4542	25.1464	25.1469	7.86504	-0.229928	0.131854
MRPL20	YKR085C	54S ribosomal protein L20, mitochondrial	P22354	27.5747	27.5122	27.8041	27.305	14.3073	27.6471	27.9852	27.4715	27.528	26.7533	-0.108964	0.506403
MRPL22	YNL177C	54S ribosomal protein L22, mitochondrial	P53881	26.5256	26.7017	26.8838	26.6137	10.8167	26.6611	26.808	26.5795	26.5632	18.6145	0.0282636	0.775581
MRPL23	YOR150W	54S ribosomal protein L23, mitochondrial	Q12487	27.7652	27.864	27.7113	27.273	16.7373	27.9867	28.4324	28.0659	28.4647	5.57764	-0.58408	0.0173964
MRPL24	YMR193W	54S ribosomal protein L24, mitochondrial	P36525	27.6116	27.4915	27.5688	27.6544	4.77682	27.5659	27.7164	27.8344	27.7031	3.25322	-0.123336	0.106543
MRPL25	YGR076C	54S ribosomal protein L25, mitochondrial	P23369	24.9053	24.9668	25.2904	24.8423	14.5667	24.8544	25.7021	25.0214	24.7054	35.6567	-0.0695911	0.783032
MRPL27	YBR282W	54S ribosomal protein L27, mitochondrial	P36526	26.1125	26.1622	26.274	26.1533	4.87247	26.3809	26.3427	26.0792	26.3046	8.81764	-0.101364	0.230743
MRPL3	YMR024W	54S ribosomal protein L3, mitochondrial	P36516	28.8049	28.4613	28.3343	28.5761	14.1519	28.9761	28.7231	28.8542	28.8601	11.8094	-0.309215	0.0333956
MRPL31	YKL138C	54S ribosomal protein L31, mitochondrial	P14063	26.2342	25.8423	25.8468	26.0866	13.4853	25.5901	25.9642	24.9098	26.4604	17.4827	0.271319	0.45591
MRPL32	YCR003W	54S ribosomal protein L32, mitochondrial	P25348	26.1094	26.6927	26.6951	26.5154	17.6955	26.3106	26.8179	26.527	25.9327	16.3423	0.106096	0.663343
MRPL33	YMR286W	54S ribosomal protein L33, mitochondrial	P20084	26.2935	26.8433	26.9841	26.8099	19.1522	26.9154	27.0418	26.9309	26.5525	9.36586	-0.127418	0.516352
MRPL35	YDR322W	54S ribosomal protein L35, mitochondrial	Q06678	27.9801	27.8552	27.7745	28.0287	7.98824	27.8845	27.925	27.9142	27.9082	9.32595	0.00164152	0.978563
MRPL36	YBR122C	54S ribosomal protein L36, mitochondrial	P36531	27.9918	28.1665	28.2641	28.3855	11.3752	28.3839	28.3344	28.1588	28.0609	5.45642	-0.0325607	0.78146
MRPL38	YKL170W	54S ribosomal protein L38, mitochondrial;54S ribosomal protein L34, mitochondrial	P35996	28.3916	27.8386	27.7247	27.6004	26.2892	27.8255	28.3593	27.8189	28.0863	17.2582	-0.133644	0.559983
MRPL4	YLR439W	54S ribosomal protein L4, mitochondrial	P36517	27.0295	26.8201	26.9659	27.0196	6.51942	27.1998	27.2157	26.9454	26.7787	6.63191	-0.0761229	0.536056
MRPL40	YPL173W	54S ribosomal protein L40, mitochondrial	P36534	28.3634	28.7215	28.4936	28.563	10.4004	28.8068	28.8426	28.723	28.26	4.94236	-0.122739	0.456571
MRPL44	YMR225C	54S ribosomal protein L44, mitochondrial	P19956	25.3987	25.2339	25.6834	25.2287	15.4533	25.6492	25.9338	25.5312	25.3337	15.7986	-0.225833	0.219324
MRPL49	YJL096W	54S ribosomal protein L49, mitochondrial	P40858	27.0368	26.8979	27.0998	26.9619	6.0891	27.2353	27.0177	27.1935	27.3918	9.8925	-0.210456	0.0550731
MRPL51	YPR100W	54S ribosomal protein L51, mitochondrial	Q06090	26.3052	25.9363	26.6983	26.0651	24.3048	26.237	26.4272	26.4755	26.8946	13.6824	-0.257359	0.281242
MRPL6	YHR147C	54S ribosomal protein L6, mitochondrial	P32904	27.7619	27.6409	27.6691	27.4981	7.47707	27.7172	28.067	27.8215	28.0084	5.21478	-0.261046	0.0371946
MRPL7	YDR237W	54S ribosomal protein L7, mitochondrial	P36519	26.9631	26.4692	26.5046	26.8067	16.7059	26.6019	26.3078	26.5769	26.6465	21.3242	0.152665	0.323279
MRPL8	YJL063C	54S ribosomal protein L8, mitochondrial	P22353	25.8601	25.0124	25.0213	24.6351	39.4058	25.8672	24.9803	25.3988	26.4062	32.1658	-0.530907	0.234149
MRPL9	YGR220C	54S ribosomal protein L9, mitochondrial	P31334	28.029	28.3103	28.3125	27.9387	13.221	28.143	28.2684	28.0563	27.9644	11.3196	0.0395566	0.744839
MRPS12	YNR036C	37S ribosomal protein S12, mitochondrial	P53732	26.828	27.0855	27.1321	27.1147	9.4221	26.9114	27.0068	27.0621	27.2225	13.2923	-0.0106309	0.915996
MRPS17	YMR188C	37S ribosomal protein S17, mitochondrial	Q03246	26.5921	26.6357	26.8243	26.3885	12.3438	26.7761	26.8087	27.0412	26.8615	33.766	-0.261712	0.0504101
MRPS18	YNL306W	37S ribosomal protein S18, mitochondrial	P42847	26.5522	25.4333	25.7593	26.1865	33.6623	26.2627	26.4938	26.4052	26.1786	14.8484	-0.352248	0.215672
MRPS28	YDR337W	37S ribosomal protein S28, mitochondrial	P21771	28.2777	27.7135	28.0273	28.578	25.2442	28.3624	28.2931	28.3387	28.2307	6.54285	-0.157105	0.430725
MRPS35	YGR165W	37S ribosomal protein S35, mitochondrial	P53292	28.7177	28.7079	28.8963	28.8147	6.22386	29.1012	29.1136	28.9033	28.8599	5.21734	-0.210359	0.0381387
MRPS5	YBR251W	37S ribosomal protein S5, mitochondrial	P33759	28.2316	28.537	28.361	28.4205	8.77912	28.4459	28.6784	28.3398	28.3214	11.4772	-0.0588532	0.591241
MRPS8	YMR158W	37S ribosomal protein S8, mitochondrial	Q03799	26.4296	26.2986	26.5556	26.7142	12.3567	26.7849	26.8637	26.5541	26.4391	14.574	-0.160951	0.271085
MRPS9	YBR146W	37S ribosomal protein S9, mitochondrial	P38120	27.1233	26.6722	26.6499	26.5069	19.7613	26.9182	26.768	27.0804	26.8521	19.7642	-0.166585	0.306314
MRS1	YIR021W	Mitochondrial RNA-splicing protein MRS1	P07266	25.9168	23.7397	25.2741	25.7081	50.0196	25.1896	24.7858	24.7565	25.3438	19.3325	0.140743	0.793114
MRS3	YJL133W	Mitochondrial RNA-splicing protein MRS3	P10566	24.1839	23.7487	23.6863	23.9223	15.9745	24.0463	24.0777	23.6685	23.7066	16.726	0.0105132	0.948297
MRS4	YKR052C	Mitochondrial RNA-splicing protein MRS4	P23500	27.731	27.5561	27.8171	25.8768	44.7102	27.5726	27.3054	27.4512	27.3758	17.0926	-0.180976	0.709336
MRS6	YOR370C	Rab proteins geranylgeranyltransferase component A	P32864	29.1041	28.962	28.8881	29.1119	7.556	29.1588	28.937	28.9201	29.2418	4.89153	-0.0479087	0.640033
MRT4	YKL009W	mRNA turnover protein 4	P33201	31.1223	30.9752	30.9431	30.9066	6.71279	30.7082	30.834	30.8417	31.0754	8.48249	0.121937	0.2242
MSA1	YOR066W	G1-specific transcription factors activator MSA1	Q08471	20.8798	20.0243	20.6473	20.9389	25.7125	20.8586	20.7398	20.753	21.185	10.4953	-0.26155	0.305373
MSA2	YKR077W	Putative transcriptional activator MSA2	P36157	23.2677		23.6781	22.1423	47.3169		22.4903	24.5858		26.2821	-0.508657	0.639717
MSB1	YOR188W	Morphogenesis-related protein MSB1	P21339	26.9264	27.545	27.4781	27.2784	18.1451	27.4167	27.3494	27.4249	27.371	9.03827	-0.0835555	0.572693
MSB3	YNL293W	GTPase-activating protein GYP3	P48566	25.4788	25.3804	25.2951	25.4066	5.23996	25.2821	24.786	25.2799	25.3629	2.91905	0.212476	0.172783
MSC1	YML128C	Meiotic sister chromatid recombination protein 1	Q03104	28.1184	27.9429	27.8327	28.1215	9.66589	27.1851	26.8634	27.7957	27.3408	22.143	0.707627	0.0139951
MSC2	YDR205W	Probable zinc transporter MSC2	Q03455	27.9084	30.6237	28.7632	29.0497	86.3046	28.8104	32.0056	29.2254	28.4155	56.3155	-0.527972	0.6137
MSC3	YLR219W	Meiotic sister-chromatid recombination protein 3	Q05812	28.5609	28.8951	28.7361	28.595	10.7755	28.7563	28.7562	28.6042	28.5195	3.95314	0.0377104	0.708639
MSC6	YOR354C	Meiotic sister-chromatid recombination protein 6, mitochondrial	Q08818	28.4169	28.089	28.1724	28.0496	11.8844	28.1507	27.8941	28.0816	28.3856	8.52871	0.0539344	0.694355
MSC7	YHR039C	Putative aldehyde dehydrogenase-like protein YHR039C	P38694	29.7556	29.5007	29.5194	29.6655	8.49985	29.6549	29.4595	29.6541	29.6132	3.76595	0.0148982	0.851989
MSD1	YPL104W	Aspartate--tRNA ligase, mitochondrial	P15179	25.2889	25.2202	25.2309	25.2797	2.38282	25.1429	24.9886	25.4674	25.172	13.3255	0.0621915	0.562501
MSF1	YPR047W	Phenylalanine--tRNA ligase, mitochondrial	P08425	26.6734	26.2504	26.5632	27.0303	22.4918	26.5119	26.4798	26.6315	26.5171	27.0073	0.0942826	0.5869
MSH2	YOL090W	DNA mismatch repair protein MSH2	P25847	29.9454	29.8955	29.9435	29.9761	2.29777	29.7809	29.5894	29.758	29.8311	4.20577	0.200301	0.0108215
MSH3	YCR092C	DNA mismatch repair protein MSH3	P25336	27.1456	26.7571	26.7779	26.8983	12.8678	27.1172	27.0299	26.968	27.1945	15.2443	-0.182679	0.123749
MSH6	YDR097C	DNA mismatch repair protein MSH6	Q03834	29.1965	29.3083	29.301	29.2241	3.85348	29.2173	29.2198	29.2133	29.0038	4.40697	0.0939389	0.169131
MSI1	YBR195C	Chromatin assembly factor 1 subunit p50	P13712	27.4944	26.8316	27.1928	27.1448	18.7275	26.8612	26.8125	27.1399	27.6864	17.184	0.0408922	0.871431
MSK1	YNL073W	Lysine--tRNA ligase, mitochondrial	P32048	26.7809	27.5983	26.8482	27.073	27.7554	27.1242	27.7188	27.1465	27.1264	30.6016	-0.203887	0.421352
MSL1	YIR009W	U2 small nuclear ribonucleoprotein B	P40567	23.5063	24.588	24.3315	23.2488	42.7898	24.5829	23.684	24.5075	23.9796	23.7755	-0.269883	0.51115
MSL5	YLR116W	Branchpoint-bridging protein	Q12186	26.897	27.1817	27.249	26.9523	11.8704	27.3143	27.3549	27.2549	27.0422	7.69731	-0.1716	0.171226
MSM1	YGR171C	Methionine--tRNA ligase, mitochondrial	P22438	27.0276	26.7542	26.6199	26.8531	11.9954	26.6967	27.0666	26.2069	26.7438	22.1381	0.135178	0.518376
MSN2	YMR037C	Zinc finger protein MSN2	P33748	27.0743	27.6302	27.3066	27.0022	20.4153	27.1373	27.1011	27.211	26.9076	7.58811	0.16406	0.332123
MSN4	YKL062W	Zinc finger protein MSN4	P33749	28.3423	28.5937	28.5883	28.4473	8.2809	28.6391	28.4798	28.3528	28.394	6.75651	0.0264381	0.773101
MSN5	YDR335W	Protein MSN5	P52918	29.2657	28.5867	28.9376	28.6671	22.0745	28.7582	28.7321	28.689	28.9882	18.9681	0.0724	0.680497
MSO1	YNR049C	Protein MSO1	P53604	24.2211	23.8389	23.2552	23.5353	29.0851	24.2322	23.8002		23.9229	10.509	-0.272443	0.355521
MSO1	YNR049C	Protein MSO1	P53604-2	27.7322	28.2207	27.8896	28.0634	14.6332	28.1887	28.2406	28.1984	27.7863	7.12299	-0.127044	0.429551
MSP1	YGR028W	Protein MSP1	P28737	26.8329	24.8698	25.268	24.7054	80.2337	25.2839	24.9463	25.4247	24.8719	22.6403	0.287319	0.589056
MSR1	YHR091C	Arginine--tRNA ligase, mitochondrial	P38714		22.603	23.0651		22.4559	23.0606	22.8385	22.7554	22.9134	44.3911	-0.0579065	0.752824
MSS116	YDR194C	ATP-dependent RNA helicase MSS116, mitochondrial	P15424	30.0601	30.0705	30.0115	30.1311	3.41776	30.0632	30.0233	30.1639	30.0575	3.43837	-0.00866864	0.831488
MSS18	YPR134W	Protein MSS18	P08593	24.8252	23.2611	23.1053	24.2012	56.657	24.506	24.3358	24.4939		49.9716	-0.59704	0.270696
MSS2	YDL107W	Protein MSS2, mitochondrial	P40990	23.4793			23.6984	10.7187	23.7492	24.1045	23.4634	23.8142	23.0883	-0.193991	0.4046
MSS4	YDR208W	Probable phosphatidylinositol 4-phosphate 5-kinase MSS4	P38994	26.9651	26.8152	26.9178	26.622	10.2272	26.7646	26.8585	26.8687	26.8264	16.8276	0.000465721	0.995522
MSS51	YLR203C	Protein MSS51, mitochondrial	P32335	29.4607	29.4597	29.6685	29.5629	7.00291	29.5942	29.6491	29.6204	29.5219	4.55209	-0.0584446	0.342876
MST1	YKL194C	Threonine--tRNA ligase, mitochondrial	P07236	25.9303	26.0453	26.9944	25.968	40.6388	26.4156	26.8778	26.1795	25.8724	23.0293	-0.101847	0.768834
MST28;MST27	YAR033W	Multicopy suppressor of SEC21 protein 28;Multicopy suppressor of SEC21 protein 27	P39552	25.3879	26.2119	25.8892	25.8975	22.4727	25.7933	25.7308	25.3213	25.1654	22.2044	0.343921	0.184454
MSW1	YDR268W	Tryptophan--tRNA ligase, mitochondrial	P04803	27.8304	27.7665	28.0612	27.8315	9.30093	27.8634	28.0676	28.0755	27.8467	6.96558	-0.0909382	0.351558
MSY1	YPL097W	Tyrosine--tRNA ligase, mitochondrial	P48527	26.2876	26.8131	26.6885	26.5288	15.2947	27.0519	26.8571	26.7389	26.4998	9.41165	-0.207436	0.247077
MTC1	YJL123C	Maintenance of telomere capping protein 1	P47018	31.2352	31.1572	31.2999	31.212	4.10424	31.2465	31.225	31.1828	31.2559	4.05067	-0.00148083	0.966398
MTD1	YKR080W	Methylenetetrahydrofolate dehydrogenase [NAD(+)]	Q02046	30.4472	30.2633	30.5167	30.32	8.03515	30.3672	30.5314	30.3415	30.5471	5.15735	-0.0600122	0.476208
MTF1	YMR228W	Mitochondrial transcription factor 1	P14908	26.8479	26.3342	26.6241	26.7945	15.2739	26.7166	26.4146	26.5408	26.4658	5.62049	0.11574	0.418119
MTF2	YDL044C	Mitochondrial transcription factor 2	P10849	26.2669	26.3895	25.4551	26.1034	25.5346	25.8245	25.8868	25.8978	26.0217	12.1919	0.146032	0.516713
MTG2	YHR168W	GTPase MTG2, mitochondrial	P38860	23.8667	24.4774	24.6504	23.6074	33.1201	24.2495	24.1628	24.1672	23.9269	9.37424	0.0238979	0.928833
MTM1	YGR257C	Mitochondrial carrier protein MTM1	P53320	25.6213	26.0756	26.1037	26.0244	14.4766	25.7187	25.7219	26.1914	25.8275	22.7441	0.0913673	0.585985
MTO1	YGL236C	Mitochondrial translation optimization protein 1	P53070	23.7945	23.7196	23.7041	23.3104	14.075	23.8479	23.5798	23.6942	24.0925	11.4297	-0.171449	0.312495
MTR10	YOR160W	mRNA transport regulator MTR10	Q99189	28.0611	27.514	27.4421	27.5847	20.9539	27.7804	27.3586	27.3741	27.4398	10.4407	0.162244	0.380365
MTR2	YKL186C	mRNA transport regulator MTR2	P34232	25.4146	25.2294	25.2745	24.4995	24.825	24.4476	25.401	25.4213	25.5725	17.3123	-0.106118	0.758117
MTR3	YGR158C	Exosome complex component MTR3	P48240	27.584	27.8545	27.9384	27.9196	10.8046	28.0282	27.6942	27.8918	27.5935	6.9395	0.0221894	0.867573
MTR4	YJL050W	ATP-dependent RNA helicase DOB1	P47047	30.8372	30.9328	30.9606	30.8299	4.60424	30.8016	31.0627	31.0283	30.9808	3.07413	-0.0782408	0.286324
MUD1	YBR119W	U1 small nuclear ribonucleoprotein A	P32605	23.4854	24.9933	23.7445	24.7823	48.7336	24.8678	24.8488	24.8443	24.7414	16.4804	-0.574184	0.176418
MUD2	YKL074C	Splicing factor MUD2	P36084	25.4071	25.3934	25.43	25.251	5.47248	25.7079	25.9187	26.1932	25.3765	27.6407	-0.428711	0.051776
MUK1	YPL070W	Protein MUK1	Q02866	27.8543	27.9801	27.8757	27.948	4.11645	28.0799	27.629	27.6859	27.9158	6.6605	0.0868884	0.454218
MUM2	YBR057C	Protein MUM2	P38236	27.2763	27.4912	27.2759	27.5907	11.0406	27.8081	27.3199	27.3566	27.5088	14.2862	-0.0898321	0.534479
MVD1	YNR043W	Diphosphomevalonate decarboxylase	P32377	32.3952	32.3244	32.3978	32.4871	4.6408	32.251	32.3012	32.3222	32.3242	8.5853	0.101481	0.0350294
MVP1	YMR004W	Sorting nexin MVP1	P40959	28.179	27.8828	28.0833	27.8386	11.2698	27.9746	27.8212	27.8178	27.9043	8.4329	0.116452	0.23966
MXR1	YER042W	Peptide methionine sulfoxide reductase	P40029	28.254	28.8596	28.566	28.9205	20.217	28.676	28.9411	28.7434	28.6145	15.6982	-0.0937655	0.598266
MXR2	YCL033C	Peptide methionine sulfoxide reductase 2	P25566	27.2042	27.5227	27.3776	27.3843	8.95878	27.3975	27.9453	27.459	27.2539	24.0243	-0.141697	0.419806
MYO1	YHR023W	Myosin-1	P08964	29.3519	29.2776	29.3757	29.1309	7.45818	29.2303	29.2288	29.3052	29.4967	2.23662	-0.0312154	0.722226
MYO2	YOR326W	Myosin-2	P19524	31.5705	31.391	31.4183	31.5144	5.81112	31.437	31.2545	31.4578	31.4575	4.70114	0.0718192	0.308949
MYO3	YKL129C	Myosin-3	P36006	30.1892	30.2582	30.1323	30.0093	7.212	30.1478	30.0974	30.0414	30.062	2.06722	0.0601211	0.336918
MYO4	YAL029C	Myosin-4	P32492	28.4873	28.2565	28.4145	28.2999	7.34176	28.1279	28.2949	28.2752	28.2985	5.9906	0.115437	0.134033
MYO5	YMR109W	Myosin-5	Q04439	31.4216	31.5246	31.4846	31.364	4.87869	31.3848	31.4318	31.3904	31.3668	2.49648	0.0552299	0.195301
NAB2	YGL122C	Nuclear polyadenylated RNA-binding protein NAB2	P32505	27.3789	27.4771	27.7017	27.0353	18.6194	27.4707	27.5114	27.4812	27.6631	40.1529	-0.133368	0.394959
NAB3	YPL190C	Nuclear polyadenylated RNA-binding protein 3	P38996	30.4032	30.1806	30.4382	30.2094	9.1095	30.4294	30.307	30.3867	30.5035	7.14652	-0.0988115	0.249799
NAB6	YML117W	RNA-binding protein NAB6	Q03735	30.9183	30.7966	30.8393	30.9521	4.92862	30.8821	30.8255	30.9307	30.9638	6.47764	-0.023947	0.625958
NAF1	YNL124W	H/ACA ribonucleoprotein complex non-core subunit NAF1	P53919	25.9287	25.3158	25.1962	25.5932	23.3397	25.6644	25.733	26.0766	26.0217	40.6976	-0.365486	0.106511
NAM2	YLR382C	Leucine--tRNA ligase, mitochondrial	P11325	25.344	24.8088	24.5078	25.0099	24.4187	25.4574	24.8889	25.5805	25.5487	25.3835	-0.451243	0.107946
NAM7	YMR080C	ATP-dependent helicase NAM7	P30771	30.6945	30.6539	30.7366	30.8132	4.75347	30.7557	30.8593	30.7784	30.6992	10.6152	-0.0485694	0.346423
NAM8	YHR086W	Protein NAM8	Q00539	26.7558	26.5856	26.8832	26.7443	8.38003	26.7982	26.6885	26.867	26.828	10.1118	-0.053173	0.488116
NAM9	YNL137C	37S ribosomal protein NAM9, mitochondrial	P27929	28.2517	27.8744	28.1047	28.2189	11.3701	28.1967	28.3976	28.1629	28.2621	10.5815	-0.142394	0.203797
NAN1	YPL126W	NET1-associated nuclear protein 1	Q02931	30.984	31.081	31.1379	31.0717	4.37187	31.1079	31.0851	31.1808	31.1476	3.11042	-0.0617078	0.157397
NAP1	YKR048C	Nucleosome assembly protein	P25293	31.8391	31.6638	31.7621	31.8314	5.54532	31.6767	31.6068	31.782	31.7997	7.46048	0.0578151	0.379826
NAR1	YNL240C	Cytosolic Fe-S cluster assembly factor NAR1	P23503	31.0338	30.6862	30.5722	30.8278	14.0271	30.9541	30.857	30.7364	30.8833	7.9477	-0.0777242	0.50371
NAS2	YIL007C	Probable 26S proteasome regulatory subunit p27	P40555	24.9511	23.5287	24.2968	24.4646	37.9137	24.4223	24.4108	24.1976	24.6525	19.5476	-0.110488	0.733276
NAS6	YGR232W	Probable 26S proteasome regulatory subunit p28	P50086	28.6146	28.5255	28.5311	28.7023	5.84141	28.741	28.8203	28.7669	28.9938	6.01929	-0.2371	0.0151668
NAT1	YDL040C	N-terminal acetyltransferase A complex subunit NAT1	P12945	31.9394	31.9543	32.1521	31.9475	7.36481	31.9782	31.9733	32.0034	31.9075	2.87304	0.0327398	0.575232
NAT2	YGR147C	N-terminal acetyltransferase 2	P37293	24.7403	25.3573	25.6585	25.2609	25.0046	25.2449	25.5265	25.1929	24.5594	14.6189	0.123343	0.674583
NAT3	YPR131C	N-terminal acetyltransferase B complex catalytic subunit NAT3	Q06504	26.7873	26.7075	26.7214	26.7334	2.44033	26.1892	26.4388	26.1022	25.8381	16.2119	0.595325	0.00313394
NAT4	YMR069W	Histone-specific N-acetyltransferase NAT4	Q04751		22.3034	22.4069		5.07372	23.0733	22.5329	22.7776			-0.439478	0.121825
NAT5	YOR253W	N-terminal acetyltransferase A complex subunit NAT5	Q08689	29.484	29.089	28.915	29.1947	16.9572	29.5794	29.5925	29.7276	29.7542	9.18913	-0.492758	0.00832967
NBA1	YOL070C	Protein NBA1	Q08229	28.7958	29.0745	29.1555	28.9121	11.1022	29.0182	28.9314	29.0574	28.8134	10.4931	0.0293513	0.772776
NBP2	YDR162C	NAP1-binding protein 2	Q12163	28.0243	27.6985	27.6167	27.8281	12.5856	27.7844	27.7959	28.0391	27.9503	19.1979	-0.100526	0.388841
NBP35	YGL091C	Cytosolic Fe-S cluster assembly factor NBP35	P52920	26.3161	26.1193	25.9997	25.883	13.0191	26.2552	26.2459	26.8168	26.2517	8.67253	-0.312903	0.113533
NCA2	YPR155C	Nuclear control of ATPase protein 2	Q12374	26.5078	25.9144	25.8205	26.1712	22.1543	25.7773	25.9297	25.9552	26.2	11.6483	0.137926	0.465269
NCB2	YDR397C	Negative cofactor 2 complex subunit beta	Q92317	24.4194	24.002	24.8868	25.471	44.332	26.0413	25.723	25.9744	26.1094	13.3971	-1.26719	0.0081796
NCE102	YPR149W	Non-classical export protein 2	Q12207	30.2972	30.5702	30.4037	30.1768	11.6744	30.3386	29.7437	30.1167	29.9673	10.1257	0.320361	0.0773016
NCE103	YNL036W	Carbonic anhydrase	P53615	27.3025	27.7972	26.3484	26.5349	47.0548	25.6254	26.3554	27.3313	26.7285	50.1917	0.485625	0.361099
NCL1	YBL024W	Multisite-specific tRNA:(cytosine-C(5))-methyltransferase	P38205	32.4005	32.4162	32.4019	32.4502	1.61219	32.5197	32.448	32.5415	32.4185	4.68349	-0.0647402	0.0840665
NCP1	YHR042W	NADPH--cytochrome P450 reductase	P16603	32.5231	32.6104	32.552	32.6335	3.53203	32.5599	32.5675	32.5616	32.616	3.80801	0.00349791	0.907262
NCR1	YPL006W	Niemann-Pick type C-related protein 1	Q12200	31.1556	31.477	31.8706	31.7312	20.9	31.5242	31.4841	31.3233	30.1873	8.23309	0.428872	0.271142
NCS2	YNL119W	Cytoplasmic tRNA 2-thiolation protein 2	P53923	26.5918	26.4672	27.1339	27.017	22.1257	26.9005	26.6435	26.6679	26.6557	19.0588	0.0855873	0.637817
NCS6	YGL211W	Cytoplasmic tRNA 2-thiolation protein 1	P53088	26.1056	26.1672	26.5731	25.859	21.2939	25.9576	26.3612	25.8396	25.9116	16.8403	0.158708	0.432815
NDC1	YML031W	Nucleoporin NDC1	P32500	28.1594	28.3691	28.4356	28.1824	9.49258	28.3007	28.3005	28.3209	28.3136	2.48616	-0.0222942	0.755903
NDE1	YMR145C	External NADH-ubiquinone oxidoreductase 1, mitochondrial	P40215	30.5814	30.6049	30.6366	30.5247	3.25521	30.2758	30.2714	30.3061	30.102	6.77179	0.348071	0.000535569
NDI1	YML120C	Rotenone-insensitive NADH-ubiquinone oxidoreductase, mitochondrial	P32340	29.0399	28.8618	28.8388	28.7778	8.01385	28.9973	29.1442	28.9764	29.1304	12.2866	-0.182509	0.0429082
NEO1	YIL048W	Probable phospholipid-transporting ATPase NEO1	P40527	27.875	27.824	27.9222	27.9245	3.26508	27.5728	27.6648	27.6429	27.9555	6.52295	0.1774	0.0896919
NET1	YJL076W	Nucleolar protein NET1	P47035	31.0022	31.1585	31.1944	31.034	6.47717	31.3489	31.2351	31.1905	31.0858	4.48329	-0.117814	0.151901
NEW1	YPL226W	[NU+] prion formation protein 1	Q08972	34.0606	34.0686	34.1321	34.0726	2.29675	34.0031	33.9579	34.0237	33.9729	1.9865	0.0940769	0.00531955
NFS1	YCL017C	Cysteine desulfurase, mitochondrial	P25374	32.0652	32.2815	32.4362	32.1397	11.5086	32.0612	32.3176	32.0491	32.0711	9.76423	0.105921	0.34869
NFU1	YKL040C	NifU-like protein, mitochondrial	P32860	29.7626	29.3706	29.4819	29.6308	11.9014	29.7885	29.4793	29.7864	29.5762	7.8878	-0.0961418	0.437228
NGG1	YDR176W	Chromatin-remodeling complexes subunit NGG1	P32494	26.5607	26.7486	26.6443	26.7653	6.56546	26.891	26.7209	26.721	26.1571	12.0552	0.0572238	0.743878
NGL2	YMR285C	RNA exonuclease NGL2	Q03264	28.1959	28.6158	28.6273	28.4795	13.2098	28.4782	28.67	28.4639	28.2948	9.19523	0.00291513	0.982335
NGL3	YML118W	Probable RNA exonuclease NGL3	Q03210		22.9327		20.526	96.5447	22.2645	22.4444		22.4328	94.5047	-0.651189	0.521689
NGR1	YBR212W	Negative growth regulatory protein NGR1	P32831	27.8471	27.637	27.7798	27.6755	6.68922	27.8598	27.9598	27.8357	27.718	22.3255	-0.108499	0.167519
NHA1	YLR138W	Na(+)/H(+) antiporter	Q99271	26.9982	27.1986	26.9383	27.1314	8.27588	27.1426	26.7662	27.1345	27.17	6.17506	0.0133314	0.909974
NHP10	YDL002C	Non-histone protein 10	Q03435	29.125	29.3057	29.2228	29.2371	5.12431	29.2499	29.6365	29.2943	29.2451	14.5603	-0.133765	0.234014
NHP2	YDL208W	H/ACA ribonucleoprotein complex subunit 2	P32495	31.7225	31.5859	31.5577	31.3963	9.21734	31.4409	31.5119	31.3964	31.8237	7.12694	0.0223488	0.855311
NHP6A	YPR052C	Non-histone chromosomal protein 6A	P11632	29.2763	28.9067	29.4335	29.3706	15.2685	29.5148	29.6928	29.4336	29.126	12.1175	-0.195043	0.287303
NHP6B	YBR089C-A	Non-histone chromosomal protein 6B	P11633	29.7411	30.4993	30.5627	30.041	25.8755	30.1736	30.5021	30.2721	30.0223	12.0427	-0.0314674	0.890688
NHX1	YDR456W	Endosomal/prevacuolar sodium/hydrogen exchanger	Q04121	23.9782	24.3527		24.369	14.5948		23.9009	23.8728		38.8473	0.346483	0.12671
NIC96	YFR002W	Nucleoporin NIC96	P34077	29.9874	30.0981	30.1755	30.1172	5.38018	30.2246	30.2189	30.1372	30.0592	4.92514	-0.0654463	0.282467
NIF3	YGL221C	Putative GTP cyclohydrolase 1 type 2	P53081	30.9969	30.889	30.9991	31.0502	4.63643	30.894	31.2082	31.1146	31.1387	4.51345	-0.105068	0.215677
NIP1	YMR309C	Eukaryotic translation initiation factor 3 subunit C	P32497	32.5887	32.3716	32.4456	32.4	6.83958	32.1984	32.2225	32.285	32.4139	4.70215	0.171536	0.0455488
NIP7	YPL211W	60S ribosome subunit biogenesis protein NIP7	Q08962	30.5595	30.2051	30.1476	30.3165	13.0902	30.1248	30.0349	30.0506	30.306	3.71347	0.178087	0.157484
NIT2	YJL126W	Probable hydrolase NIT2	P47016	24.602	23.9781	24.8579	24.2293	26.7812	25.0712	24.2138	25.705	24.9236	41.392	-0.561557	0.172759
NIT3	YLR351C	Probable hydrolase NIT3	P49954	30.456	30.2826	30.3845	30.3647	4.9293	30.262	30.2995	30.3072	30.5095	5.00025	0.0274276	0.69332
NKP1	YDR383C	Central kinetochore subunit NKP1	Q12493	22.6381		23.5398	24.2666	52.8998	23.0474	23.4595	22.7863	23.1955	13.7956	0.359298	0.439286
NMA1	YLR328W	Nicotinamide-nucleotide adenylyltransferase 1	Q06178	29.461	29.7093	29.778	29.6049	9.40818	29.4693	29.6473	29.4602	29.3114	14.7722	0.16623	0.138657
NMA111	YNL123W	Pro-apoptotic serine protease NMA111	P53920	30.4819	30.7339	30.5489	30.6202	7.54209	30.6614	30.6535	30.5466	30.64	3.03486	-0.0291522	0.644894
NMA2	YGR010W	Nicotinamide-nucleotide adenylyltransferase 2	P53204	26.5619	26.811	27.1885	26.9575	18.0927	26.7762	27.0875	26.9515	26.4855	19.1827	0.0545347	0.777821
NMD2	YHR077C	Nonsense-mediated mRNA decay protein 2	P38798	27.5471	26.8683	26.5833	26.7794	31.9396	27.6006	27.1323	27.28	27.9882	25.8017	-0.555727	0.0968534
NMD3	YHR170W	60S ribosomal export protein NMD3	P38861	30.2215	30.0427	30.1104	30.0986	5.25826	29.8528	29.7986	29.9392	30.0169	4.99783	0.216409	0.012018
NMD4	YLR363C	Nonsense-mediated decay protein 4	Q12129	24.3237		23.6243	23.6438	29.3841	24.2211	23.7141	23.8974	24.1328	17.1992	-0.127413	0.611833
NMD5	YJR132W	Nonsense-mediated mRNA decay protein 5	P46970	27.5439	27.85	27.9221	28.028	13.7397	27.8471	27.8046	27.7792	27.8317	5.94231	0.0203345	0.852927
NMT1	YLR195C	Glycylpeptide N-tetradecanoyltransferase	P14743	29.842	30.0316	30.1629	30.0624	9.08834	30.086	29.9584	30.075	29.8207	3.38779	0.0397193	0.678634
NNF2	YGR089W	Protein NNF2	P53253	25.9181	26.0038	26.1999	25.7118	13.9728	25.8166	25.7335	26.0258	25.6134	16.5513	0.161069	0.272424
NNT1	YLR285W	Putative nicotinamide N-methyltransferase	Q05874	29.6394	29.1308	29.0923	29.5862	19.9624	29.3395	29.2766	29.548	29.775	12.6288	-0.122617	0.529838
NOB1	YOR056C	20S-pre-rRNA D-site endonuclease NOB1	Q08444	29.6251	29.5818	29.5962	29.5495	2.17684	29.5085	29.5416	29.4238	29.5166	5.77705	0.0905517	0.0235497
NOC2	YOR206W	Nucleolar complex protein 2	P39744	30.8781	30.9941	31.0076	30.8948	4.61373	30.8766	30.848	31.065	30.8219	3.41194	0.040743	0.55063
NOC3	YLR002C	Nucleolar complex-associated protein 3	Q07896	29.1841	29.0571	29.1129	29.2728	6.50023	29.3337	29.2045	29.4273	29.4699	6.67266	-0.202142	0.0358448
NOC4	YPR144C	Nucleolar complex protein 4	Q06512	27.814	27.1843	27.2786	27.347	20.8969	27.176	27.072	27.2356	27.4773	8.16109	0.165733	0.352038
NOG1	YPL093W	Nucleolar GTP-binding protein 1	Q02892	31.0216	31.1714	31.1778	31.1044	4.98252	31.0865	31.0318	31.2353	31.1487	4.81261	-0.00674157	0.909495
NOG2	YNR053C	Nucleolar GTP-binding protein 2	P53742	30.7383	30.5803	30.6994	30.483	7.97259	30.3418	30.5071	30.4642	30.6743	7.27468	0.128386	0.203686
NOP1	YDL014W	rRNA 2-O-methyltransferase fibrillarin	P15646	34.179	34.1063	34.0582	34.2371	5.47742	34.318	34.3071	34.3724	34.3524	3.99458	-0.192345	0.00388528
NOP10	YHR072W-A	H/ACA ribonucleoprotein complex subunit 3	Q6Q547	26.56	26.7135	27.0495	26.468	18.545	27.0542	27.3848	27.0942	26.9187	11.4257	-0.415237	0.0418468
NOP12	YOL041C	Nucleolar protein 12	Q08208	31.335	31.3789	31.519	31.3379	6.15053	31.2813	31.3801	31.3078	31.0559	8.44142	0.136418	0.148357
NOP13	YNL175C	Nucleolar protein 13	P53883	30.936	31.2858	31.3009	31.032	12.5475	31.098	31.1621	31.1266	30.9081	7.11351	0.0649844	0.568175
NOP14	YDL148C	Nucleolar complex protein 14	Q99207	30.1177	30.1029	30.2664	29.9578	8.74861	29.9769	29.9786	29.9847	30.1331	5.94448	0.0928836	0.254821
NOP15	YNL110C	Ribosome biogenesis protein 15	P53927	29.7831	30.3862	29.992	29.9485	18.6391	29.8897	29.8304	29.9225	29.7446	16.0669	0.180642	0.22507
NOP16	YER002W	Nucleolar protein 16	P40007	30.8176	31.0562	31.1921	30.7556	14.2467	30.7766	30.9981	30.8316	30.8154	10.5304	0.0999366	0.411385
NOP19	YGR251W	Nucleolar protein 19	P53317	25.2274	24.8772	25.3255	25.1269	12.8839	24.811	25.0595	25.1762	25.6357	31.2123	-0.0313442	0.879271
NOP2	YNL061W	25S rRNA (cytosine(2870)-C(5))-methyltransferase	P40991	31.0788	31.1237	31.1231	31.0305	3.05109	31.0439	31.222	31.0612	31.0332	9.39594	-0.00105587	0.983706
NOP4	YPL043W	Nucleolar protein 4	P37838	30.1871	30.2756	30.2881	30.2186	3.29706	30.2619	30.4955	30.2581	30.3577	6.88847	-0.100965	0.146811
NOP53	YPL146C	Ribosome biogenesis protein NOP53	Q12080	29.6432	29.9157	30.055	29.6701	13.8909	29.8808	29.96	29.7832	29.7454	6.09405	-0.021349	0.853086
NOP56	YLR197W	Nucleolar protein 56	Q12460	33.7209	33.505	33.6407	33.6821	6.37539	33.5492	33.5623	33.5267	33.7126	1.62909	0.0494561	0.463828
NOP58	YOR310C	Nucleolar protein 58	Q12499	33.4803	33.3066	33.3223	33.3107	5.97267	33.3406	33.1908	33.2586	33.2908	5.60856	0.0847781	0.156442
NOP6	YDL213C	Nucleolar protein 6	Q07623	30.1663	30.4513	30.6571	30.2402	15.6458	30.3466	30.5081	30.4429	30.3349	10.3308	-0.0294052	0.811716
NOP7	YGR103W	Pescadillo homolog	P53261	31.1418	31.017	31.0202	30.99	4.79069	30.8143	30.8879	31.0219	31.1501	6.67333	0.0737006	0.401147
NOP8	YOL144W	60S ribosome subunit biogenesis protein NOP8	Q08287	28.6742	28.7738	28.956	28.8365	8.21133	28.9479	28.8773	28.8465	28.5549	7.97118	0.00346	0.97472
NOP9	YJL010C	Nucleolar protein 9	P47077	28.998	28.7966	28.5324	28.8712	13.1673	28.4964	28.6165	28.8051	28.8052	6.46106	0.118738	0.375754
NOT3	YIL038C	General negative regulator of transcription subunit 3	P06102	29.6825	29.722	29.8754	29.6904	6.42421	29.7557	29.7138	29.7517	29.7163	7.37288	0.00823658	0.865114
NOT5	YPR072W	General negative regulator of transcription subunit 5	Q12514	30.0958	29.997	30.007	29.9537	4.18064	29.9136	29.9397	29.9837	29.9137	8.37884	0.0757055	0.0682151
NPA3	YJR072C	GTPase NPA3	P47122	29.7493	29.7138	29.7972	29.7228	2.61424	29.631	29.5905	29.4991	29.571	1.2153	0.172848	0.00204624
NPC2	YDL046W	Phosphatidylglycerol/phosphatidylinositol transfer protein	Q12408	27.1946	27.4534	27.4532	27.5746	10.7206	27.6248	27.7759	27.5856	27.5583	10.2291	-0.217209	0.0594357
NPL3	YDR432W	Nucleolar protein 3	Q01560	32.2172	32.5969	32.6154	32.602	12.5297	32.6587	32.7448	32.6599	32.5318	8.46334	-0.140912	0.233763
NPL4	YBR170C	Nuclear protein localization protein 4	P33755	28.9619	28.9871	29.2738	29.0527	10.2087	29.0637	29.0131	29.191	29.0802	8.41038	-0.0181564	0.828476
NPL6	YMR091C	Chromatin structure-remodeling complex subunit RSC7	P32832	29.8	29.6769	29.7099	29.8318	5.06684	29.8806	29.793	29.8931	29.7023	7.48301	-0.0626002	0.317747
NPP1	YCR026C	Ectonucleotide pyrophosphatase/phosphodiesterase 1;Alkaline phosphodiesterase 1;Nucleotide pyrophosphatase	P25353	26.9125	27.0997	27.1749	26.7918	11.9849	27.0097	26.9836	26.9633	26.9401	15.733	0.0205523	0.824147
NPR1	YNL183C	Nitrogen permease reactivator protein	P22211	28.702	28.8207	28.6336	28.459	10.332	28.7778	28.5571	28.8693	28.7002	9.22963	-0.0722792	0.498636
NPR2	YEL062W	Nitrogen permease regulator 2	P39923	26.666	26.8836	26.7675	26.4264	13.0843	26.5188	26.6299	26.9807	26.5413	6.18426	0.0182067	0.903927
NPR3	YHL023C	Nitrogen permease regulator 3	P38742	26.312	26.3837	26.3887	26.8474	18.3188	26.362	26.657	26.122	26.5316	4.84372	0.0647748	0.714285
NPT1	YOR209C	Nicotinate phosphoribosyltransferase	P39683	32.2605	32.2242	32.2493	32.2595	1.16387	32.2067	32.2186	32.2085	32.1889	4.82027	0.0427178	0.00647415
NPY1	YGL067W	NADH pyrophosphatase	P53164	27.2304	27.3577	27.319	27.2237	4.60191	27.0167	27.0579	27.1545	26.9586	12.9948	0.235778	0.00429064
NQM1	YGR043C	Transaldolase NQM1	P53228	27.5057	27.9269	27.4391	27.9207	17.9753	27.5724	28.0329	27.8854	26.9239	7.30004	0.0944583	0.746289
NRD1	YNL251C	Protein NRD1	P53617	29.2349	28.9236	29.0156	29.0613	9.22283	28.8133	28.9195	28.7548	28.8751	8.45624	0.218156	0.026393
NRK1	YNL129W	Nicotinamide riboside kinase	P53915	27.6834	27.6525	27.5298	27.5235	5.72782	27.3973	27.3752	27.5292	27.4594	17.219	0.157008	0.0268114
NRM1	YNR009W	Transcription factor NRM1	P53718	23.303	24.6204	23.6969	23.2947	49.0012	24.4783	23.8354	23.8814	25.1587	33.097	-0.609703	0.214873
NRP1	YDL167C	Asparagine-rich protein	P32770	27.8873	28.0495	28.1499	28.0496	7.4151	27.9001	28.0904	27.8816	27.8819	13.9986	0.0955619	0.246417
NSA1	YGL111W	Ribosome biogenesis protein NSA1	P53136	29.4776	29.4286	29.5912	29.3802	6.3578	29.1926	29.4099	29.2585	29.2964	4.03765	0.180045	0.0309391
NSA2	YER126C	Ribosome biogenesis protein NSA2	P40078	30.4565	30.5184	30.5347	30.6665	6.2259	30.6246	30.6431	30.473	30.4133	5.96364	0.00556692	0.940661
NSE3	YDR288W	Non-structural maintenance of chromosome element 3	Q05541	26.6016	26.0425	26.3121	26.4783	16.2041	26.6404	26.2491	26.2757	26.7167	11.34	-0.11186	0.537835
NSE4	YDL105W	Non-structural maintenance of chromosome element 4	P43124	25.0662	24.7353	24.8896	24.8055	10.1123	24.5696	24.466	24.3769	24.5053	13.2463	0.394669	0.00295362
NSG1	YHR133C	Protein NSG1	P38837	28.416	28.8902	28.5542	28.8131	15.143	28.6902	28.4291	28.6426	28.5271	11.2076	0.0961463	0.471884
NSG2	YNL156C	Protein NSG2	P53898	27.9052	28.2585	28.2236	28.3286	12.2896	27.8569	28.212	28.2449	27.7253	10.4956	0.169254	0.330046
NSP1	YJL041W	Nucleoporin NSP1	P14907	32.5941	32.8904	32.8449	32.7722	8.77326	32.7849	32.786	32.7624	32.7324	7.64719	0.00897006	0.896876
NSR1	YGR159C	Nuclear localization sequence-binding protein	P27476	33.7556	33.9475	33.8616	33.8355	5.48862	33.7853	34.0013	33.8506	33.7844	10.6713	-0.0053478	0.93668
NST1	YNL091W	Stress response protein NST1	P53935	27.9418	27.708	28.1106	27.7278	13.4757	27.6997	27.7796	27.59	27.826	2.19223	0.148241	0.221223
NTA1	YJR062C	Protein N-terminal amidase	P40354	27.0736	26.8824	26.9504	27.2702	12.0861	27.2753	27.0075	26.8163	27.3509	15.5432	-0.0683939	0.663904
NTE1	YML059C	Lysophospholipase NTE1	Q04958	29.6991	29.942	30.0458	29.7853	10.7868	29.8947	29.8704	29.8489	29.8031	5.03708	0.0137739	0.869143
NTF2	YER009W	Nuclear transport factor 2	P33331	31.879	31.1489	31.3494	31.8181	24.0464	32.1086	32.0205	32.004	32.0609	10.9697	-0.499685	0.0320151
NTG1	YAL015C	Endonuclease III homolog 1	P31378	26.3811	26.4889	26.5185	26.518	4.42591	26.3198	26.2435	26.3513	26.0334	37.2704	0.239588	0.0225786
NTH1	YDR001C	Neutral trehalase	P32356	30.9523	31.109	31.1589	31.0423	6.14142	30.9422	30.971	30.8698	30.9052	3.84009	0.143608	0.027948
NUC1	YJL208C	Mitochondrial nuclease	P08466	28.6483	28.3882	28.5045	28.7527	11.0473	28.5943	28.6811	28.8579	28.8776	6.48817	-0.179338	0.140175
NUD1	YOR373W	Protein NUD1	P32336	25.5876	25.2256	25.3231	25.3066	11.3409	25.5543	25.2407	25.7956	25.6006	10.4274	-0.187079	0.227666
NUF2	YOL069W	Kinetochore protein NUF2	P33895	25.5163	24.9086	24.8309	25.213	22.359	25.0385	25.358	25.2574	25.1525	2.04472	-0.0844003	0.638989
NUG1	YER006W	Nuclear GTP-binding protein NUG1	P40010	31.896	31.9035	31.9926	31.8295	4.67098	31.9245	32.055	32.0009	31.9512	8.2926	-0.0775047	0.129755
NUM1	YDR150W	Nuclear migration protein NUM1	Q00402	32.034	31.9813	32.091	32.0377	3.10405	31.9244	32.0452	32.0317	32.0443	6.58575	0.0245932	0.528471
NUP1	YOR098C	Nucleoporin NUP1	P20676	30.8197	31.0143	30.9267	31.065	7.37007	31.0811	31.0517	31.03	31.0431	5.11623	-0.0950355	0.134006
NUP100	YKL068W	Nucleoporin NUP100/NSP100	Q02629	29.075	29.3402	29.2701	29.2627	7.64646	29.2436	29.3572	29.3427	29.3007	3.46843	-0.0740354	0.278954
NUP116	YMR047C	Nucleoporin NUP116/NSP116	Q02630	29.6525	30.1545	30.2472	30.1721	17.1859	30.2093	30.1782	29.9863	29.8552	7.21578	-0.000680624	0.996738
NUP120	YKL057C	Nucleoporin NUP120	P35729	28.2938	28.4785	28.5041	28.4722	6.47968	28.3525	28.0411	28.2891	28.2071	11.5724	0.214691	0.0411834
NUP133	YKR082W	Nucleoporin NUP133	P36161	29.8706	29.6536	29.8915	29.8121	7.24985	29.6684	29.6878	29.7383	29.6846	7.49519	0.112197	0.0914037
NUP145	YGL092W	Nucleoporin NUP145;Nucleoporin NUP145N;Nucleoporin NUP145C	P49687	29.9376	29.8783	29.8067	29.8919	3.73454	29.8342	29.8451	29.7977	29.8385	2.7342	0.0497492	0.138484
NUP157	YER105C	Nucleoporin NUP157	P40064	29.5175	29.5453	29.6196	29.6008	3.29047	29.4621	29.5267	29.6287	29.4597	8.36054	0.0515327	0.307572
NUP159	YIL115C	Nucleoporin NUP159	P40477	30.6563	30.7648	30.5981	30.5917	5.65737	30.7015	30.6959	30.6688	30.6479	6.72673	-0.0258239	0.561075
NUP170	YBL079W	Nucleoporin NUP170	P38181	29.7544	29.9393	30.1081	29.8015	11.2413	29.9864	30.1967	29.8129	29.8838	2.94103	-0.0691216	0.570801
NUP188	YML103C	Nucleoporin NUP188	P52593	29.0947	28.8991	29.0259	29.0125	5.55607	28.9345	28.8799	28.9353	28.9577	5.43222	0.0812029	0.113068
NUP192	YJL039C	Nucleoporin NUP192	P47054	28.3417	28.1907	28.3846	28.3761	6.08672	28.2641	28.1776	28.2716	28.2978	17.2499	0.0704669	0.225317
NUP2	YLR335W	Nucleoporin NUP2	P32499	32.2086	32.3217	32.3501	32.3762	5.01841	32.4561	32.3411	32.4615	32.4522	4.47758	-0.113534	0.0517911
NUP42	YDR192C	Nucleoporin NUP42	P49686	25.7546	25.889	26.1182	26.1951	13.9311	26.2684	26.2356	26.0953	25.9424	10.3841	-0.146201	0.290206
NUP49	YGL172W	Nucleoporin NUP49/NSP49	Q02199	28.6199	28.4673	28.6855	28.7538	8.32053	28.4136	28.4175	28.4053	28.5192	5.67172	0.192703	0.0279761
NUP53	YMR153W	Nucleoporin NUP53	Q03790	28.6422	28.6674	28.7542	28.6416	3.75119	28.6598	28.7567	28.672	28.7975	10.9595	-0.0451499	0.330252
NUP57	YGR119C	Nucleoporin NUP57	P48837	29.694	29.5831	29.4586	29.7079	7.88278	29.702	29.9047	29.822	29.6747	5.53726	-0.164963	0.0814991
NUP60	YAR002W	Nucleoporin NUP60	P39705	30.4192	30.7045	30.7575	30.5677	10.3056	30.6583	30.8052	30.6472	30.476	8.72815	-0.0344083	0.745797
NUP82	YJL061W	Nucleoporin NUP82	P40368	29.1898	29.0069	29.1271	29.0827	5.31585	29.2062	29.1009	29.1311	28.9695	7.65233	-0.000317535	0.996117
NUP84	YDL116W	Nucleoporin NUP84	P52891	27.8563	28.086	28.0027	28.1524	8.69189	28.049	27.9668	28.4144	28.1857	2.95118	-0.129623	0.309679
NUP85	YJR042W	Nucleoporin NUP85	P46673	29.3733	28.6534	28.9737	29.0621	20.4406	29.0532	28.7175	28.7806	28.9161	42.0543	0.148803	0.404073
NUR1	YDL089W	Nuclear rim protein 1	Q12066	24.8102	25.3015	25.1114	25.1856	13.8989	25.6254	25.4139	25.3916	25.7135	11.0236	-0.43395	0.0163635
NUS1	YDL193W	Probable undecaprenyl pyrophosphate synthase	Q12063	28.8018	29.3616	29.2183	28.8538	19.0297	29.0991	29.2996	28.958	28.6135	9.57499	0.0663064	0.750463
NUT1	YGL151W	Mediator of RNA polymerase II transcription subunit 5	P53114	27.5799	27.2794	27.2496	27.3763	10.679	27.2968	27.1121	27.3186	27.6695	12.8972	0.0220606	0.87843
NVJ1	YHR195W	Nucleus-vacuole junction protein 1	P38881	25.7093	25.9825	25.9958	25.414	18.1506	25.7479	25.9503	25.931	25.5093	8.9669	-0.00922316	0.958829
NYV1	YLR093C	Vacuolar v-SNARE NYV1	Q12255	28.1265	28.4192	28.2734	28.189	8.9282	28.3011	28.3499	28.156	27.8145	15.1243	0.0966222	0.505414
OAC1	YKL120W	Mitochondrial oxaloacetate transport protein	P32332	31.1707	31.1449	31.2608	31.3669	7.06379	31.0306	30.8084	30.9572	31.1806	3.88054	0.24162	0.0397523
OAF1	YAL051W	Oleate-activated transcription factor 1	P39720	28.3707	30.0267	30.4175	27.9032	73.639	24.6168	28.2968	28.3221	28.8499	72.8578	1.6581	0.200756
OCA1	YNL099C	Putative tyrosine-protein phosphatase OCA1	P50946	28.4782	28.7946	28.4611	28.8366	13.8536	28.3899	28.1259	28.3869	28.657	3.11415	0.252686	0.137961
OCA2	YNL056W	Tyrosine-protein phosphatase-like protein OCA2	P53949		22.7611	23.2981	23.2671	19.5246			23.0041	23.5602	20.1189	-0.173387	0.610264
OCA4	YCR095C	Protein OCA4	P25366	26.2707	26.6302	25.9415	25.9879	22.9998	25.9831	26.2597	26.1642	25.9442	22.6704	0.119774	0.51987
OCA5	YHL029C	Oxidant-induced cell-cycle arrest protein 5	P38738	25.3342	24.5881	24.7914	24.7563	24.2368	25.0335	24.9628	24.7154	25.2563	14.7882	-0.124502	0.549525
OCA6	YDR067C	Putative tyrosine-protein phosphatase OCA6	Q12454	24.2423	24.0054	23.9725	24.3134	11.7757	24.8228	25.0561	24.8106	24.7735	41.0795	-0.732367	0.000466351
OCH1	YGL038C	Initiation-specific alpha-1,6-mannosyltransferase	P31755	27.4534	27.4181	27.5266	26.9796	15.8032	27.4243	27.5003	27.4402	27.6034	15.6659	-0.147631	0.300014
ODC1	YPL134C	Mitochondrial 2-oxodicarboxylate carrier 1	Q03028	26.6663	26.9566	26.9208	27.1305	12.994	26.6542	26.8708	26.8563	26.6164	8.34362	0.169134	0.19682
ODC2	YOR222W	Mitochondrial 2-oxodicarboxylate carrier 2	Q99297	30.1661	30.3151	30.4482	30.1399	10.0683	30.1894	30.2878	30.1162	30.2808	5.37205	0.0487523	0.575612
OKP1	YGR179C	Central kinetochore subunit OKP1	P53298	28.2172	27.5469	27.8899	28.0615	19.0584	25.3014	27.965	26.9985	27.9426	30.8152	0.877023	0.220749
OLA1	YBR025C	Obg-like ATPase 1	P38219	34.8875	34.7358	34.784	34.9586	6.98806	34.9612	34.8518	34.8589	35.0116	1.10106	-0.079345	0.259681
OLE1	YGL055W	Acyl-CoA desaturase 1	P21147	30.7232	30.3649	30.5459	30.5388	10.1463	30.487	30.387	30.4121	30.4875	1.74693	0.0998268	0.245578
OM14	YBR230C	Mitochondrial outer membrane protein OM14	P38325	27.421	27.8969	27.1322	27.1874	25.8837	28.4961	27.9414	27.9052	27.9565	19.5881	-0.66542	0.0249244
OM45	YIL136W	Mitochondrial outer membrane protein OM45	P16547	29.3156	29.3779	29.1728	29.1436	7.81537	29.1081	29.0717	28.9281	28.7687	10.8875	0.283301	0.0251523
OMA1	YKR087C	Mitochondrial metalloendopeptidase OMA1	P36163	26.3905	25.9708	25.8541	25.6557	22.5553	25.873	26.0842	25.8264	26.3979	9.97912	-0.0776106	0.714832
OMS1	YDR316W	Methyltransferase OMS1, mitochondrial	Q06668	25.734	26.5193	26.3276	26.2452	21.4568	26.2402	26.4028	26.2155	25.6992	15.3562	0.0670983	0.777153
OPI1	YHL020C	Transcriptional repressor OPI1	P21957	28.6725	28.4829	28.6901	28.6812	6.65729	28.6584	28.6394	28.6922	28.6777	8.99384	-0.0352487	0.515605
OPI10	YOL032W	Protein OPI10	Q08202	26.8148	26.3156	26.597	26.6718	14.0531	26.2754	26.6345	26.4436	26.7554	7.6253	0.0725915	0.643259
OPI3	YJR073C	Phosphatidyl-N-methylethanolamine N-methyltransferase	P05375	23.0008	22.3362	22.9384	23.7132	39.8844	22.5323	22.4086	22.8902	22.3404		0.454249	0.189781
OPT1	YJL212C	Oligopeptide transporter 1	P40897		27.4316	27.9237	26.8647	35.6766	27.1215	27.2994	27.0203	27.4018	22.5709	0.195895	0.508734
OPY1	YBR129C	Protein OPY1	P38271	25.4583	24.6594	24.4212	24.5922	35.9182	24.6855	25.2463	25.0505	24.7519	10.4509	-0.150771	0.590448
ORC1	YML065W	Origin recognition complex subunit 1	P54784	26.7549	26.5026	26.6345	26.7387	7.90148	26.699	26.4946	26.6598	26.6291	10.3843	0.0370703	0.630482
ORC4	YPR162C	Origin recognition complex subunit 4	P54791	26.2328	26.2197	26.5541	26.4426	11.4361	26.6761	26.4091	26.695	26.491	14.9669	-0.205512	0.105089
ORM1	YGR038W	Protein ORM1	P53224	27.4558	28.3758	28.2198	27.6742	29.5286	28.121	28.1316	27.894	27.5283	12.9814	0.0126869	0.962693
ORM2	YLR350W	Protein ORM2	Q06144	28.0613	28.127	28.2467	28.3491	8.9008	28.2287	28.0444	28.1792	28.1281	13.3736	0.0508956	0.522651
ORT1	YOR130C	Mitochondrial ornithine transporter 1	Q12375	25.9644	26.1988	26.2529	26.5008	15.294	26.2205	26.0654	26.0342	25.888	8.24718	0.177224	0.220035
OSH2	YDL019C	Oxysterol-binding protein homolog 2	Q12451	30.048	30.1481	30.1622	30.016	5.01468	30.0645	30.0607	30.0312	30.049	2.46034	0.0422436	0.297299
OSH3	YHR073W	Oxysterol-binding protein homolog 3	P38713	28.3055	28.5457	28.5025	28.4413	7.10846	28.5067	28.6158	28.6057	28.2595	3.61157	-0.0481837	0.640471
OSH6	YKR003W	Oxysterol-binding protein homolog 6	Q02201	29.921	30.1546	30.0914	29.978	7.35111	30.2066	30.3109	30.2369	30.2256	4.49077	-0.208784	0.0111457
OSH7	YHR001W	Oxysterol-binding protein homolog 7	P38755	29.8115	29.8978	29.8731	30.0651	7.69726	29.9383	29.9538	30.0243	29.9389	6.06017	-0.0519607	0.404379
OSM1	YJR051W	Fumarate reductase 2	P21375	29.8978	29.7666	29.8268	29.8998	4.39005	29.6684	29.9514	29.8718	29.9671	5.88049	-0.0169144	0.830662
OST1	YJL002C	Dolichyl-diphosphooligosaccharide--protein glycosyltransferase subunit 1	P41543	29.9998	29.8697	30.0506	30.0601	5.93518	29.8238	29.6479	29.7273	29.9874	11.0558	0.19846	0.0586844
OST2	YOR103C	Dolichyl-diphosphooligosaccharide--protein glycosyltransferase subunit OST2	P46964	28.3311	26.9946	27.9696	28.314	35.6818	27.1526	27.2365	27.2565	28.9881	62.4583	0.243918	0.669358
OST3	YOR085W	Dolichyl-diphosphooligosaccharide--protein glycosyltransferase subunit 3	P48439	28.4741	28.2982	28.4366	28.4886	5.87351	28.3557	28.0335	28.1948	28.6194	16.7655	0.123517	0.386322
OST5	YGL226C-A	Dolichyl-diphosphooligosaccharide--protein glycosyltransferase subunit OST5	Q92316	26.6694	26.7581	26.3368	26.5292	12.4462	26.4992	26.4249	26.5825	26.7768	13.0351	0.00253866	0.983686
OST6	YML019W	Dolichyl-diphosphooligosaccharide--protein glycosyltransferase subunit OST6	Q03723	26.0883	26.994	26.741	26.6757	24.3693	26.192	26.4605	26.3224	26.6126	9.50667	0.227895	0.323272
OSW5	YMR148W	Outer spore wall protein 5	P40219
OTU1	YFL044C	Ubiquitin thioesterase OTU1	P43558	26.1767	27.3246	26.9833	27.1706	30.3797	27.1698	27.2053	27.1907	26.7758	10.1422	-0.171581	0.556427
OTU2	YHL013C	OTU domain-containing protein 2	P38747	28.3084	28.1046	28.0587	28.2217	7.89137	28.1356	28.1931	28.2546	28.2323	11.6093	-0.0305406	0.64152
OXA1	YER154W	Mitochondrial inner membrane protein OXA1	P39952	28.8282	28.8133	28.9049	28.8572	2.81371	29.0103	28.7969	28.8072	28.8028	9.01276	-0.00339958	0.953402
OXP1	YKL215C	5-oxoprolinase	P28273	30.6096	30.6118	30.6881	30.5718	3.413	30.4134	30.4511	30.515	30.5781	1.44691	0.130925	0.0241293
OXR1	YPL196W	Oxidation resistance protein 1	Q08952	26.0848	26.5988	26.604	26.1206	19.7726	26.4123	26.3231	26.1466	26.2335	19.9278	0.0731783	0.653695
OYE2	YHR179W	NADPH dehydrogenase 2	Q03558	34.6932	34.7947	34.749	34.9238	6.92252	35.1202	35.0475	34.8395	34.9567	4.51084	-0.200811	0.0420335
PAA1	YDR071C	Polyamine N-acetyltransferase 1	Q12447	31.1234	31.0217	31.1832	31.2173	5.85965	31.9957	31.891	31.8698	31.6179	13.7558	-0.707213	0.000236903
PAB1	YER165W	Polyadenylate-binding protein, cytoplasmic and nuclear	P04147	35.2797	35.401	35.4421	35.4102	4.83791	35.4986	35.5473	35.4843	35.4261	6.26893	-0.105802	0.0509565
PAC10	YGR078C	Prefoldin subunit 3	P48363	26.8899	25.7714	26.3989	27.1942	39.6082	26.9144	26.8478	27.3467	26.8187	9.36121	-0.418311	0.257421
PAC11	YDR488C	WD repeat-containing protein PAC11	P40960	25.8236	25.5617	25.1648	24.9599	26.8742	26.463	25.4544		25.1661	18.6511	-0.316982	0.465336
PAC2	YER007W	Protein PAC2	P39937	27.8461	28.668	28.044	28.1135	26.3026	27.7895	28.3325	27.937	27.6193	24.8129	0.248306	0.327012
PAF1	YBR279W	RNA polymerase II-associated protein 1	P38351	29.7534	29.8625	30.008	29.7484	8.63305	30.0576	30.0458	30.0234	29.9982	4.6929	-0.188171	0.0234408
PAH1	YMR165C	Phosphatidic acid phosphohydrolase 1	P32567	27.1856	27.3113	27.5158	27.4463	10.0396	27.422	27.3126	27.2901	27.3608	13.0611	0.0183821	0.823477
PAL1	YDR348C	Protein PAL1	Q05518	29.6652	29.9445	30.1055	29.8357	12.7896	29.8073	29.8115	29.8917	29.6653	5.53822	0.0937879	0.401331
PAM1	YDR251W	Protein PAM1	P37304	29.8302	29.9513	29.9769	29.9935	5.01057	29.3989	29.3576	29.3105	29.3031	6.40667	0.595437	9.03867e-06
PAM16	YJL104W	Mitochondrial import inner membrane translocase subunit TIM16	P42949	28.272	28.5351	28.6213	28.6778	11.8898	29.0388	28.9324	29.0064	28.7545	12.6168	-0.40642	0.0101457
PAM17	YKR065C	Presequence translocated-associated motor subunit PAM17, mitochondrial	P36147	27.8471	28.2445	28.2491	28.0717	12.6567	28.5839	28.5498	28.5438	28.1714	7.38569	-0.359109	0.0383862
PAM18	YLR008C	Mitochondrial import inner membrane translocase subunit TIM14	Q07914	28.9957	28.6926	28.3627	28.7478	17.6597	29.0584	28.9758	28.9864	28.8627	27.3689	-0.27116	0.0939206
PAN1	YIR006C	Actin cytoskeleton-regulatory complex protein PAN1	P32521	31.3893	31.8014	31.7756	31.6335	12.5489	31.7449	31.8492	31.743	31.4749	6.3976	-0.0530533	0.68304
PAN2	YGL094C	PAB-dependent poly(A)-specific ribonuclease subunit PAN2	P53010	26.8395	26.4568	26.4847	26.56	12.7229	26.8451	26.5795	26.9869	27.0429	5.50845	-0.278329	0.0857695
PAN3	YKL025C	PAB-dependent poly(A)-specific ribonuclease subunit PAN3	P36102	27.125	27.6799	27.8817	27.678	20.6473	27.6816	27.6968	27.6287	27.7127	10.3013	-0.0887789	0.606882
PAN5	YHR063C	2-dehydropantoate 2-reductase	P38787	30.941	30.9384	31.116	30.8492	7.90363	30.9272	30.9586	31.0077	30.8661	2.97037	0.0212628	0.748113
PAN6	YIL145C	Pantoate--beta-alanine ligase	P40459	28.6255	28.153	28.3686	28.5878	14.6915	28.6369	28.0718	28.337	28.4561	3.37796	0.0582676	0.73028
PAP1	YKR002W	Poly(A) polymerase	P29468	29.5716	29.3497	29.4276	29.3615	7.23523	29.4391	29.4486	29.5574	29.6466	6.96874	-0.0953258	0.226976
PAP2	YOL115W	Poly(A) RNA polymerase protein 2	P53632	27.0003	26.7279	26.6901	26.5902	12.6344	26.7752	26.8876	26.8919	26.366	9.05483	0.0219452	0.890046
PAR32	YDL173W	Protein PAR32	Q12515	29.5884	29.685	29.723	29.7524	4.87762	29.94	29.8697	29.9174	29.6667	7.0786	-0.161258	0.0658869
PAT1	YCR077C	DNA topoisomerase 2-associated protein PAT1	P25644	30.4491	30.5555	30.4824	30.3791	5.08249	30.4845	30.4375	30.3416	30.3501	5.47674	0.0631029	0.257414
PBA1	YLR199C	Proteasome chaperone 1	Q05778	27.9453	27.672	27.4092	27.816	15.4381	27.9771	27.87	27.933	28.0313	10.741	-0.242244	0.0898803
PBI2	YNL015W	Protease B inhibitor 2	P0CT04	29.7597	29.3068	29.3397	29.7714	17.5811	30.0823	29.9836	30.1075	30.1148	9.9608	-0.527643	0.00699818
PBN1	YCL052C	Protein PBN1	P25580	27.0789	26.7124	26.8839	26.7248	12.2071	26.3859	26.6682	26.4844	26.7325	10.183	0.282264	0.0529737
PBP1	YGR178C	PAB1-binding protein 1	P53297	30.8538	30.9655	30.9875	30.8898	4.3458	31.1167	31.1471	30.9591	30.9479	6.0157	-0.118549	0.0986157
PBP2	YBR233W	PAB1-binding protein 2	P38151	27.2877	26.9181	26.7106	27.3166	19.8309	27.0522	26.9461	27.291	27.2863	16.3494	-0.0856616	0.633515
PBP4	YDL053C	Protein PBP4	Q07362	29.7542	30.1158	29.9787	29.7639	12.3229	29.9418	29.9883	29.8808	29.6771	12.9883	0.0311669	0.789074
PBS2	YJL128C	MAP kinase kinase PBS2	P08018	29.9765	30.1707	30.2291	30.0652	7.71913	30.0758	30.0384	30.1104	30.0258	5.79155	0.0477769	0.450566
PBY1	YBR094W	Probable tubulin--tyrosine ligase PBY1	P38254	28.1957	27.7449	28.0618	28.1745	13.5858	28.1544	27.8212	28.1243	28.1625	9.37958	-0.0213536	0.877139
PCC1	YKR095W-A	EKC/KEOPS complex subunit PCC1	Q3E833	25.4403	24.6273	23.9369	25.1605	41.402	25.7392	25.7489	26.0567	26.2304	38.4267	-1.15255	0.0169971
PCF11	YDR228C	Protein PCF11	P39081	27.2913	27.119	27.2359	27.3388	6.46161	26.7677	26.7833	26.7863	26.991	26.0007	0.414182	0.00113006
PCL6	YER059W	PHO85 cyclin-6	P40038	25.8704	26.0619	26.1877	25.9056	10.298	26.1498	26.2491	25.8908	26.0351	8.92604	-0.074803	0.508451
PCL8	YPL219W	PHO85 cyclin-8	Q08966	21.9792	21.873	22.1244	21.623	14.2762	21.9156		21.8242	22.34	15.0259	-0.126706	0.518528
PCM1	YEL058W	Phosphoacetylglucosamine mutase	P38628	31.5753	31.3118	31.4295	31.423	7.55537	31.2485	31.4056	31.4509	31.5306	6.76486	0.026006	0.756951
PCS60	YBR222C	Peroxisomal-coenzyme A synthetase	P38137	30.7497	30.6435	30.7778	30.6985	4.07962	30.82	30.756	30.7494	30.8716	5.07294	-0.0818893	0.0950038
PCT1	YGR202C	Choline-phosphate cytidylyltransferase	P13259	28.672	28.3235	28.4452	28.5004	10.1509	28.4819	28.4915	28.5148	28.5914	7.61831	-0.0346326	0.666731
PDA1	YER178W	Pyruvate dehydrogenase E1 component subunit alpha, mitochondrial	P16387	33.708	33.5212	33.5104	33.4406	8.14205	33.4913	33.584	33.5336	33.62	4.43881	-0.0121607	0.855047
PDB1	YBR221C	Pyruvate dehydrogenase E1 component subunit beta, mitochondrial	P32473	33.286	33.0221	33.2654	33.2685	8.34751	33.209	33.1838	33.3137	33.2836	3.88145	-0.0370172	0.61583
PDC1	YLR044C	Pyruvate decarboxylase isozyme 1	P06169	37.4215	37.5353	37.4205	37.5543	4.98538	37.5961	37.4674	37.5731	37.5242	6.30101	-0.0572828	0.258418
PDC2	YDR081C	Protein PDC2	P32896	27.4651	27.3075	27.3356	27.2608	6.17996	27.3754	27.1817	27.2387	27.4124	6.74909	0.0401729	0.587605
PDC5	YLR134W	Pyruvate decarboxylase isozyme 2	P16467	24.9585	23.7838	24.1896	21.9241	67.6925	23.7241	23.0208	23.4218	23.8363	184.78	0.213248	0.760968
PDC6	YGR087C	Pyruvate decarboxylase isozyme 3	P26263	24.2495	23.4531	24.3942	24.5219	28.5527	24.3359	23.6614	24.2933	24.2432	20.9511	0.0212492	0.943567
PDE1	YGL248W	3,5-cyclic-nucleotide phosphodiesterase 1	P22434	25.9747	24.8647	24.6662	25.8779	44.3116	25.7366	25.356	25.5738	26.3906	21.3463	-0.418352	0.341418
PDE2	YOR360C	3,5-cyclic-nucleotide phosphodiesterase 2	P06776	26.4623	26.0627	26.2026	26.3351	11.8669	25.8358	25.7794	25.8001	26.0194	9.92812	0.407026	0.00718412
PDH1	YPR002W	Probable 2-methylcitrate dehydratase	Q12428	26.0158	25.3532	25.6999	25.4026	22.0039	24.2502	25.3306	25.4292	25.749	11.8266	0.428067	0.279179
PDI1	YCL043C	Protein disulfide-isomerase	P17967	34.3207	34.1559	34.0878	34.1979	6.87255	34.195	34.1088	34.2926	34.2955	10.9098	-0.0323658	0.642573
PDR1	YGL013C	Transcription factor PDR1	P12383	27.7592	27.5843	27.7615	27.7108	5.63027	27.6391	27.696	27.6548	27.5534	6.94907	0.0681043	0.232212
PDR12	YPL058C	ATP-dependent permease PDR12	Q02785	28.9715	28.3161	28.8141	28.6974	18.3278	29.0961	28.9853	28.8639	29.2749	9.58191	-0.3553	0.074375
PDR15	YDR406W	ATP-dependent permease PDR15	Q04182	28.0696	28.5881	29.027	28.9111	27.2166	28.5119	28.5102	28.6221	28.1041	11.7643	0.211869	0.416305
PDR16	YNL231C	Phosphatidylinositol transfer protein PDR16	P53860	31.0247	30.5727	30.6329	30.9399	15.4261	30.7791	30.7235	30.8161	31.0015	12.7724	-0.0375022	0.777401
PDR17	YNL264C	Phosphatidylinositol transfer protein PDR17	P53844	28.3595	28.0243	27.8631	28.1469	14.6503	28.3106	27.7708	28.1038	28.4192	8.45398	-0.0526856	0.775903
PDR5	YOR153W	Pleiotropic ABC efflux transporter of multiple drugs	P33302	31.837	31.5587	31.4342	31.5453	12.3459	31.5658	31.4824	31.5645	31.6202	6.40862	0.0355676	0.707327
PDS1	YDR113C	Securin	P40316	25.5486	26.2272	25.8774	25.5218	23.9135	25.4979	25.9381	25.6145	25.7156	15.351	0.102234	0.610132
PDS5	YMR076C	Sister chromatid cohesion protein PDS5	Q04264	28.4771	28.4528	28.6781	28.6411	7.88589	28.6137	28.4606	28.3969	28.6777	7.1561	0.0250263	0.78234
PDX1	YGR193C	Pyruvate dehydrogenase complex protein X component, mitochondrial	P16451	31.0956	31.2015	31.2051	31.279	5.18765	31.2619	31.2788	31.3371	31.0821	9.13941	-0.0446419	0.528385
PDX3	YBR035C	Pyridoxamine 5-phosphate oxidase	P38075	32.0883	31.7577	31.8945	31.92	9.47518	31.91	32.0521	32.0031	32.1027	12.2623	-0.101868	0.246172
PEA2	YER149C	Protein PEA2	P40091	27.7387	27.4035	27.4943	27.7089	11.2258	27.4907	27.7044	27.7063	27.718	3.64468	-0.0685091	0.512336
PEF1	YGR058W	Peflin	P53238	25.8713	26.503	26.2914	25.5995	27.5961	26.2565	26.5263	25.9894	26.097	23.4004	-0.151011	0.543663
PEP1	YBL017C	Vacuolar protein sorting/targeting protein VPS10	P32319	32.4746	32.4513	32.3951	32.5975	6.011	32.5506	32.46	32.5361	32.5024	5.45153	-0.0326529	0.514888
PEP12	YOR036W	Syntaxin PEP12	P32854	23.9889	24.0361	24.1011	24.3699	12.3348	23.9115	23.9185	24.0768	23.7949	13.3883	0.198545	0.102009
PEP3	YLR148W	Vacuolar membrane protein PEP3	P27801	26.5051	26.3387	26.7032	26.2555	13.9781	26.3286	26.3839	26.1765	26.4437	8.75309	0.117454	0.343671
PEP4	YPL154C	Saccharopepsin	P07267	32.9964	32.8531	32.7058	32.944	8.64502	32.7721	32.6905	32.9143	32.8736	6.17698	0.0622098	0.472864
PEP5	YMR231W	Vacuolar membrane protein PEP5	P12868	27.9218	27.9138	27.654	27.8383	8.34312	27.7065	27.6385	27.8267	27.7961	9.52152	0.0899937	0.278818
PEP8	YJL053W	Carboxypeptidase Y-deficient protein 8	P40335	28.05	27.8683	28.0748	27.9616	6.42467	27.7272	27.9737	27.7036	27.6442	4.75997	0.226494	0.0396115
PET10	YKR046C	Protein PET10	P36139	29.0999	29.1326	29.1956	29.0747	3.65177	29.0538	29.0969	29.0292	29.0176	5.89803	0.0763273	0.0515665
PET100	YDR079W	Protein PET100, mitochondrial	P38958	23.6724					24.5735	22.9456	22.8652			0.210962
PET112	YBL080C	Glutamyl-tRNA(Gln) amidotransferase subunit B, mitochondrial	P33893	26.4695	26.1532	26.7384	26.5596	16.3951	27.1032	26.477	26.3111	26.614	14.4314	-0.14616	0.512502
PET123	YOR158W	37S ribosomal protein PET123, mitochondrial	P17558	29.3638	28.9314	29.2639	29.273	12.435	29.354	29.4835	29.348	29.3066	4.65043	-0.164999	0.15813
PET18	YCR020C	Protein PET18	P25362	22.1836	20.8522			60.9885	23.4359		23.1294		0.796328	-1.76479	0.122832
PET54	YGR222W	Protein PET54	P10834	25.789	25.3108	26.1033	25.7701	21.7558	26.1566	26.4196	26.1937	26.0681	40.4551	-0.466173	0.0408226
PET8	YNL003C	Putative mitochondrial carrier protein PET8	P38921	28.0242		24.6486	25.6185	116.073	27.4269	25.0872	27.398	27.7612	10.6741	-0.82124	0.493266
PET9	YBL030C	ADP,ATP carrier protein 2	P18239	33.5036	33.6444	33.6614	33.4862	6.35606	33.5714	33.6354	33.5084	33.3735	8.60143	0.0517318	0.501437
PEX1	YKL197C	Peroxisomal ATPase PEX1	P24004	27.9594	27.7537	27.4695	27.5725	15.1769	27.5519	27.4292	27.4285	27.7532	8.35729	0.148041	0.305217
PEX11	YOL147C	Peroxisomal membrane protein PMP27	Q12462	27.3926	27.4627	27.6655	27.4444	8.58577	26.9731	27.3526	26.9513	27.203	17.2384	0.371297	0.0169126
PEX13	YLR191W	Peroxisomal membrane protein PAS20	P80667	26.0124	26.2396	26.1589	26.1503	6.44095	26.2187	25.6492	26.1571	25.7148	11.2285	0.205338	0.232266
PEX14	YGL153W	Peroxisomal membrane protein PEX14	P53112	28.1226	27.7077	27.8481	28.4395	23.0017	28.3746	28.475	28.3063	28.3361	15.1422	-0.343519	0.083513
PEX17	YNL214W	Peroxisomal membrane protein PEX17	P40155	25.4739	25.2388	25.5619	25.2182	11.8986	25.8543	25.5703	25.5502	25.8471	17.8291	-0.332289	0.0323347
PEX19	YDL065C	Peroxisomal membrane protein import receptor PEX19	Q07418	30.3318	30.4704	30.4176	30.444	4.11095	30.6297	30.3987	30.4866	30.5751	7.31355	-0.106544	0.120739
PEX25	YPL112C	Peroxisomal membrane protein PEX25	Q02969	31.0433	30.7458	30.6372	30.8974	12.3551	30.645	30.5931	30.8759	30.8252	19.27	0.0960967	0.423818
PEX29	YDR479C	Peroxisomal membrane protein PEX29	Q03370	23.3087	25.953	25.4682	25.1222	57.4821	25.8583	25.3572	25.7366	23.5374	14.3486	-0.159301	0.846798
PEX3	YDR329C	Peroxisomal biogenesis factor 3	P28795	25.2523	25.3608	25.1486	25.46	9.31343	25.6205	25.3909	26.0448	25.6766	16.1742	-0.377762	0.046683
PEX30	YLR324W	Peroxisomal membrane protein PEX30	Q06169	28.6657	28.7733	29.0093	28.6798	11.4536	28.5887	28.519	28.4798	28.5117	7.38286	0.257211	0.0208097
PEX31	YGR004W	Peroxisomal membrane protein PEX31	P53203	24.942	24.7228	24.8128	24.798	6.39619	24.9165	24.96	24.9407	24.857	14.3786	-0.0996503	0.0971066
PEX5	YDR244W	Peroxisomal targeting signal receptor	P35056	27.7299	27.8394	27.6171	27.7491	6.29195	27.3433	27.0348	27.2351	27.1573	8.47732	0.541263	0.000489645
PEX7	YDR142C	Peroxisomal targeting signal 2 receptor	P39108	24.4055	24.5595	24.0535	24.3196	14.2858	24.6669	24.0829	24.8143	24.5405	11.9931	-0.191623	0.352708
PEX8	YGR077C	Peroxisomal biogenesis factor 8	P53248	28.5614	28.7236	28.8073	28.8345	8.29693	28.8912	28.7974	28.7273	29.0621	11.3587	-0.137788	0.197262
PFD1	YJL179W	Prefoldin subunit 1	P46988	27.2636	26.0897	27.854	28.2178	52.8018	28.5091	26.3894	28.5891	28.837	25.2527	-0.724881	0.361914
PFK1	YGR240C	ATP-dependent 6-phosphofructokinase subunit alpha	P16861	35.7469	35.67	35.6498	35.6847	2.93043	35.6496	35.6046	35.6549	35.6259	4.03391	0.054111	0.0644488
PFK2	YMR205C	ATP-dependent 6-phosphofructokinase subunit beta	P16862	35.2166	35.5141	35.4456	35.3716	8.67277	35.472	35.5083	35.3341	35.2441	2.99409	-0.00263385	0.977226
PFK26	YIL107C	6-phosphofructo-2-kinase 1	P40433	27.3637	27.3348	27.4988	27.3292	5.65102	27.2219	27.4158	27.2127	27.1902	7.066	0.121507	0.113982
PFS2	YNL317W	Polyadenylation factor subunit 2	P42841	26.6653	26.3464	26.3572	25.8809	21.4984	26.4441	26.3688	26.3611	26.0912	15.1663	-0.0038213	0.983686
PFY1	YOR122C	Profilin	P07274	30.7923	30.7923	30.7723	30.8362	1.88238	30.9053	30.9495	30.6879	30.9678	2.21135	-0.0793769	0.274346
PGA2	YNL149C	Processing of GAS1 and ALP protein 2	P53903	28.5814	28.3767	28.6085	28.7667	10.9641	28.4514	28.513	28.6031	28.7059	6.02841	0.015009	0.882571
PGA3	YML125C	Plasma membrane-associated coenzyme Q6 reductase PGA3	Q12746	30.8976	30.9265	30.8205	30.7168	6.40273	30.809	30.8182	30.6305	30.7342	5.37367	0.0923719	0.19841
PGC1	YPL206C	Phosphatidylglycerol phospholipase C	Q08959	28.2968	28.5715	28.5368	28.6286	9.70882	28.518	28.3882	28.4822	28.2059	3.62804	0.10983	0.318725
PGD1	YGL025C	Mediator of RNA polymerase II transcription subunit 3	P40356	26.2182	25.9991	26.248	26.6057	17.984	26.268	26.6291	25.9072	26.0527	28.1854	0.0535253	0.798883
PGI1	YBR196C	Glucose-6-phosphate isomerase	P12709	36.051	35.9994	35.976	36.0166	2.19288	36.0646	36.0704	36.0703	35.9862	4.37555	-0.0371191	0.202497
PGK1	YCR012W	Phosphoglycerate kinase	P00560	37.6629	37.7802	37.6538	37.8216	5.84227	37.9134	38.0433	37.9585	37.8881	4.54273	-0.221228	0.0064574
PGM1	YKL127W	Phosphoglucomutase-1	P33401	31.5262	31.4363	31.5589	31.535	3.66461	31.6129	31.5824	31.5769	31.5933	4.62839	-0.0772674	0.0328183
PGM2	YMR105C	Phosphoglucomutase-2	P37012	31.9806	31.9196	31.6498	31.7933	9.98501	31.6881	31.5961	31.7844	31.6247	13.0392	0.162525	0.102148
PGM3	PGM3	Phosphoglucomutase-3	Q03262	30.3812	30.3153	30.2781	30.4681	5.83275	30.4604	30.384	30.3685	30.5053	11.9724	-0.0688831	0.239128
PHA2	YNL316C	Putative prephenate dehydratase	P32452	29.3913	29.0309	29.2544	29.2045	10.2221	29.0907	28.9622	29.1947	29.0031	23.6703	0.157596	0.132409
PHB1	YGR132C	Prohibitin-1	P40961	30.81	30.4041	30.4724	30.7214	13.4651	30.7122	30.764	30.8249	30.9679	7.27391	-0.215284	0.102597
[truncated: 1,854 more rows]

## Sheet: mZRE vs vector LZ
Gene names	Systematic Name	Protein names	Uniprot ID	Log 2 LZ mZRE	Log 2 LZ mZRE	Log 2 LZ mZRE	Log 2 LZ mZRE	Log 2 LZ mZRE	CV (%) LZ mZRE	Log 2 LZ pRS315	Log 2LZ pRS315	Log 2 LZ pRS315	Log 2 LZ pRS315	Log 2 LZ pRS315	CV (%) LZ pRS315	Fold Change LZ mZRE	p-value LZ mZRE
OCT1	YKL134C	Mitochondrial intermediate peptidase	P35999	25.5743	25.5508	25.6783	25.94	25.3408	15.4824	25.8226	25.181	25.3625	25.8819	25.8819	21.5211	-0.00912956	0.960163
AAC1	YMR056C	ADP,ATP carrier protein 1	P04710	28.063	27.8783	28.5494	27.7917	28.0188	22.2451	27.4332	28.4397	27.6228	27.9113	28.0536	27.7115	0.168104	0.463958
AAH1	YNL141W	Adenine deaminase	P53909	29.0663	28.9987	29.213	29.0743	29.0082	6.088	28.9883	29.1785	28.9455	29.0528	28.9607	6.76289	0.046947	0.435705
AAP1	YHR047C	Alanine/arginine aminopeptidase	P37898	29.6852	29.5683	29.5909	29.7105	29.4673	6.70366	29.8145	29.5977	29.6475	29.5965	29.7881	7.35259	-0.0844206	0.224489
AAT1	YKL106W	Aspartate aminotransferase, mitochondrial	Q01802	25.7652	25.718	25.8885	25.6898	25.7541	5.39654	26.1103	26.0273	25.5376	25.9545	26.0873	14.7937	-0.180299	0.140958
AAT2	YLR027C	Aspartate aminotransferase, cytoplasmic	P23542	32.2144	32.1463	32.1351	32.2071	32.1039	3.31409	32.0259	31.932	32.1536	32.0363	32.2714	9.22389	0.0774949	0.249389
ABD1	YBR236C	mRNA cap guanine-N7 methyltransferase	P32783	27.2102	27.1044	27.4182	27.3734	27.1471	9.68988	27.7968	27.1369	27.2466	27.2272	27.4446	19.6018	-0.119787	0.394568
ABF1	YKL112W	ARS-binding factor 1	P14164	28.2368	28.225	28.2443	28.3118	28.1653	3.63152	28.0647	28.1111	28.312	28.206	28.3166	7.89398	0.0345805	0.55583
ABF2	YMR072W	ARS-binding factor 2, mitochondrial	Q02486	28.0273	28.0983	27.8076	28.1596	28.3248	12.9213	28.5889	28.2308	28.1884	27.8515	27.6909	24.5686	-0.0265848	0.885178
ABP1	YCR088W	Actin-binding protein	P15891	32.7601	32.8333	32.655	32.7719	32.7209	4.54954	32.864	32.4225	32.815	32.8211	32.8564	11.9167	-0.00754554	0.934447
ABP140	YOR239W	tRNA(Thr) (cytosine(32)-N(3))-methyltransferase	Q08641	28.3657	28.5131	28.589	28.4942	28.4356	5.80567	28.6199	28.4395	28.5466	28.4953	28.5814	4.89658	-0.0570714	0.279434
ABZ1	YNR033W	Aminodeoxychorismate synthase	P37254	24.889	24.7973	24.8934	24.6247	24.6801	8.34139	25.0082	24.5536	24.9675	24.585	25.087	16.8715	-0.0633303	0.625635
ABZ2	YMR289W	Aminodeoxychorismate lyase	Q03266	25.483	25.28	25.3667	25.7779	24.9099	21.5144	25.7415	25.0937	25.5059	25.3905	25.4205	15.9874	-0.0669399	0.712864
ACB1	YGR037C	Acyl-CoA-binding protein	P31787	23.8426	23.7466	24.3457	23.8398	23.7658	19.05	23.8187	25.5599	24.1214	23.5967	24.557	62.3785	-0.422649	0.279372
ACC1	YNR016C	Acetyl-CoA carboxylase;Biotin carboxylase	Q00955	33.9097	33.843	33.9265	33.8921	33.7038	6.05454	33.6376	33.8332	33.843	33.866	33.9138	7.06275	0.0362662	0.575868
ACE2	YLR131C	Metallothionein expression activator	P21192	24.4189	24.4435	23.7035	24.1284	24.2937	19.1526	24.128	23.2508	24.4859	24.1465	24.4663	29.1763	0.102105	0.707111
ACF2	YLR144C	Endo-1,3(4)-beta-glucanase 2	Q12168	26.641	26.6786	26.3192	26.6657	26.4412	10.7869	26.7203	25.8988	26.6096	26.5238	26.8215	21.9736	0.0343355	0.851202
ACF4	YJR083C	Assembly-complementing factor 4	P47129	26.1099	26.0139	26.0094	26.051	25.8665	6.10019	26.1833	25.3521	26.2095	26.049	26.181	21.4197	0.01517	0.930275
ACH1	YBL015W	Acetyl-CoA hydrolase	P32316	29.1548	29.0871	29.2851	29.2024	29.2205	5.11501	29.2924	29.0388	29.2056	29.1758	29.1549	6.3127	0.0165006	0.762373
ACK1	YDL203C	Activator of C kinase protein 1	Q07622	24.4685	24.5414	24.2519	24.5656	24.3767	8.72692	24.5486	24.4041	24.2051	24.415	24.8468	17.0756	-0.0430783	0.73023
ACO1	YLR304C	Aconitate hydratase, mitochondrial	P19414	31.9737	31.8371	31.7219	31.9164	31.7543	7.37305	31.717	31.7443	32.1115	31.8824	31.6472	13.3184	0.0201861	0.83686
ACO2	YJL200C	Homocitrate dehydratase, mitochondrial	P39533	28.4934	28.4464	28.3243	28.5008	28.2795	6.92305	28.3245	28.3491	28.5283	28.3523	28.5217	7.06469	-0.00630848	0.923752
ACP1	YKL192C	Acyl carrier protein, mitochondrial	P32463	26.0648	26.1857	25.6433	26.0033	25.8463	14.1252	25.9914	26.396	26.0388	25.7824	26.281	16.8081	-0.149212	0.329563
ACS2	YLR153C	Acetyl-coenzyme A synthetase 2	P52910	32.3732	32.3403	32.3393	32.4255	32.2616	4.12184	32.2999	32.2932	32.3187	32.2525	32.505	7.10301	0.0140873	0.791612
ACT1	YFL039C	Actin	P60010	34.1665	34.1638	34.2189	34.1422	34.1132	2.70439	34.1832	34.1113	34.0555	34.1393	34.239	4.84229	0.0152389	0.680767
ADA2	YDR448W	Transcriptional adapter 2	Q02336	26.1934	26.4477	26.29	26.3262	26.0448	10.3291	26.6103	26.052	26.2738	26.1377	26.3328	15.4407	-0.020912	0.862985
ADD37	YMR184W	Alpha1-proteinase inhibitor-degradation deficient protein 37	Q03233	25.1627	25.2091	25.2548	25.3357	25.2058	4.61885	25.2111	25.5795	25.3137	25.4898	24.9908	15.7638	-0.0833346	0.462905
ADD66	YKL206C	Proteasome assembly chaperone 2	P36040	25.5604	25.7541	25.5416	25.5189	25.4341	8.42155	25.5175	25.8423	25.4876	25.5615	25.5005	10.9245	-0.0200484	0.818819
ADE1	YAR015W	Phosphoribosylaminoimidazole-succinocarboxamide synthase	P27616	29.9615	29.8388	29.8877	30.0464	30.0153	5.96182	29.8711	29.622	29.9279	29.7876	29.8729	8.00805	0.133632	0.0775251
ADE12	YNL220W	Adenylosuccinate synthetase	P80210	30.9993	31.09	31.1174	31.0761	31.0217	3.38365	31.0702	31.0859	31.037	31.0261	31.1545	3.55633	-0.0138467	0.672204
ADE13	YLR359W	Adenylosuccinate lyase	Q05911	30.8706	30.7483	30.806	30.7947	30.6668	5.19969	30.7191	30.6524	30.7507	30.7144	30.8329	4.6002	0.0433732	0.361653
ADE16	YLR028C	Bifunctional purine biosynthesis protein ADE16;Phosphoribosylaminoimidazolecarboxamide formyltransferase;IMP cyclohydrolase	P54113	31.5732	31.5493	31.5288	31.4937	31.542	2.02267	31.5966	31.2655	31.4823	31.4483	31.5379	8.43893	0.0712564	0.251433
ADE17	YMR120C	Bifunctional purine biosynthesis protein ADE17;Phosphoribosylaminoimidazolecarboxamide formyltransferase;IMP cyclohydrolase	P38009	32.3509	32.3536	32.4513	32.3304	32.2423	5.16608	32.1925	32.4509	32.2575	32.3048	32.4776	8.5856	0.00901388	0.892284
ADE2	YOR128C	Phosphoribosylaminoimidazole carboxylase	P21264	30.3698	30.358	30.4429	30.4246	30.3487	2.94022	30.4305	30.2065	30.3542	30.3749	30.5086	7.61149	0.0138728	0.801332
ADE3	YGR204W	C-1-tetrahydrofolate synthase, cytoplasmic;Methylenetetrahydrofolate dehydrogenase;Methenyltetrahydrofolate cyclohydrolase;Formyltetrahydrofolate synthetase	P07245	33.4832	33.4273	33.373	33.4153	33.4343	2.74705	33.5703	33.4887	33.5533	33.5439	33.5088	2.31145	-0.106394	0.00177587
ADE4	YMR300C	Amidophosphoribosyltransferase	P04046	29.8361	29.8347	29.8351	29.8452	29.6695	5.043	29.5817	29.557	29.786	29.8165	29.9439	11.3662	0.0670909	0.430742
ADE5,7	YGL234W	Bifunctional purine biosynthetic protein ADE5,7;Phosphoribosylamine--glycine ligase;Phosphoribosylformylglycinamidine cyclo-ligase	P07244	32.4538	32.4508	32.5272	32.4101	32.3574	4.34138	32.458	32.3333	32.4342	32.3784	32.4822	4.17417	0.0226157	0.577548
ADE6	YGR061C	Phosphoribosylformylglycinamidine synthase	P38972	32.6737	32.606	32.6323	32.6283	32.4828	4.895	32.6094	32.6446	32.6117	32.5604	32.6739	2.94331	-0.0153881	0.692574
ADE8	YDR408C	Phosphoribosylglycinamide formyltransferase	P04161	27.0748	27.0133	27.2189	27.2285	27.0074	7.56687	27.1502	27.4951	27.1201	27.3943	27.1651	11.9752	-0.156366	0.11937
ADH1	YOL086C	Alcohol dehydrogenase 1	P00330	30.7742	30.4908	30.3066	30.4132	30.9762	19.7294	31.4602	31.0554	30.9738	31.1139	30.9879	14.8476	-0.52604	0.00861367
ADH3	YMR083W	Alcohol dehydrogenase 3, mitochondrial	P07246	27.7938	27.3118	27.375	27.5906	28.0194	20.8108	28.7736	27.9557	27.9187	27.9522	27.9805	29.7817	-0.498016	0.0456901
ADH4	YGL256W	Alcohol dehydrogenase 4	P10127	34.3376	34.563	34.3018	34.4106	34.2935	7.99049	33.9028	34.5533	34.2616	34.2725	34.4135	16.0449	0.100571	0.424008
ADH5	YBR145W	Alcohol dehydrogenase 5	P38113	24.8902	24.4504	24.7973	24.818	24.584	12.3497	25.4356	25.0942	25.0359	25.1923	24.8901	14.4924	-0.421653	0.00877994
ADH6	YMR318C	NADP-dependent alcohol dehydrogenase 6	Q04894	29.2679	29.3105	29.2239	29.1952	29.3257	3.83642	29.4127	29.6016	29.3841	29.3479	29.3944	7.19354	-0.163471	0.0125902
ADI1	YMR009W	1,2-dihydroxy-3-keto-5-methylthiopentene dioxygenase	Q03677	25.122	25.2386	24.9874	25.2185	25.1821	6.80624	25.3684	25.3742	25.4745	25.2144	25.3964	6.41989	-0.215854	0.00820858
ADK1	YDR226W	Adenylate kinase	P07170	32.635	32.6413	32.3808	32.6843	32.4064	9.78918	32.6611	32.4386	32.8151	32.6912	32.5491	9.87941	-0.0814597	0.395958
ADO1	YJR105W	Adenosine kinase	P47143	32.8995	32.8589	32.786	32.9338	32.9963	5.45707	32.8791	32.9312	32.9915	32.8227	33.1033	7.59405	-0.0506457	0.422201
ADP1	YCR011C	Probable ATP-dependent permease	P25371	27.5195	27.5095	27.6484	27.5403	27.7349	6.9135	27.8749	27.8602	27.5967	27.6734	27.4402	12.5325	-0.0985848	0.319943
ADR1	YDR216W	Regulatory protein ADR1	P07248	25.4341	25.5447	25.4271	25.3479	25.632	7.80502	25.9853	25.4546	25.6222	25.618	25.6795	14.0953	-0.194728	0.0876931
AFG1	YEL052W	Protein AFG1	P32317	26.832	26.6539	26.925	27.0154	26.642	11.4051	26.8653	26.7964	26.664	26.8311	26.7861	5.17804	0.0250945	0.765061
AFG2	YLR397C	ATPase family gene 2 protein	P32794	26.986	27.024	27.0554	27.1143	26.8258	7.32576	27.0923	26.8459	27.0358	27.0249	26.9829	6.27078	0.00471508	0.942983
AFG3	YER017C	Mitochondrial respiratory chain complexes assembly protein AFG3	P39925	26.7528	26.6487	26.5036	26.9397	26.5896	11.9611	26.9474	26.3667	26.8289	26.7893	26.7537	14.1302	-0.0503187	0.694609
AFT1	YGL071W	Iron-regulated transcriptional activator AFT1	P22149	24.7701	24.8209	24.825	24.8656	25.121	10.1375	24.8777	24.7351	24.9621	24.8207	25.0454	8.38111	-0.0076548	0.928102
AGE2	YIL044C	ADP-ribosylation factor GTPase-activating protein effector protein 2	P40529	27.4515	27.6492	27.5183	27.6413	27.5056	6.10403	27.5218	27.6432	27.6514	27.657	27.4621	6.10449	-0.033918	0.561967
AGP1	YCL025C	General amino acid permease AGP1	P25376	23.1705	22.7572	22.5988	23.0191	22.6581	17.3818	22.7833	23.0974	23.003	23.0571	23.3807	15.1401	-0.223591	0.162909
AGX1	YFL030W	Alanine--glyoxylate aminotransferase 1	P43567	22.1689	21.0829	22.5149	21.6542	21.9007	35.4092	22.4868	21.5825	22.6208	22.4878	21.9769	27.4445	-0.366644	0.273002
AHA1	YDR214W	Hsp90 co-chaperone AHA1	Q12449	29.4388	29.3722	29.5915	29.4853	29.479	5.5844	29.7871	29.8177	29.3678	29.6154	29.7753	12.2703	-0.199282	0.0604306
AHC1	YOR023C	Protein AHC1	Q12433	21.5695	22.2559	22.1403	22.2721	21.946	18.6089	22.0767	21.5803	21.8133	21.5393	22.356	24.7285	0.163664	0.441248
AHP1	YLR109W	Peroxiredoxin type-2	P38013	33.465	33.4931	33.5063	33.604	33.6204	4.86582	33.2842	34.0546	33.3606	33.4634	33.5926	23.053	-0.013311	0.926395
AIF1	YNR074C	Apoptosis-inducing factor 1	P52923	25.5961	25.4664	25.6431	25.867	25.8499	11.8485	26.2212	25.6535	25.8169	25.3544	25.4557	25.1074	-0.0158429	0.928432
AIM10	YER087W	Probable proline--tRNA ligase, mitochondrial	P39965	25.381	25.3725	25.4021	25.4243	25.2768	3.84679	25.6444	25.3717	25.5015	25.3724	25.4972	7.95018	-0.106097	0.0971522
AIM14	YGL160W	Probable metalloreductase AIM14	P53109	25.1132	25.0247	25.2391	25.1954	24.8752	9.82541	25.0266	24.5308	25.3866	24.8765	25.2924	22.6819	0.0669591	0.697692
AIM17	YHL021C	Probable oxidoreductase AIM17	P23180	28.5778	28.4829	28.4103	28.5433	28.888	13.4671	28.9086	28.8451	28.4956	28.7152	28.6994	10.7741	-0.152335	0.198075
AIM18	YHR198C	Altered inheritance of mitochondria protein 18, mitochondrial	P38884	25.6491	25.7943	25.8421	25.8217	25.5826	7.84102	25.9238	25.4027	25.6666	25.6724	25.6388	12.8488	0.0771188	0.45106
AIM19	YIL087C	Altered inheritance of mitochondria protein 19, mitochondrial	P40502	25.6441	24.9149	25.2725	25.5874	25.2769	19.5611	25.679	24.614	25.0997	25.3897	25.2953	25.7608	0.123598	0.589944
AIM2	YAL049C	Protein AIM2	P39721	26.0878	25.829	26.0504	25.9356	26.1362	8.45212	26.0106	26.2214	25.8991	26.1573	25.6947	14.1948	0.0111969	0.920947
AIM21	YIR003W	Altered inheritance of mitochondria protein 21	P40563	27.6818	27.7391	27.633	27.7305	27.6872	2.94421	28.0563	27.4103	27.8028	27.7328	27.9129	16.0241	-0.0887051	0.442101
AIM23	YJL131C	Altered inheritance of mitochondria protein 23, mitochondrial	P47015	23.8374	24.0657	24.0049	24.0007	24.3779	14.4124	24.4868	23.9992	24.0203	24.0743	24.0928	15.0757	-0.0773719	0.556497
AIM24	YJR080C	Altered inheritance of mitochondria protein 24, mitochondrial	P47127	27.5126	27.2214	27.5118	27.3619	27.3558	8.41591	27.4359	27.5283	27.3564	27.3984	27.3959	4.59892	-0.030285	0.639095
AIM25	YJR100C	Altered inheritance rate of mitochondria protein 25	P47140	22.8497	23.1799	23.2959	23.5385	22.9116	19.8613	23.4543	22.9075	23.1989	22.9507	23.3731	16.8205	-0.021768	0.899672
AIM29	YKR074W	Altered inheritance rate of mitochondria protein 29	P36154	26.4637	26.3015	26.2175	26.253	25.7333	17.375	25.5876	26.323	26.1873	26.1189	25.9545	18.3025	0.159539	0.391487
AIM3	YBR108W	Altered inheritance of mitochondria protein 3	P38266	27.0834	27.2867	27.2044	27.2384	27.2143	5.11629	27.3522	26.8696	27.4539	27.2859	27.4865	15.7186	-0.0841686	0.48844
AIM34	YMR003W	Altered inheritance of mitochondria protein 34, mitochondrial	Q03673	23.5608	24.091	24.24	23.912	23.7799	18.1055	24.1272	23.8588	24.1009	24.0713	23.427	18.3604	-0.000313944	0.998627
AIM36	YMR157C	Altered inheritance of mitochondria protein 36, mitochondrial	Q03798	25.2875	25.295	25.5062	25.3176	25.3016	6.69366	25.6116	25.8857	25.5121	25.3136	25.5536	14.6699	-0.233745	0.0498018
AIM39	YOL053W	Altered inheritance of mitochondria protein 39, mitochondrial	Q08223	23.2032	23.0277	22.8309	23.064		10.489	22.7379	22.9813	22.4964	22.9276	22.9915	13.8261	0.20453	0.150005
AIM41	YOR215C	Altered inheritance of mitochondria protein 41, mitochondrial	Q12032	25.2275	25.3252	25.0147	25.2957	25.3495	8.94272	25.5813	24.8848	25.3397	24.9788	25.1993	19.7248	0.0457345	0.750567
AIM43	YPL099C	Altered inheritance of mitochondria protein 43, mitochondrial	Q02888	24.4261	24.3487	24.3806	24.5482	24.4566	5.40612	24.3745	24.4682	24.4902	24.5185	24.4401	3.77362	-0.0262697	0.552076
AIM45	YPR004C	Probable electron transfer flavoprotein subunit alpha, mitochondrial	Q12480	30.1768	30.2171	30.1046	30.0652	30.1875	4.33262	29.9657	30.3089	30.1908	30.123	30.1961	8.57248	-0.00665935	0.918418
AIM46	YHR199C	Altered inheritance of mitochondria protein 46, mitochondrial	P38885	28.1978	28.2626	28.2604	28.331	28.3611	4.45957	28.5927	27.9586	28.4007	28.4386	28.5723	16.2083	-0.11002	0.379239
AIM6	YDL237W	Altered inheritance of mitochondria protein 6	Q07716	28.3563	28.2042	28.2645	28.3901	28.2526	5.36797	28.3931	28.226	28.2065	28.2533	28.2675	5.20031	0.0242832	0.623234
AIM7	YDR063W	Protein AIM7	Q12156	26.7182	26.6195	26.919	26.7974	26.7024	7.95996	26.5599	25.6944	26.6796	26.5011	26.3909	23.1023	0.386114	0.0657535
AIM9	YER080W	Altered inheritance of mitochondria protein 9, mitochondrial	P40053	30.2458	30.2506	30.193	30.2509	30.2452	1.70054	30.4584	30.0727	30.3114	30.2065	30.3305	9.91995	-0.0387939	0.570713
AIP1	YMR092C	Actin-interacting protein 1	P46680	30.5412	30.5152	30.4376	30.5578	30.6324	4.8828	30.563	30.6978	30.512	30.4822	30.6474	6.32536	-0.0436554	0.420335
AIR1	YIL079C	Protein AIR1	P40507	24.6299	24.7606	24.3307	24.621	24.4779	11.1934	24.3541	24.101	24.7457	24.6971	24.6606	17.9609	0.0522835	0.725372
AIR2	YDL175C	Protein AIR2	Q12476	25.2399	25.0866	25.1111	25.2204	25.0643	5.6024	25.233	24.8561	25.3733	25.0561	25.3223	14.1327	-0.0236919	0.821189
AKL1	YBR059C	Serine/threonine-protein kinase AKL1	P38080	28.8699	28.8441	28.7491	28.8327	28.7241	4.37581	28.9911	28.4592	29.0025	28.8403	29.1921	17.8343	-0.0930658	0.481609
AKR1	YDR264C	Palmitoyltransferase AKR1	P39010	28.8709	28.8569	28.9585	28.9909	29.0465	5.57319	28.8691	29.1156	28.8121	28.8545	28.7662	9.87647	0.0612277	0.410811
ALA1	YOR335C	Alanine--tRNA ligase, mitochondrial	P40825-2;P40825	33.1276	33.1703	33.1559	33.1047	33.0796	2.55369	33.0863	33.0835	33.197	33.1707	33.1467	3.50714	-0.00924341	0.749992
ALB1	YJL122W	Ribosome biogenesis protein ALB1	P47019	23.7503	23.9384	23.5212	24.1664	23.6607	17.8959	23.3105	23.7337	23.9387	23.5438	23.7274	15.9514	0.156585	0.339619
ALD2	YMR170C	Aldehyde dehydrogenase [NAD(P)+] 1	P47771	28.2766	28.2338	28.3855	28.3104	28.4378	5.74652	28.4582	28.148	28.2667	28.3433	28.3063	7.82155	0.0243334	0.707402
ALD3	YMR169C	Aldehyde dehydrogenase [NAD(P)+] 2	P54114	29.9043	29.6423	29.8319	29.8367	30.9068	41.9559	30.7396	29.8997	29.6525	29.8496	29.9735	33.3438	0.00139351	0.996314
ALD4	YOR374W	Potassium-activated aldehyde dehydrogenase, mitochondrial	P46367	32.5615	32.4667	32.2815	32.5083	32.6541	9.34551	32.3415	32.5072	32.5224	32.511	32.5041	5.10008	0.017204	0.813477
ALD5	YER073W	Aldehyde dehydrogenase 5, mitochondrial	P40047	30.2735	30.201	30.3356	30.2598	30.2021	3.91296	30.1673	30.3594	30.3505	30.4398	30.3321	6.73942	-0.0753991	0.178853
ALD6	YPL061W	Magnesium-activated aldehyde dehydrogenase, cytosolic	P54115	33.7663	33.7423	33.8345	33.7692	33.8669	3.65748	33.6617	33.739	33.6564	33.7873	33.6789	3.96944	0.0911836	0.0296576
ALE1	YOR175C	Lysophospholipid acyltransferase	Q08548	27.3156	27.2322	27.256	27.4083	27.1888	5.9797	26.8168	27.1093	27.2902	27.2881	27.3792	14.5498	0.103477	0.362134
ALF1	YNL148C	Tubulin-specific chaperone B	P53904	24.8971	24.83	24.815	24.5319	24.8178	9.28069	24.9403	24.4797	24.7917	25.1722	24.6955	18.1753	-0.0375115	0.78423
ALG1	YBR110W	Chitobiosyldiphosphodolichol beta-mannosyltransferase	P16661	25.636	25.74	25.7805	25.5923	25.8121	6.48113	26.1992	26.0296	25.2881	25.6449	25.7483	23.8005	-0.0698515	0.680544
ALG11	YNL048W	GDP-Man:Man(3)GlcNAc(2)-PP-Dol alpha-1,2-mannosyltransferase	P53954	25.0277	24.8795	25.2804	24.8711	25.3916	16.6553	25.442	25.2473	24.79	25.0041	24.6745	22.1803	0.0584933	0.749215
ALG13	YGL047W	UDP-N-acetylglucosamine transferase subunit ALG13	P53178	25.3993	25.7455	25.9408	25.7762	25.4551	15.6971	24.4778	25.1375	25.8445	25.6065	25.0077	35.5543	0.448585	0.122685
ALG2	YGL065C	Alpha-1,3/1,6-mannosyltransferase ALG2	P43636	27.7264	27.6104	27.8638	27.7966	27.5755	8.43579	28.22	27.6588	27.7828	27.7412	28.0006	16.4425	-0.16613	0.18848
ALG3	YBL082C	Dol-P-Man:Man(5)GlcNAc(2)-PP-Dol alpha-1,3-mannosyltransferase	P38179	21.4217	21.9936	22.3714	21.4191	21.2611	34.8018	21.9839	21.1547	21.6189	21.3708	21.743	22.0961	0.11911	0.653006
ALG5	YPL227C	Dolichyl-phosphate beta-glucosyltransferase	P40350	24.7227	24.1808	23.0696	24.4222	24.6834	36.5163	24.2511	24.5926	24.3192	24.673	23.9676	19.1193	-0.145001	0.670216
ALG6	YOR002W	Dolichyl pyrophosphate Man9GlcNAc2 alpha-1,3-glucosyltransferase	Q12001	21.9291	21.3676	22.582	21.5717	22.1366	33.9818	22.6881	22.5468	21.6974	21.7353	21.789	34.7447	-0.173953	0.582921
ALG9	YNL219C	Alpha-1,2-mannosyltransferase ALG9	P53868	28.0589	27.8388	27.9938	28.0826	27.9385	6.7055	27.9855	27.6016	27.7817	27.7511	27.8855	9.97952	0.181472	0.0489172
ALK1	YGL021W	Serine/threonine-protein kinase Haspin homolog ALK1	P43633	24.3231	24.4364	24.3304	24.8285	24.2976	16.7483	24.6592	24.3332	24.6244	24.2169	24.6474	13.7832	-0.0530263	0.705787
ALO1	YML086C	D-arabinono-1,4-lactone oxidase	P54783	29.8432	29.7247	29.9033	29.94	29.8306	5.62891	29.7264	29.7572	29.7896	29.7043	29.855	4.13116	0.0818821	0.108062
ALR1	YOL130W	Magnesium transporter ALR1	Q08269	24.7792	24.9288	24.8071	24.6859	24.6706	7.34079	24.682	24.4289	24.8957	24.7836	25.1279	17.8333	-0.00933355	0.942159
ALT1	YLR089C	Probable alanine aminotransferase, mitochondrial	P52893	29.2391	29.2264	29.02	29.2017	29.1844	5.93887	29.2324	29.0595	29.2949	29.2665	29.2085	6.16072	-0.0380164	0.523923
ALT2	YDR111C	Probable alanine aminotransferase	P52892	25.266	25.7367	25.0453	25.3557	25.1372	19.7628	24.9952	25.1319	25.4143	25.4825	24.9375	17.1775	0.115867	0.495614
ALY1	YKR021W	Arrestin-related trafficking adapter 6	P36117	24.2833	24.2843	24.3311	24.5358	24.1806	9.38957	24.2324	23.6378	24.8254	24.4062	24.8583	31.5131	-0.0690085	0.772882
ALY2	YJL084C	Arrestin-related trafficking adapter 3	P47029	25.5083	25.6263	25.565	25.7012	25.5957	4.99457	25.8457	25.4181	25.6826	25.7838	25.7607	10.9426	-0.0988533	0.258735
AMD1	YML035C	AMP deaminase	P15274	28.8918	28.767	28.8409	28.88	28.8292	3.38805	28.8741	28.9338	28.8843	28.7957	28.9554	4.25641	-0.0468928	0.222155
AML1	YGR001C	N(6)-adenine-specific DNA methyltransferase-like 1	P53200	28.7232	28.6089	28.8912	28.5999	28.4946	10.7186	28.8963	28.6746	28.6037	28.7598	28.9696	10.557	-0.117247	0.255198
AMS1	YGL156W	Alpha-mannosidase	P22855	29.3304	29.107	29.1123	29.2943	29.4481	10.217	29.525	29.0468	29.1809	29.1868	29.2778	12.8001	0.0149619	0.888307
ANB1	YJR047C	Eukaryotic translation initiation factor 5A-2	P19211	25.1176	25.4791	25.2517	25.3063	24.9717	13.284	24.8015	24.1848	25.4493	25.015	24.2505	37.2182	0.485051	0.0912724
ANP1	YEL036C	Mannan polymerase II complex ANP1 subunit	P32629	26.5792	26.7275	26.8419	26.9033	26.8872	9.08429	26.9535	27.3471	26.9447	26.8313	26.8699	15.4755	-0.201475	0.105501
ANR2	YKL047W	Uncharacterized protein ANR2	P36090	25.3686	25.2673	25.7164	25.2474	25.2606	14.8517	25.564	25.4251	25.29	25.2969	25.6119	10.3195	-0.0655514	0.570524
ANT1	YPR128C	Peroxisomal adenine nucleotide transporter 1	Q06497	24.9219	24.4625	25.326	24.9416	25.0079	20.674	25.02	25.0594	24.6654	24.8167	24.8443	11.038	0.0508515	0.752322
AOS1	YPR180W	DNA damage tolerance protein RHC31	Q06624	28.0952	27.8291	27.9874	27.8343	27.8796	8.10437	27.9797	28.2411	27.9695	27.8595	28.0711	10.1193	-0.0990469	0.260317
APA1	YCL050C	Protein APA1;5,5-P-1,P-4-tetraphosphate phosphorylase;ADP-sulfurylase	P16550	31.9333	31.8847	31.8804	31.9138	31.8965	1.52294	31.9531	31.6617	31.9517	31.8532	31.8727	7.94423	0.0432625	0.446858
APA2	YDR530C	5,5-P-1,P-4-tetraphosphate phosphorylase 2	P22108	25.6932	25.6715	25.6331	25.7437	25.589	4.07347	26.093	25.5917	25.6807	25.4215	25.8442	18.1642	-0.0600874	0.622391
APC4	YDR118W	Anaphase-promoting complex subunit 4	Q04601	23.1915	23.2568	23.0921	23.0202	23.4283	11.1321	21.9539	22.9365	23.1728	23.0806	22.9203	27.5356	0.385006	0.133822
APD1	YBR151W	Actin patches distal protein 1	P38281	29.203	29.2152	29.153	29.3298	29.1345	5.39781	29.6515	29.0307	29.418	29.3178	29.4778	15.3566	-0.172054	0.150317
APE2	YKL157W	Aminopeptidase 2, mitochondrial	P32454	31.8029	31.6814	31.7854	31.7729	31.8594	4.42694	31.9351	31.7878	31.6773	31.7948	31.8862	6.85211	-0.0358259	0.518291
APE3	YBR286W	Aminopeptidase Y	P37302	31.6809	31.6299	31.6609	31.7284	31.7714	3.90343	31.6339	31.5146	31.5728	31.5732	31.662	4.00335	0.103	0.0211248
APE4	YHR113W	Aspartyl aminopeptidase 4	P38821	29.2164	29.082	29.1645	29.0775	29.2272	4.93466	29.2778	28.9082	29.0609	29.1719	29.2891	10.7874	0.0119239	0.882731
APL1	YJR005W	AP-2 complex subunit beta	P27351	25.2595	24.9445	25.2322	25.0848	24.9969	9.68398	25.2795	25.5439	24.8446	25.0942	24.9786	19.5413	-0.0445895	0.753234
APL2	YKL135C	AP-1 complex subunit beta-1	P36000	26.699	26.8067	26.6029	26.8509	26.712	6.71927	27.1203	26.4267	26.9087	26.7566	26.9658	17.2515	-0.101322	0.442572
APL3	YBL037W	AP-2 complex subunit alpha	P38065	27.9303	26.9797	27.9491	27.2761	27.7742	27.5862	24.9864	27.9155	26.8994	27.8389	27.6638	53.5834	0.521039	0.396909
APL4	YPR029C	AP-1 complex subunit gamma-1	Q12028	28.1112	28.122	28.212	28.2203	28.1252	3.71605	28.1912	28.2539	27.9409	27.9878	28.3541	12.1073	0.012536	0.882684
APL5	YPL195W	AP-3 complex subunit delta	Q08951	27.6778	27.8473	27.9295	27.8388	27.77	6.47604	27.798	27.844	27.8251	27.6878	27.7841	4.12155	0.0248819	0.632791
APL6	YGR261C	AP-3 complex subunit beta	P46682	27.5858	27.6115	27.6407	27.6603	27.6197	1.9676	27.7898	27.4536	27.6077	27.6759	27.8146	9.94282	-0.0447168	0.522008
APM1	YPL259C	AP-1 complex subunit mu-1-I	Q00776	26.7252	26.8615	26.5926	26.7614	26.3981	11.996	26.7362	26.2464	26.7948	26.5733	26.9686	17.975	0.00390236	0.979316
APM3	YBR288C	AP-3 complex subunit mu	P38153	27.611	27.7187	27.735	27.7135	27.5011	6.71131	27.6231	27.2738	27.6897	27.5758	27.8914	15.0928	0.04512	0.690856
APM4	YOL062C	AP-2 complex subunit mu	Q99186	25.5331	25.6042	25.7773	25.3287	25.3225	13.5279	25.8627	25.7819	25.6219	25.631	25.6954	7.22467	-0.205397	0.0688418
APN1	YKL114C	DNA-(apurinic or apyrimidinic site) lyase 1	P22936	26.6579	26.5922	26.5918	26.702	26.5983	3.47367	26.9295	26.1809	26.6861	26.7069	26.9525	19.5968	-0.0627407	0.667349
APP1	YNL094W	Phosphatidate phosphatase APP1	P53933		21.6143		22.4836	21.959	30.8729	22.175		21.9572	22.8478	22.3047	28.1068	-0.302216	0.371954
APS3	YJL024C	AP-3 complex subunit sigma	P47064	25.9805	26.0818	25.5633	26.0154	26.0541	13.4687	26.41	26.8601	26.0047	25.9771	26.3451	26.2816	-0.380358	0.076456
APT1	YML022W	Adenine phosphoribosyltransferase 1	P49435	28.8155	28.9638	28.9766	28.8599	28.8381	5.18321	28.6434	29.237	28.8696	28.7876	28.9165	15.9113	-2.5333e-05	0.999811
APT2	YDR441C	Adenine phosphoribosyltransferase 2	P36973	23.4151	23.3095	23.928	23.2503	23.4112	20.6011	23.8085	23.5554	23.3438	23.6288	23.7254	11.9849	-0.149555	0.330573
ARA1	YBR149W	D-arabinose dehydrogenase [NAD(P)+] heavy chain	P38115	31.6678	31.6633	31.5289	31.6511	31.6193	3.90709	31.6344	31.4861	31.6593	31.4664	31.6337	6.29426	0.0500729	0.331978
ARA2	YMR041C	D-arabinose 1-dehydrogenase	Q04212	25.6953	25.9881	25.7608	26.1023	25.6983	13.1803	25.6355	25.5426	25.564	25.4704	26.0773	18.3582	0.191014	0.19855
ARB1	YER036C	ABC transporter ATP-binding protein ARB1	P40024	31.5289	31.583	31.4883	31.5208	31.4801	2.84751	31.3409	31.4041	31.431	31.5516	31.5493	6.42921	0.0648535	0.190213
ARC1	YGL105W	tRNA-aminoacylation cofactor ARC1	P46672	32.153	32.3017	32.0564	32.0933	32.1733	6.64032	32.0136	32.2438	32.2332	32.1112	32.0245	7.65409	0.0303097	0.652334
ARC15	YIL062C	Actin-related protein 2/3 complex subunit 5	P40518	27.7361	27.5202	27.2565	27.7094	27.441	13.488	28.0499	27.8567	27.7723	27.6791	28.2092	15.1804	-0.380789	0.0194793
ARC18	YLR370C	Actin-related protein 2/3 complex subunit 3	Q05933	29.1031	28.6907	28.5424	29.0884	28.8157	16.9193	29.1791	28.2282	28.7689	28.9535	29.1043	23.4804	0.00127109	0.995142
ARC19	YKL013C	Actin-related protein 2/3 complex subunit 4	P33204	28.3158	28.4282	28.3114	28.1305	28.224	7.69912	27.7152	28.2549	28.2606	28.3216	28.1883	15.3399	0.133852	0.300812
ARC35	YNR035C	Actin-related protein 2/3 complex subunit 2	P53731	29.3322	29.3061	29.2723	29.2686	29.2872	1.83104	29.5168	29.0966	29.3244	29.2851	29.5271	12.182	-0.0566843	0.503587
ARC40	YBR234C	Actin-related protein 2/3 complex subunit 1	P38328	28.9409	28.7369	29.0911	28.9617	29.0206	8.9079	28.8609	29.0093	28.6701	28.7604	28.9707	9.73751	0.0959599	0.30136
ARD1	YHR013C	N-terminal acetyltransferase A complex catalytic subunit ARD1	P07347	27.4169	27.3889	27.5856	27.5761	27.3216	8.18249	27.5295	27.4332	27.3718	27.4172	27.4226	4.07285	0.022957	0.705529
ARE1	YCR048W	Sterol O-acyltransferase 1	P25628	24.6771	24.8006	24.3308	24.6537	24.6022	11.5151	24.4585	23.1368	24.632	24.6313	24.7067	33.5656	0.299816	0.357198
ARE2	YNR019W	Sterol O-acyltransferase 2	P53629	26.1358	26.2956	26.4454	26.2443	26.6251	13.5096	26.6952	26.2341	26.2893	26.1997	25.9057	20.3451	0.084461	0.594696
ARF1	YDL192W	ADP-ribosylation factor 1	P11076	31.453	31.3334	31.8981	31.3572	31.3082	18.7289	31.5727	31.8905	31.2901	31.4189	31.4592	16.6366	-0.0562998	0.716506
ARF2	YDL137W	ADP-ribosylation factor 2	P19146	25.4631	25.5035	25.8548	25.1793	26.0705	24.4902	25.2481	27.6547	25.6508	25.3144	25.9699	88.5917	-0.353319	0.471962
ARF3	YOR094W	ADP-ribosylation factor 3	P40994	22.8346	22.5445	22.9645	23.122	23.0737	15.1451	23.1047	23.5631	22.5558	23.0845	23.1658	24.1066	-0.186931	0.356229
ARG1	YOL058W	Argininosuccinate synthase	P22768	33.0898	33.1935	32.904	33.102	32.9359	8.38684	32.8238	33.251	33.3223	33.2396	33.0547	13.2812	-0.0932394	0.401729
ARG2	YJL071W	Amino-acid acetyltransferase, mitochondrial	P40360	24.3322	24.3939	24.3265	24.4074	24.177	6.17071	24.1886	24.3019	24.3654	24.2336	24.5598	10.3995	-0.002446	0.975335
ARG3	YJL088W	Ornithine carbamoyltransferase	P05150	29.5991	29.4579	30.0377	29.6458	29.4929	17.3226	29.3642	29.848	29.4661	29.5229	29.6305	13.216	0.0803532	0.560817
ARG4	YHR018C	Argininosuccinate lyase	P04076	31.4707	31.415	31.4558	31.5154	31.3771	3.66778	31.6593	31.7482	31.5924	31.6102	31.8536	7.65575	-0.245923	0.00185001
ARG5,6	YER069W	Protein ARG5,6, mitochondrial;N-acetyl-gamma-glutamyl-phosphate reductase;Acetylglutamate kinase	Q01217	32.6843	32.632	32.6897	32.7002	32.5355	4.63308	32.7196	32.8037	32.5725	32.6691	32.8767	8.14987	-0.0799796	0.225686
ARG7	YMR062C	Arginine biosynthesis bifunctional protein ArgJ, mitochondrial;Glutamate N-acetyltransferase;Amino-acid acetyltransferase;Arginine biosynthesis bifunctional protein ArgJ alpha chain;Arginine biosynthesis bifunctional protein ArgJ beta chain	Q04728	31.0431	31.0137	30.8858	30.9289	30.9332	4.5343	30.8928	30.8391	31.1287	31.1125	31.0224	8.88844	-0.0381478	0.572531
ARG8	YOL140W	Acetylornithine aminotransferase, mitochondrial	P18544	31.0034	31.0166	31.0268	30.9919	30.9705	1.51801	30.9041	31.3175	31.0113	31.0137	31.1943	11.6572	-0.0863118	0.28027
ARG82	YDR173C	Inositol polyphosphate multikinase	P07250	23.6287	23.6532	23.1723	23.5757	23.222	15.6471	23.7967		23.6435	23.6992	23.564	6.8073	-0.225494	0.116558
ARH1	YDR376W	Probable NADPH:adrenodoxin oxidoreductase, mitochondrial	P48360	27.5304	27.4724	27.704	27.6387	27.635	6.39257	27.6556	27.7003	27.5627	27.5192	27.6542	5.13698	-0.0222802	0.687219
ARI1	YGL157W	NADPH-dependent aldehyde reductase ARI1	P53111	29.6847	29.7236	29.9482	29.7874	29.7517	7.2786	29.7848	29.9933	29.5471	29.7699	29.9262	11.62	-0.0251437	0.785576
ARK1	YNL020C	Actin-regulating kinase 1	P53974	23.4029	23.7016	23.5413	23.635	23.1661	14.1152	23.6331	23.0343	23.6814	23.3358	23.891	22.0414	-0.0257529	0.887962
ARL1	YBR164C	ADP-ribosylation factor-like protein 1	P38116	27.1835	27.1637	27.3735	27.1676	27.3086	6.75245	27.2871	27.8303	27.073	27.4662	27.3135	20.5273	-0.154642	0.278176
ARL3	YPL051W	ADP-ribosylation factor-like protein 3	Q02804	23.0453	22.7746	23.2436	23.1824	22.6044	18.2339	23.8944	23.2985	22.3544	23.1521	23.2757	35.9526	-0.224951	0.437004
ARN2	YHL047C	Siderophore iron transporter ARN2	P38724	24.6964	24.8404	25.392	24.7697	24.545	24.7489	25.0323	24.5354	25.006	24.6537	25.2553	20.1171	-0.0478221	0.81304
ARO1	YDR127W	Pentafunctional AROM polypeptide;3-dehydroquinate synthase;3-phosphoshikimate 1-carboxyvinyltransferase;Shikimate kinase;3-dehydroquinate dehydratase;Shikimate dehydrogenase	P08566	32.9666	32.8467	32.9785	32.9137	32.8261	4.74914	32.8551	32.9798	32.886	32.9313	32.9827	3.89992	-0.0206556	0.617585
ARO10	YDR380W	Transaminated amino acid decarboxylase	Q06408	28.539	28.492	28.7474	28.5016	28.3442	10.2611	28.0041	28.1801	28.2376	28.3531	28.3822	10.237	0.293402	0.0140463
ARO2	YGL148W	Chorismate synthase	P28777	31.2336	31.2388	31.3609	31.2911	31.1904	4.57978	31.3438	31.4875	31.2639	31.3035	31.3415	6.00203	-0.0850916	0.112783
ARO3	YDR035W	Phospho-2-dehydro-3-deoxyheptonate aldolase, phenylalanine-inhibited	P14843	30.9236	30.8711	30.9141	30.9528	30.8802	2.30786	31.126	30.9601	31.1341	31.0152	31.1792	6.26222	-0.174541	0.00388025
ARO4	YBR249C	Phospho-2-dehydro-3-deoxyheptonate aldolase, tyrosine-inhibited	P32449	31.97	31.9582	32.1043	31.8826	32.0806	6.36957	31.9277	32.6912	31.9696	32.1089	32.1763	23.4059	-0.175584	0.253859
ARO7	YPR060C	Chorismate mutase	P32178	29.0665	29.0847	28.9059	29.129	28.8622	8.06056	29.0154	28.7694	29.061	28.9434	29.104	8.79274	0.0309828	0.704825
ARO8	YGL202W	Aromatic/aminoadipate aminotransferase 1	P53090	32.8127	32.8409	32.5821	32.8032	32.7664	6.88613	32.8433	32.417	32.874	32.8748	32.8704	12.6647	-0.0148288	0.887058
ARO9	YHR137W	Aromatic amino acid aminotransferase 2	P38840	30.0367	29.9094	30.1487	29.9971	29.8237	8.59146	29.6727	29.8731	29.7041	29.8385	29.9397	7.82972	0.177483	0.045814
ARP2	YDL029W	Actin-related protein 2	P32381	30.8473	30.7844	30.8552	30.8542	30.8779	2.4074	30.9363	30.7036	30.7649	30.7999	30.8747	6.36038	0.0279622	0.541058
ARP3	YJR065C	Actin-related protein 3	P47117	30.691	30.6947	30.6419	30.6364	30.6876	1.9783	30.61	30.6881	30.6139	30.6714	30.8219	6.10486	-0.0107528	0.797375
ARP4	YJL081C	Actin-related protein 4	P80428	27.8371	27.7309	27.7909	27.7884	27.6438	5.06805	28.0224	27.8947	27.6943	27.7225	28.0433	11.213	-0.117245	0.181515
ARP5	YNL059C	Actin-related protein 5	P53946	27.6111	27.733	28.0601	27.4675	27.6441	16.189	27.6485	27.8362	27.8618	27.9842	27.6754	9.67514	-0.0980413	0.426009
ARP6	YLR085C	Actin-like protein ARP6	Q12509	23.2747	23.497	23.2608	23.2947	23.1961	8.18466	23.1973	22.6902	23.3094	23.178	23.3996	17.2988	0.149785	0.29271
ARP7	YPR034W	Actin-related protein 7	Q12406	27.0717	26.7127	27.3105	27.0567	26.9143	15.2157	27.1298	27.0747	26.6599	26.8825	27.0654	12.7171	0.0507454	0.708468
ARP8	YOR141C	Actin-like protein ARP8	Q12386	27.0098	27.2922	27.2151	27.2892	27.2375	7.69848	27.4481	27.0982	27.3918	27.1861	27.2899	9.89364	-0.074052	0.396349
ARP9	YMR033W	Actin-like protein ARP9	Q05123	28.0011	27.8915	27.9753	27.9197	27.9379	3.0297	28.0895	28.0583	27.9213	27.8906	28.0312	6.0037	-0.0531392	0.258359
ART5	YGR068C	Arrestin-related trafficking adapter 5	P53244	24.818	24.8962	24.8558	24.9943	24.8411	4.90907	25.2985	24.5057	24.9444	24.9316	25.1837	19.9717	-0.0917097	0.530051
ARX1	YDR101C	Probable metalloprotease ARX1	Q03862	29.7784	29.6676	29.8793	29.7892	29.7178	5.56466	29.6696	29.573	29.6985	29.7277	29.7972	5.65724	0.0732771	0.190809
ASC1	YMR116C	Guanine nucleotide-binding protein subunit beta-like protein	P38011	33.07	33.0551	33.2214	33.0738	33.1793	5.27484	32.9355	33.446	32.8988	33.0876	33.1283	15.8368	0.0206817	0.845414
ASF1	YJL115W	Histone chaperone ASF1	P32447	28.1854	28.1825	27.9465	28.223	28.0605	7.7342	28.1958	27.58	28.1992	28.0438	28.183	16.4579	0.079245	0.556784
ASG1	YIL130W	Activator of stress genes 1	P40467	26.3313	26.4244	26.4152	26.631	26.3887	8.19585	26.7567	26.0471	26.5823	26.4813	26.6599	17.4615	-0.0673532	0.62698
ASG7	YJL170C	Protein ASG7	P46993	22.4074	22.0568	22.3966	21.6329	22.3188	20.5653	22.6441	20.4579	22.392	22.0885	21.6231	46.9908	0.321359	0.458237
ASH1	YKL185W	Transcriptional regulatory protein ASH1	P34233	25.3399	25.2244	24.9933	25.4116	24.7356	18.2077	25.6389	24.9879	25.2386	25.1693	25.5298	18.5716	-0.17193	0.346495
ASI2	YNL159C	Protein ASI2	P53895	24.4636	24.3104	23.8246	24.5926	23.9647	21.9941	24.6597	24.6051	24.7275	24.3295	24.5404	10.165	-0.341253	0.067191
ASI3	YNL008C	Protein ASI3	P53983	24.3592	23.8113	23.6849	23.9745	23.8389	19.3134	24.1212	23.1659	24.222	24.0407	24.2244	25.2992	-0.0210724	0.929651
ASK1	YKL052C	DASH complex subunit ASK1	P35734	25.5238	25.6027	25.3388	25.5484	25.1801	11.7287	25.7239	24.7904	25.661	25.4602	25.7129	23.2583	-0.0309024	0.876755
ASK10	YGR097W	Activator of SKN7 protein 10	P48361	27.0527	27.2005	26.9113	27.1426	27.2405	8.87892	27.4014	26.8294	27.275	27.0101	27.3901	16.7261	-0.0716765	0.588213
ASM4	YDL088C	Nucleoporin ASM4	Q05166	26.5642	26.7083	26.7081	27.0302	26.564	13.965	26.6732	26.2731	27.0129	26.6355	26.9067	19.0056	0.0147199	0.926078
ASN1	YPR145W	Asparagine synthetase [glutamine-hydrolyzing] 1	P49089	31.935	31.8835	31.9748	31.9051	31.8511	3.29981	31.9521	32.201	31.9908	32.0051	31.9769	7.23839	-0.115303	0.0485213
ASN2	YGR124W	Asparagine synthetase [glutamine-hydrolyzing] 2	P49090	31.93	31.9751	32.0799	31.9582	31.9105	4.6617	31.8471	32.0373	31.9509	31.9955	31.8708	5.5902	0.0304082	0.532542
ASP1	YDR321W	L-asparaginase 1	P38986	29.7122	29.8755	29.5639	29.5621	29.5928	9.66937	29.6529	29.5109	29.6448	29.5524	29.7012	5.38504	0.0488668	0.502692
AST1	YBL069W	Protein AST1	P35183	26.7586	26.6196	27.08	26.7914	26.6656	13.1366	27.0743	26.3949	26.7882	27.015	26.9595	17.3779	-0.0633282	0.677115
AST2	YER101C	Protein AST2	P39945	26.4105	26.6039	26.5367	26.3899	26.6577	8.11824	26.644	26.4319	26.6722	26.7497	26.3556	11.4438	-0.0509416	0.594035
ATE1	YGL017W	Arginyl-tRNA--protein transferase 1	P16639	24.2417	24.5109	24.662	24.727	24.5514	12.3947	24.9215	25.1332	24.1531	24.3512	24.459	28.9877	-0.0650124	0.754786
ATF2	YGR177C	Alcohol O-acetyltransferase 2	P53296	25.1931	25.3115	25.7299	25.0388	24.9612	22.5031	24.8409	25.1995	24.5912	25.2851	25.5511	25.4668	0.153359	0.499135
ATG1	YGL180W	Serine/threonine-protein kinase ATG1	P53104	23.3412	23.2031	23.5077	23.1809	23.4264	9.77616	23.7497	22.9537	23.4068	23.3468	23.8197	23.1223	-0.123471	0.483354
ATG13	YPR185W	Autophagy-related protein 13	Q06628	25.5177	25.87	25.4805	25.6831	25.4917	12.091	25.8502	25.0424	25.8397	25.7146	25.8865	20.9748	-0.0580713	0.74926
ATG15	YCR068W	Putative lipase ATG15	P25641	23.0105	22.9708	23.8225	22.4791	23.2287	35.4026	23.3444	23.0158	23.2318	23.0905	23.4241	11.7396	-0.118982	0.619991
ATG17	YLR423C	Autophagy-related protein 17	Q06410	24.0114	24.0928	23.9505	23.9408	23.4298	16.2723	24.0632	24.4288	23.9659	23.4349	23.7539	25.5495	-0.0442837	0.832128
ATG18	YFR021W	Autophagy-related protein 18	P43601	25.726	25.9043	25.6857	25.6602	25.7146	6.92404	25.9573	25.4068	25.7278	25.8403	26.0094	15.592	-0.0501691	0.675293
ATG19	YOL082W	Autophagy-related protein 19	P35193	25.4383	25.4147	25.8213	25.7017	25.7689	12.9041	25.7675	25.7586	25.9787	25.7355	25.7287	7.58376	-0.164812	0.127484
ATG2	YNL242W	Autophagy-related protein 2	P53855	25.2909	25.4609	25.6594	25.2263	25.3001	12.612	25.6212	25.0479	25.426	25.4499	25.4552	13.7703	-0.0125365	0.921182
ATG20	YDL113C	Autophagy-related protein 20	Q07528	24.726	24.6557	24.6717	24.8169	24.0972	17.4962	24.792	24.2201	24.4562	24.7773	24.7138	16.2272	0.00163058	0.992528
ATG21	YPL100W	Autophagy-related protein 21	Q02887	26.3799	26.3305	26.3323	26.1698	26.4593	7.19812	26.9508	26.0692	26.4969	26.3403	26.4658	23.1565	-0.130271	0.412422
ATG22	YCL038C	Autophagy-related protein 22	P25568	22.1486	22.2306	23.2075	21.7991	22.6063	40.1683	23.2233	22.7335	22.2129	22.6135	22.4443	27.7877	-0.247053	0.423719
ATG23	YLR431C	Autophagy-related protein 23	Q06671	22.7437	23.0891	22.2033	22.9375	22.3768	25.051	23.1506	22.2745	23.0887	22.7043	22.3192	28.1512	-0.0373724	0.884235
ATG26	YLR189C	Sterol 3-beta-glucosyltransferase	Q06321	25.6453	25.2594	25.5506	25.6482	25.6806	11.2153	25.7343	25.4514	25.3725	25.2905	25.6792	13.4951	0.0512767	0.670293
ATG27	YJL178C	Autophagy-related protein 27	P46989	27.2403	27.1762	27.4303	27.2648	27.1512	7.81865	27.2411	26.8646	27.3148	27.1712	27.3571	12.6859	0.0627999	0.547877
ATG3	YNR007C	Autophagy-related protein 3	P40344	25.2532	25.7254	25.3592	25.1835	25.4964	15.4477	25.3334	24.9897	25.5313	25.4791	25.5855	15.3735	0.0197142	0.894478
ATG33	YLR356W	Autophagy-related protein 33	Q06485	28.3653	28.569	28.1439	28.267	28.3614	10.9541	28.2384	27.9653	28.533	28.5197	28.6831	18.7476	-0.0466072	0.757034
ATG34	YOL083W	Autophagy-related protein 34	Q12292	23.8378	23.9745	24.1416	25.309	23.737	54.7924	23.8468	23.5606	25.432	23.7344	23.9257	67.7096	0.100093	0.826869
ATG38	YLR211C	Autophagy-related protein 38	Q05789	23.9983	23.5368	24.1953	23.6459	23.9526	18.4199	24.4947	24.4194	24.0779	23.9207	24.3609	16.2927	-0.388917	0.0437668
ATG4	YNL223W	Cysteine protease ATG4	P53867	25.4304	25.0531	25.0532	25.4371	25.2948	13.1028	25.2403	24.8714	25.4292	25.2399	24.9119	16.3707	0.115175	0.424618
ATG7	YHR171W	Ubiquitin-like modifier-activating enzyme ATG7	P38862	25.372	25.2367	25.3172	25.4775	25.3424	6.11957	25.5515	24.9945	25.4774	25.3077	25.1637	15.4737	0.0502272	0.657038
ATM1	YMR301C	Iron-sulfur clusters transporter ATM1, mitochondrial	P40416	26.0575	25.8704	26.328	26.3078	26.0411	13.3963	25.9142	26.0848	25.8945	26.2605	26.2406	11.9673	0.0420235	0.727553
ATP1	YBL099W	ATP synthase subunit alpha, mitochondrial	P07251	33.7511	33.7427	33.6929	33.7282	33.656	2.71314	33.7822	33.5733	33.7841	33.7366	33.6574	6.17224	0.00748091	0.869756
ATP10	YLR393W	Mitochondrial ATPase complex subunit ATP10	P18496	25.3496	25.5414	25.5519	25.5326	25.092	12.9112	25.6917	25.3292	25.3894	25.4852	25.6302	10.7273	-0.0916233	0.438254
ATP11	YNL315C	Protein ATP11, mitochondrial	P32453	26.3612	26.3586	26.3544	26.3271	26.1194	6.88563	26.6858	26.0804	26.2991	26.4032	26.5472	15.8343	-0.0989847	0.409762
ATP12	YJL180C	Protein ATP12, mitochondrial	P22135	26.4113	26.4025	26.6237	26.2021	26.1239	13.7439	26.6339	26.7369	26.4434	26.4106	26.5224	9.53189	-0.19674	0.102553
ATP14	YLR295C	ATP synthase subunit H, mitochondrial	Q12349	27.2165	27.6508	27.1573	27.3448	27.1948	14.931	27.1145	27.5016	27.5545	27.1676	27.421	13.5205	-0.0389866	0.766225
ATP15	YPL271W	ATP synthase subunit epsilon, mitochondrial	P21306	25.3471	25.57	25.0915	25.5077	25.3799	12.3336	25.3037	26.1034	25.5837	25.4407	25.6542	22.5705	-0.237878	0.172764
ATP16	YDL004W	ATP synthase subunit delta, mitochondrial	Q12165	29.9319	30.364	29.7874	30.0487	29.932	15.8984	29.2739	29.9967	30.1157	29.9991	29.7277	21.1331	0.190166	0.320886
ATP17	YDR377W	ATP synthase subunit f, mitochondrial	Q06405	28.267	28.166	28.6068	27.7754	28.5257	21.6133	29.0527	28.5169	28.5084	28.6052	27.383	35.7027	-0.145088	0.655471
ATP2	YJR121W	ATP synthase subunit beta, mitochondrial	P00830	34.0014	34.0935	33.9226	34.0274	33.8703	6.07218	33.9795	33.9204	33.9446	33.9589	34.0881	4.60886	0.00473363	0.925238
ATP20	YPR020W	ATP synthase subunit g, mitochondrial	Q12233	26.4958	25.9268	26.2488	26.5369	26.2697	16.1682	26.6109	27.336	26.2988	26.5476	26.6223	30.2394	-0.387499	0.0950559
ATP23	YNR020C	Mitochondrial inner membrane protease ATP23	P53722	21.6932	22.2333	22.0205	21.923	21.8495	14.1765	22.8631	22.9816	22.1665	22.1766	22.7659	25.7049	-0.646829	0.0109473
ATP25	YMR098C	ATPase synthesis protein 25, mitochondrial	Q03153	24.3243	24.2334	24.6559	24.5739	24.2881	13.2436	25.1432	24.5702	24.3991	24.417	24.473	24.274	-0.185356	0.286347
ATP3	YBR039W	ATP synthase subunit gamma, mitochondrial	P38077	31.4505	31.4451	31.3911	31.5667	31.3277	6.17225	31.5	31.3363	31.6318	31.4814	31.6249	8.27666	-0.0786784	0.274915
ATP4	YPL078C	ATP synthase subunit 4, mitochondrial	P05626	31.0139	30.9341	31.0013	30.8171	30.8367	6.28077	30.7814	30.8397	30.8678	31.036	31.0414	8.274	0.00731086	0.915658
ATP5	YDR298C	ATP synthase subunit 5, mitochondrial	P09457	30.4751	30.2214	30.2426	30.3744	30.2898	7.3713	30.1905	30.5801	30.3353	30.2724	30.2276	11.2583	-0.000528433	0.9951
ATP7	YKL016C	ATP synthase subunit d, mitochondrial	P30902	29.0182	28.8834	28.7572	29.0108	28.9839	7.47242	29.1955	29.1184	28.8454	28.9001	28.7063	13.953	-0.0224423	0.832376
ATX1	YNL259C	Metal homeostasis factor ATX1	P38636	24.0752	24.4195	24.3624	24.1458	24.3018	9.96301	24.0872	24.2864	24.3989	24.4937	24.338	10.2343	-0.0598852	0.542103
AUR1	YKL004W	Inositol phosphorylceramide synthase catalytic subunit AUR1	P36107					25.3747			23.2643	23.1352			6.32333	2.17502	#DIV/0!
AVL9	YLR114C	Late secretory pathway protein AVL9	Q12500	27.4875	27.4144	27.2891	27.4744	27.4276	5.32213	27.4082	27.0272	27.2321	27.3173	27.5633	13.6829	0.109	0.289436
AVO1	YOL078W	Target of rapamycin complex 2 subunit AVO1	Q08236	22.9831	22.6829	23.0163	23.3853	22.9534	17.9435	23.3013	22.7115	23.0383	22.959	23.8111	31.3029	-0.160019	0.484191
AVT1	YJR001W	Vacuolar amino acid transporter 1	P47082	27.3259	27.4339	27.1124	27.3222	27.2392	8.17538	27.4342	26.8264	27.4013	27.2837	27.3988	15.7907	0.0178321	0.890498
AVT3	YKL146W	Vacuolar amino acid transporter 3	P36062	24.8804	24.7423	24.4639	24.6677	24.2576	16.4421	24.911	23.8479	25.0065	24.7742	25.6795	42.6389	-0.241421	0.463341
AVT7	YIL088C	Vacuolar amino acid transporter 7	P40501	23.1635	23.1558	23.5437	23.2233	23.2522	11.7477	23.1821	23.7234	23.0053	23.0266	23.3814	21.9284	0.00395919	0.979736
AXL1	YPR122W	Putative protease AXL1	P40851	24.9668	24.6012	24.9314	24.7505	24.6005	12.1615	24.9477	25.0558	24.5507	24.5132	25.1663	20.0703	-0.0766524	0.633089
AXL2	YIL140W	Axial budding pattern protein 2	P38928	24.7369	24.5603	24.1542	24.4603	24.4074	14.5872	24.1943	24.1522	24.6649	24.5574	24.4836	15.4314	0.0533582	0.711632
AYR1	YIL124W	NADPH-dependent 1-acyldihydroxyacetone phosphate reductase	P40471	29.3759	29.4921	29.2932	29.3857	29.5029	6.05488	29.1865	29.731	29.3883	29.4186	29.3196	14.5925	0.00119311	0.990595
AZF1	YOR113W	Asparagine-rich zinc finger protein AZF1	P41696	24.7282	24.7452	24.0992	24.9009	24.2375	23.1717	24.7903	23.8464	24.4026	24.6167	24.6597	22.7992	0.0790353	0.738653
BAP2	YBR068C	Leu/Val/Ile amino-acid permease	P38084	24.9342	25.2175	24.6209	24.8408	24.6968	16.8254	25.1219	24.1598	25.1135	24.9237	25.2463	25.3353	-0.0510273	0.82345
BAP3	YDR046C	Valine amino-acid permease	P41815	25.6052	22.7405	23.4028	26.2971	23.6559	99.6811	24.5569	25.9122	23.9207	27.001	24.789	91.1151	-0.895655	0.335781
BAR1	YIL015W	Barrierpepsin	P12630	28.129	28.1565	28.0761	28.1239	27.823	8.92993	28.2002	27.3903	28.1794	28.0335	28.1761	20.5049	0.0658181	0.701979
BAS1	YKR099W	Myb-like DNA-binding protein BAS1	P22035	23.0878	23.3582	23.6488	23.3006	23.1239	16.1962	23.3572	23.4282	23.3508	23.2108	23.3689	5.42701	-0.0393168	0.721486
BAT1	YHR208W	Branched-chain-amino-acid aminotransferase, mitochondrial	P38891	32.8811	32.8999	32.8892	32.8214	32.8486	2.23154	32.8558	32.9073	32.9735	32.9163	33.0548	5.32107	-0.0734703	0.0815448
BAT2	YJR148W	Branched-chain-amino-acid aminotransferase, cytosolic	P47176	30.1973	30.0287	30.003	30.0999	29.9777	6.26088	30.1354	30.3058	30.131	30.0552	30.107	6.74714	-0.0855604	0.177829
BBC1	YJL020C	Myosin tail region-interacting protein MTI1	P47068	31.2559	31.2878	31.1279	31.1817	31.1826	4.44924	31.2694	31.2306	31.3288	31.2772	31.3145	2.6887	-0.0769281	0.0508159
BCD1	YHR040W	Box C/D snoRNA protein 1	P38772	22.5466	22.6918	22.6192	22.4297	22.6916	7.50642	22.969	22.9513	22.3427	22.4539	22.6357	19.6363	-0.0747281	0.598925
BCH1	YMR237W	Protein BCH1	Q05029	28.352	28.472	28.2775	28.4325	28.2502	6.65052	28.5671	28.1513	28.4056	28.397	28.4737	10.3131	-0.0420855	0.618414
BCH2	YKR027W	Protein BCH2	P36122	26.4894	26.757	26.1499	26.6745	26.5399	15.2985	27.1433	25.9534	26.9458	26.529	26.6115	29.4572	-0.114449	0.630824
BCK1	YJL095W	Serine/threonine-protein kinase BCK1/SLK1/SSP31	Q01389	26.3499	26.6551	26.3665	26.451	26.3023	10.0813	26.4552	25.8864	27.0318	26.1905	26.6337	30.4234	-0.0145515	0.944956
BCK2	YER167W	Protein BCK2	P33306	22.4731	22.5511	23.0117	22.983	22.179	24.2124	22.5249	22.2807	22.6696	22.5897		11.1912	0.123347	0.546169
BCP1	YDR361C	Protein BCP1	Q06338	28.4711	28.5683	28.4105	28.2433	28.4599	8.07857	27.8016	29.2808	28.0927	28.2654	28.5048	43.6734	0.0415837	0.875134
BCS1	YDR375C	Mitochondrial chaperone BCS1	P32839	24.2289	24.1484	24.1488	24.2947	24.1188	5.08557	24.5235	24.1686	24.0211	23.9078	24.3074	17.0668	0.00222917	0.984719
BCY1	YIL033C	cAMP-dependent protein kinase regulatory subunit	P07278	30.184	30.2049	30.2191	30.3198	30.245	3.69624	30.2555	29.9053	30.243	30.2054	30.1945	9.43204	0.0738298	0.315782
BDF1	YLR399C	Bromodomain-containing factor 1	P35817	28.1654	28.0538	28.0055	28.1515	28.0254	5.1233	28.0361	27.9067	28.1967	28.0279	27.8621	9.19525	0.0744538	0.299174
BDF2	YDL070W	Bromodomain-containing factor 2	Q07442	22.0856	22.0939	22.1172	21.9257	21.9763	5.72985	21.726		22.0073	22.0118	21.9724	9.04556	0.11038	0.177145
BDH1	YAL060W	(R,R)-butanediol dehydrogenase	P39714	29.5459	29.3156	29.2998	29.3121	29.1987	9.17536	29.4906	29.1883	29.4776	29.3656	29.575	10.0053	-0.0849951	0.361315
BDH2	YAL061W	Probable diacetyl reductase [(R)-acetoin forming] 2	P39713	23.6117	23.1492	23.0293	23.417	24.2005	34.9521	24.0657	22.9548	23.6231	23.6403	24.2628	32.2958	-0.227824	0.477294
BDP1	YNL039W	Transcription factor TFIIIB component B	P46678	25.6826	25.5074	25.6046	25.6661	25.6688	4.93197	25.4679	25.5605	25.9005	25.6853	25.633	11.5929	-0.0235713	0.774609
BEM1	YBR200W	Bud emergence protein 1	P29366	26.9121	27.1308	26.8589	27.0478	26.8627	8.55561	26.9553	26.8734	27.0636	27.0405	27.1191	6.61836	-0.0479334	0.509128
BEM2	YER155C	GTPase-activating protein BEM2/IPL2	P39960	29.6715	29.6291	29.6717	29.6555	29.6072	1.948	29.7264	29.6775	29.5772	29.6371	29.7215	4.28059	-0.0209223	0.513571
BEM3	YPL115C	GTPase-activating protein BEM3	P32873	25.5965	25.6727	25.6148	25.5336	25.537	4.0445	25.7595	25.6555	25.629	25.6466	25.8478	6.60816	-0.116736	0.0451081
BEM4	YPL161C	Bud emergence protein 4	P39011	21.9163		22.2547	22.0825	21.914	11.511	22.3296	22.4944	21.838	21.9232	22.2424	18.899	-0.123663	0.458173
BER1	YLR412W	SRR1-like protein BER1	Q06688	22.7735	22.0222		22.7128	22.2799	23.9667	23.0725	22.2553	22.1077	22.5495	22.5876	27.0832	-0.0674308	0.791365
BET1	YIL004C	Protein transport protein BET1	P22804	26.4281	26.103	26.3092	26.2715	25.7697	16.5623	26.3861	25.3955	26.2621	26.1316	26.2968	23.4413	0.0818889	0.710293
BET2	YPR176C	Geranylgeranyl transferase type-2 subunit beta	P20133	22.3893	22.9747	22.4034	22.1785	22.2316	24.4189	22.1621	22.2923	22.809	22.5	21.5981	29.3134	0.163187	0.525441
BET3	YKR068C	Trafficking protein particle complex subunit BET3	P36149	24.3901	24.1469	24.7235	24.3202	24.6905	17.0931	24.9025	24.5284	24.2287	24.7466	24.5195	17.4707	-0.130907	0.434445
BET4	YJL031C	Geranylgeranyl transferase type-2 subunit alpha	Q00618	25.9188	26.0212	26.1413	26.0554	26.0919	5.72681	25.9624	26.191	26.0247	25.8686	26.1309	8.91568	0.0102194	0.885577
BET5	YML077W	Trafficking protein particle complex subunit BET5	Q03630		20.6111	21.1578	20.992		18.6627	20.8884	22.2494	21.0193		22.0245	45.8728	-0.625104	0.206482
BFR1	YOR198C	Nuclear segregation protein BFR1	P38934	32.7285	32.9278	32.6198	32.7549	32.7049	8.03052	32.6511	32.4019	32.9161	32.7932	32.7087	12.8576	0.0529754	0.608507
BFR2	YDR299W	Protein BFR2	Q06631	27.8095	27.9708	28.0617	27.8638	27.6971	9.79628	27.9235	28.0605	27.7671	27.7764	27.9708	8.79174	-0.019114	0.827538
BGL2	YGR282C	Glucan 1,3-beta-glucosidase	P15703	32.2773	32.2022	32.2658	32.2508	32.3558	3.89238	32.1784	32.4137	32.1722	32.3024	32.1745	7.6562	0.0220962	0.694327
BIG1	YHR101C	Protein BIG1	P38813	23.0171	22.6267	23.5176	23.9963	23.188	37.002	23.2616	23.0482	23.4311	22.8588	22.3845	26.0673	0.272299	0.381416
BIK1	YCL029C	Nuclear fusion protein BIK1	P11709	26.0913	26.2865	26.1051	26.2808	26.1466	6.62939	26.342	25.894	26.1741	26.0933	26.3366	12.5725	0.0140513	0.884461
BIM1	YER016W	Protein BIM1	P40013	25.7942	25.8674	25.6283	25.8363	25.7888	6.20429	25.5873	25.5907	25.9319	25.7781	26.1869	18.1746	-0.0319537	0.79729
BIO2	YGR286C	Biotin synthase, mitochondrial	P32451	25.2384	24.8686	24.5508	25.0938	24.877	17.6579	25.1488	24.9422	25.2983	25.0705	25.2743	10.063	-0.221118	0.137503
BIR1	YJR089W	Protein BIR1	P47134	23.3872	24.4435	25.438	23.882	24.2822	57.9806	24.6452	24.2965	24.4116	25.6541	23.8866	53.3302	-0.292211	0.535304
BLM10	YFL007W	Proteasome activator BLM10	P43583	26.7438	26.7383	26.7848	26.7543	26.6749	2.76117	27.0187	26.847	26.76	26.8361	27.1766	12.0109	-0.188456	0.0408523
BMH1	YER177W	Protein BMH1	P29311	33.1784	33.1342	33.044	33.0031	33.1497	5.12761	33.1442	33.13	33.02	33.2725	33.3968	10.1887	-0.090814	0.248366
BMH2	YDR099W	Protein BMH2	P34730	30.2919	30.2464	30.0078	30.0398	30.2546	9.07763	30.7203	30.6309	30.3269	30.4553	30.3929	11.5857	-0.337156	0.00746717
BMS1	YPL217C	Ribosome biogenesis protein BMS1	Q08965	28.375	28.3927	28.4175	28.4337	28.1637	7.28335	28.424	28.1065	28.4246	28.4169	28.5371	10.5973	-0.025294	0.779934
BMT5	YIL096C	25S rRNA (uridine(2634)-N(3))-methyltransferase	P40493	22.8421	22.6208	23.2138	21.9754	22.5782	29.9457	22.9454	22.0383	22.4948	23.1764	22.7493	28.4826	-0.0347892	0.904647
BMT6	YLR063W	25S rRNA (uridine(2843)-N(3))-methyltransferase	Q12291	23.2088	23.6147	22.9205	23.3645	22.95	20.6262	23.4285	22.8377	23.4345	23.3844	23.2597	15.7554	-0.0572757	0.747638
BNA1	YJR025C	3-hydroxyanthranilate 3,4-dioxygenase	P47096	29.2038	29.2538	29.0995	29.089	29.2403	5.37441	29.032	29.6475	29.4669	29.3296	29.0516	18.506	-0.128233	0.331118
BNA2	YJR078W	Indoleamine 2,3-dioxygenase	P47125	26.7868	26.5658	26.3687	26.9547	26.6926	15.197	26.8654	27.0109	26.9704	26.4303	27.1046	16.6328	-0.202601	0.225022
BNA3	YJL060W	Probable kynurenine--oxoglutarate transaminase BNA3	P47039	28.7317	28.6025	28.7695	28.7624	28.6335	5.2809	28.73	28.3158	28.5507	28.6231	28.897	14.7343	0.0765809	0.476016
BNA4	YBL098W	Kynurenine 3-monooxygenase	P38169	27.6767	27.6865	27.1538	27.4657	27.2442	16.643	27.319	27.3688	27.577	27.4897	27.5519	7.76242	-0.0158737	0.898166
BNA5	YLR231C	Kynureninase	Q05979	29.5928	29.4835	29.3329	29.5376	29.5427	6.72474	29.4874	29.3616	29.5651	29.4891	29.4372	5.17513	0.0298231	0.608289
BNA6	YFR047C	Nicotinate-nucleotide pyrophosphorylase [carboxylating]	P43619	29.3397	29.2315	29.2199	29.3299	29.3639	4.56894	29.379	29.2205	29.296	29.2443	29.4598	6.95249	-0.0229383	0.678384
BNA7	YDR428C	Kynurenine formamidase	Q04066	25.6216	25.6253	25.6539	25.573	25.6117	2.01848	25.873	25.3118	25.6388	25.6279	25.9765	17.3188	-0.0685165	0.570528
BNI1	YNL271C	Protein BNI1	P41832	27.2506	27.155	27.1497	27.2755	27.1656	4.13349	27.3364	26.7155	27.387	27.2722	27.3748	17.2936	-0.017905	0.893628
BNI4	YNL233W	Protein BNI4	P53858	25.957	26.0245	25.7787	25.7806	25.8351	7.76526	25.7868	25.853	25.8747	25.887	25.7177	4.83701	0.0513552	0.407172
BNI5	YNL166C	Bud neck protein 5	P53890	27.05	27.0127	26.947	26.9544	26.9552	3.17597	27.0049	26.7902	27.2496	27.1114	27.337	14.4652	-0.114753	0.27517
BOI1	YBL085W	Protein BOB1	P38041	27.6306	27.6441	27.7514	27.527	27.4774	7.4575	27.7937	27.3826	27.5514	27.563	27.6375	10.3645	0.0204558	0.80956
BOI2	YER114C	Protein BOI2	P39969	26.6292	26.51	26.4779	26.7223	26.5717	6.84071	26.6583	26.3726	26.7054	26.5448	26.4788	9.25903	0.0302627	0.694591
BOP3	YNL042W	Protein BOP3	P53958	22.5729	22.583	22.1696	22.2327	22.3831	13.0917	23.4328	22.6294	23.1485	22.3995	23.2548	28.5548	-0.584728	0.0255508
BOS1	YLR078C	Protein transport protein BOS1	P25385	27.8667	28.025	28.0597	27.953	27.7114	9.41039	27.917	27.9546	27.9448	27.8396	28.108	6.91877	-0.0296608	0.707341
BPH1	YCR032W	Beige protein homolog 1	P25356	22.6188	22.2374	22.766	22.8278	22.3918	16.8457	22.792	22.2767	22.8897	22.864	23.1707	20.992	-0.230281	0.244792
BPL1	YDL141W	Biotin--protein ligase;Biotin--[methylmalonyl-CoA-carboxytransferase] ligase;Biotin--[propionyl-CoA-carboxylase [ATP-hydrolyzing]] ligase;Biotin--[methylcrotonoyl-CoA-carboxylase] ligase;Biotin--[acetyl-CoA-carboxylase] ligase	P48445	27.6518	27.7157	27.624	27.8058	27.563	6.49554	27.7142	27.4115	27.518	27.6056	27.8153	11.0022	0.0591591	0.492323
BPT1	YLL015W	Bile pigment transporter 1	P14772	26.8473	26.8955	26.712	26.7943	26.7537	5.06776	26.6468	26.6679	26.8756	26.8926	26.7325	8.02439	0.0374811	0.555536
BRE1	YDL074C	E3 ubiquitin-protein ligase BRE1	Q07457	27.8722	27.8611	27.9565	27.914	27.9445	2.93477	28.1327	27.7812	27.9184	28.0671	28.0611	9.53402	-0.0824375	0.247303
BRE2	YLR015W	COMPASS component BRE2	P43132	25.4792	25.6001	25.2185	25.4045	25.4391	9.43389	25.2319	24.8487	25.3283	25.2363	25.5	15.7181	0.19922	0.145244
BRE5	YNR051C	UBP3-associated protein BRE5	P53741	27.8787	27.9414	27.9605	28.0265	27.7727	6.54897	28.0892	27.8687	28.0544	27.951	28.2126	9.15899	-0.119248	0.140565
BRF1	YGR246C	Transcription factor IIIB 70 kDa subunit	P29056	25.0317	25.3263	25.2534	25.1704	25.007	9.56977	25.2889	24.6846	25.2709	25.2686	25.1957	15.8777	0.0160245	0.905582
BRL1	YHR036W	Nucleus export protein BRL1	P38770	23.6436	23.7395	23.9536	23.623	23.7895	9.44095	23.839	23.5275	23.9265	23.6504	23.5164	12.952	0.0578695	0.584895
BRN1	YBL097W	Condensin complex subunit 2	P38170	25.0921	25.1155	24.9168	25.0081	24.8704	7.36416	25.4345	24.4611	25.2755	25.1274	25.4299	24.0216	-0.145094	0.458974
BRO1	YPL084W	Vacuolar-sorting protein BRO1	P48582	28.7743	28.5284	28.6986	28.6883	28.6187	6.36204	28.7602	28.5745	28.5772	28.596	28.6793	5.70241	0.0242422	0.671003
BRR1	YPR057W	Pre-mRNA-splicing factor BRR1	Q99177	22.5545	22.4048	23.251	22.988	22.7501	23.9214	22.8204	22.3305	22.6351	22.3848	22.8717	16.8419	0.181167	0.360983
BRR2	YER172C	Pre-mRNA-splicing helicase BRR2	P32639	28.3602	28.3536	28.3116	28.4697	28.3847	4.1215	28.5406	28.0934	28.3152	28.487	28.5853	13.3194	-0.0283487	0.770546
BRX1	YOL077C	Ribosome biogenesis protein BRX1	Q08235	29.2378	29.1401	29.6474	29.3364	29.4341	13.8662	29.2575	29.7946	29.175	29.2032	28.9813	23.201	0.0768384	0.647487
BSD2	YBR290W	Metal homeostatis protein BSD2	P38356	22.4501	22.8427	22.9155	22.7862	22.2632	18.537	22.5654	22.668	22.959	22.9045	22.7798	11.1855	-0.123791	0.41876
BSP1	YPR171W	Protein BSP1	Q06604	25.6937	26.0762	26.2889	26.4159	26.1387	17.9171	26.1803	26.3049	26.0269	26.141	26.2028	6.95673	-0.0484732	0.720004
BTN2	YGR142W	Protein BTN2	P53286	26.4354	26.7939	23.8674	27.8653		81.708		26.6241		27.0263	27.3949	26.3372	-0.77461	0.481742
BTS1	YPL069C	Geranylgeranyl pyrophosphate synthase	Q12051	22.5133	22.6101	22.6106	22.4844	22.6932	5.82921	22.4703	22.649	22.44	22.6604	22.8134	10.6745	-0.0242842	0.763785
BUB3	YOR026W	Cell cycle arrest protein BUB3	P26449	23.93	23.6614	23.7832	23.8944	23.7095	8.01691	23.7922	23.1453	23.7164	23.8801	23.8389	18.3494	0.121116	0.426679
BUD13	YGL174W	Pre-mRNA-splicing factor CWC26	P46947	24.6295	24.6077	24.3845	24.4042	24.5735	7.96828	24.8136	23.3351	24.8255	24.6785	25.0132	34.6015	-0.0133204	0.966634
BUD14	YAR014C	Bud site selection protein 14	P27637	26.9411	26.9734	26.6019	26.9638	26.7308	11.2069	27.0716	26.5535	27.0806	27.1622	27.0442	15.178	-0.14022	0.319904
BUD16	YEL029C	Putative pyridoxal kinase BUD16	P39988	25.0455	25.1707	24.7199	25.0179	24.8611	11.916	24.8586	24.8857	24.6413	24.9376	24.9281	8.00403	0.11277	0.26999
BUD17	YNR027W	Putative pyridoxal kinase BUD17	P53727	22.7725	22.2861	22.7841	22.9761	22.9057	16.992	23.3067	23.96	22.8933	22.9956	22.6245	39.277	-0.411151	0.150666
BUD2	YKL092C	Inhibitory regulator protein BUD2/CLA2	P33314	25.3538	25.158	25.2047	25.1564	25.0322	8.12989	25.0902	24.8163	25.2277	25.2877	25.2884	12.969	0.0389575	0.715315
BUD21	YOR078W	Bud site selection protein 21	Q08492	25.7345	25.859	25.8449	26.0176	25.703	8.75541	25.7998	24.7457	25.9606	25.7933	25.9232	27.7689	0.187305	0.446198
BUD22	YMR014W	Bud site selection protein 22	Q04347	25.1222	25.0367	25.3176	25.2139	25.2547	7.60165	25.1062	25.4123	25.1075	25.0371	25.2793	10.9324	0.000565157	0.994844
BUD23	YCR047C	18S rRNA (guanine(1575)-N(7))-methyltransferase	P25627	24.8575	24.7856	24.9043	24.902	24.8343	3.42279	24.8408	24.7333	24.8305	24.5959	25.2319	17.4382	0.0102991	0.926533
BUD27	YFL023W	Bud site selection protein 27	P43573	27.9697	28.0999	27.7892	27.9251	27.8539	8.31178	27.8553	27.1825	27.9642	27.9971	28.054	21.2283	0.116973	0.508035
BUD3	YCL014W	Bud site selection protein 3	P25558	26.4769	26.3974	26.3471	26.3949	26.3261	4.07037	26.3953	26.1053	26.5094	26.2654	26.5146	11.7228	0.0304893	0.720018
BUD32	YGR262C	EKC/KEOPS complex subunit BUD32	P53323	24.5721	24.4624	24.4403	24.7228	24.6176	8.10268	23.6636	24.7407	24.5943	24.0305	23.901	32.2851	0.37699	0.114552
BUD4	YJR092W	Bud site selection protein 4	P47136	26.0966	26.2757	26.168	25.7948	25.9447	12.8654	26.1355	25.7248	26.1695	26.2264	26.1829	12.9888	-0.0318678	0.805066
BUD6	YLR319C	Bud site selection protein 6	P41697	26.6119	26.4532	26.5049	26.6454	26.7236	7.51957	26.8136	26.3308	26.7455	26.7296	26.9146	14.2848	-0.119007	0.313907
BUD7	YOR299W	Bud site selection protein 7	Q08754	25.9278	26.0611	25.9353	25.8488	25.9392	5.33752	26.4891	25.6106	26.0331	26.0616	25.8272	23.4664	-0.0618767	0.690343
BUD8	YLR353W	Bud site selection protein 8	P41698	23.7791	23.7524	23.7804	24.1025	23.7715	11.0124	24.2655	23.5318	23.908	23.9791	24.0249	17.6746	-0.104713	0.463949
BUG1	YDL099W	Binder of USO1 and GRH1 protein 1	Q12191	27.3812	27.5646	27.3444	27.5167	27.4923	6.41717	27.3572	26.9706	27.7494	27.4802	27.6001	19.2657	0.0283397	0.843177
BUL1	YMR275C	Ubiquitin ligase-binding protein BUL1	P48524	26.9325	27.0039	26.9416	27.1206	26.7253	9.76708	26.8826	26.5617	27.0279	26.865	26.7457	11.8281	0.12818	0.240157
BUL2	YML111W	Ubiquitin ligase-binding protein BUL2	Q03758	26.0441	26.1069	26.2805	26.2658	25.9638	9.58319	26.2224	25.7705	26.0963	26.0605	26.0193	11.0796	0.0984235	0.3377
BUR2	YLR226W	Protein BUR2	Q05949	24.4498	24.6521	24.844	24.5578	24.5665	10.5108	25.0611	25.1339	24.6047	24.5052	24.9342	18.757	-0.233769	0.136062
BUR6	YER159C	Negative cofactor 2 complex subunit alpha	P40096	25.7131	26.2004	25.6279	25.8524	25.962	16.0025	25.8906	25.4733	26.1595	25.8337	26.7249	34.6095	-0.145265	0.547095
BYE1	YKL005C	Transcription factor BYE1	P36106	25.0768	24.4763	24.673	24.9964	24.5482	18.88	25.091	24.1985	24.6038	24.682	25.0986	24.9435	0.0193655	0.927717
BZZ1	YHR114W	Protein BZZ1	P38822	28.0089	28.0232	28.0918	28.1304	27.9853	4.24601	28.3024	27.9592	28.0557	28.0308	28.0863	9.32137	-0.038963	0.558913
CAB1	YDR531W	Pantothenate kinase CAB1	Q04430	26.5297	26.9922	26.4403	26.8431	26.4444	18.0569	26.5983	26.0881	27.0247	26.7231	27.09	25.5645	-0.0549332	0.801974
CAB2	YIL083C	Phosphopantothenate--cysteine ligase CAB2	P40506	27.3785	26.9911	27.4936	27.3709	27.4924	13.2373	27.5777	27.7468	27.0783	27.324	27.3135	18.052	-0.0627945	0.682902
CAB3	YKL088W	Coenzyme A biosynthesis protein 3	P36076	27.4979	27.5686	27.3704	27.4662	27.2742	7.86552	27.7933	27.1354	27.7846	27.5923	27.657	16.9211	-0.157082	0.264781
CAB4	YGR277C	Phosphopantetheine adenylyltransferase	P53332	27.1207	26.8983	27.2342	27.0101	27.0064	8.95903	27.1057	27.1575	26.9821	26.969	26.9558	6.42118	0.0199094	0.784151
CAB5	YDR196C	Dephospho-CoA kinase CAB5	Q03941	23.9412	23.45	23.8819	23.7593	23.9999	14.1612	23.9751	23.8812	23.2598	23.9112	23.6894	18.2222	0.0630997	0.707927
CAC2	YML102W	Chromatin assembly factor 1 subunit p60	Q04199	24.8276	24.8154	24.9771	24.8476	24.737	6.12072	25.2012	24.5114	24.9664	24.7378	24.9846	17.8176	-0.0393438	0.759288
CAF120	YNL278W	CCR4-NOT transcriptional complex subunit CAF120	P53836	23.8351	23.8372	23.7865	23.8716	23.1503	18.3729	23.3951	23.1835	23.9754	23.6084	23.6363	20.7701	0.136416	0.494281
CAF130	YGR134W	Protein CAF130	P53280	24.9977	25.1031	24.5754	24.9029	24.4194	19.3812	25.254	24.5221	24.7501	24.6724	24.529	22.9813	0.0542038	0.779008
CAF16	YFL028C	CCR4-associated factor 16	P43569	27.8731	28.0318	27.7727	27.8192	27.718	8.54596	27.6216	27.6557	27.9397	27.7924	27.9829	11.2613	0.0444963	0.635686
CAF20	YOR276W	Cap-associated protein CAF20	P12962	28.9047	29.0729	28.8422	28.8098	28.7795	8.35429	28.4052	28.4368	29.1962	28.9494	28.4246	26.7726	0.19937	0.28042
CAF4	YKR036C	CCR4-associated factor 4	P36130	25.3967	25.1252	25.5448	25.5053	25.4182	10.8071	25.7044	25.3427	25.4799	25.557	25.3945	10.0685	-0.0976626	0.344634
CAF40	YNL288W	Protein CAF40	P53829	24.4618	24.1147	24.8159	24.8819	24.7646	20.3766	24.5043	24.7077	24.2378	24.2416	24.6033	14.6101	0.148846	0.410752
CAJ1	YER048C	Protein CAJ1	P39101	29.3403	29.3897	29.3135	29.2623	29.2727	3.62109	29.541	29.1158	29.5579	29.4082	29.6677	13.8923	-0.142423	0.183332
CAK1	YFL029C	Serine/threonine-protein kinase CAK1	P43568	27.6786	27.6423	27.8459	27.6405	27.562	7.49715	27.8491	27.7286	27.2172	27.619	27.9245	17.764	0.00621216	0.963806
CAM1	YPL048W	Elongation factor 1-gamma 1	P29547	31.9161	31.9227	31.8398	31.9312	31.9677	3.20596	32.0028	31.9158	31.9174	31.893	31.8923	3.20975	-0.0087244	0.772624
CAN1	YEL063C	Arginine permease	P04817	23.3707	23.5405	23.1363	23.6357	23.0748	16.8454	23.6171	23.2534	23.5478	23.205	23.5495	12.8602	-0.0829488	0.566264
CAP1	YKL007W	F-actin-capping protein subunit alpha	P28495	29.1696	29.3725	29.3349	29.2458	29.2934	5.43482	29.614	29.4035	29.2014	29.2017	29.4078	12.1571	-0.0824443	0.359351
CAP2	YIL034C	F-actin-capping protein subunit beta	P13517	29.7316	29.5291	29.7383	29.6563	29.7702	6.51914	30.0539	29.7651	29.6451	29.7617	29.8619	10.9007	-0.132431	0.140211
CAR1	YPL111W	Arginase	P00812	28.5923	28.5634	28.5268	28.6338	28.4758	4.18597	28.6477	28.5831	28.7011	28.6273	28.8346	6.8868	-0.120335	0.0463504
CAR2	YLR438W	Ornithine aminotransferase	P07991	30.2896	30.1958	30.3379	30.1849	30.425	7.01935	29.976	30.3704	29.9625	30.2101	29.9041	14.1752	0.202019	0.0762519
CAT5	YOR125C	Catabolite repression protein CAT5	P41735	26.0607	25.9653	25.8275	26.2357	26.4957	18.5342	26.6802	25.5845	26.2071	25.8738	25.7934	31.9635	0.0891871	0.700485
CBC2	YPL178W	Nuclear cap-binding protein subunit 2	Q08920	27.8407	27.7412	27.6966	27.9077	27.6211	7.92604	27.7603	27.4179	27.7352	27.8765	27.7858	11.3654	0.0463037	0.632774
CBF1	YJR060W	Centromere-binding protein 1	P17106	28.2122	28.2171	28.3353	28.3984	28.1456	7.16793	28.4879	27.5327	28.3811	28.3362	28.5489	23.9316	0.00434392	0.982377
CBF2	YGR140W	Centromere DNA-binding protein complex CBF3 subunit A	P32504	22.4904	22.4241	22.8771	22.588	22.8031	13.7481	23.0939	21.2453	22.1308	22.4613	22.9323	43.6658	0.263859	0.461267
CBF5	YLR175W	H/ACA ribonucleoprotein complex subunit 4	P33322	30.6299	30.7525	30.6616	30.6438	30.651	3.44379	30.5917	30.7447	30.574	30.6311	30.7053	5.12139	0.0184236	0.652631
CBK1	YNL161W	Serine/threonine-protein kinase CBK1	P53894	27.3141	27.2172	27.0277	27.2885	26.9686	10.6389	27.2511	26.9423	27.1306	27.1481	27.5207	15.1443	-0.0353361	0.771628
CBP2	YHL038C	Cytochrome B pre-mRNA-processing protein 2	P03874	25.1115	24.9983	25.1249	25.1129	24.7371	10.7266	25.3686	24.5372	25.1501	25.1005	25.1521	19.4393	-0.0447811	0.783192
CBP3	YPL215W	Protein CBP3, mitochondrial	P21560	26.5533	26.6089	26.7745	26.4698	26.4502	9.29411	26.6955	26.2552	26.4815	26.5294	26.579	10.9077	0.0632318	0.516125
CBP4	YGR174C	Assembly factor CBP4	P37267	25.067	24.8119	24.7368	25.1192	25.2014	13.6976	25.4177	24.3833	25.1679	25.0632	25.0464	23.8438	-0.0284212	0.887023
CBP6	YBR120C	Cytochrome B pre-mRNA-processing protein 6	P07253	22.6792	22.7469	22.0366	22.5419	22.7038	17.9979	23.2375	22.796	22.4922	22.2731	22.7808	25.882	-0.174235	0.428035
CBR1	YIL043C	NADH-cytochrome b5 reductase 1	P38626	30.8274	30.8667	30.7201	30.9015	30.814	4.67939	30.6504	30.7573	30.8678	30.6967	30.7807	5.79627	0.0753605	0.156122
CCA1	YER168C	CCA tRNA nucleotidyltransferase, mitochondrial	P21269-2;P21269	27.9574	28.016	27.9786	27.9242	27.8451	4.43176	28.1165	27.8345	28.1398	28.0131	28.2755	11.1557	-0.13163	0.133802
CCC1	YLR220W	Protein CCC1	P47818	26.9215	26.8232	26.7889	26.8257	26.5238	9.86647	26.6158	26.5696	26.792	26.7548	27.2306	19.6832	-0.0159455	0.908816
CCC2	YDR270W	Copper-transporting ATPase	P38995	25.4445	25.6111	25.6361	25.5981	25.595	5.09143	25.5683	25.3878	25.2328	25.8288	25.8816	19.0688	-0.00288353	0.982732
CCE1	YKL011C	Cruciform cutting endonuclease 1, mitochondrial	Q03702	23.2301	22.9823	23.4073	23.4584	23.5103	14.1192	22.4579	23.1985	23.2859	23.3316	23.1509	21.1897	0.232719	0.247722
CCL1	YPR025C	Cyclin CCL1	P37366	24.8587	24.6328	25.0543	24.7746	24.8129	10.7649	25.1584	24.4084	24.7949	24.8039	25.1078	19.9034	-0.0280124	0.857282
CCM1	YGR150C	Mitochondrial group I intron splicing factor CCM1	P48237	24.6357	24.648	24.6035	24.7218	24.5524	4.33136	24.3067	24.5192	24.737	24.9373	24.8394	16.9961	-0.0356194	0.768992
CCP1	YKR066C	Cytochrome c peroxidase, mitochondrial	P00431	29.8041	29.6525	29.4735	29.7278	29.5311	9.42244	29.868	29.631	29.6483	29.559	29.9242	11.2372	-0.0883138	0.374981
CCR4	YAL021C	Glucose-repressible alcohol dehydrogenase transcriptional effector	P31384	29.0938	29.0208	28.9839	28.9581	28.8884	5.27919	28.6757	28.6102	28.9309	28.9404	28.9588	11.2354	0.165786	0.0773615
CCS1	YMR038C	Superoxide dismutase 1 copper chaperone	P40202	29.24	29.3103	29.0451	29.2289	29.3392	7.69446	28.916	29.7411	29.3293	29.2978	29.1444	21.793	-0.0530299	0.723507
CCT2	YIL142W	T-complex protein 1 subunit beta	P39076	31.1052	31.2533	31.1903	31.1651	31.1874	3.68836	30.8877	30.9894	31.2	31.2136	31.1687	9.81334	0.0883691	0.23778
CCT3	YJL014W	T-complex protein 1 subunit gamma	P39077	31.0524	31.0772	31.0556	31.0105	30.9135	4.42336	31.1323	31.1475	31.0788	31.0862	31.1281	2.09304	-0.0927615	0.0203311
CCT4	YDL143W	T-complex protein 1 subunit delta	P39078	30.8105	30.8998	30.6695	30.7797	30.666	6.91567	30.4976	30.728	30.824	30.7537	30.928	10.698	0.0188552	0.827744
CCT5	YJR064W	T-complex protein 1 subunit epsilon	P40413	30.8731	30.8753	30.8999	30.8619	30.7829	3.03994	30.7641	30.7612	30.903	30.8834	30.9888	6.7693	-0.001461	0.976411
CCT6	YDR188W	T-complex protein 1 subunit zeta	P39079	31.0452	30.9302	30.9076	31.0612	30.9491	4.87073	30.8351	30.679	31.0327	30.9473	31.1728	12.9512	0.0453093	0.627476
CCT7	YJL111W	T-complex protein 1 subunit eta	P42943	30.8196	30.8137	30.8518	30.7919	30.7537	2.50934	30.7522	31.1317	30.7474	30.938	30.8747	11.3105	-0.0827113	0.287824
CCT8	YJL008C	T-complex protein 1 subunit theta	P47079	31.439	31.4714	31.5088	31.4562	31.3941	2.91826	31.4812	31.28	31.4114	31.4218	31.5522	6.89252	0.0245545	0.628282
CCW12	YLR110C	Covalently-linked cell wall protein 12;Putative covalently bound cell wall protein 22	Q12127;Q7LHD1	23.0707	23.0937	23.126	24.0346	22.7951	38.2783	23.8408	23.7169	22.8314	23.4839	23.1391	27.3115	-0.178382	0.543916
CCW14	YLR390W-A	Covalently-linked cell wall protein 14	O13547	28.2343	28.6047	28.4027	28.2741	28.5005	10.7622	28.1114	29.2023	28.2636	28.4038	28.569	32.749	-0.106757	0.609942
CCZ1	YBR131W	Vacuolar fusion protein CCZ1	P38273	21.1702	21.178	21.5451	21.4629	21.2927	11.8367	21.446			21.5847	21.6768	7.98219	-0.239397	0.0762612
CDC1	YDR182W	Cell division control protein 1	P40986	27.6324	27.3555	27.6964	27.66	27.4601	9.88846	27.8626	27.5023	27.4297	27.5501	27.5199	12.3838	-0.0120625	0.90659
CDC10	YCR002C	Cell division control protein 10	P25342	29.8057	29.7162	29.8179	29.7864	29.7396	3.00867	29.9435	29.6306	29.6692	29.7911	29.8608	9.04469	-0.00589433	0.925979
CDC11	YJR076C	Cell division control protein 11	P32458	28.5706	28.5722	28.5638	28.5409	28.6243	2.13789	28.5488	28.7075	28.4994	28.5308	28.7727	8.49057	-0.0374925	0.519494
CDC12	YHR107C	Cell division control protein 12	P32468	30.2875	30.3663	30.2572	30.3435	30.2065	4.46682	30.5047	30.0888	30.3845	30.3801	30.4852	10.8995	-0.0764686	0.366277
CDC123	YLR215C	Cell division cycle protein 123	Q05791	27.1203	26.9564	27.3359	26.5681	26.4683	25.0568	26.3042	26.5153	26.5662	26.1412	26.577	12.7322	0.468969	0.0349319
CDC13	YDL220C	Cell division control protein 13	P32797	23.134	23.8079	23.543	23.8587	23.5018	19.1158	23.2656	23.24	23.6182	23.4616	23.4848	11.0279	0.15505	0.324724
CDC14	YFR028C	Tyrosine-protein phosphatase CDC14	Q00684	26.532	26.4733	26.4154	26.4412	26.193	8.58622	26.6705	26.1656	26.5764	26.3016	26.7321	16.3982	-0.0782727	0.544722
CDC16	YKL022C	Anaphase-promoting complex subunit CDC16	P09798	24.402	24.1872	24.8579	24.3678	23.9215	24.7	24.7955	24.0104	23.8229	24.2276	24.0864	28.2895	0.158705	0.501481
CDC19	YAL038W	Pyruvate kinase 1	P00549	35.6906	35.7606	35.6318	35.7055	35.8015	4.53349	35.5679	35.9832	35.6084	35.6638	35.7372	11.9605	0.00591515	0.942221
CDC21	YOR074C	Thymidylate synthase	P06785	28.8552	28.7812	28.7707	28.6986	28.848	4.40796	28.8178	28.7077	28.5496	28.6875	28.6149	7.05521	0.115208	0.0636943
CDC23	YHR166C	Anaphase-promoting complex subunit CDC23	P16522	20.0387	20.5024	20.3431	20.4007	20.704	16.4649	20.3073	20.5339	20.743	20.5141	20.686	11.5456	-0.159066	0.265219
CDC24	YAL041W	Cell division control protein 24	P11433	26.7997	26.6438	26.771	26.8321	26.9729	8.24704	26.7533	26.7221	26.5722	26.8758	26.9294	9.57563	0.0333319	0.694987
CDC25	YLR310C	Cell division control protein 25	P04821	26.7048	26.7871	26.7459	26.7651	26.803	2.6371	27.057	26.8235	26.9499	26.8482	26.8257	7.20385	-0.139687	0.020534
CDC27	YBL084C	Anaphase-promoting complex subunit CDC27	P38042	21.9424	22.0628	22.3859	23.2112		44.3049	23.8061	22.7819	21.7247	22.287	22.9298	55.7238	-0.305365	0.533674
CDC28	YBR160W	Cyclin-dependent kinase 1	P00546	28.8098	28.8447	28.8683	28.9201	28.7672	4.0208	29.0411	28.6653	28.8064	28.8458	28.758	9.91145	0.018686	0.788686
CDC3	YLR314C	Cell division control protein 3	P32457	30.1067	30.1123	30.1087	30.1344	30.0026	3.50843	29.9084	29.8099	30.169	30.0474	30.1923	11.2787	0.0675879	0.407925
CDC31	YOR257W	Cell division control protein 31	P06704	25.4024	25.2456	25.456	25.3197	25.549	8.16832	25.5425	25.4531	25.5399	25.4513	25.1631	10.1706	-0.035451	0.695327
CDC33	YOL139C	Eukaryotic translation initiation factor 4E	P07260	31.1685	31.268	31.0068	31.3579	31.1277	9.28858	30.6881	31.0437	31.4818	31.1863	31.4064	20.7692	0.0245021	0.877395
CDC34	YDR054C	Ubiquitin-conjugating enzyme E2-34 kDa	P14682	26.1564	26.0359	26.5723	26.3164	26.1845	14.7861	26.4811	26.2548	26.1628	26.09	26.2466	10.5394	0.00602333	0.958666
CDC36	YDL165W	General negative regulator of transcription subunit 2	P06100	25.938	26.1685	25.2344	26.0675	25.5465	25.1888	25.6349	24.6433	26.0094	25.8668	26.078	32.2177	0.144494	0.658541
CDC37	YDR168W	Hsp90 co-chaperone Cdc37	P06101	29.8316	29.8221	29.8691	29.8268	29.7901	1.95769	29.8678	29.657	29.9144	29.8735	29.8642	6.75389	-0.00743865	0.878702
CDC39	YCR093W	General negative regulator of transcription subunit 1	P25655	29.2058	29.134	29.2144	29.2495	29.0777	4.7499	29.2393	29.1669	29.1205	29.1562	29.2802	4.55415	-0.0163507	0.710845
CDC4	YFL009W	Cell division control protein 4	P07834	23.5568	23.2559	23.6478	23.4188	23.2106	13.0448	23.6757	23.1865	23.1597	23.1572	23.1498	17.593	0.152221	0.284484
CDC40	YDR364C	Pre-mRNA-processing factor 17	P40968	22.3597	22.0447	22.9724	22.9883	22.1837	31.0655	22.7661	22.6555		21.9226	22.3414	24.5371	0.088352	0.761309
CDC42	YLR229C	Cell division control protein 42	P19073	28.1507	28.1601	27.7309	28.3007	27.9994	14.3295	28.4985	28.0437	28.0883	28.0427	28.4459	16.1824	-0.155433	0.301559
CDC45	YLR103C	Cell division control protein 45	Q08032	22.0482	22.4247		21.7102	22.0195	20.5923	21.8063	22.1851	21.8711	21.9521	22.3504	16.2502	0.0176496	0.921536
CDC48	YDL126C	Cell division control protein 48	P25694	33.7352	33.8075	33.6054	33.777	33.6398	6.00781	33.6397	33.5042	33.8165	33.8006	33.76	8.84629	0.0087928	0.903937
CDC5	YMR001C	Cell cycle serine/threonine-protein kinase CDC5/MSD2	P32562	27.4307	27.3914	27.1421	27.4172	27.2882	8.10776	26.9431	26.3934	27.2948	26.9291	27.4273	26.0888	0.336368	0.11082
CDC50	YCR094W	Cell division control protein 50	P25656	24.9133	24.796	24.637	24.529	24.6349	10.6869	24.3902	24.5931	24.4975	24.5444	24.7916	10.5238	0.138666	0.181784
CDC53	YDL132W	Cell division control protein 53	Q12018	28.0942	28.0154	28.1145	28.1542	28.1431	3.75588	28.0959	28.147	28.0547	28.1849	28.0882	3.58979	-0.00987225	0.77707
CDC55	YGL190C	Protein phosphatase PP2A regulatory subunit B	Q00362	27.5685	27.623	27.6511	27.5992	27.5819	2.29394	27.4216	27.8048	27.682	27.7416	27.7802	10.1303	-0.0812878	0.284333
CDC60	YPL160W	Leucine--tRNA ligase, cytoplasmic	P26637	33.4828	33.5129	33.3893	33.4771	33.4059	3.673	33.4999	33.3578	33.4609	33.4328	33.5501	4.98205	-0.00667641	0.871993
CDC7	YDL017W	Cell division control protein 7	P06243	22.4138	22.1254	21.9218	22.1471	22.1776	12.2882	22.1441	20.8702	22.3359	21.9761	22.5092	35.2295	0.190044	0.542706
CDC73	YLR418C	Cell division control protein 73	Q06697	28.9858	28.9864	28.863	29.0537	28.8467	6.13654	28.9221	28.5457	28.9165	28.89	29.1592	14.7159	0.0604255	0.583965
CDC8	YJR057W	Thymidylate kinase	P00572	24.4545	24.5131	24.3942	24.4626	24.3603	4.16095	25.1453	24.9393	24.716	24.6707	24.6437	15.5192	-0.38606	0.00471902
CDC9	YDL164C	DNA ligase 1	P04819-2;P04819	27.5744	27.3977	27.5477	27.6113	27.5002	5.61409	27.4724	27.2404	27.5785	27.4211	27.4631	8.33977	0.0911782	0.206669
CDS1	YBR029C	Phosphatidate cytidylyltransferase	P38221	27.5085	27.384	27.7015	27.4911	27.4201	8.81776	27.472	27.795	27.6686	27.4853	27.5552	9.65447	-0.0941738	0.284399
CEF1	YMR213W	Pre-mRNA-splicing factor CEF1	Q03654	24.788	24.9266	24.6776	24.8752	24.51	11.2297	25.0645	24.3594	24.7937	24.8101	24.9198	17.0205	-0.0340368	0.813328
CEG1	YGL130W	mRNA-capping enzyme subunit alpha	Q01159	27.6418	27.4852	27.6686	27.5411	27.2944	10.0287	27.717	27.7247	27.4989	27.5829	27.6998	6.76784	-0.118449	0.178552
CEM1	YER061C	3-oxoacyl-[acyl-carrier-protein] synthase homolog	P39525	27.8215	27.9693	27.6725	27.5516	27.6592	11.5004	27.8842	27.6577	27.7144	27.7374	27.8001	6.07354	-0.0239272	0.778852
CET1	YPL228W	mRNA-capping enzyme subunit beta	O13297	28.4636	28.2519	28.2078	28.2553	28.2783	7.17083	28.4506	27.9455	28.3513	28.4319	28.3016	13.1546	-0.00479928	0.963617
CEX1	YOR112W	Cytoplasmic export protein 1	Q12453	28.4242	28.455	28.4076	28.3739	28.3721	2.43471	28.3774	28.2297	28.4776	28.546	28.3735	8.23473	0.00573073	0.920837
CFD1	YIL003W	Cytosolic Fe-S cluster assembly factor CFD1	P40558	24.8498	25.0643	24.5129	24.5867	24.6868	15.815	24.6637	24.3508	24.9512	24.9008	25.0661	18.4724	-0.0464443	0.780303
CFT1	YDR301W	Protein CFT1	Q06632	26.6271	26.727	26.6566	26.6259	26.6246	3.09036	26.6794	26.2507	26.6992	26.7433	26.673	12.7796	0.0431353	0.653559
CFT2	YLR115W	Cleavage factor two protein 2	Q12102	26.7053	26.8191	26.5871	26.542	26.8032	8.58397	26.9835	26.4328	26.5851	26.619	26.8405	15.3498	-0.000840922	0.99422
CGI121	YML036W	EKC/KEOPS complex subunit CGI121	Q03705	27.1407	27.119	27.0278	27.26	27.0461	6.49689	27.3968	27.1423	27.1228	27.3191	27.538	12.2323	-0.185055	0.0698479
CHA1	YCL064C	Catabolic L-serine/threonine dehydratase;L-serine dehydratase;L-threonine dehydratase	P25379	31.4192	31.3517	31.2404	31.3411	31.3132	4.48045	31.5146	31.4398	31.3749	31.3615	31.4988	4.8232	-0.104802	0.0391571
CHA4	YLR098C	Activatory protein CHA4	P43634	25.0933	24.8491	25.2532	24.7545	25.0475	13.7272	25.4034	24.8906	25.5035	24.7994	25.4909	22.5456	-0.218069	0.254411
CHC1	YGL206C	Clathrin heavy chain	P22137	32.8509	32.6819	32.8374	32.8105	32.9631	6.93516	32.789	33.0917	32.7086	32.7535	32.8684	10.9704	-0.013491	0.872247
CHD1	YER164W	Chromo domain-containing protein 1	P32657	28.581	28.6269	28.6147	28.6143	28.4802	4.07559	28.5413	28.378	28.5976	28.5429	28.6308	6.54641	0.0453205	0.401203
CHK1	YBR274W	Serine/threonine-protein kinase CHK1	P38147	23.1402	23.4458	23.0838	23.3488	22.7295	18.3536	22.6705	21.7976	23.1634	22.716	23.9846	56.6315	0.283212	0.47461
CHO1	YER026C	CDP-diacylglycerol--serine O-phosphatidyltransferase	P08456	26.6483	26.8282	27.0012	26.4178	26.6551	15.1587	26.0225	27.1216	26.4867	26.6399	26.3725	29.0015	0.181486	0.400938
CHO2	YGR157W	Phosphatidylethanolamine N-methyltransferase	P05374	29.9261	29.7599	30.0324	29.9769	29.7988	8.00238	29.7396	29.8513	29.8347	29.8211	29.945	5.11543	0.0604594	0.3542
CHS1	YNL192W	Chitin synthase 1	P08004	25.4545	25.5969	25.7186	25.9491	25.2411	18.532	25.5531	25.4997	25.3642	25.2974	25.808	14.2232	0.0875317	0.572507
CHS2	YBR038W	Chitin synthase 2	P14180	25.2662	25.5433	25.6798	25.5051	25.143	14.8122	25.3671	24.8509	25.4541	25.4747	25.5445	17.2266	0.0892083	0.589142
CHS3	YBR023C	Chitin synthase 3	P29465	26.3801	26.5468	26.5456	26.5858	26.2698	9.11994	26.3938	26.3592	26.509	26.4899	26.6424	7.80589	-0.0132344	0.869854
CHS5	YLR330W	Chitin biosynthesis protein CHS5	Q12114	28.7292	28.7595	28.8539	28.6893	28.7873	4.33276	28.8556	28.613	28.6039	28.7246	28.769	7.42938	0.0506307	0.385794
CHS7	YHR142W	Chitin synthase export chaperone	P38843	23.5078	23.589	24.2413	24.0628	23.0751	31.4469	24.0878	23.7442	23.77	23.5321	23.7302	14.3841	-0.0776637	0.740281
CHZ1	YER030W	Histone H2A.Z-specific chaperone CHZ1	P40019	27.4786	27.2033	27.4031	27.074	27.169	11.8306	27.1696	25.997	27.4462	27.3215	27.3114	31.3911	0.216469	0.457281
CIA1	YDR267C	Cytosolic iron-sulfur protein assembly protein 1	Q05583	23.0518	23.1598	23.7445	23.4891	23.6961	21.0228	23.8199	23.2646	23.8903	23.322	23.7856	19.7706	-0.188186	0.358025
CIC1	YHR052W	Proteasome-interacting protein CIC1	P38779	28.3388	28.4019	28.3238	28.5276	28.3082	6.39951	28.4438	28.2216	28.3332	28.2445	28.5252	9.08306	0.0263854	0.718229
CIK1	YMR198W	Spindle pole body-associated protein CIK1	Q01649	29.7736	29.5968	30.3092	31.6576	30.3227	67.4016	31.3705	30.6508	29.7253	30.4485	31.5073	46.2258	-0.408504	0.424777
CIN2	YPL241C	Tubulin-specific chaperone C	P46670	22.7742	22.5346	23.4482	23.2008	23.0304	24.4357	23.6471	22.4604	23.0479	23.1512	22.9649	29.5561	-0.0566777	0.82504
CIN8	YEL061C	Kinesin-like protein CIN8	P27895	24.1461	24.6206	24.0367	24.7183	24.2761	20.8447	24.1572	23.682	24.4195	24.4509	24.6313	23.2109	0.0914004	0.677574
CIR1	YGR207C	Probable electron transfer flavoprotein subunit beta	P42940	29.951	30.0253	29.8087	29.9661	29.7868	7.17609	30.0974	29.4656	29.9892	29.8809	30.0863	16.4265	0.003727	0.977003
CIR2	YOR356W	Probable electron transfer flavoprotein-ubiquinone oxidoreductase, mitochondrial	Q08822	28.4594	28.4675	28.1281	28.506	28.2478	11.0927	28.3069	28.2979	28.4512	28.3844	28.8293	16.4185	-0.092173	0.473811
CIS3	YJL158C	Cell wall mannoprotein CIS3	P47001	27.8187	28.0934	27.8808	27.7909	27.6949	10.674	27.3004	27.8431	27.9361	27.7782	28.2678	23.2814	0.0305835	0.861305
CIT1	YNR001C	Citrate synthase, mitochondrial	P00890	31.7686	31.5743	31.5853	31.6085	31.7679	6.91235	31.978	31.8566	31.7501	31.8377	31.7832	6.17676	-0.180214	0.0157218
CIT2	YCR005C	Citrate synthase, peroxisomal	P08679	28.6392	28.4271	28.3656	28.5513	28.2706	10.197	28.6703	28.2829	28.5728	28.5904	28.5594	9.68164	-0.0843665	0.390649
CKA1	YIL035C	Casein kinase II subunit alpha	P15790	26.4693	26.2946	26.6962	26.2809	26.389	12.2353	25.9921	26.8788	26.3919	26.4809	26.3137	22.7187	0.0145363	0.930623
CKA2	YOR061W	Casein kinase II subunit alpha	P19454	28.0748	27.8025	28.4719	28.2463	28.2246	16.684	28.5503	28.5506	27.9887	28.0703	28.4524	18.112	-0.15845	0.363021
CKB1	YGL019W	Casein kinase II subunit beta	P43639	26.8728	26.7903	26.8742	26.706	26.7033	5.84695	26.7653	26.7544	26.8611	26.7729	26.9339	5.4744	-0.0282338	0.5972
CKB2	YOR039W	Casein kinase II subunit beta	P38930	27.2202	26.9601	27.3636	26.9991	27.1652	11.5319	27.4748	27.4362	27.1596	27.1549	27.1654	11.4696	-0.136528	0.224238
CKI1	YLR133W	Choline kinase	P20485	28.5695	28.3596	28.634	28.5202	28.4959	6.95565	28.5646	28.3946	28.34	28.531	28.4251	6.54914	0.0647809	0.327389
CKS1	YBR135W	Cyclin-dependent kinases regulatory subunit	P20486	25.7651	25.7324	25.8479	26.2398	25.8432	15.292	25.7351	25.9798	25.7173	25.7654	25.8862	7.94943	0.0689266	0.526982
CLA4	YNL298W	Serine/threonine-protein kinase CLA4	P48562	27.2692	27.2615	27.3099	27.2189	27.023	7.49849	27.4608	26.8606	27.3385	27.1817	27.5911	18.5804	-0.070053	0.62008
CLB2	YPR119W	G2/mitotic-specific cyclin-2	P24869	26.6581	27.1387	26.8502	26.5803	26.5075	18.5268	27.5144	26.2502	27.1255	26.9295	27.3522	30.0082	-0.287434	0.278543
CLB3	YDL155W	G2/mitotic-specific cyclin-3	P24870	23.4913	22.7172	23.2603	22.7339	22.8681	24.9235	22.8796		23.0293	22.6596	23.0803	12.6427	0.101955	0.614743
CLC1	YGR167W	Clathrin light chain	P17891	30.274	30.437	30.202	30.4886	30.121	10.7966	30.2787	28.9371	30.4914	30.241	30.3304	32.6717	0.24876	0.41798
CLF1	YLR117C	Pre-mRNA-splicing factor CLF1	Q12309	25.8255	25.8511	26.2131	26.2714	26.2368	14.8602	26.3019	26.1573	25.7583	26.2317	25.9726	14.5974	-0.00478554	0.973475
CLP1	YOR250C	mRNA cleavage and polyadenylation factor CLP1	Q08685	25.1881	25.0853	25.5061	25.1808	25.1132	12.4566	25.3741	25.0528	25.0041	25.1526	25.2351	10.4007	0.0509437	0.625115
CLU1	YMR012W	Clustered mitochondria protein 1	Q03690	32.1252	32.1063	32.1322	32.1277	32.0179	3.25745	32.01	32.0458	32.0341	32.1087	32.1031	3.02775	0.0414973	0.190152
CMD1	YBR109C	Calmodulin	P06787	29.2105	29.2973	29.1408	29.5682	29.3327	11.6976	29.2044	29.9802	29.4232	29.1062	29.0741	29.0044	-0.0477338	0.800086
CMK1	YFR014C	Calcium/calmodulin-dependent protein kinase I	P27466	26.4621	26.5385	26.7279	26.5909	26.682	7.41164	26.9842	26.7071	26.8131	26.6058	26.485	13.4317	-0.118755	0.26109
CMK2	YOL016C	Calcium/calmodulin-dependent protein kinase II	P22517	28.5648	28.5506	28.8041	28.3823	28.7035	11.0937	29.0775	28.7365	28.7393	28.8917	28.7172	11.1133	-0.231378	0.0485728
CMP2	YML057W	Serine/threonine-protein phosphatase 2B catalytic subunit A2	P14747	27.8094	27.8395	27.8476	27.784	27.8643	2.21436	28.0374	27.9192	27.8482	27.7921	28.0691	8.25108	-0.104225	0.0953287
CMS1	YLR003C	Protein CMS1	Q07897	26.318	26.3964	26.6413	26.5343	26.3927	9.13513	26.2647	26.3961	26.612	26.5833	26.2152	12.5039	0.0422662	0.68151
CNA1	YLR433C	Serine/threonine-protein phosphatase 2B catalytic subunit A1	P23287	27.4228	27.395	27.4849	27.4236	27.4942	3.00115	27.8854	27.1875	27.5425	27.5122	27.5809	17.1316	-0.0976123	0.411087
CNB1	YKL190W	Calcineurin subunit B	P25296	28.309	28.2968	28.2668	28.4346	27.9836	10.9973	28.3592	27.9245	28.3999	28.0607	28.5056	16.4708	0.00816039	0.952471
CNE1	YAL058W	Calnexin homolog	P27825	24.6332	24.3878	24.5343	24.7107	24.5527	8.27396	25.1032	24.2777	24.7895	24.3779	24.8124	23.3364	-0.108343	0.520473
CNM67	YNL225C	Chaotic nuclear migration protein 67	P53865	25.0027	25.0986	24.9757	24.9676	24.7914	7.544	25.2625	24.4823	25.07	24.9686	25.3395	21.3594	-0.0573877	0.727225
CNS1	YBR155W	Hsp70/Hsp90 co-chaperone CNS1	P33313	27.7791	27.8829	27.8179	27.872	27.7202	4.63476	27.7602	27.3638	27.9153	27.7032	27.7967	13.4977	0.106581	0.306287
COA4	YLR218C	Cytochrome oxidase assembly factor 4	Q05809	21.552	21.6999	21.5372	22.1146	21.1451	24.7368	22.5893	21.079	22.4233	21.4484	22.2347	40.3929	-0.345182	0.329585
COF1	YLL050C	Cofilin	Q03048	30.521	30.6415	30.5625	30.3412	30.5623	7.51731	30.3101	30.2632	30.3622	30.5356	30.5028	8.32303	0.130939	0.111515
COG1	YGL223C	Conserved oligomeric Golgi complex subunit 1	P53079	25.6911	25.6921	25.7945	25.7803	25.7086	3.49246	25.8188	25.5388	25.7784	25.6846	25.7492	7.37296	0.0193323	0.728883
COG2	YGR120C	Conserved oligomeric Golgi complex subunit 2	P53271	24.2558	24.5219	24.4574	24.2869	24.3484	7.89986	24.638	24.0992	23.6616	24.0941	24.1291	24.7203	0.249696	0.163838
COG3	YER157W	Conserved oligomeric Golgi complex subunit 3	P40094	25.9337	25.8729	25.7654	26.0275	25.7602	7.95927	26.0182	25.5274	25.8962	26.0516	26.2839	18.3475	-0.0834896	0.550851
COG4	YPR105C	Conserved oligomeric Golgi complex subunit 4	Q06096	25.8162	26.0774	25.9198	26.5711	26.0221	22.135	26.3105	26.2379	26.1043	26.1155	26.2501	6.21291	-0.122282	0.396216
COG5	YNL051W	Conserved oligomeric Golgi complex subunit 5	P53951	25.3295	25.7762	25.0774	25.4249	25.354	18.0484	25.8977	25.0737	26.0365	25.5894	25.952	24.1742	-0.317467	0.167052
COG6	YNL041C	Conserved oligomeric Golgi complex subunit 6	P53959	27.1476	27.2753	27.2351	27.359	27.2446	5.28823	27.17	27.0355	27.267	27.2348	27.3912	9.00031	0.0326419	0.642321
COG7	YGL005C	Conserved oligomeric Golgi complex subunit 7	P53195	26.6324	26.1334	26.6278	26.651	26.3806	14.7325	26.6335	26.143	26.3026	26.6116	26.4546	14.0918	0.0559753	0.694492
COG8	YML071C	Conserved oligomeric Golgi complex subunit 8	Q04632	27.464	27.3123	27.581	27.4911	27.2973	8.4156	27.6601	27.1681	27.5728	27.3909	27.6521	13.8114	-0.0596406	0.596959
COP1	YDL145C	Coatomer subunit alpha	P53622	31.7009	31.6557	31.8347	31.7257	31.7618	4.71274	31.7995	31.7719	31.6365	31.6898	31.7449	4.50446	0.00723	0.86776
COQ1	YBR003W	Hexaprenyl pyrophosphate synthase, mitochondrial	P18900	27.9681	27.9106	28.2453	27.9891	28.102	9.44597	28.094	27.9753	27.9334	28.1474	27.8588	8.19065	0.0412786	0.617087
COQ3	YOL096C	Hexaprenyldihydroxybenzoate methyltransferase, mitochondrial	P27680	26.7085	26.3789	26.8293	26.7036	26.7589	11.2782	27.5018	27.0283	26.27	26.6027	26.7316	33.7444	-0.151042	0.515545
COQ4	YDR204W	Ubiquinone biosynthesis protein COQ4, mitochondrial	O13525	25.0053	24.3836	25.0625	25.0339	25.1868	19.1538	25.7793	24.252	23.9455	24.4772	24.825	56.3649	0.278673	0.443356
COQ5	YML110C	2-methoxy-6-polyprenyl-1,4-benzoquinol methylase, mitochondrial	P49017	28.5947	28.4097	28.5108	28.6741	28.6317	7.16757	28.6731	28.7757	28.4032	28.3629	28.4373	12.9543	0.0337533	0.729602
COQ6	YGR255C	Ubiquinone biosynthesis monooxygenase COQ6	P53318	26.6539	26.6768	26.6585	26.8902	26.8516	8.08018	27.1403	26.5386	26.6948	26.5024	26.6939	19.0761	0.0321852	0.802825
COQ8	YGL119W	Probable serine/threonine-protein kinase COQ8, mitochondrial	P27697	28.1766	28.1343	28.0543	28.1205	27.8516	8.51541	28.0131	28.0923	27.9737	28.1192	28.2278	6.92894	-0.0177848	0.812423
COQ9	YLR201C	Ubiquinone biosynthesis protein COQ9, mitochondrial	Q05779	25.8582	26.0076	26.1187	26.2594	26.2543	11.5668	26.6449	25.4976	25.917	25.9104	26.1614	30.368	0.0733653	0.726865
COR1	YBL045C	Cytochrome b-c1 complex subunit 1, mitochondrial	P07256	31.5517	31.6024	31.3923	31.6255	31.379	8.01192	31.2671	31.4467	31.5635	31.4332	31.5446	7.96691	0.0591577	0.448505
COS4	YFL062W	Protein COS4;Protein COS3;Protein COS2;Protein COS1;Protein COS5;Protein COS6	P43542;P0CX13;P0CX12;P53822;P47187;P53344	25.6065	26.3073	26.064	25.6295	25.498	25.1829	25.8816	25.8535	25.8795	25.6388	25.6618	8.31191	0.0379976	0.823241
COS8	YHL048W	Protein COS8	P38723	21.9569	22.5537	22.3456	21.8447		23.0412	22.502	22.4388	22.7099	22.3225	21.764	22.2388	-0.17222	0.48118
COS9	YKL219W	Protein COS9	P36034	21.7135	22.0388	23.0199	22.6733	22.3666	35.2484	22.5709	22.6395	22.3295	22.3035	22.1679	13.709	-0.0398219	0.875373
COT1	YOR316C	Cobalt uptake protein COT1	P32798	28.4347	28.5645	28.38	28.5679	28.5542	5.94579	28.272	28.2589	28.5601	28.6261	28.3875	11.653	0.0793113	0.373137
COX1	YPL172C	Cytochrome c oxidase subunit 1	P00401	25.7557	25.8329	25.7609	25.7681	25.6229	5.20652	24.9892	25.6069	25.7249	25.5914	25.6967	18.3784	0.226263	0.144292
COX11	YPL132W	Cytochrome c oxidase assembly protein COX11, mitochondrial	P19516	25.3108	25.1134	25.482	25.3037	25.1128	10.9058	25.2401	24.9438	25.387	25.2154	25.3074	11.0678	0.0458275	0.665848
COX12	YLR038C	Cytochrome c oxidase subunit 6B	Q01519	24.0747	24.0195	23.3671	24.027	23.6734	19.5963	24.5098	24.062	24.0822	24.2512	23.9764	15.4044	-0.343995	0.0721966
COX13	YGL191W	Cytochrome c oxidase subunit 6A, mitochondrial	P32799	23.7255	23.1921	23.785	23.5538	23.3122	17.4388	23.743	23.987	23.0414	23.2444	24.007	28.6416	-0.0908901	0.700411
COX14	YML129C	Cytochrome c oxidase assembly protein COX14	P39103	23.4238	23.1816	23.4747	23.4156	23.1683	9.93916	23.8169	23.9501	23.5015	23.5974	23.5158	14.1017	-0.343546	0.0142203
COX15	YER141W	Cytochrome c oxidase assembly protein COX15	P40086	26.7441	26.4459	26.4503	26.5952	26.7009	9.55529	26.8588	26.3383	26.44	26.4074	26.7796	16.7638	0.0224648	0.859149
COX17	YLL009C	Cytochrome c oxidase copper chaperone	Q12287	24.2429	23.7731	23.3914	23.7265	23.9236	21.6211	23.5858	21.7439	23.9449	23.4685	23.8295	42.0935	0.496999	0.275773
COX2	YDR231C	Cytochrome c oxidase subunit 2	P00410	28.2492	28.2965	28.3329	28.3016	28.1413	5.08124	28.1681	28.3903	28.1524	28.1288	28.2138	7.56985	0.0535714	0.380678
COX20	YDR231C	Cytochrome c oxidase protein 20, mitochondrial	Q04935	27.0213	27.0485	26.6982	26.9428	26.7652	10.6336	26.8653	26.3757	27.0811	26.9158	27.3291	23.0267	-0.0182108	0.918154
COX4	YGL187C	Cytochrome c oxidase subunit 4, mitochondrial	P04037	27.0173	27.4331	26.3881	27.065	26.9616	24.5588	26.6521	27.162	27.0737	26.9193	26.7341	14.9302	0.0647459	0.747065
COX5A	YNL052W	Cytochrome c oxidase polypeptide 5A, mitochondrial	P00424	24.9958	24.7744	24.7424	25.151	24.187	23.2954	24.0799	24.1348	25.1728	25.0321	25.5011	41.3391	-0.013993	0.967238
COX5B	YIL111W	Cytochrome c oxidase polypeptide 5B, mitochondrial	P00425	28.0145	28.0271	27.9618	28.3516	28.0851	11.2678	28.3969	27.6557	28.0984	28.0914	28.391	19.6636	-0.0386919	0.805333
COX6	YHR051W	Cytochrome c oxidase subunit 6, mitochondrial	P00427	25.8107	26.2082	25.359	26.0223	26.0522	20.7921	26.2796	26.426	26.2261	25.9849	26.0926	11.7962	-0.311358	0.09707
[truncated: 3,325 more rows]
